# Supplementary material for: Ligand-controlled palladium-catalyzed regiodivergent aminocarbonylation of tert-alcohols
Source: PubMed Central journal article supplement (PMC11575597; doi:10.1039/d4sc06011c), 2024-11-15

## Supporting Information

### Ligand-Controlled Palladium-Catalyzed Regiodivergent Aminocarbonylation of *tert*-Alcohols

Xing-Wei Gu,<sup>[a]</sup> Yan-Hua Zhao,<sup>[a]</sup> and Xiao-Feng Wu\*<sup>[a,b]</sup>

[a] X.-W. Gu, Y.-H. Zhao, Prof. Dr. X.-F. Wu, Leibniz-Institut für Katalyse e.V., Albert-Einstein-Straße 29a, 18059 Rostock, Germany, E-mail: xiao-feng.wu@catalysis.de, xwu2020@dicp.ac.cn

[b] Prof. Dr. X.-F. Wu, Dalian National Laboratory for Clean Energy, Dalian Institute of Chemical Physics, Chinese Academy of Sciences, 116023, Dalian, Liaoning, China

## Contents

|                                                                                         |     |
|-----------------------------------------------------------------------------------------|-----|
| 1. General Experimental.....                                                            | S3  |
| 2. Optimization studies .....                                                           | S4  |
| 3. General Procedure for the aminocarbonylation.....                                    | S6  |
| 3.1 General Procedure I the aminocarbonylation toward amide with quaternary carbon..... | S6  |
| 3.2 General Procedure II: the aminocarbonylation toward $\beta$ -substituted amide..... | S6  |
| 4. Characterization of the Products.....                                                | S7  |
| 5. Intermediate verification experiment.....                                            | S38 |
| 6. Reference .....                                                                      | S39 |
| 7. NMR spectra of products.....                                                         | S40 |

## 1. General Experimental.

**Reagents and solvents:** Unless otherwise noted, the chemicals were commercially available from Sigma-Aldrich, TCI, BLD or Alfa Aesar and were used without further purification. The reaction does not require the glovebox.

**Purification:** The products were isolated from the reaction mixture by column chromatography on silica gel 60, 0.063-0.2 mm, 70-230 mesh (Merck). Gradient flash chromatography was conducted eluting with PE/EA, PE refers to pentane and EA refers to ethyl acetate, they were listed as volume/volume ratios.

**Data collection:** GC-yields were calculated using hexadecane as internal standard. GC analysis was performed on an Agilent HP-7890A instrument with FID detector and HP-5 capillary column (polydimethylsiloxane with 5% phenyl groups, 30 m, 0.32 mm i.d., 0.25  $\mu\text{m}$  film thickness) using argon as carrier gas. High resolution mass spectra (HRMS) were recorded on Agilent 6210. NMR spectra were recorded on Bruker Avance 300 and Bruker ARX 400 spectrometers. Chemical shifts (ppm) are given relative to solvent: references for  $\text{CDCl}_3$  were 7.26 ppm ( $^1\text{H}$  NMR) and 77.00 ppm ( $^{13}\text{C}$  NMR). All measurements were carried out at room temperature unless otherwise stated.

## 2. Optimization studies

**Table 1.** Optimization of the aminocarbonylation toward amide with quaternary carbon.<sup>[a]</sup>

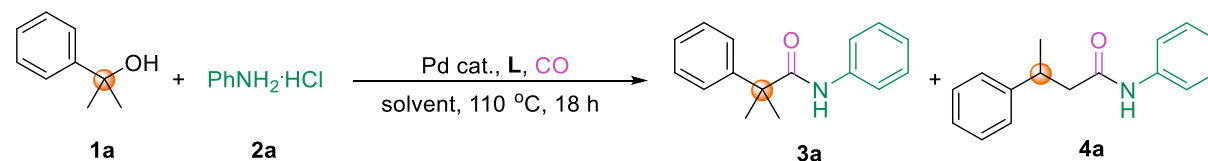

| entry           | Pd cat.                               | ligand                                                              | solvent     | concentration | Yield (%) <sup>b</sup> | 3a:4a  |
|-----------------|---------------------------------------|---------------------------------------------------------------------|-------------|---------------|------------------------|--------|
| 1               | PdCl <sub>2</sub>                     | PPh <sub>3</sub>                                                    | DCE         | 0.1           | 47                     | 6:1    |
| 2               | PdCl <sub>2</sub>                     | (4-OMeC <sub>6</sub> H <sub>4</sub> ) <sub>3</sub> P                | DCE         | 0.1           | 35                     | 5:1    |
| 3               | PdCl <sub>2</sub>                     | (4-FC <sub>6</sub> H <sub>4</sub> ) <sub>3</sub> P                  | DCE         | 0.1           | 49                     | 6:1    |
| 4               | PdCl <sub>2</sub>                     | (4-CF <sub>3</sub> C <sub>6</sub> H <sub>4</sub> ) <sub>3</sub> P   | DCE         | 0.1           | 54                     | 6:1    |
| 5               | PdCl <sub>2</sub>                     | <i>n</i> BuPAd <sub>2</sub>                                         | DCE         | 0.1           | 35                     | 10:1   |
| 6               | PdCl <sub>2</sub>                     | X-Phos                                                              | DCE         | 0.1           | 17                     | > 20:1 |
| 7               | Pd(OAc) <sub>2</sub>                  | (4-CF <sub>3</sub> C <sub>6</sub> H <sub>4</sub> ) <sub>3</sub> P   | DCE         | 0.1           | 55                     | 4:1    |
| 8               | [Pd(allyl)Cl] <sub>2</sub>            | (4-CF <sub>3</sub> C <sub>6</sub> H <sub>4</sub> ) <sub>3</sub> P   | DCE         | 0.1           | 62                     | 6:1    |
| 9               | [Pd(cinnamyl)Cl] <sub>2</sub>         | (4-CF <sub>3</sub> C <sub>6</sub> H <sub>4</sub> ) <sub>3</sub> P   | DCE         | 0.1           | 62                     | 6:1    |
| 10              | Pd <sub>2</sub> dba <sub>3</sub>      | (4-CF <sub>3</sub> C <sub>6</sub> H <sub>4</sub> ) <sub>3</sub> P   | DCE         | 0.1           | 55                     | 5:1    |
| 11              | Pd(TFA) <sub>2</sub>                  | (4-CF <sub>3</sub> C <sub>6</sub> H <sub>4</sub> ) <sub>3</sub> P   | DCE         | 0.1           | 49 (17) <sup>c</sup>   | 3:1    |
| 12              | Pd(MeCN) <sub>2</sub> Cl <sub>2</sub> | (4-CF <sub>3</sub> C <sub>6</sub> H <sub>4</sub> ) <sub>3</sub> P   | DCE         | 0.1           | 43                     | 5:1    |
| 13              | Pd(acac) <sub>2</sub>                 | (4-CF <sub>3</sub> C <sub>6</sub> H <sub>4</sub> ) <sub>3</sub> P   | DCE         | 0.1           | 58                     | 5:1    |
| 14              | Pd(dba) <sub>2</sub>                  | (4-CF <sub>3</sub> C <sub>6</sub> H <sub>4</sub> ) <sub>3</sub> P   | DCE         | 0.1           | 57                     | 5:1    |
| 15              | [Pd(cinnamyl)Cl] <sub>2</sub>         | (3,5-CF <sub>3</sub> C <sub>6</sub> H <sub>3</sub> ) <sub>3</sub> P | DCE         | 0.1           | 67                     | > 20:1 |
| 16              | [Pd(cinnamyl)Cl] <sub>2</sub>         | (3,5-CF <sub>3</sub> C <sub>6</sub> H <sub>3</sub> ) <sub>3</sub> P | MeCN        | 0.1           | 17                     | 1:1    |
| 17              | [Pd(cinnamyl)Cl] <sub>2</sub>         | (3,5-CF <sub>3</sub> C <sub>6</sub> H <sub>3</sub> ) <sub>3</sub> P | 1,4-dioxane | 0.1           | 33                     | 13:1   |
| 18              | [Pd(cinnamyl)Cl] <sub>2</sub>         | (3,5-CF <sub>3</sub> C <sub>6</sub> H <sub>3</sub> ) <sub>3</sub> P | Toluene     | 0.1           | nd                     | -      |
| 19              | [Pd(cinnamyl)Cl] <sub>2</sub>         | (3,5-CF <sub>3</sub> C <sub>6</sub> H <sub>3</sub> ) <sub>3</sub> P | anisole     | 0.1           | 26                     | > 20:1 |
| 20              | [Pd(cinnamyl)Cl] <sub>2</sub>         | (3,5-CF <sub>3</sub> C <sub>6</sub> H <sub>3</sub> ) <sub>3</sub> P | DCE         | 0.2           | 70                     | > 20:1 |
| 21              | [Pd(cinnamyl)Cl] <sub>2</sub>         | (3,5-CF <sub>3</sub> C <sub>6</sub> H <sub>3</sub> ) <sub>3</sub> P | DCE         | 0.4           | 64                     | > 20:1 |
| 22 <sup>d</sup> | [Pd(cinnamyl)Cl] <sub>2</sub>         | (3,5-CF <sub>3</sub> C <sub>6</sub> H <sub>3</sub> ) <sub>3</sub> P | DCE         | 0.2           | 94                     | > 20:1 |

[a] Conditions: **1a** (0.3 mmol), **2a** (0.2 mmol), [Pd] (5 mol%), ligand (12 mol%), CO (40 bar), solvent (X mL), stirred at 110°C for 18 h. [b] Yields were determined by GC with hexadecane as the internal standard. [c] Yield of **4a** is shown in parentheses. [d] 30 h.



**Table 2.** Optimization of the aminocarbonylation toward  $\beta$ -substituted amide.<sup>[a]</sup>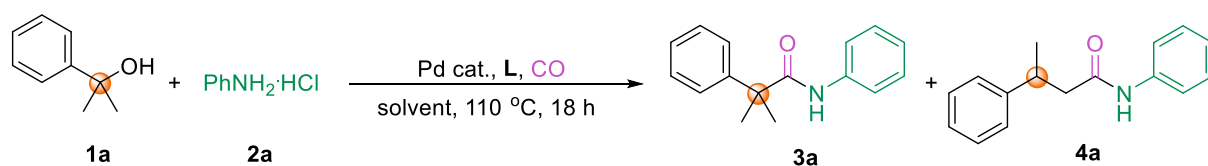

| entry | Pd cat.                       | [Pd]/L  | ligand     | CO     | Yield (%) <sup>b</sup> | 4a:3a  |
|-------|-------------------------------|---------|------------|--------|------------------------|--------|
| 1     | Pd(TFA) <sub>2</sub>          | 5%/6%   | NIXantphos | 40 bar | 85                     | 17:1   |
| 2     | Pd(OAc) <sub>2</sub>          | 5%/6%   | NIXantphos | 40 bar | 82                     | 15:1   |
| 3     | [Pd(cinnamyl)Cl] <sub>2</sub> | 5%/6%   | NIXantphos | 40 bar | 78                     | 15:1   |
| 4     | PdCl <sub>2</sub>             | 5%/6%   | NIXantphos | 40 bar | 75                     | 16:1   |
| 5     | Pd(dba) <sub>2</sub>          | 5%/6%   | NIXantphos | 40 bar | 83                     | 13:1   |
| 6     | Pd(acac) <sub>2</sub>         | 5%/6%   | NIXantphos | 40 bar | 84                     | 15:1   |
| 7     | Pd(TFA) <sub>2</sub>          | 3%/3.6% | NIXantphos | 40 bar | 86                     | 17:1   |
| 8     | Pd(TFA) <sub>2</sub>          | 1%/1.2% | NIXantphos | 40 bar | 82                     | 19:1   |
| 9     | Pd(TFA) <sub>2</sub>          | 1%/1.2% | DPPP       | 40 bar | nd                     | -      |
| 10    | Pd(TFA) <sub>2</sub>          | 1%/1.2% | DPEPhos    | 40 bar | 50                     | 16:1   |
| 11    | Pd(TFA) <sub>2</sub>          | 1%/1.2% | Xantphos   | 40 bar | 72                     | 15:1   |
| 12    | Pd(TFA) <sub>2</sub>          | 1%/1.2% | Dppf       | 40 bar | 11                     | -      |
| 13    | Pd(TFA) <sub>2</sub>          | 1%/1.2% | Binap      | 40 bar | 5                      | -      |
| 14    | Pd(TFA) <sub>2</sub>          | 1%/1.2% | NIXantphos | 20 bar | 98                     | > 20:1 |
| 15    | Pd(TFA) <sub>2</sub>          | 1%/1.2% | NIXantphos | 1 bar  | 34                     | > 20:1 |

[a] Conditions: **1a** (0.3 mmol), **2a** (0.2 mmol), Pd(TFA)<sub>2</sub> (X mol%), ligand (Y mol%), CO (Z bar), DCE (2.0 mL), stirred at 110°C for 18 h. Yields were determined by GC with hexadecane as the internal standard. [b] Yields were determined by GC with hexadecane as the internal standard.

### 3. General Procedure for the aminocarbonylation.

#### 3.1 General Procedure I the aminocarbonylation toward amide with quaternary carbon.

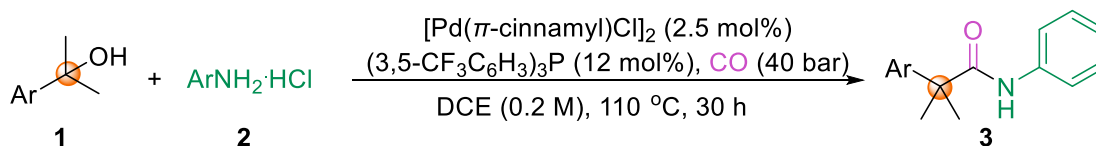

A 4 mL screw-cap vial was charged with  $[\text{Pd}(\pi\text{-cinnamyl)Cl}]_2$  (2.6 mg, 2.5 mol%),  $(4\text{-CF}_3\text{C}_6\text{H}_4)_3\text{P}$  (16.1 mg, 12 mol%),  $\text{ArNH}_2\cdot\text{HCl}$  (0.2 mmol, 1.0 equiv.), alcohols (0.3 mmol, 1.5 equiv.) and an oven-dried stirring bar. The vial was closed with a Teflon septum and cap and connected to the atmosphere via a needle. After DCE (1.0 mL) was added with a syringe under argon atmosphere, the vial was moved to an alloy plate and put into a Parr 4560 series autoclave (300 mL) under argon atmosphere. At room temperature, the autoclave was flushed three times with  $\text{N}_2$  and  $\text{CO}$ , respectively, and finally charged with 40 atm  $\text{CO}$ . The autoclave was placed on a heating plate equipped with a magnetic stirrer and an aluminum block. The reaction mixture was heated to  $110^\circ\text{C}$  for 30 h. After reaction, cooling to room temperature. The crude product was purified by silica gel chromatography (pentane/EA) to afford the corresponding product.

#### 3.2 General Procedure II: the aminocarbonylation toward $\beta$ -substituted amide.

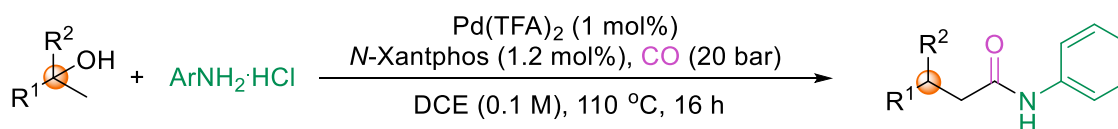

A 4 mL screw-cap vial was charged with  $\text{Pd}(\text{TFA})_2$  (0.7 mg, 1 mol%),  $\text{NiXantphos}$  (1.4 mg, 1.2 mol%),  $\text{ArNH}_2\cdot\text{HCl}$  (0.2 mmol, 1.0 equiv.), alcohols (0.3 mmol, 1.5 equiv.) and an oven-dried stirring bar. The vial was closed with a Teflon septum and cap and connected to the atmosphere via a needle. After DCE (2.0 mL) was added with a syringe, the vial was moved to an alloy plate and put into a Parr 4560 series autoclave (300 mL). At room temperature, the autoclave was flushed three times with  $\text{N}_2$  and  $\text{CO}$ , respectively, and finally charged with 20 atm  $\text{CO}$ . The autoclave was placed on a heating plate equipped with a magnetic stirrer and an aluminum block. The reaction mixture was heated to  $110^\circ\text{C}$  for 18 h. After reaction, cooling to room temperature. The crude product was purified by silica gel chromatography (pentane/EA) to afford the corresponding product.

#### 4. Characterization of the Products.

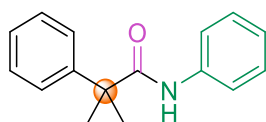

**3a**

#### **2-methyl-N,2-diphenylpropanamide (3a)** <sup>[1]</sup>

Chromatography Pentane/EA = 15:1 (v/v), 43.4 mg (91%).

<sup>1</sup>H NMR (300 MHz, CDCl<sub>3</sub>) δ 7.42 – 7.08 (m, 9H), 7.05 – 6.91 (m, 1H), 6.73 (s, 1H), 1.58 (s, 6H).

<sup>13</sup>C NMR (75 MHz, CDCl<sub>3</sub>) δ 175.5, 144.5, 137.9, 129.0, 128.8, 127.3, 126.4, 124.1, 119.6, 48.0, 27.0.

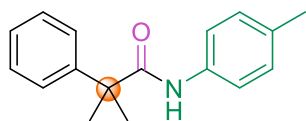

**3b**

#### **2-methyl-2-phenyl-N-(p-tolyl)propanamide (3b)** <sup>[1]</sup>

Chromatography Pentane/EA = 15:1 (v/v), 40.2 mg (79%).

<sup>1</sup>H NMR (300 MHz, CDCl<sub>3</sub>) δ 7.40 – 7.27 (m, 4H), 7.25 – 7.19 (m, 1H), 7.18 – 7.11 (m, 2H), 7.00 – 6.92 (m, 2H), 6.67 (s, 1H), 2.19 (s, 3H), 1.57 (s, 6H).

<sup>13</sup>C NMR (75 MHz, CDCl<sub>3</sub>) δ 175.4, 144.7, 135.4, 133.7, 129.3, 128.9, 127.3, 126.4, 119.7, 47.9, 27.0, 20.7.

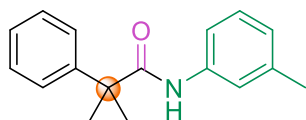

**3c**

#### **2-methyl-2-phenyl-N-(m-tolyl)propanamide (3c)** <sup>[1]</sup>

Chromatography Pentane/EA = 15:1 (v/v), 46.5 mg (92%).

<sup>1</sup>H NMR (300 MHz, CDCl<sub>3</sub>) δ 7.40 – 7.27 (m, 4H), 7.25 – 7.19 (m, 1H), 7.16 – 7.13 (m, 1H), 7.12 – 6.98 (m, 2H), 6.84 – 6.73 (m, 2H), 6.69 (s, 1H), 2.20 (s, 3H), 1.57 (s, 6H).

<sup>13</sup>C NMR (75 MHz, CDCl<sub>3</sub>) δ 175.5, 144.5, 138.7, 137.8, 128.9, 128.6, 127.3, 126.4, 124.8, 120.2, 116.6, 48.0, 27.0, 21.3.

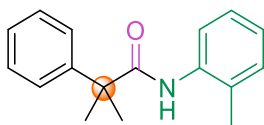

**3d**

**2-methyl-2-phenyl-N-(o-tolyl)propanamide (3d) <sup>[1]</sup>**

Chromatography Pentane/EA = 15:1 (v/v), 42.7 mg (84%).

<sup>1</sup>H NMR (300 MHz, CDCl<sub>3</sub>) δ 7.91 – 7.81 (m, 1H), 7.57 – 7.48 (m, 2H), 7.47 – 7.40 (m, 2H), 7.38 – 7.30 (m, 1H), 7.24 – 7.14 (m, 1H), 7.12 – 6.94 (m, 2H), 6.72 (s, 1H), 1.81 (s, 3H), 1.72 (s, 6H).

<sup>13</sup>C NMR (75 MHz, CDCl<sub>3</sub>) δ 175.5, 144.6, 135.9, 130.2, 129.0, 127.9, 127.4, 126.7, 126.6, 124.5, 121.8, 48.0, 26.8, 16.9.

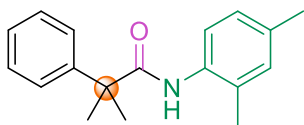

**3e**

**N-(2,4-dimethylphenyl)-2-methyl-2-phenylpropanamide (3e)**

Chromatography Pentane/EA = 15:1 (v/v), 40.9 mg (77%).

<sup>1</sup>H NMR (300 MHz, CDCl<sub>3</sub>) δ 7.59 (d, *J* = 8.2 Hz, 1H), 7.43 – 7.38 (m, 2H), 7.37 – 7.29 (m, 2H), 7.28 – 7.19 (m, 1H), 6.94 – 6.84 (m, 1H), 6.83 – 6.76 (m, 1H), 6.54 (s, 1H), 2.16 (s, 3H), 1.70 (s, 3H), 1.61 (s, 6H).

<sup>13</sup>C NMR (75 MHz, CDCl<sub>3</sub>) δ 175.5, 144.8, 134.2, 133.2, 130.9, 128.9, 128.3, 127.3, 127.1, 126.6, 122.1, 47.9, 26.9, 20.7, 16.9.

HRMS (ES-TOF): *m/z* calcd. for C<sub>18</sub>H<sub>21</sub>NONa<sup>+</sup> [*M*+Na<sup>+</sup>] 290.1515, found 290.1518.

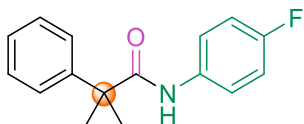

**3f**

**N-(4-fluorophenyl)-2-methyl-2-phenylpropanamide (3f)**

Chromatography Pentane/EA = 15:1 (v/v), 26.1 mg (51%).

<sup>1</sup>H NMR (300 MHz, CDCl<sub>3</sub>) δ 7.41 – 7.29 (m, 4H), 7.28 – 7.16 (m, 3H), 6.94 – 6.79 (m, 2H), 6.71 (s, 1H), 1.58 (s, 6H).

<sup>13</sup>C NMR (75 MHz, CDCl<sub>3</sub>) δ 175.6, 159.2 (d, *J* = 243.3 Hz), 144.4, 133.9 (d, *J* = 2.7 Hz), 129.0, 127.4, 126.4, 121.5 (d, *J* = 7.9 Hz), 115.4 (d, *J* = 22.4 Hz), 47.9, 27.0.

<sup>19</sup>F NMR (282 MHz, CDCl<sub>3</sub>) δ -118.2 – -118.3 (m).

HRMS (ES-TOF): *m/z* calcd. for C<sub>16</sub>H<sub>16</sub>FNONa<sup>+</sup> [*M*+Na<sup>+</sup>] 280.1108, found 280.1111.

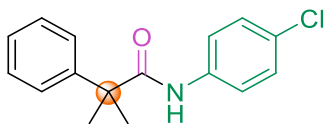

**3g**

***N*-(4-chlorophenyl)-2-methyl-2-phenylpropanamide (3g)** <sup>[1]</sup>

Chromatography Pentane/EA = 15:1 (v/v), 43.7 mg (80%).

<sup>1</sup>H NMR (300 MHz, CDCl<sub>3</sub>) δ 7.40 – 7.18 (m, 7H), 7.14 – 7.03 (m, 2H), 6.75 (s, 1H), 1.57 (s, 6H).

<sup>13</sup>C NMR (75 MHz, CDCl<sub>3</sub>) δ 175.6, 144.3, 136.5, 129.0, 128.8, 127.4, 126.4, 120.9, 48.0, 26.9.

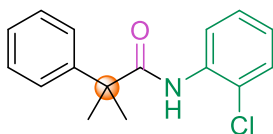

**3h**

***N*-(2-chlorophenyl)-2-methyl-2-phenylpropanamide (3h)** <sup>[1]</sup>

Chromatography Pentane/EA = 15:1 (v/v), 31.0 mg (57%).

<sup>1</sup>H NMR (300 MHz, CDCl<sub>3</sub>) δ 8.32 – 8.23 (m, 1H), 7.45 – 7.31 (m, 5H), 7.28 – 7.24 (m, 1H), 7.19 – 7.15 (m, 2H), 6.93 – 6.85 (m, 1H), 1.63 (s, 6H).

<sup>13</sup>C NMR (75 MHz, CDCl<sub>3</sub>) δ 175.7, 144.0, 134.7, 129.0, 128.8, 127.6, 127.5, 126.5, 124.3, 122.8, 121.1, 48.3, 26.8.

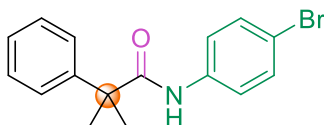

**3i**

***N*-(4-bromophenyl)-2-methyl-2-phenylpropanamide (3i)** <sup>[1]</sup>

Chromatography Pentane/EA = 15:1 (v/v), 40.8 mg (64%).

<sup>1</sup>H NMR (300 MHz, CDCl<sub>3</sub>) δ 7.40 – 7.11 (m, 1H), 6.72 (s, 0H), 1.58 (s, 1H).

<sup>13</sup>C NMR (75 MHz, CDCl<sub>3</sub>) δ 175.6, 144.3, 137.0, 131.7, 129.0, 127.5, 126.4, 121.2, 116.6, 48.1, 26.9.

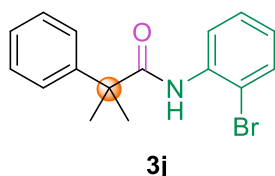

***N*-(2-chlorophenyl)-2-methyl-2-phenylpropanamide (3j)** <sup>[1]</sup>

Chromatography Pentane/EA = 15:1 (v/v), 55.4 mg (87%).

<sup>1</sup>H NMR (300 MHz, CDCl<sub>3</sub>) δ 8.26 (dd, *J* = 8.3, 1.6 Hz, 1H), 7.44 – 7.33 (m, 5H), 7.29 – 7.15 (m, 3H), 6.90 – 6.77 (m, 1H), 1.64 (s, 6H).

<sup>13</sup>C NMR (75 MHz, CDCl<sub>3</sub>) δ 175.8, 144.0, 135.9, 132.1, 129.1, 128.2, 127.5, 126.6, 124.8, 121.3, 113.3, 48.3, 26.8.

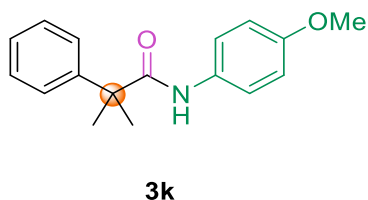

***N*-(4-methoxyphenyl)-2-methyl-2-phenylpropanamide (3k)** <sup>[1]</sup>

Chromatography Pentane/EA = 10:1 (v/v), 34.5 mg (64%).

<sup>1</sup>H NMR (300 MHz, CDCl<sub>3</sub>) δ 7.43 – 7.29 (m, 4H), 7.26 – 7.12 (m, 3H), 6.75 – 6.68 (m, 2H), 6.64 (s, 1H), 3.67 (s, 3H), 1.58 (s, 6H).

<sup>13</sup>C NMR (75 MHz, CDCl<sub>3</sub>) δ 175.4, 156.3, 144.7, 131.0, 128.9, 127.3, 126.5, 121.5, 114.0, 55.4, 47.8, 27.0.

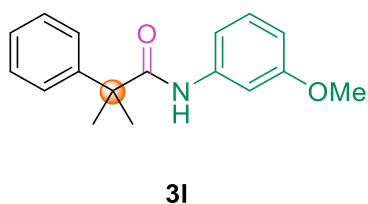

***N*-(3-methoxyphenyl)-2-methyl-2-phenylpropanamide (3l)** <sup>[1]</sup>

Chromatography Pentane/EA = 10:1 (v/v), 38.0 mg (71%).

<sup>1</sup>H NMR (300 MHz, CDCl<sub>3</sub>) δ 7.39 – 7.28 (m, 4H), 7.26 – 7.20 (m, 1H), 7.18 – 7.13 (m, 1H), 7.04 (t, *J* = 8.1 Hz, 1H), 6.73 (s, 1H), 6.69 – 6.59 (m, 1H), 6.58 – 6.46 (m, 1H), 3.68 (s, 3H), 1.58 (s, 6H).

<sup>13</sup>C NMR (75 MHz, CDCl<sub>3</sub>) δ 175.6, 160.1, 144.4, 139.2, 129.4, 129.0, 127.4, 126.4, 111.5, 110.2, 105.0, 55.2, 48.1, 27.0.

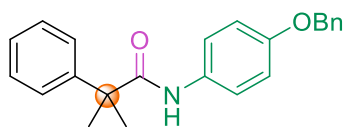

**3m**

***N*-(4-(benzyloxy)phenyl)-2-methyl-2-phenylpropanamide (3m)**

Chromatography Pentane/EA = 10:1 (v/v), 26.4 mg (38%).

$^1\text{H}$  NMR (300 MHz,  $\text{CDCl}_3$ )  $\delta$  7.42 – 7.12 (m, 12H), 6.85 – 6.74 (m, 2H), 6.63 (s, 1H), 4.94 (s, 2H), 1.58 (s, 6H).

$^{13}\text{C}$  NMR (75 MHz,  $\text{CDCl}_3$ )  $\delta$  175.4, 155.4, 144.7, 136.9, 131.3, 128.9, 128.5, 127.9, 127.4, 127.3, 126.5, 121.5, 115.1, 70.2, 47.8, 27.0.

HRMS (ES-TOF):  $m/z$  calcd. for  $\text{C}_{23}\text{H}_{23}\text{NO}_2\text{Na}^+$  [ $\text{M}+\text{Na}^+$ ] 368.1621, found 368.1623.

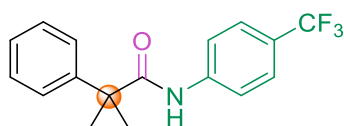

**3n**

**2-methyl-2-phenyl-*N*-(4-(trifluoromethyl)phenyl)propanamide (3n)<sup>[1]</sup>**

Chromatography Pentane/EA = 15:1 (v/v), 31.5 mg (51%).

$^1\text{H}$  NMR (300 MHz,  $\text{CDCl}_3$ )  $\delta$  7.45 – 7.21 (m, 9H), 6.86 (s, 1H), 1.59 (s, 6H).

$^{13}\text{C}$  NMR (75 MHz,  $\text{CDCl}_3$ )  $\delta$  175.9, 144.1, 141.0, 129.1, 127.6, 126.4, 126.1 (q,  $J = 3.8$  Hz), 124.0 (q,  $J = 270.0$  Hz), 119.1, 48.2, 26.9.

$^{19}\text{F}$  NMR (282 MHz,  $\text{CDCl}_3$ )  $\delta$  -62.10.

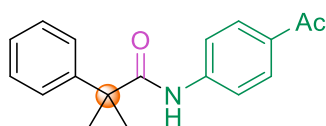

**3o**

***N*-(4-acetylphenyl)-2-methyl-2-phenylpropanamide (3o)**

Chromatography Pentane/EA = 3:1 (v/v), 39.4 mg (70%).

$^1\text{H}$  NMR (300 MHz,  $\text{CDCl}_3$ )  $\delta$  7.82 – 7.71 (m, 2H), 7.41 – 7.20 (m, 7H), 7.08 – 6.98 (m, 1H), 2.43 (d,  $J = 0.7$  Hz, 3H), 1.59 (s, 6H).

$^{13}\text{C}$  NMR (75 MHz,  $\text{CDCl}_3$ )  $\delta$  196.8, 175.8, 144.0, 142.3, 132.6, 129.5, 129.0, 127.5, 126.3, 118.7, 48.2, 26.8, 26.3.

HRMS (ES-TOF):  $m/z$  calcd. for  $\text{C}_{18}\text{H}_{19}\text{NO}_2\text{Na}^+$  [ $\text{M}+\text{Na}^+$ ] 304.1308, found 304.1313.

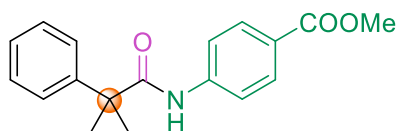

**3p**

**methyl 4-(2-methyl-2-phenylpropanamido)benzoate (3p)** <sup>[1]</sup>

Chromatography Pentane/EA = 8:1 (v/v), 35.1 mg (59%).

<sup>1</sup>H NMR (300 MHz, CDCl<sub>3</sub>) δ 7.91 – 7.79 (m, 0H), 7.44 – 7.21 (m, 1H), 6.90 (s, 0H), 3.79 (s, 1H), 1.59 (s, 1H).

<sup>13</sup>C NMR (75 MHz, CDCl<sub>3</sub>) δ 175.8, 166.5, 144.1, 142.1, 130.7, 129.1, 127.6, 126.4, 125.4, 118.6, 51.9, 48.2, 26.9.

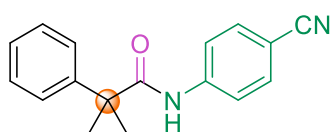

**3q**

**N-(4-cyanophenyl)-2-methyl-2-phenylpropanamide (3q)** <sup>[1]</sup>

Chromatography Pentane/EA = 5:1 (v/v), 21.4 mg (41%).

<sup>1</sup>H NMR (300 MHz, CDCl<sub>3</sub>) δ 7.58 – 7.46 (m, 4H), 7.44 – 7.30 (m, 5H), 6.97 (s, 1H), 1.67 (s, 6H).

<sup>13</sup>C NMR (75 MHz, CDCl<sub>3</sub>) δ 175.9, 143.8, 141.9, 133.1, 129.2, 127.7, 126.4, 119.3, 118.8, 106.9, 48.3, 26.8.

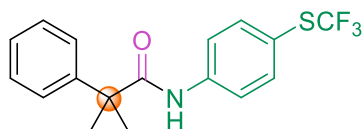

**3r**

**2-methyl-2-phenyl-N-(4-((trifluoromethyl)thio)phenyl)propanamide (3r)**

Chromatography Pentane/EA = 8:1 (v/v), 45.9 mg (68%).

<sup>1</sup>H NMR (300 MHz, CDCl<sub>3</sub>) δ 7.50 – 7.40 (m, 2H), 7.38 – 7.21 (m, 7H), 6.84 (s, 1H), 1.58 (s, 6H).

<sup>13</sup>C NMR (75 MHz, CDCl<sub>3</sub>) δ 175.8, 144.0, 140.5, 137.3, 129.5 (q, *J* = 307.5 Hz), 129.1, 127.6, 126.4, 120.0, 118.5 (q, *J* = 2.0 Hz), 48.2, 26.9.

<sup>19</sup>F NMR (282 MHz, CDCl<sub>3</sub>) δ -43.38.

HRMS (ES-TOF): *m/z* calcd. for C<sub>17</sub>H<sub>16</sub>F<sub>3</sub>NOSH<sup>+</sup> [M+H<sup>+</sup>] 340.0978, found 340.0980.



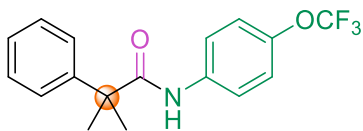

**3s**

**2-methyl-2-phenyl-N-(4-(trifluoromethoxy)phenyl)propanamide (3s)**

Chromatography Pentane/EA = 8:1 (v/v), 36.1 mg (56%).

$^1\text{H}$  NMR (300 MHz,  $\text{CDCl}_3$ )  $\delta$  7.44 – 7.20 (m, 7H), 7.08 – 6.98 (m, 2H), 6.76 (s, 1H), 1.59 (s, 6H).

$^{13}\text{C}$  NMR (75 MHz,  $\text{CDCl}_3$ )  $\delta$  175.7, 145.1, 144.3, 136.6, 129.1, 127.5, 126.4, 122.1, 121.6, 120.8, 48.0, 26.9.

$^{19}\text{F}$  NMR (282 MHz,  $\text{CDCl}_3$ )  $\delta$  -58.19.

HRMS (ES-TOF):  $m/z$  calcd. for  $\text{C}_{17}\text{H}_{16}\text{F}_3\text{NO}_2\text{H}^+$  [ $\text{M}+\text{H}^+$ ] 324.1206, found 324.1203.

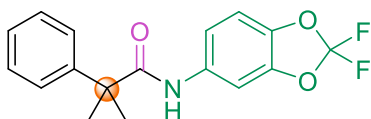

**3t**

**N-(2,2-difluorobenzo[d][1,3]dioxol-5-yl)-2-methyl-2-phenylpropanamide (3t)**

Chromatography Pentane/EA = 5:1 (v/v), 42.2 mg (66%).

$^1\text{H}$  NMR (300 MHz,  $\text{CDCl}_3$ )  $\delta$  7.49 (d,  $J$  = 2.1 Hz, 1H), 7.45 – 7.29 (m, 5H), 6.88 (dd,  $J$  = 8.6, 0.4 Hz, 1H), 6.84 (s, 1H), 6.72 (dd,  $J$  = 8.6, 2.1 Hz, 1H), 1.66 (s, 6H).

$^{13}\text{C}$  NMR (75 MHz,  $\text{CDCl}_3$ )  $\delta$  175.7, 144.2, 143.8, 140.0, 134.0, 131.7 (t,  $J$  = 255.0 Hz), 129.1, 127.5, 126.4, 114.4, 109.0, 103.0, 48.0, 26.9.

$^{19}\text{F}$  NMR (282 MHz,  $\text{CDCl}_3$ )  $\delta$  -50.05.

HRMS (ES-TOF):  $m/z$  calcd. for  $\text{C}_{17}\text{H}_{15}\text{F}_2\text{NO}_3\text{H}^+$  [ $\text{M}+\text{H}^+$ ] 320.1093, found 320.1100.

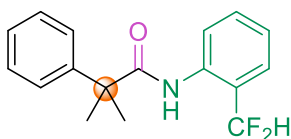

**3u**

**N-(2-(difluoromethyl)phenyl)-2-methyl-2-phenylpropanamide (3u)**

Chromatography Pentane/EA = 15:1 (v/v), 54.8 mg (95%).

$^1\text{H}$  NMR (300 MHz,  $\text{CDCl}_3$ )  $\delta$  8.27 (d,  $J$  = 8.2 Hz, 1H), 7.43 – 7.02 (m, 7H), 6.95 – 6.87 (m, 2H), 6.08 (t,  $J$  = 73.5 Hz, 1H), 1.60 (s, 6H).

$^{13}\text{C}$  NMR (75 MHz,  $\text{CDCl}_3$ )  $\delta$  175.6, 144.0, 139.9, 130.4, 129.0, 127.4, 126.4, 126.2, 123.8, 121.0, 118.9, 115.9 (t,  $J$  = 255.0 Hz), 48.2, 26.7.

$^{19}\text{F}$  NMR (282 MHz,  $\text{CDCl}_3$ )  $\delta$  -80.24 (d,  $J$  = 73.6 Hz).

HRMS (ES-TOF):  $m/z$  calcd. for  $\text{C}_{17}\text{H}_{18}\text{F}_2\text{NO}^+$  [ $\text{M}+\text{H}^+$ ] 290.1351, found 290.1355.

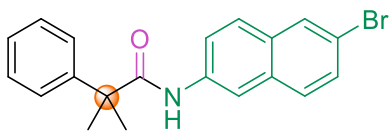

**3v**

***N*-(6-bromonaphthalen-2-yl)-2-methyl-2-phenylpropanamide (3v)**

Chromatography Pentane/EA = 15:1 (v/v), 25.6 mg (35%).

$^1\text{H}$  NMR (300 MHz,  $\text{CDCl}_3$ )  $\delta$  8.13 (d,  $J$  = 2.2 Hz, 1H), 7.88 (d,  $J$  = 1.9 Hz, 1H), 7.61 (d,  $J$  = 8.7 Hz, 2H), 7.52 – 7.30 (m, 6H), 7.21 (dd,  $J$  = 8.8, 2.2 Hz, 1H), 6.96 (s, 1H), 1.71 (s, 6H).

$^{13}\text{C}$  NMR (75 MHz,  $\text{CDCl}_3$ )  $\delta$  175.9, 144.4, 135.8, 132.3, 131.5, 129.9, 129.5, 129.3, 129.1, 127.7, 127.6, 126.5, 120.7, 118.7, 116.2, 48.2, 27.1.

HRMS (ES-TOF):  $m/z$  calcd. for  $\text{C}_{20}\text{H}_{18}\text{BrNONa}^+ [\text{M}+\text{Na}^+]$  390.0464, found 390.0473.

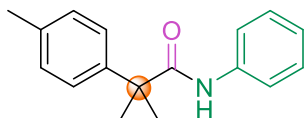

**3w**

**2-methyl-*N*-phenyl-2-(*p*-tolyl)propanamide (3w) <sup>[1]</sup>**

Chromatography Pentane/EA = 15:1 (v/v), 49.7 mg (98%).

$^1\text{H}$  NMR (400 MHz,  $\text{CDCl}_3$ )  $\delta$  7.43 – 7.34 (m, 4H), 7.32 – 7.20 (m, 4H), 7.11 – 7.05 (m, 1H), 6.89 (s, 1H), 2.41 (s, 3H), 1.69 (s, 6H).

$^{13}\text{C}$  NMR (101 MHz,  $\text{CDCl}_3$ )  $\delta$  175.8, 141.5, 138.0, 137.0, 129.6, 128.8, 126.3, 124.0, 119.5, 47.6, 27.0, 20.9.

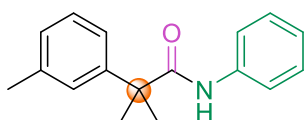

**3x**

**2-methyl-*N*-phenyl-2-(*m*-tolyl)propanamide (3x) <sup>[1]</sup>**

Chromatography Pentane/EA = 15:1 (v/v), 49.9 mg (99%).

$^1\text{H}$  NMR (400 MHz,  $\text{CDCl}_3$ )  $\delta$  7.45 – 7.37 (m, 2H), 7.36 – 7.24 (m, 5H), 7.21 – 7.13 (m, 1H), 7.12 – 7.04 (m, 1H), 6.88 (s, 1H), 2.42 (s, 3H), 1.69 (s, 6H).

$^{13}\text{C}$  NMR (101 MHz,  $\text{CDCl}_3$ )  $\delta$  175.6, 144.4, 138.6, 138.0, 128.8, 128.1, 127.1, 124.0, 123.4, 119.6, 47.9, 27.0, 21.6.

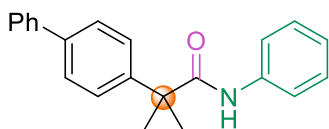

**3y**

**2-([1,1'-biphenyl]-4-yl)-2-methyl-N-phenylpropanamide (3y)** <sup>[1]</sup>

Chromatography Pentane/EA = 15:1 (v/v), 44.2 mg (70%).

<sup>1</sup>H NMR (300 MHz, CDCl<sub>3</sub>) δ 7.61 – 7.49 (m, 4H), 7.47 – 7.34 (m, 4H), 7.33 – 7.25 (m, 3H), 7.24 – 7.12 (m, 2H), 7.04 – 6.92 (m, 1H), 6.80 (s, 1H), 1.62 (s, 6H).

<sup>13</sup>C NMR (75 MHz, CDCl<sub>3</sub>) δ 175.4, 143.5, 140.3, 140.2, 137.9, 128.9, 128.8, 127.6, 127.5, 127.0, 126.9, 124.2, 119.7, 47.8, 27.0.

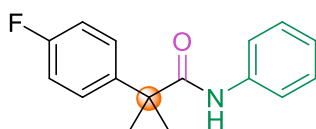

**3z**

**2-(4-fluorophenyl)-2-methyl-N-phenylpropanamide (3z)** <sup>[1]</sup>

Chromatography Pentane/EA = 15:1 (v/v), 48.8 mg (95%).

<sup>1</sup>H NMR (300 MHz, CDCl<sub>3</sub>) δ 7.42 – 7.21 (m, 1H), 7.20 – 7.12 (m, 0H), 7.08 – 6.91 (m, 1H), 6.75 (s, 0H), 1.56 (s, 1H).

<sup>13</sup>C NMR (75 MHz, CDCl<sub>3</sub>) δ 175.1, 161.8 (d, *J* = 246.7 Hz), 140.4 (d, *J* = 3.3 Hz), 137.8, 128.8, 128.1 (d, *J* = 8.0 Hz), 124.2, 119.7, 115.7 (d, *J* = 21.3 Hz), 47.5, 27.1.

<sup>19</sup>F NMR (282 MHz, CDCl<sub>3</sub>) δ -114.99 – -115.21 (m).

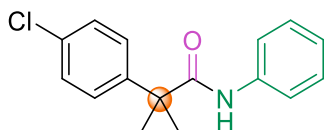

**3aa**

**2-(4-chlorophenyl)-2-methyl-N-phenylpropanamide (3aa)** <sup>[1]</sup>

Chromatography Pentane/EA = 15:1 (v/v), 50.5 mg (92%).

<sup>1</sup>H NMR (300 MHz, CDCl<sub>3</sub>) δ 7.34 – 7.24 (m, 6H), 7.22 – 7.14 (m, 2H), 7.05 – 6.92 (m, 1H), 6.75 (s, 1H), 1.55 (s, 6H).

<sup>13</sup>C NMR (75 MHz, CDCl<sub>3</sub>) δ 174.8, 143.1, 137.7, 133.2, 129.0, 128.8, 127.8, 124.3, 119.7, 47.6, 26.9.

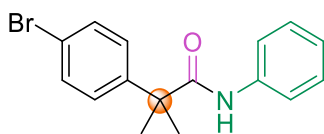

**3ab**

**2-(4-bromophenyl)-2-methyl-N-phenylpropanamide (3ab) <sup>[1]</sup>**

Chromatography Pentane/EA = 15:1 (v/v), 51.8 mg (82%).

<sup>1</sup>H NMR (300 MHz, CDCl<sub>3</sub>) δ 7.48 – 7.36 (m, 2H), 7.33 – 7.11 (m, 6H), 7.05 – 6.92 (m, 1H), 6.75 (s, 1H), 1.54 (s, 6H).

<sup>13</sup>C NMR (75 MHz, CDCl<sub>3</sub>) δ 174.7, 143.7, 137.7, 132.0, 128.8, 128.2, 124.3, 121.3, 119.7, 47.7, 26.9.

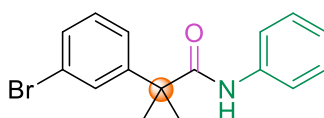

**3ac**

**2-(3-bromophenyl)-2-methyl-N-phenylpropanamide (3ac) <sup>[1]</sup>**

Chromatography Pentane/EA = 15:1 (v/v), 39.4 mg (62%).

<sup>1</sup>H NMR (300 MHz, CDCl<sub>3</sub>) δ 7.55 – 7.47 (m, 1H), 7.42 – 7.32 (m, 1H), 7.32 – 7.25 (m, 3H), 7.23 – 7.14 (m, 3H), 7.05 – 6.94 (m, 1H), 6.73 (s, 1H), 1.56 (s, 6H).

<sup>13</sup>C NMR (75 MHz, CDCl<sub>3</sub>) δ 174.6, 147.1, 137.8, 130.6, 129.4, 129.0, 125.4, 124.4, 123.2, 119.9, 48.0, 27.0.

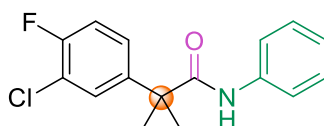

**3ad**

**2-(3-chloro-4-fluorophenyl)-2-methyl-N-phenylpropanamide (3ad)**

Chromatography Pentane/EA = 15:1 (v/v), 41.6 mg (71%).

<sup>1</sup>H NMR (300 MHz, CDCl<sub>3</sub>) δ 7.39 (dd, *J* = 6.9, 2.4 Hz, 0H), 7.33 – 7.26 (m, 0H), 7.24 – 7.16 (m, 1H), 7.12 – 6.93 (m, 0H), 6.82 – 6.73 (m, 0H), 1.56 (s, 1H).

<sup>13</sup>C NMR (75 MHz, CDCl<sub>3</sub>) δ 174.3, 157.2 (d, *J* = 249.5 Hz), 141.9 (d, *J* = 4.0 Hz), 137.6, 128.9, 128.6, 126.4 (d, *J* = 7.1 Hz), 124.4, 121.3 (d, *J* = 17.8 Hz), 119.8, 117.0 (d, *J* = 21.1 Hz), 47.4, 27.0.

<sup>19</sup>F NMR (282 MHz, CDCl<sub>3</sub>) δ -107.73 – -125.80 (m).

HRMS (ES-TOF): *m/z* calcd. for C<sub>16</sub>H<sub>15</sub>ClFNONa<sup>+</sup> [*M*+Na<sup>+</sup>] 314.0718, found 314.0717.

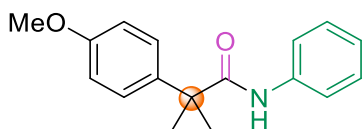

**3ae**

**2-(4-methoxyphenyl)-2-methyl-N-phenylpropanamide (3ae) <sup>[1]</sup>**

Chromatography Pentane/EA = 10:1 (v/v), 21.6 mg (40%).

<sup>1</sup>H NMR (300 MHz, CDCl<sub>3</sub>) δ 7.34 – 7.24 (m, 4H), 7.21 – 7.13 (m, 2H), 7.03 – 6.91 (m, 1H), 6.91 – 6.81 (m, 2H), 6.76 (s, 1H), 3.75 (s, 3H), 1.57 (s, 6H).

<sup>13</sup>C NMR (75 MHz, CDCl<sub>3</sub>) δ 175.9, 158.7, 138.0, 136.5, 128.8, 127.7, 124.0, 119.5, 114.3, 55.3, 47.4, 27.1.

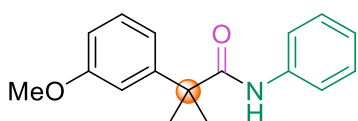

**3af**

**2-(3-methoxyphenyl)-2-methyl-N-phenylpropanamide (3af) <sup>[1]</sup>**

Chromatography Pentane/EA = 10:1 (v/v), 41.7 mg (77%).

<sup>1</sup>H NMR (300 MHz, CDCl<sub>3</sub>) δ 7.33 – 7.10 (m, 2H), 7.02 – 6.86 (m, 1H), 6.82 – 6.72 (m, 1H), 3.73 (s, 1H), 1.57 (s, 2H).

<sup>13</sup>C NMR (75 MHz, CDCl<sub>3</sub>) δ 175.3, 159.9, 146.2, 137.9, 130.0, 128.8, 124.0, 119.6, 118.8, 112.8, 112.1, 55.2, 48.0, 26.9.

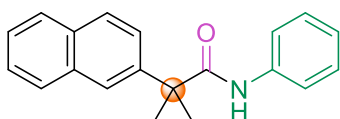

**3ag**

**2-methyl-2-(naphthalen-2-yl)-N-phenylpropanamide (3ag) <sup>[1]</sup>**

Chromatography Pentane/EA = 10:1 (v/v), 36.4 mg (63%).

<sup>1</sup>H NMR (300 MHz, CDCl<sub>3</sub>) δ 7.89 – 7.70 (m, 4H), 7.50 – 7.35 (m, 3H), 7.29 – 7.19 (m, 2H), 7.18 – 7.06 (m, 2H), 7.00 – 6.86 (m, 1H), 6.74 (s, 1H), 1.67 (s, 6H).

<sup>13</sup>C NMR (75 MHz, CDCl<sub>3</sub>) δ 175.4, 142.0, 137.9, 133.3, 132.4, 128.8, 128.0, 127.6, 126.5, 126.3, 125.3, 124.5, 124.1, 119.6, 48.2, 26.9.

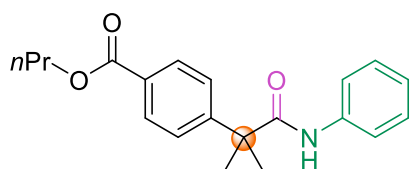

**3ah**

**propyl 4-(2-methyl-1-oxo-1-(phenylamino)propan-2-yl)benzoate (3ah)**

Chromatography Pentane/EA = 6:1 (v/v), 30.1 mg (46%).

<sup>1</sup>H NMR (300 MHz, CDCl<sub>3</sub>) δ 8.04 – 7.94 (m, 1H), 7.50 – 7.39 (m, 1H), 7.33 – 7.25 (m, 1H), 7.23 – 7.14 (m, 1H), 7.05 – 6.93 (m, 0H), 6.70 (s, 1H), 4.21 (t, *J* = 6.6 Hz, 1H), 1.79 – 1.66 (m, 1H), 1.61 (s, 3H), 0.96 (t, *J* = 7.4 Hz, 1H).

<sup>13</sup>C NMR (75 MHz, CDCl<sub>3</sub>) δ 174.6, 166.2, 149.7, 137.7, 130.1, 129.6, 128.9, 126.4, 124.3, 119.7, 66.6, 48.3, 26.9, 22.1, 10.5.

HRMS (ES-TOF): *m/z* calcd. for C<sub>20</sub>H<sub>23</sub>NO<sub>3</sub>Na<sup>+</sup> [*M*+Na<sup>+</sup>] 348.1570, found 348.1578.

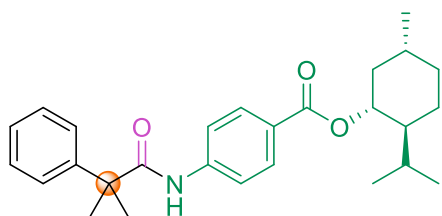

**5**

**(1*R*,2*S*,5*R*)-2-isopropyl-5-methylcyclohexyl 4-(2-methyl-2-phenylpropanamido)benzoate (5)**

Chromatography Pentane/EA = 10:1 (v/v), 73.8 mg (88%).

<sup>1</sup>H NMR (300 MHz, CDCl<sub>3</sub>) δ 8.01 – 7.89 (m, 2H), 7.65 – 7.32 (m, 7H), 7.03 (s, 1H), 4.98 – 4.84 (m, 1H), 2.18 – 2.04 (m, 1H), 2.02 – 1.85 (m, 1H), 1.77 – 1.66 (s, 8H), 1.59 – 1.47 (m, 2H), 1.20 – 1.03 (m, 2H), 0.99 – 0.83 (m, 7H), 0.79 (d, *J* = 7.0 Hz, 3H).

<sup>13</sup>C NMR (75 MHz, CDCl<sub>3</sub>) δ 175.7, 165.5, 144.1, 141.9, 130.6, 129.0, 127.5, 126.3, 126.1, 118.6, 74.6, 48.2, 47.2, 40.9, 34.2, 31.4, 26.9, 26.5, 23.7, 22.0, 20.6, 16.5.

HRMS (ES-TOF): *m/z* calcd. for C<sub>27</sub>H<sub>35</sub>NO<sub>3</sub>Na<sup>+</sup> [*M*+Na<sup>+</sup>] 444.2509, found 444.2515.

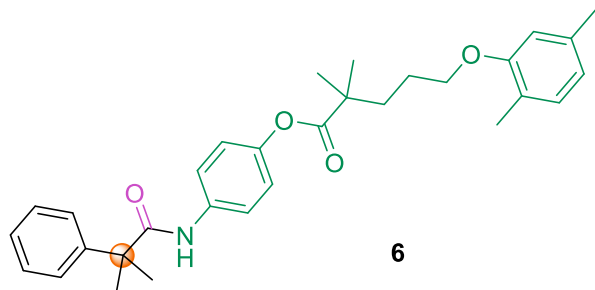

**6**

**4-(2-methyl-2-phenylpropanamido)phenyl 5-(2,5-dimethylphenoxy)-2,2-dimethylpentanoate (6)**

Chromatography Pentane/EA = 8:1 (v/v), 78.5 mg (81%).

<sup>1</sup>H NMR (300 MHz, CDCl<sub>3</sub>) δ 7.53 – 7.30 (m, 7H), 7.04 (dd, *J* = 7.4, 0.9 Hz, 1H), 7.00 – 6.88 (m, 3H), 6.76 – 6.63 (m, 2H), 4.09 – 3.95 (m, 2H), 2.35 (s, 3H), 2.22 (s, 3H), 1.91 (d, *J* = 2.9 Hz, 4H), 1.71 (s, 6H), 1.40 (s, 6H).

$^{13}\text{C}$  NMR (75 MHz,  $\text{CDCl}_3$ )  $\delta$  176.4, 175.5, 156.8, 147.0, 144.5, 136.4, 135.5, 130.3, 128.9, 127.3, 126.4, 123.5, 121.7, 120.7, 120.5, 111.9, 67.7, 47.9, 42.3, 37.0, 26.9, 25.2, 25.1, 21.3, 15.7.

HRMS (ES-TOF):  $m/z$  calcd. for  $\text{C}_{31}\text{H}_{37}\text{NO}_4\text{Na}^+$  [ $\text{M}+\text{Na}^+$ ] 510.2614, found 510.2619.

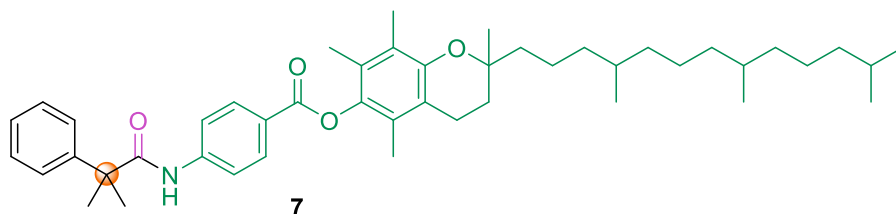

### 2,5,7,8-tetramethyl-2-(4,8,12-trimethyltridecyl)chroman-6-yl 4-(2-methyl-2-phenylpropanamido)benzoate (7)

Chromatography Pentane/EA = 10:1 (v/v), 110.0 mg (79%).

$^1\text{H}$  NMR (300 MHz,  $\text{CDCl}_3$ )  $\delta$  8.20 – 8.12 (m, 2H), 7.59 – 7.30 (m, 7H), 7.07 (s, 1H), 2.63 (t,  $J$  = 6.8 Hz, 2H), 2.14 (s, 3H), 2.03 (d,  $J$  = 12.8 Hz, 6H), 1.82 (q,  $J$  = 8.1 Hz, 2H), 1.71 (s, 6H), 1.63 – 1.05 (m, 24H), 0.96 – 0.82 (m, 12H).

$^{13}\text{C}$  NMR (75 MHz,  $\text{CDCl}_3$ )  $\delta$  175.8, 164.6, 149.4, 144.1, 142.6, 140.5, 131.3, 129.1, 127.6, 126.8, 126.3, 125.1, 124.8, 123.0, 118.8, 117.4, 75.0, 48.3, 39.3, 37.4, 37.3, 37.2, 32.7, 32.6, 27.9, 26.9, 24.8, 24.4, 22.7, 22.6, 21.0, 20.6, 19.7, 19.6, 19.6, 19.6, 19.6, 13.0, 12.1, 11.8.

HRMS (ES-TOF):  $m/z$  calcd. for  $\text{C}_{46}\text{H}_{65}\text{NO}_4\text{Na}^+$  [ $\text{M}+\text{Na}^+$ ] 718.4805, found 718.4818.

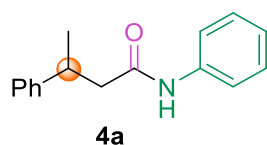

### N,3-diphenylbutanamide (4a)

Chromatography Pentane/EA = 8:1 (v/v), 46.7 mg (98%).

$^1\text{H}$  NMR (300 MHz,  $\text{CDCl}_3$ )  $\delta$  7.57 – 7.47 (m, 1H), 7.33 – 7.22 (m, 2H), 7.21 – 7.05 (m, 7H), 7.02 – 6.91 (m, 1H), 3.26 (h,  $J$  = 7.1 Hz, 1H), 2.60 – 2.39 (m, 2H), 1.24 (d,  $J$  = 7.0 Hz, 3H).

$^{13}\text{C}$  NMR (75 MHz,  $\text{CDCl}_3$ )  $\delta$  170.4, 145.6, 137.7, 128.8, 128.6, 126.7, 126.5, 124.2, 120.1, 46.4, 36.9, 21.6.

HRMS (ES-TOF):  $m/z$  calcd. for  $\text{C}_{16}\text{H}_{17}\text{NONa}^+$  [ $\text{M}+\text{Na}^+$ ] 262.1202, found 262.1203.

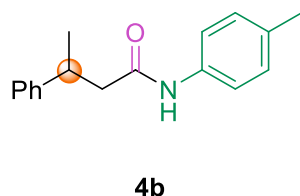

### 3-phenyl-N-(p-tolyl)butanamide (4b)<sup>[2]</sup>

Chromatography Pentane/EA = 10:1 (v/v), 47.6 mg (94%).

$^1\text{H}$  NMR (300 MHz,  $\text{CDCl}_3$ )  $\delta$  7.49 – 7.43 (m, 1H), 7.39 – 7.19 (m, 7H), 7.08 (d,  $J$  = 8.1 Hz, 2H), 3.39 (h,  $J$  = 7.1 Hz, 1H), 2.71 – 2.51 (m, 2H), 2.32 (s, 3H), 1.38 (d,  $J$  = 7.0 Hz, 3H).

$^{13}\text{C}$  NMR (75 MHz,  $\text{CDCl}_3$ )  $\delta$  170.2, 145.7, 135.1, 133.8, 129.2, 128.6, 126.7, 126.4, 120.3, 46.3, 36.9, 21.5, 20.8.

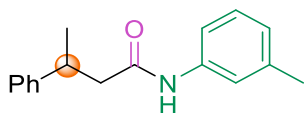

**4c**

**3-phenyl-*N*-(*m*-tolyl)butanamide (4c)**

Chromatography Pentane/EA = 8:1 (v/v), 43.4 mg (86%).

$^1\text{H}$  NMR (300 MHz,  $\text{CDCl}_3$ )  $\delta$  7.51 (s, 1H), 7.41 – 7.22 (m, 6H), 7.20 – 7.13 (m, 2H), 6.97 – 6.86 (m, 1H), 3.40 (h,  $J$  = 7.1 Hz, 1H), 2.73 – 2.52 (m, 2H), 2.31 (s, 3H), 1.38 (d,  $J$  = 7.0 Hz, 3H).

$^{13}\text{C}$  NMR (75 MHz,  $\text{CDCl}_3$ )  $\delta$  170.2, 145.6, 138.7, 137.6, 128.6, 126.7, 126.5, 125.0, 120.8, 117.2, 46.4, 36.9, 21.3.

HRMS (ES-TOF):  $m/z$  calcd. for  $\text{C}_{17}\text{H}_{19}\text{NONa}^+$  [ $\text{M}+\text{Na}^+$ ] 276.1359, found 276.1356.

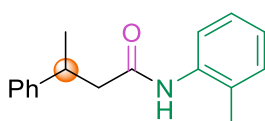

**4d**

**3-phenyl-*N*-(*o*-tolyl)butanamide (4d)**

Chromatography Pentane/EA = 8:1 (v/v), 39.7 mg (78%).

$^1\text{H}$  NMR (300 MHz,  $\text{CDCl}_3$ )  $\delta$  7.60 (d,  $J$  = 7.9 Hz, 1H), 7.41 – 7.21 (m, 5H), 7.21 – 6.99 (m, 4H), 3.39 (h,  $J$  = 7.1 Hz, 1H), 2.76 – 2.57 (m, 2H), 1.98 (s, 3H), 1.40 (d,  $J$  = 7.0 Hz, 3H).

$^{13}\text{C}$  NMR (75 MHz,  $\text{CDCl}_3$ )  $\delta$  170.1, 145.5, 135.4, 130.3, 129.7, 128.7, 126.8, 126.5, 126.4, 125.3, 123.6, 46.3, 37.2, 22.0, 17.4.

HRMS (ES-TOF):  $m/z$  calcd. for  $\text{C}_{17}\text{H}_{19}\text{NONa}^+$  [ $\text{M}+\text{Na}^+$ ] 276.1359, found 276.1364.

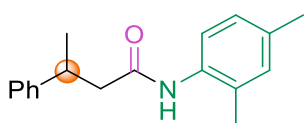

**4e**

***N*-(2,4-dimethylphenyl)-3-phenylbutanamide (4e)**

Chromatography Pentane/EA = 8:1 (v/v), 45.0 mg (84%).

$^1\text{H}$  NMR (300 MHz,  $\text{CDCl}_3$ )  $\delta$  7.32 – 7.06 (m, 6H), 6.83 (d,  $J$  = 7.9 Hz, 3H), 3.26 (h,  $J$  = 7.2 Hz, 1H), 2.64 – 2.43 (m, 2H), 2.16 (s, 3H), 1.82 (s, 3H), 1.27 (d,  $J$  = 7.0 Hz, 3H).

$^{13}\text{C}$  NMR (75 MHz,  $\text{CDCl}_3$ )  $\delta$  170.2, 145.6, 135.0, 132.7, 130.9, 130.1, 128.7, 127.0, 126.8, 126.5, 123.9, 46.2, 37.2, 22.0, 20.8, 17.3.

HRMS (ES-TOF):  $m/z$  calcd. for  $\text{C}_{18}\text{H}_{21}\text{NONa}^+$  [ $\text{M}+\text{Na}^+$ ] 290.1515, found 290.1522.



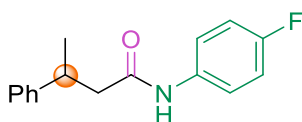

**4f**

***N*-(4-fluorophenyl)-3-phenylbutanamide (4f)**

Chromatography Pentane/EA = 8:1 (v/v), 48.3 mg (94%).

$^1\text{H}$  NMR (300 MHz,  $\text{CDCl}_3$ )  $\delta$  7.32 – 7.05 (m, 8H), 6.90 – 6.76 (m, 2H), 3.26 (h,  $J$  = 7.1 Hz, 1H), 2.59 – 2.40 (m, 2H), 1.26 (d,  $J$  = 7.0 Hz, 3H).

$^{13}\text{C}$  NMR (75 MHz,  $\text{CDCl}_3$ )  $\delta$  170.2, 159.3 (d,  $J$  = 243.5 Hz), 145.5, 133.6 (d,  $J$  = 2.8 Hz), 128.7, 126.7, 126.6, 122.0 (d,  $J$  = 8.0 Hz), 115.4 (d,  $J$  = 22.4 Hz), 46.4, 37.0, 21.6.

$^{19}\text{F}$  NMR (282 MHz,  $\text{CDCl}_3$ )  $\delta$  -117.77 – -118.01 (m).

HRMS (ES-TOF):  $m/z$  calcd. for  $\text{C}_{16}\text{H}_{16}\text{FNONa}^+$  [ $\text{M}+\text{Na}^+$ ] 280.1108, found 280.1114.

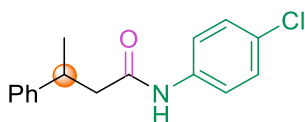

**4g**

***N*-(4-chlorophenyl)-3-phenylbutanamide (4g)**

Chromatography Pentane/EA = 8:1 (v/v), 49.7 mg (91%).

$^1\text{H}$  NMR (300 MHz,  $\text{CDCl}_3$ )  $\delta$  7.44 – 6.53 (m, 10H), 3.26 (h,  $J$  = 7.1 Hz, 1H), 2.60 – 2.41 (m, 2H), 1.27 (d,  $J$  = 6.9 Hz, 3H).

$^{13}\text{C}$  NMR (75 MHz,  $\text{CDCl}_3$ )  $\delta$  170.2, 145.4, 136.1, 129.2, 128.8, 128.7, 126.7, 126.7, 121.3, 46.5, 37.0, 21.6.

HRMS (ES-TOF):  $m/z$  calcd. for  $\text{C}_{16}\text{H}_{16}\text{ClNONa}^+$  [ $\text{M}+\text{Na}^+$ ] 296.0812, found 296.0820.

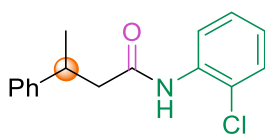

**4h**

***N*-(2-chlorophenyl)-3-phenylbutanamide (4h)**

Chromatography Pentane/EA = 8:1 (v/v), 50.6 mg (93%).

$^1\text{H}$  NMR (400 MHz,  $\text{CDCl}_3$ )  $\delta$  8.34 (d,  $J$  = 8.3 Hz, 1H), 7.51 (s, 1H), 7.43 – 7.21 (m, 7H), 7.08 – 6.99 (m, 1H), 3.43 (h,  $J$  = 7.1 Hz, 1H), 2.76 – 2.63 (m, 2H), 1.42 (d,  $J$  = 6.9 Hz, 3H).

$^{13}\text{C}$  NMR (101 MHz,  $\text{CDCl}_3$ )  $\delta$  169.9, 145.3, 134.4, 128.8, 128.7, 127.5, 126.7, 126.6, 124.5, 121.7, 46.7, 36.9, 21.8.

HRMS (ES-TOF):  $m/z$  calcd. for  $\text{C}_{16}\text{H}_{16}\text{ClNONa}^+$  [ $\text{M}+\text{Na}^+$ ] 296.0812, found 296.0817.

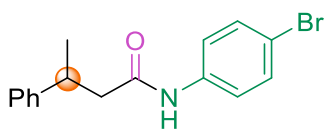

**4i**

***N*-(4-bromophenyl)-3-phenylbutanamide (4ai)**

Chromatography Pentane/EA = 10:1 (v/v), 60.5 mg (95%).

$^1\text{H}$  NMR (300 MHz,  $\text{CDCl}_3$ )  $\delta$  7.32 – 7.20 (m, 4H), 7.21 – 7.09 (m, 5H), 6.98 (s, 1H), 3.27 (h,  $J = 7.1$  Hz, 1H), 2.61 – 2.42 (m, 2H), 1.28 (d,  $J = 7.0$  Hz, 3H).

$^{13}\text{C}$  NMR (75 MHz,  $\text{CDCl}_3$ )  $\delta$  170.1, 145.4, 136.6, 131.8, 128.8, 126.7, 126.7, 121.5, 116.8, 46.7, 37.0, 21.7.

HRMS (ES-TOF):  $m/z$  calcd. for  $\text{C}_{16}\text{H}_{16}\text{BrNONa}^+ [\text{M}+\text{Na}^+]$  340.0307, found 340.0315.

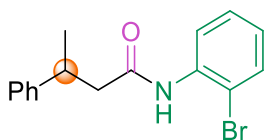

**4j**

***N*-(4-bromophenyl)-3-phenylbutanamide (4j)**

Chromatography Pentane/EA = 8:1 (v/v), 57.0 mg (90%).

$^1\text{H}$  NMR (300 MHz,  $\text{CDCl}_3$ )  $\delta$  8.23 – 8.14 (m, 1H), 7.43 – 7.34 (m, 2H), 7.25 – 7.01 (m, 6H), 6.90 – 6.79 (m, 1H), 3.31 (h, 1H), 2.71 – 2.48 (m, 2H), 1.30 (d,  $J = 7.0$  Hz, 3H).

$^{13}\text{C}$  NMR (75 MHz,  $\text{CDCl}_3$ )  $\delta$  169.9, 145.4, 135.5, 132.1, 128.7, 128.2, 126.7, 126.6, 125.1, 122.0, 113.3, 46.7, 36.9, 21.8.

HRMS (ES-TOF):  $m/z$  calcd. for  $\text{C}_{16}\text{H}_{16}\text{BrNONa}^+ [\text{M}+\text{Na}^+]$  340.0307, found 340.0311.

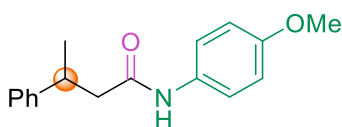

**4k**

***N*-(4-methoxyphenyl)-3-phenylbutanamide (4k)**

Chromatography Pentane/EA = 5:1 (v/v), 51.4 mg (95%).

$^1\text{H}$  NMR (300 MHz,  $\text{CDCl}_3$ )  $\delta$  7.53 – 7.38 (m, 1H), 7.27 – 7.05 (m, 1H), 6.78 – 6.62 (m, 2H), 3.65 (s, 3H), 3.26 (h,  $J = 7.1$  Hz, 1H), 2.57 – 2.38 (m, 2H), 1.24 (d,  $J = 7.0$  Hz, 3H).

$^{13}\text{C}$  NMR (75 MHz,  $\text{CDCl}_3$ )  $\delta$  170.2, 156.3, 145.7, 130.7, 128.6, 126.7, 126.4, 122.1, 113.9, 55.3, 46.2, 37.0, 21.5.

HRMS (ES-TOF):  $m/z$  calcd. for  $\text{C}_{17}\text{H}_{19}\text{NO}_2\text{Na}^+ [\text{M}+\text{Na}^+]$  292.1308, found 292.1316.

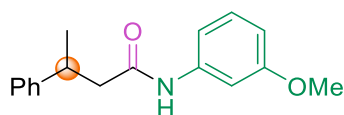

**4l**

***N*-(3-methoxyphenyl)-3-phenylbutanamide (4l)**

Chromatography Pentane/EA = 5:1 (v/v), 47.1 mg (88%).

$^1\text{H}$  NMR (300 MHz,  $\text{CDCl}_3$ )  $\delta$  7.34 (s, 1H), 7.27 – 6.99 (m, 7H), 6.80 – 6.70 (m, 1H), 6.58 – 6.48 (m, 1H), 3.64 (s, 3H), 3.27 (h,  $J = 7.1$  Hz, 1H), 2.60 – 2.40 (m, 2H), 1.25 (d,  $J = 6.9$  Hz, 3H).

$^{13}\text{C}$  NMR (75 MHz,  $\text{CDCl}_3$ )  $\delta$  170.3, 159.9, 145.6, 138.9, 129.5, 128.6, 126.7, 126.5, 112.1, 110.0, 105.7, 55.1, 46.5, 36.9, 21.6.

HRMS (ES-TOF):  $m/z$  calcd. for  $\text{C}_{17}\text{H}_{19}\text{NO}_2\text{Na}^+$  [ $\text{M}+\text{Na}^+$ ] 292.1308, found 292.1310.

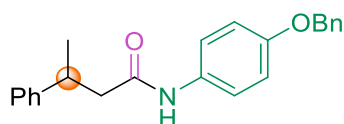

**4m**

***N*-(4-(benzyloxy)phenyl)-3-phenylbutanamide (4m)**

Chromatography Pentane/EA = 5:1 (v/v), 59.7 mg (86%).

$^1\text{H}$  NMR (300 MHz,  $\text{CDCl}_3$ )  $\delta$  7.35 – 7.05 (m, 13H), 6.81 – 6.69 (m, 2H), 4.89 (s, 2H), 3.26 (h,  $J = 7.1$  Hz, 1H), 2.57 – 2.38 (m, 2H), 1.18 (d, 3H).

$^{13}\text{C}$  NMR (75 MHz,  $\text{CDCl}_3$ )  $\delta$  170.2, 155.6, 145.6, 136.9, 130.9, 128.6, 128.5, 127.9, 127.4, 126.8, 126.5, 122.1, 115.0, 70.2, 46.3, 37.0, 21.6.

HRMS (ES-TOF):  $m/z$  calcd. for  $\text{C}_{23}\text{H}_{23}\text{NO}_2\text{Na}^+$  [ $\text{M}+\text{Na}^+$ ] 368.1612, found 368.1621.

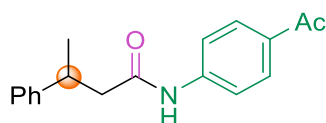

**4n**

***N*-(4-acetylphenyl)-3-phenylbutanamide (4n)**

Chromatography Pentane/EA = 3:1 (v/v), 48.0 mg (85%).

$^1\text{H}$  NMR (300 MHz,  $\text{CDCl}_3$ )  $\delta$  7.89 (s, 1H), 7.82 – 7.72 (m, 2H), 7.47 – 7.37 (m, 2H), 7.26 – 7.06 (m, 5H), 3.29 (h,  $J = 7.1$  Hz, 1H), 2.67 – 2.47 (m, 2H), 2.45 (s, 3H), 1.27 (d,  $J = 7.0$  Hz, 3H).

$^{13}\text{C}$  NMR (75 MHz,  $\text{CDCl}_3$ )  $\delta$  197.3, 170.7, 145.4, 142.3, 132.5, 129.6, 128.7, 126.7, 126.6, 119.0, 46.5, 36.9, 26.4, 21.6.

HRMS (ES-TOF):  $m/z$  calcd. for  $\text{C}_{18}\text{H}_{19}\text{NO}_2\text{Na}^+$  [ $\text{M}+\text{Na}^+$ ] 304.1308, found 304.1316.

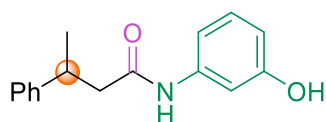

**4o**

**N-(3-hydroxyphenyl)-3-phenylbutanamide (4o)**

Chromatography Pentane/EA = 2:1 (v/v), 20.6 mg (40%).

$^1\text{H}$  NMR (300 MHz,  $\text{CDCl}_3$ )  $\delta$  7.77 (t,  $J$  = 2.2 Hz, 1H), 7.30 – 7.09 (m, 5H), 7.00 (t,  $J$  = 8.1 Hz, 1H), 6.92 (s, 1H), 6.61 – 6.51 (m, 1H), 6.19 – 6.10 (m, 1H), 3.27 (h,  $J$  = 7.1 Hz, 1H), 2.67 – 2.44 (m, 2H), 1.29 (d,  $J$  = 6.9 Hz, 3H).

$^{13}\text{C}$  NMR (75 MHz,  $\text{CDCl}_3$ )  $\delta$  171.2, 157.6, 145.0, 138.2, 129.6, 128.9, 126.8, 126.8, 112.0, 110.4, 107.6, 47.1, 37.2, 21.6.

HRMS (ES-TOF):  $m/z$  calcd. for  $\text{C}_{16}\text{H}_{17}\text{NO}_2\text{Na}^+$  [ $\text{M}+\text{Na}^+$ ] 278.1151, found 278.1156.

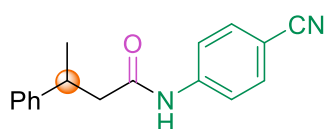

**4p**

**N-(4-cyanophenyl)-3-phenylbutanamide (4p)**

Chromatography Pentane/EA = 3:1 (v/v), 48.8 mg (92%).

$^1\text{H}$  NMR (300 MHz,  $\text{CDCl}_3$ )  $\delta$  7.51 (s, 1H), 7.46 – 7.39 (m, 4H), 7.28 – 7.19 (m, 2H), 7.19 – 7.11 (m, 3H), 3.28 (h,  $J$  = 7.1 Hz, 1H), 2.67 – 2.47 (m, 2H), 1.29 (d,  $J$  = 7.0 Hz, 3H).

$^{13}\text{C}$  NMR (75 MHz,  $\text{CDCl}_3$ )  $\delta$  170.6, 145.2, 141.9, 133.1, 128.8, 126.7, 126.7, 119.5, 118.9, 106.6, 46.6, 36.9, 21.7.

HRMS (ES-TOF):  $m/z$  calcd. for  $\text{C}_{17}\text{H}_{16}\text{N}_2\text{ONa}^+$  [ $\text{M}+\text{Na}^+$ ] 287.1154, found 287.1161.

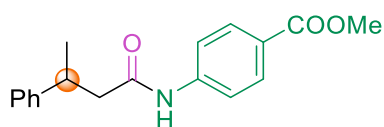

**4q**

**methyl 4-(3-phenylbutanamido)benzoate (4q)**

Chromatography Pentane/EA = 5:1 (v/v), 52.2 mg (88%).

$^1\text{H}$  NMR (300 MHz,  $\text{CDCl}_3$ )  $\delta$  7.90 – 7.81 (m, 2H), 7.71 – 7.60 (m, 1H), 7.43 – 7.33 (m, 2H), 7.27 – 7.06 (m, 5H), 3.78 (s, 3H), 3.28 (h,  $J$  = 7.1 Hz, 1H), 2.65 – 2.44 (m, 2H), 1.26 (d,  $J$  = 7.0 Hz, 3H).

$^{13}\text{C}$  NMR (75 MHz,  $\text{CDCl}_3$ )  $\delta$  170.5, 166.7, 145.3, 142.0, 130.6, 128.7, 126.7, 126.6, 125.3, 118.9, 52.0, 46.5, 36.9, 21.6.

HRMS (ES-TOF):  $m/z$  calcd. for  $\text{C}_{18}\text{H}_{19}\text{NO}_3\text{Na}^+$  [ $\text{M}+\text{Na}^+$ ] 320.1257, found 320.1263.

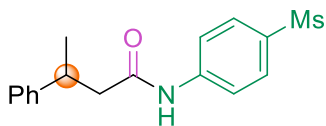

**4r**

***N*-(4-(methylsulfonyl)phenyl)-3-phenylbutanamide (4r)**

Chromatography Pentane/EA = 2:1 (v/v), 48.1 mg (76%).

$^1\text{H}$  NMR (300 MHz,  $\text{CDCl}_3$ )  $\delta$  7.85 – 7.45 (m, 5H), 7.38 – 7.18 (m, 5H), 3.45 – 3.26 (m, 1H), 3.03 (s, 3H), 2.74 – 2.58 (m, 2H), 1.42 – 1.25 (m, 3H).

$^{13}\text{C}$  NMR (75 MHz,  $\text{CDCl}_3$ )  $\delta$  170.7, 145.3, 142.8, 134.8, 128.7, 128.4, 126.7, 126.7, 119.6, 46.5, 44.6, 36.9, 21.7.

HRMS (ES-TOF):  $m/z$  calcd. for  $\text{C}_{17}\text{H}_{19}\text{NO}_3\text{SNa}^+$  [ $\text{M}+\text{Na}^+$ ] 340.0977, found 340.0979.

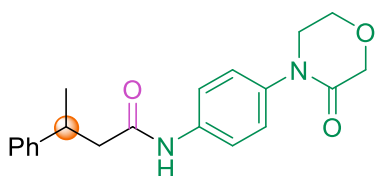

**4s**

***N*-(4-(3-oxomorpholino)phenyl)-3-phenylbutanamide (4s)**

Chromatography Pentane/EA = 2:1 (v/v), 26.6 mg (39%).

$^1\text{H}$  NMR (300 MHz,  $\text{CDCl}_3$ )  $\delta$  8.00 (s, 1H), 7.29 – 7.09 (m, 7H), 6.98 – 6.88 (m, 2H), 4.23 (s, 2H), 3.97 – 3.88 (m, 2H), 3.63 – 3.54 (m, 2H), 3.28 (h,  $J = 7.1$  Hz, 1H), 2.56 – 2.36 (m, 2H), 1.26 (d,  $J = 7.0$  Hz, 3H).

$^{13}\text{C}$  NMR (75 MHz,  $\text{CDCl}_3$ )  $\delta$  170.4, 167.1, 145.9, 137.1, 136.5, 128.6, 126.8, 126.5, 125.9, 121.2, 68.4, 64.0, 49.9, 46.1, 36.8, 21.5.

HRMS (ES-TOF):  $m/z$  calcd. for  $\text{C}_{20}\text{H}_{22}\text{N}_2\text{O}_3\text{Na}^+$  [ $\text{M}+\text{Na}^+$ ] 361.1523, found 361.1519.

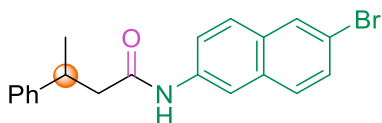

**4t**

***N*-(6-bromonaphthalen-2-yl)-3-phenylbutanamide (4t)**

Chromatography Pentane/EA = 10:1 (v/v), 54.2 mg (74%).

$^1\text{H}$  NMR (300 MHz,  $\text{CDCl}_3$ )  $\delta$  7.92 (d,  $J = 2.2$  Hz, 1H), 7.81 – 7.69 (m, 1H), 7.47 – 7.03 (m, 10H), 3.30 (h,  $J = 7.1$  Hz, 1H), 2.65 – 2.45 (m, 2H), 1.28 (d,  $J = 7.0$  Hz, 3H).

$^{13}\text{C}$  NMR (75 MHz,  $\text{CDCl}_3$ )  $\delta$  170.4, 145.5, 135.4, 132.1, 129.7, 129.4, 129.1, 128.7, 127.6, 126.7, 126.6, 120.9, 119.0, 118.7, 116.7, 46.6, 37.0, 21.7.

HRMS (ES-TOF):  $m/z$  calcd. for  $\text{C}_{20}\text{H}_{18}\text{BrNONa}^+$  [ $\text{M}+\text{Na}^+$ ] 390.0464, found 390.0467.

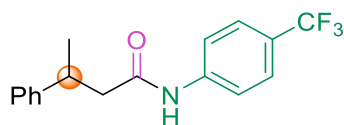

**4u**

**3-phenyl-*N*-(4-(trifluoromethyl)phenyl)butanamide (4u)**

Chromatography Pentane/EA = 10:1 (v/v), 56.9 mg (93%).

$^1\text{H}$  NMR (300 MHz,  $\text{CDCl}_3$ )  $\delta$  7.54 – 7.44 (m, 1H), 7.43 – 7.30 (m, 4H), 7.26 – 7.17 (m, 2H), 7.17 – 7.09 (m, 3H), 3.26 (h,  $J = 7.1$  Hz, 1H), 2.64 – 2.44 (m, 2H), 1.26 (d,  $J = 7.0$  Hz, 3H).

$^{13}\text{C}$  NMR (75 MHz,  $\text{CDCl}_3$ )  $\delta$  170.6, 145.3, 140.6, 128.8, 126.7, 126.7, 126.0 (q,  $J = 3.8$  Hz), 124.0 (q,  $J = 270.0$  Hz), 119.6, 46.6, 37.0, 21.7.

$^{19}\text{F}$  NMR (282 MHz,  $\text{CDCl}_3$ )  $\delta$  -62.11.

HRMS (ES-TOF):  $m/z$  calcd. for  $\text{C}_{17}\text{H}_{16}\text{F}_3\text{NONa}^+$  [ $\text{M}+\text{Na}^+$ ] 330.1076, found 330.1078.

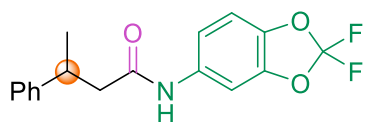

**4v**

***N*-(2,2-difluorobenzo[*d*][1,3]dioxol-5-yl)-3-phenylbutanamide (4v)**

Chromatography Pentane/EA = 5:1 (v/v), 60.2 mg (94%).

$^1\text{H}$  NMR (300 MHz,  $\text{CDCl}_3$ )  $\delta$  7.32 (s, 1H), 7.27 – 7.18 (m, 3H), 7.18 – 7.08 (m, 3H), 6.78 (d,  $J = 8.6$  Hz, 1H), 6.65 (dd,  $J = 8.6, 2.1$  Hz, 1H), 3.26 (h,  $J = 7.1$  Hz, 1H), 2.51 (dd,  $J = 7.4, 1.0$  Hz, 2H), 1.27 (d,  $J = 7.0$  Hz, 3H).

$^{13}\text{C}$  NMR (75 MHz,  $\text{CDCl}_3$ )  $\delta$  170.5, 145.3, 143.6, 140.1, 133.6, 131.7 (t,  $J = 253.5$  Hz), 128.7, 126.7, 126.7, 115.1, 109.0, 103.4, 46.4, 37.1, 21.6.

$^{19}\text{F}$  NMR (282 MHz,  $\text{CDCl}_3$ )  $\delta$  -49.98.

HRMS (ES-TOF):  $m/z$  calcd. for  $\text{C}_{17}\text{H}_{15}\text{F}_2\text{NO}_3\text{Na}^+$  [ $\text{M}+\text{Na}^+$ ] 342.0912, found 342.0916.

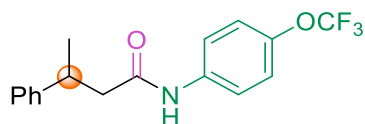

**4w**

**3-phenyl-*N*-(4-(trifluoromethoxy)phenyl)butanamide (4w)**

Chromatography Pentane/EA = 5:1 (v/v), 61.4 mg (95%).

$^1\text{H}$  NMR (300 MHz,  $\text{CDCl}_3$ )  $\delta$  7.44 (s, 1H), 7.32 – 7.07 (m, 7H), 7.04 – 6.93 (m, 2H), 3.26 (h,  $J = 7.1$  Hz, 1H), 2.61 – 2.42 (m, 2H), 1.26 (d,  $J = 7.0$  Hz, 3H).

$^{13}\text{C}$  NMR (75 MHz,  $\text{CDCl}_3$ )  $\delta$  170.4, 145.4, 145.2, 136.2, 128.7, 126.7, 126.7, 121.5, 121.3, 120.4 (q,  $J = 255.0$  Hz), 46.4, 37.0, 21.6.

$^{19}\text{F}$  NMR (282 MHz,  $\text{CDCl}_3$ )  $\delta$  -58.14.

HRMS (ES-TOF):  $m/z$  calcd. for  $\text{C}_{17}\text{H}_{16}\text{F}_3\text{NO}_2\text{Na}^+ [\text{M}+\text{Na}^+]$  346.1025, found 346.1032.

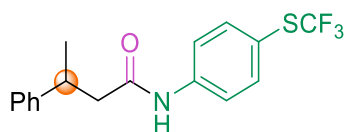

**4x**

### 3-phenyl-*N*-(4-((trifluoromethyl)thio)phenyl)butanamide (4x)

Chromatography Pentane/EA = 5:1 (v/v), 63.1 mg (93%).

$^1\text{H}$  NMR (300 MHz,  $\text{CDCl}_3$ )  $\delta$  7.51 (s, 1H), 7.46 – 7.39 (m, 2H), 7.36 – 7.29 (m, 2H), 7.25 – 7.08 (m, 5H), 3.26 (h,  $J$  = 7.1 Hz, 1H), 2.64 – 2.44 (m, 2H), 1.26 (d,  $J$  = 7.0 Hz, 3H).

$^{13}\text{C}$  NMR (75 MHz,  $\text{CDCl}_3$ )  $\delta$  170.6, 145.3, 140.2, 137.3, 129.5 (q,  $J$  = 306.8 Hz), 128.8, 126.7, 126.7, 120.4, 118.7, 46.5, 36.9, 21.7.

$^{19}\text{F}$  NMR (282 MHz,  $\text{CDCl}_3$ )  $\delta$  -43.25.

HRMS (ES-TOF):  $m/z$  calcd. for  $\text{C}_{17}\text{H}_{16}\text{F}_3\text{NOSNa}^+ [\text{M}+\text{Na}^+]$  362.0797, found 362.0802.

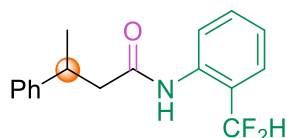

**4y**

### *N*-(2-(difluoromethyl)phenyl)-3-phenylbutanamide (4y)

Chromatography Pentane/EA = 10:1 (v/v), 57.2 mg (99%).

$^1\text{H}$  NMR (300 MHz,  $\text{CDCl}_3$ )  $\delta$  8.27 – 8.18 (m, 1H), 7.33 (s, 1H), 7.28 – 7.01 (m, 6H), 7.00 – 6.90 (m, 2H), 6.28 (t,  $J$  = 73.5 Hz, 1H), 3.29 (h,  $J$  = 7.1 Hz, 1H), 2.68 – 2.46 (m, 2H), 1.28 (d,  $J$  = 7.0 Hz, 3H).

$^{13}\text{C}$  NMR (75 MHz,  $\text{CDCl}_3$ )  $\delta$  170.0, 145.4, 140.0, 129.8, 128.6, 126.7, 126.5, 126.1, 124.1, 121.7, 118.5, 116.2 (t,  $J$  = 259.5 Hz), 46.6, 36.9, 21.8.

$^{19}\text{F}$  NMR (282 MHz,  $\text{CDCl}_3$ )  $\delta$  -79.89 (d,  $J$  = 73.5 Hz).

HRMS (ES-TOF):  $m/z$  calcd. for  $\text{C}_{17}\text{H}_{18}\text{F}_2\text{NO}^+ [\text{M}+\text{H}^+]$  290.1351, found 290.1355.

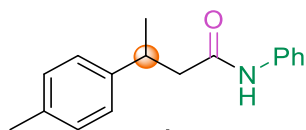

**4z**

### *N*-phenyl-3-(*p*-tolyl)butanamide (4z)

Chromatography Pentane/EA = 10:1 (v/v), 48.5 mg (96%).

$^1\text{H}$  NMR (400 MHz,  $\text{CDCl}_3$ )  $\delta$  7.39 (s, 1H), 7.32 – 7.24 (m, 2H), 7.21 – 7.10 (m, 2H), 7.07 – 6.91 (m, 5H), 3.23 (h,  $J$  = 7.1 Hz, 1H), 2.57 – 2.40 (m, 2H), 2.22 (s, 3H), 1.23 (d,  $J$  = 7.0 Hz, 3H).

$^{13}\text{C}$  NMR (101 MHz,  $\text{CDCl}_3$ )  $\delta$  170.4, 142.6, 137.7, 136.0, 129.3, 128.8, 126.6, 124.2, 120.1, 46.5, 36.5, 21.7, 20.9.

HRMS (ES-TOF):  $m/z$  calcd. for  $\text{C}_{17}\text{H}_{19}\text{NONa}^+ [\text{M}+\text{Na}^+]$  276.1359, found 276.1362.

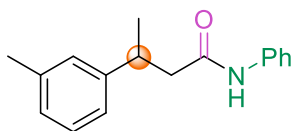

**4aa**

**N-phenyl-3-(*m*-tolyl)butanamide (4aa)**

Chromatography Pentane/EA = 10:1 (v/v), 49.0 mg (97%).

$^1\text{H}$  NMR (400 MHz,  $\text{CDCl}_3$ )  $\delta$  7.35 (s, 1H), 7.31 – 7.23 (m, 2H), 7.18 – 7.07 (m, 3H), 7.02 – 6.89 (m, 4H), 3.23 (h,  $J$  = 7.1 Hz, 1H), 2.58 – 2.41 (m, 2H), 2.21 (d,  $J$  = 0.7 Hz, 3H), 1.24 (d,  $J$  = 7.0 Hz, 3H).

$^{13}\text{C}$  NMR (101 MHz,  $\text{CDCl}_3$ )  $\delta$  170.3, 145.6, 138.2, 137.7, 128.8, 128.5, 127.6, 127.3, 124.2, 123.6, 120.1, 46.5, 36.9, 21.6, 21.4.

HRMS (ES-TOF):  $m/z$  calcd. for  $\text{C}_{17}\text{H}_{19}\text{NONa}^+$  [ $\text{M}+\text{Na}^+$ ] 276.1359, found 276.1363.

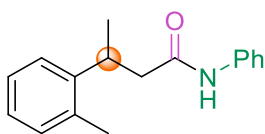

**4ab**

**N-phenyl-3-(*o*-tolyl)butanamide (4ab)**

Chromatography Pentane/EA = 10:1 (v/v), 39.9 mg (79%).

$^1\text{H}$  NMR (300 MHz,  $\text{CDCl}_3$ )  $\delta$  7.48 – 6.63 (m, 10H), 3.64 – 3.46 (m, 1H), 2.61 – 2.38 (m, 2H), 2.26 (s, 3H), 1.22 (d,  $J$  = 6.9 Hz, 3H).

$^{13}\text{C}$  NMR (75 MHz,  $\text{CDCl}_3$ )  $\delta$  170.3, 143.8, 137.7, 135.6, 130.6, 128.8, 126.4, 126.2, 125.0, 124.2, 120.0, 45.8, 31.9, 21.3, 19.4.

HRMS (ES-TOF):  $m/z$  calcd. for  $\text{C}_{17}\text{H}_{19}\text{NONa}^+$  [ $\text{M}+\text{Na}^+$ ] 276.1359, found 276.1364.

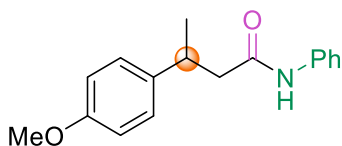

**4ac**

**3-(4-methoxyphenyl)-*N*-phenylbutanamide (4ac)<sup>[3]</sup>**

Chromatography Pentane/EA = 5:1 (v/v), 45.0 mg (84%).

$^1\text{H}$  NMR (300 MHz,  $\text{CDCl}_3$ )  $\delta$  7.35 (s, 1H), 7.31 – 7.25 (m, 2H), 7.20 – 7.12 (m, 2H), 7.09 – 7.03 (m, 2H), 7.01 – 6.94 (m, 1H), 6.79 – 6.70 (m, 2H), 3.68 (s, 3H), 3.23 (h,  $J$  = 7.1 Hz, 1H), 2.57 – 2.38 (m, 2H), 1.23 (d,  $J$  = 7.0 Hz, 3H).

$^{13}\text{C}$  NMR (75 MHz,  $\text{CDCl}_3$ )  $\delta$  170.3, 158.1, 137.6, 128.8, 127.7, 124.2, 120.0, 114.0, 55.2, 46.7, 36.1, 21.8.



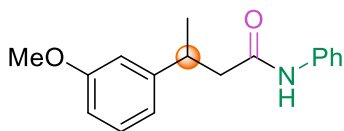

**4ad**

### 3-(3-methoxyphenyl)-*N*-phenylbutanamide (4ad)

Chromatography Pentane/EA = 5:1 (v/v), 52.1 mg (97%).

$^1\text{H}$  NMR (300 MHz,  $\text{CDCl}_3$ )  $\delta$  7.41 (s, 1H), 7.33 – 7.23 (m, 2H), 7.21 – 7.05 (m, 3H), 7.02 – 6.91 (m, 1H), 6.78 – 6.61 (m, 3H), 3.65 (s, 3H), 3.24 (h,  $J = 7.1$  Hz, 1H), 2.59 – 2.38 (m, 2H), 1.24 (d,  $J = 7.0$  Hz, 3H).

$^{13}\text{C}$  NMR (75 MHz,  $\text{CDCl}_3$ )  $\delta$  170.2, 159.7, 147.3, 137.7, 129.6, 128.8, 124.2, 120.1, 119.0, 112.7, 111.6, 55.1, 46.4, 37.0, 21.5.

HRMS (ES-TOF):  $m/z$  calcd. for  $\text{C}_{17}\text{H}_{19}\text{NO}_2\text{Na}^+$  [ $\text{M}+\text{Na}^+$ ] 292.1308, found 292.1316.

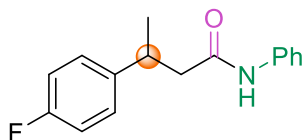

**4ae**

### 3-(4-fluorophenyl)-*N*-phenylbutanamide (4ae)<sup>[4]</sup>

Chromatography Pentane/EA = 10:1 (v/v), 42.8 mg (83%).

$^1\text{H}$  NMR (300 MHz,  $\text{CDCl}_3$ )  $\delta$  7.75 – 6.55 (m, 3H), 3.29 (h,  $J = 7.1$  Hz, 0H), 2.48 (d,  $J = 7.1$  Hz, 0H), 1.25 (d,  $J = 7.0$  Hz, 1H).

$^{13}\text{C}$  NMR (75 MHz,  $\text{CDCl}_3$ )  $\delta$  169.9, 161.4 (d,  $J = 244.5$  Hz), 141.3 (d,  $J = 3.1$  Hz), 137.6, 128.9, 128.2 (d,  $J = 7.8$  Hz), 124.4, 120.0, 115.4 (d,  $J = 21.0$  Hz), 46.7, 36.2, 21.7.

$^{19}\text{F}$  NMR (282 MHz,  $\text{CDCl}_3$ )  $\delta$  -116.35 – -116.63 (m).

HRMS (ES-TOF):  $m/z$  calcd. for  $\text{C}_{16}\text{H}_{15}\text{FNONa}^+$  [ $\text{M}+\text{Na}^+$ ] 314.0718, found 314.0721.

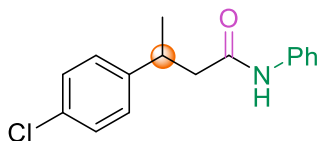

**4af**

### 3-(4-chlorophenyl)-*N*-phenylbutanamide (4af)

Chromatography Pentane/EA = 10:1 (v/v), 48.8 mg (89%).

$^1\text{H}$  NMR (400 MHz,  $\text{CDCl}_3$ )  $\delta$  7.34 – 7.28 (m, 2H), 7.26 – 7.14 (m, 5H), 7.12 – 7.04 (m, 2H), 7.03 – 6.96 (m, 1H), 3.28 (h,  $J = 7.1$  Hz, 1H), 2.54 – 2.40 (m, 2H), 1.24 (d,  $J = 7.0$  Hz, 3H).

$^{13}\text{C}$  NMR (101 MHz,  $\text{CDCl}_3$ )  $\delta$  169.7, 144.1, 137.5, 132.1, 128.9, 128.7, 128.1, 124.4, 120.0, 46.4, 36.3, 21.5.

HRMS (ES-TOF):  $m/z$  calcd. for  $\text{C}_{16}\text{H}_{16}\text{ClNONa}^+$  [ $\text{M}+\text{Na}^+$ ] 296.0812, found 296.0817.

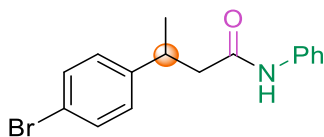

**4ag**

**3-(4-bromophenyl)-N-phenylbutanamide (4ag)**

Chromatography Pentane/EA = 10:1 (v/v), 58.3 mg (92%).

$^1\text{H}$  NMR (300 MHz,  $\text{CDCl}_3$ )  $\delta$  7.44 – 7.13 (m, 7H), 7.08 – 6.92 (m, 3H), 3.26 (h,  $J$  = 7.1 Hz, 1H), 2.55 – 2.37 (m, 2H), 1.22 (d,  $J$  = 7.0 Hz, 3H).

$^{13}\text{C}$  NMR (75 MHz,  $\text{CDCl}_3$ )  $\delta$  169.8, 144.6, 137.5, 131.6, 128.9, 128.5, 124.4, 120.1, 46.2, 36.3, 21.4.

HRMS (ES-TOF):  $m/z$  calcd. for  $\text{C}_{16}\text{H}_{16}\text{BrNONa}^+$  [ $\text{M}+\text{Na}^+$ ] 340.0307, found 340.0310.

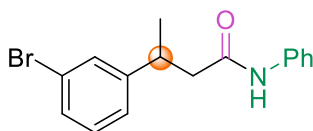

**4ah**

**3-(3-bromophenyl)-N-phenylbutanamide (4ah)**

Chromatography Pentane/EA = 10:1 (v/v), 48.6 mg (77%).

$^1\text{H}$  NMR (300 MHz,  $\text{CDCl}_3$ )  $\delta$  7.47 (s, 1H), 7.37 – 7.12 (m, 6H), 7.11 – 6.93 (m, 3H), 3.25 (h,  $J$  = 7.1 Hz, 1H), 2.56 – 2.36 (m, 2H), 1.22 (d,  $J$  = 7.0 Hz, 3H).

$^{13}\text{C}$  NMR (75 MHz,  $\text{CDCl}_3$ )  $\delta$  169.8, 148.1, 137.5, 130.2, 129.7, 129.6, 128.9, 125.7, 124.4, 122.6, 120.2, 46.0, 36.5, 21.4.

HRMS (ES-TOF):  $m/z$  calcd. for  $\text{C}_{16}\text{H}_{16}\text{BrNONa}^+$  [ $\text{M}+\text{Na}^+$ ] 340.0307, found 340.0313.

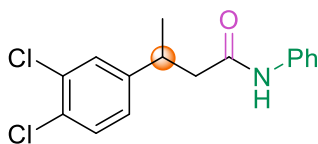

**4ai**

**phenylbutanamide (4ai)**

Chromatography Pentane/EA = 10:1 (v/v), 49.2 mg (80%).

$^1\text{H}$  NMR (300 MHz,  $\text{CDCl}_3$ )  $\delta$  7.55 (s, 1H), 7.38 – 7.29 (m, 2H), 7.27 – 7.11 (m, 4H), 7.07 – 6.89 (m, 2H), 3.25 (h,  $J$  = 7.1 Hz, 1H), 2.53 – 2.34 (m, 2H), 1.20 (d,  $J$  = 7.0 Hz, 3H).

$^{13}\text{C}$  NMR (75 MHz,  $\text{CDCl}_3$ )  $\delta$  169.6, 146.0, 137.4, 132.4, 130.4, 130.2, 128.9, 128.6, 126.4, 124.6, 120.2, 45.8, 36.0, 21.3.

HRMS (ES-TOF):  $m/z$  calcd. for  $\text{C}_{16}\text{H}_{15}\text{Cl}_2\text{NONa}^+$  [ $\text{M}+\text{Na}^+$ ] 330.0423, found 330.0426.

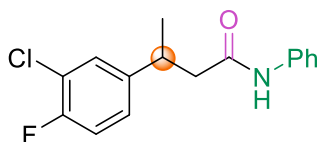

**4aj**

**3-(3-chloro-4-fluorophenyl)-N-phenylbutanamide (4aj)**

Chromatography Pentane/EA = 10:1 (v/v), 50.8 mg (87%).

$^1\text{H}$  NMR (300 MHz,  $\text{CDCl}_3$ )  $\delta$  7.52 (s, 1H), 7.38 – 7.27 (m, 2H), 7.25 – 7.10 (m, 3H), 7.06 – 6.87 (m, 3H), 3.26 (h,  $J$  = 7.1 Hz, 1H), 2.54 – 2.35 (m, 2H), 1.21 (d,  $J$  = 7.0 Hz, 3H).

$^{13}\text{C}$  NMR (75 MHz,  $\text{CDCl}_3$ )  $\delta$  169.7, 156.6 (d,  $J$  = 247.3 Hz), 142.7 (d,  $J$  = 4.0 Hz), 137.5, 128.9, 128.7, 126.6 (d,  $J$  = 6.9 Hz), 124.5, 120.7 (d,  $J$  = 17.6 Hz), 120.2, 116.5 (d,  $J$  = 20.8 Hz), 46.1, 35.9, 21.5.

$^{19}\text{F}$  NMR (282 MHz,  $\text{CDCl}_3$ )  $\delta$  -118.67 – -118.87 (m).

HRMS (ES-TOF):  $m/z$  calcd. for  $\text{C}_{16}\text{H}_{16}\text{ClFNO}^+$  [ $\text{M}+\text{H}^+$ ] 292.0899, found 292.0901.

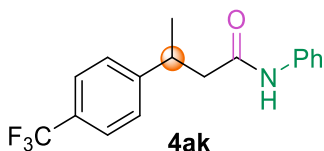

**4ak**

**N-phenyl-3-(4-(trifluoromethyl)phenyl)butanamide (4ak)**

Chromatography Pentane/EA = 10:1 (v/v), 25.4 mg (41%).

$^1\text{H}$  NMR (300 MHz,  $\text{CDCl}_3$ )  $\delta$  7.60 – 7.14 (m, 9H), 7.07 – 6.95 (m, 1H), 3.39 (h,  $J$  = 7.1 Hz, 1H), 2.52 (dd,  $J$  = 7.4, 2.3 Hz, 2H), 1.28 (d,  $J$  = 7.0 Hz, 3H).

$^{13}\text{C}$  NMR (75 MHz,  $\text{CDCl}_3$ )  $\delta$  169.5, 149.8, 137.5, 129.0, 127.2, 125.5 (q,  $J$  = 3.5 Hz), 124.5, 124.2 (q,  $J$  = 270.0 Hz), 120.0, 46.1, 36.6, 21.3.

$^{19}\text{F}$  NMR (282 MHz,  $\text{CDCl}_3$ )  $\delta$  -62.37.

HRMS (ES-TOF):  $m/z$  calcd. for  $\text{C}_{17}\text{H}_{16}\text{F}_3\text{NONa}^+$  [ $\text{M}+\text{Na}^+$ ] 330.1076, found 330.1084.

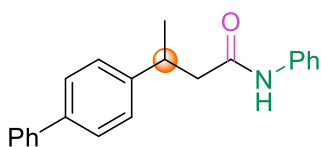

**4al**

**3-([1,1'-biphenyl]-4-yl)-N-phenylbutanamide (4al)**

Chromatography Pentane/EA = 10:1 (v/v), 55.3 mg (88%).

$^1\text{H}$  NMR (300 MHz,  $\text{CDCl}_3$ )  $\delta$  7.53 – 7.40 (m, 4H), 7.39 – 7.12 (m, 10H), 7.04 – 6.92 (m, 1H), 3.34 (h,  $J$  = 7.1 Hz, 1H), 2.64 – 2.44 (m, 2H), 1.31 (d,  $J$  = 6.9 Hz, 3H).

$^{13}\text{C}$  NMR (75 MHz,  $\text{CDCl}_3$ )  $\delta$  170.1, 144.7, 140.8, 139.5, 137.6, 128.9, 128.7, 127.4, 127.2, 127.1, 126.9, 124.3, 120.0, 46.6, 36.6, 21.6.

HRMS (ES-TOF):  $m/z$  calcd. for  $\text{C}_{22}\text{H}_{21}\text{NONa}^+$  [ $\text{M}+\text{Na}^+$ ] 338.1515, found 338.1518.

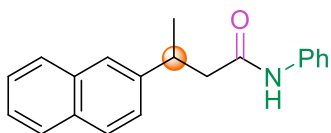

**4am**

**3-(naphthalen-2-yl)-*N*-phenylbutanamide (4am)**

Chromatography Pentane/EA = 10:1 (v/v), 55.5 mg (96%).

$^1\text{H}$  NMR (400 MHz,  $\text{CDCl}_3$ )  $\delta$  7.73 – 7.59 (m, 3H), 7.54 (d,  $J$  = 1.7 Hz, 1H), 7.41 (s, 1H), 7.38 – 7.29 (m, 2H), 7.27 – 7.21 (m, 3H), 7.15 – 7.07 (m, 2H), 6.94 (t,  $J$  = 7.3 Hz, 1H), 3.43 (h,  $J$  = 7.1 Hz, 1H), 2.85 – 2.34 (m, 2H), 1.31 (d,  $J$  = 7.0 Hz, 3H).

$^{13}\text{C}$  NMR (101 MHz,  $\text{CDCl}_3$ )  $\delta$  170.2, 143.0, 137.6, 133.5, 132.3, 128.8, 128.3, 127.6, 127.5, 126.0, 125.4, 125.3, 125.0, 124.3, 120.1, 46.3, 37.0, 21.5.

HRMS (ES-TOF):  $m/z$  calcd. for  $\text{C}_{20}\text{H}_{19}\text{NO}_2\text{Na}^+$  [ $\text{M}+\text{Na}^+$ ] 312.1359, found 312.1356.

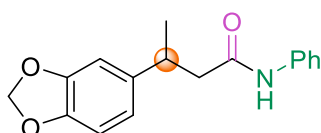

**4an**

**3-(benzo[*d*][1,3]dioxol-5-yl)-*N*-phenylbutanamide (4an)**

Chromatography Pentane/EA = 5:1 (v/v), 44.3 mg (78%).

$^1\text{H}$  NMR (300 MHz,  $\text{CDCl}_3$ )  $\delta$  7.38 (s, 1H), 7.35 – 7.27 (m, 2H), 7.24 – 7.11 (m, 2H), 7.04 – 6.93 (m, 1H), 6.69 – 6.49 (m, 3H), 5.87 – 5.74 (m, 2H), 3.21 (h,  $J$  = 7.1 Hz, 1H), 2.55 – 2.36 (m, 2H), 1.21 (d,  $J$  = 7.0 Hz, 3H).

$^{13}\text{C}$  NMR (75 MHz,  $\text{CDCl}_3$ )  $\delta$  170.1, 147.7, 146.0, 139.6, 137.7, 128.8, 124.3, 120.1, 119.7, 108.3, 107.0, 100.8, 46.6, 36.7, 21.9.

HRMS (ES-TOF):  $m/z$  calcd. for  $\text{C}_{17}\text{H}_{17}\text{NO}_3\text{Na}^+$  [ $\text{M}+\text{Na}^+$ ] 306.1100, found 306.1102.

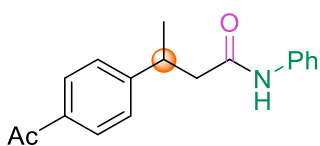

**4ao**

**3-(4-acetylphenyl)-*N*-phenylbutanamide (4ao)**

Chromatography Pentane/EA = 3:1 (v/v), 55.1 mg (98%).

$^1\text{H}$  NMR (300 MHz,  $\text{CDCl}_3$ )  $\delta$  7.95 (s, 1H), 7.81 – 7.70 (m, 2H), 7.44 – 7.31 (m, 2H), 7.25 – 7.10 (m, 4H), 7.04 – 6.89 (m, 1H), 3.37 (h,  $J$  = 7.1 Hz, 1H), 2.54 (dd,  $J$  = 7.4, 4.3 Hz, 2H), 2.47 (s, 3H), 1.24 (d,  $J$  = 7.0 Hz, 3H).

$^{13}\text{C}$  NMR (75 MHz,  $\text{CDCl}_3$ )  $\delta$  198.1, 169.8, 151.6, 137.8, 135.3, 128.8, 128.7, 127.0, 124.2, 120.0, 45.6, 36.7, 26.5, 21.3.

HRMS (ES-TOF):  $m/z$  calcd. for  $\text{C}_{18}\text{H}_{19}\text{NO}_2\text{Na}^+$  [ $\text{M}+\text{Na}^+$ ] 304.1308, found 304.1313.

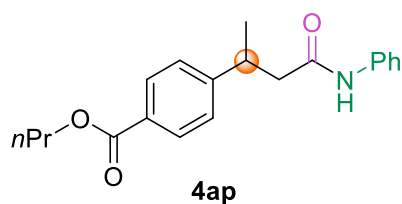

**propyl 4-(4-oxo-4-(phenylamino)butan-2-yl)benzoate (4ap)**

Chromatography Pentane/EA = 5:1 (v/v), 55.0 mg (85%).

$^1\text{H}$  NMR (300 MHz,  $\text{CDCl}_3$ )  $\delta$  7.91 – 7.81 (m, 2H), 7.78 – 7.72 (m, 1H), 7.39 – 7.27 (m, 2H), 7.23 – 7.09 (m, 4H), 7.04 – 6.90 (m, 1H), 4.17 (t,  $J$  = 6.6 Hz, 2H), 3.36 (h,  $J$  = 7.1 Hz, 1H), 2.62 – 2.42 (m, 2H), 1.78 – 1.60 (m, 2H), 1.24 (d,  $J$  = 7.0 Hz, 3H), 0.92 (t,  $J$  = 7.4 Hz, 3H).

$^{13}\text{C}$  NMR (75 MHz,  $\text{CDCl}_3$ )  $\delta$  169.8, 166.7, 151.1, 137.7, 129.9, 128.8, 128.6, 126.8, 124.3, 120.0, 66.5, 45.8, 36.7, 22.0, 21.3, 10.4.

HRMS (ES-TOF):  $m/z$  calcd. for  $\text{C}_{20}\text{H}_{23}\text{NO}_3\text{Na}^+$  [ $\text{M}+\text{Na}^+$ ] 348.1570, found 348.1569.

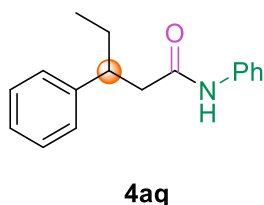

***N*,3-diphenylpentanamide (4aq)**

Chromatography Pentane/EA = 10:1 (v/v), 32.2 mg (64%).

$^1\text{H}$  NMR (300 MHz,  $\text{CDCl}_3$ )  $\delta$  7.28 – 7.04 (m, 3H), 7.02 – 6.86 (m, 0H), 3.06 – 2.89 (m, 0H), 2.67 – 2.39 (m, 1H), 1.80 – 1.46 (m, 1H), 0.71 (t,  $J$  = 7.3 Hz, 1H).

$^{13}\text{C}$  NMR (75 MHz,  $\text{CDCl}_3$ )  $\delta$  170.3, 143.8, 137.6, 128.8, 128.6, 127.5, 126.6, 124.2, 120.0, 45.2, 44.5, 29.0, 11.9.

HRMS (ES-TOF):  $m/z$  calcd. for  $\text{C}_{17}\text{H}_{19}\text{NONa}^+$  [ $\text{M}+\text{Na}^+$ ] 276.1359, found 276.1363.

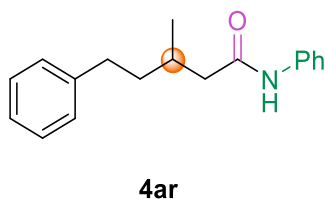

**3-methyl-*N*,5-diphenylpentanamide (4ar)**

Chromatography Pentane/EA = 10:1 (v/v), 43.1 mg (81%).

$^1\text{H}$  NMR (300 MHz,  $\text{CDCl}_3$ )  $\delta$  7.48 – 7.36 (m, 2H), 7.29 – 6.87 (m, 9H), 2.70 – 2.44 (m, 2H), 2.39 – 2.24 (m, 1H), 2.16 – 1.93 (m, 2H), 1.78 – 1.56 (m, 1H), 1.55 – 1.37 (m, 1H), 0.98 (d,  $J$  = 6.3 Hz, 3H).

$^{13}\text{C}$  NMR (75 MHz,  $\text{CDCl}_3$ )  $\delta$  170.8, 142.3, 137.8, 128.9, 128.3, 128.3, 125.7, 124.2, 119.9, 45.3, 38.5, 33.3, 30.6, 19.6.

HRMS (ES-TOF):  $m/z$  calcd. for  $\text{C}_{18}\text{H}_{21}\text{NONa}^+$  [ $\text{M}+\text{Na}^+$ ] 290.1515, found 290.1518.

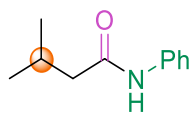

**4as**

**3-methyl-*N*-phenylbutanamide (4as)<sup>[5]</sup>**

Chromatography Pentane/EA = 10:1 (v/v), 29.1 mg (82%).

<sup>1</sup>H NMR (300 MHz, CDCl<sub>3</sub>) δ 7.67 (s, 1H), 7.52 – 7.40 (m, 2H), 7.27 – 7.14 (m, 2H), 7.06 – 6.95 (m, 1H), 2.20 – 2.04 (m, 3H), 0.99 – 0.83 (m, 6H).

<sup>13</sup>C NMR (75 MHz, CDCl<sub>3</sub>) δ 171.2, 137.9, 128.8, 124.2, 120.0, 46.9, 26.2, 22.4.

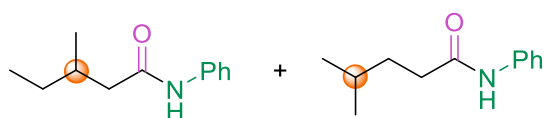

**4at+4au**

**3-methyl-*N*-phenylpentanamide (4at), 4-methyl-*N*-phenylpentanamide (4au)**

Chromatography Pentane/EA = 10:1 (v/v), 22.9 mg (60%).

<sup>1</sup>H NMR (400 MHz, CDCl<sub>3</sub>) δ 7.51 – 7.20 (m, 5.06H), 7.06 – 6.98 (m, 1H), 2.29 (dd, *J* = 13.9, 6.2 Hz, 1.29H), 2.04 (dd, *J* = 13.9, 8.2 Hz, 0.84H), 1.97 – 1.87 (m, 0.82H), 1.63 – 1.51 (m, 0.66H), 1.44 – 1.29 (m, 0.86H), 1.29 – 1.10 (m, 1.23H), 0.91 (d, *J* = 6.6 Hz, 2.51H), 0.85 (d, *J* = 7.2 Hz, 3.59H).

<sup>13</sup>C NMR (101 MHz, CDCl<sub>3</sub>) δ 171.7, 171.1, 138.0, 137.9, 128.9, 124.2, 124.1, 119.9, 119.8, 45.1, 35.8, 34.4, 32.4, 29.4, 27.8, 22.3, 19.2, 11.3.

HRMS (ES-TOF): *m/z* calcd. for C<sub>12</sub>H<sub>18</sub>NO<sup>+</sup> [*M*+*H*<sup>+</sup>] 192.1383, found 192.1388.

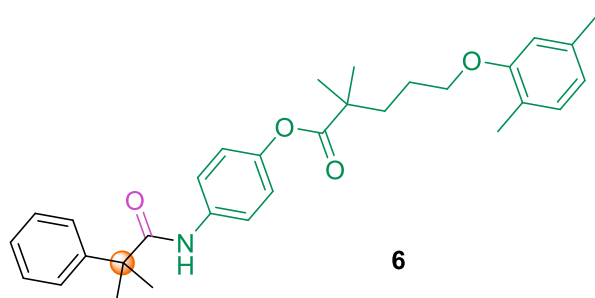

**6**

**4-(2-methyl-2-phenylpropanamido)phenyl 5-(2,5-dimethylphenoxy)-2,2-dimethylpentanoate (6)**

Chromatography Pentane/EA = 8:1 (v/v), 78.5 mg (81%).

<sup>1</sup>H NMR (300 MHz, CDCl<sub>3</sub>) δ 7.53 – 7.30 (m, 7H), 7.04 (dd, *J* = 7.4, 0.9 Hz, 1H), 7.00 – 6.88 (m, 3H), 6.76 – 6.63 (m, 2H), 4.09 – 3.95 (m, 2H), 2.35 (s, 3H), 2.22 (s, 3H), 1.91 (d, *J* = 2.9 Hz, 4H), 1.71 (s, 6H), 1.40 (s, 6H).

<sup>13</sup>C NMR (75 MHz, CDCl<sub>3</sub>) δ 176.4, 175.5, 156.8, 147.0, 144.5, 136.4, 135.5, 130.3, 128.9, 127.3, 126.4, 123.5, 121.7, 120.7, 120.5, 111.9, 67.7, 47.9, 42.3, 37.0, 26.9, 25.2, 25.1, 21.3, 15.7.

HRMS (ES-TOF): *m/z* calcd. for C<sub>31</sub>H<sub>38</sub>NO<sub>4</sub><sup>+</sup> [*M*+*H*<sup>+</sup>] 488.2795, found 488.2799.

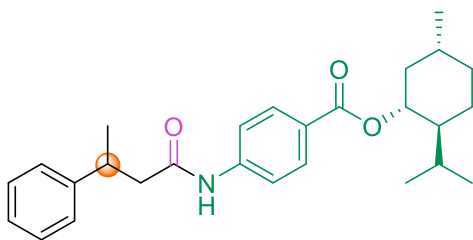

8

**(1R,2S,5R)-2-isopropyl-5-methylcyclohexyl 4-(3-phenylbutanamido)benzoate (8)**

Chromatography Pentane/EA = 6:1 (v/v), 74.8 mg (89%).

$^1\text{H}$  NMR (300 MHz,  $\text{CDCl}_3$ )  $\delta$  7.91 – 7.81 (m, 2H), 7.65 (d,  $J$  = 3.8 Hz, 1H), 7.44 – 7.33 (m, 2H), 7.26 – 7.16 (m, 2H), 7.15 – 7.05 (m, 3H), 4.88 – 4.74 (m, 1H), 3.37 – 3.19 (m, 1H), 2.65 – 2.44 (m, 2H), 2.07 – 1.93 (m, 1H), 1.92 – 1.76 (m, 1H), 1.70 – 1.54 (m, 2H), 1.53 – 1.35 (m, 2H), 1.26 (d,  $J$  = 7.0 Hz, 3H), 1.12 – 0.92 (m, 2H), 0.90 – 0.75 (m, 7H), 0.68 (d,  $J$  = 6.9 Hz, 3H).

$^{13}\text{C}$  NMR (75 MHz,  $\text{CDCl}_3$ )  $\delta$  170.4, 165.7, 145.4, 141.9, 130.6, 128.7, 126.7, 126.6, 126.0, 118.9, 74.8, 47.2, 46.6, 40.9, 36.9, 36.9, 34.2, 31.4, 26.5, 23.6, 22.0, 21.6, 20.7, 16.5.

HRMS (ES-TOF):  $m/z$  calcd. for  $\text{C}_{27}\text{H}_{35}\text{NO}_3\text{Na}^+$  [ $\text{M}+\text{Na}^+$ ] 444.2509, found 444.2506.

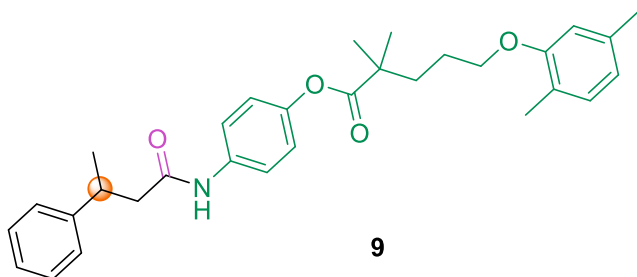

9

**4-(3-phenylbutanamido)phenyl 5-(2,5-dimethylphenoxy)-2,2-dimethylpentanoate (9)**

Chromatography Pentane/EA = 5:1 (v/v), 89.8 mg (92%).

$^1\text{H}$  NMR (300 MHz,  $\text{CDCl}_3$ )  $\delta$  7.52 (s, 1H), 7.41 – 7.20 (m, 7H), 7.06 (dd,  $J$  = 7.4, 0.9 Hz, 1H), 6.98 – 6.87 (m, 2H), 6.77 – 6.65 (m, 2H), 4.10 – 3.98 (m, 2H), 3.40 (q,  $J$  = 7.1 Hz, 1H), 2.69 – 2.49 (m, 2H), 2.36 (d,  $J$  = 0.9 Hz, 3H), 2.23 (s, 3H), 1.92 (t,  $J$  = 2.1 Hz, 4H), 1.57 – 1.11 (m, 9H).

$^{13}\text{C}$  NMR (75 MHz,  $\text{CDCl}_3$ )  $\delta$  176.8, 170.1, 156.8, 146.9, 145.6, 136.4, 135.3, 130.3, 128.6, 126.7, 126.5, 123.5, 121.6, 121.0, 120.7, 111.9, 67.6, 46.3, 42.3, 37.0, 36.8, 25.2, 25.1, 21.5, 21.3, 15.7.

HRMS (ES-TOF):  $m/z$  calcd. for  $\text{C}_{31}\text{H}_{37}\text{NO}_4\text{Na}^+$  [ $\text{M}+\text{Na}^+$ ] 510.2614, found 510.2618.

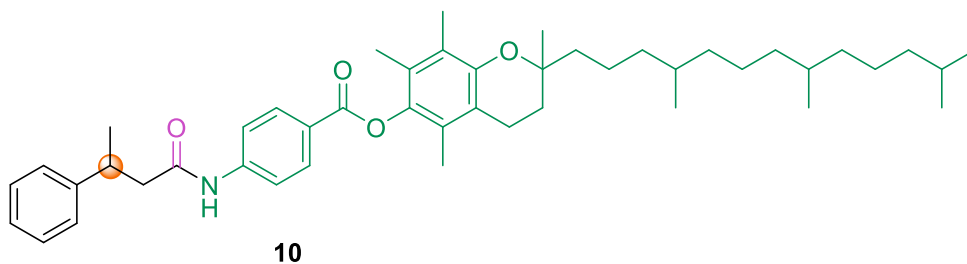

**2,5,7,8-tetramethyl-2-(4,8,12-trimethyltridecyl)chroman-6-yl 4-(3-phenylbutanamido)benzoate (10)**

Chromatography Pentane/EA = 6:1 (v/v), 122.4 mg (88%).

$^1\text{H}$  NMR (300 MHz,  $\text{CDCl}_3$ )  $\delta$  8.24 – 8.13 (m, 2H), 8.01 (s, 1H), 7.57 (d,  $J$  = 8.7 Hz, 2H), 7.39 – 7.30 (m, 2H), 7.29 – 7.21 (m, 3H), 3.59 – 3.27 (m, 1H), 2.73 – 2.53 (m, 4H), 2.30 – 2.02 (m, 9H), 1.94 – 1.73 (m, 2H), 1.69 – 1.09 (m, 27H), 1.00 – 0.88 (m, 12H).

$^{13}\text{C}$  NMR (75 MHz,  $\text{CDCl}_3$ )  $\delta$  170.6, 165.1, 149.4, 145.4, 142.7, 140.5, 131.2, 128.6, 126.8, 126.7, 126.6, 125.0, 124.4, 123.1, 119.1, 117.4, 75.0, 46.3, 39.3, 37.5, 37.4, 37.3, 37.3, 37.2, 36.8, 32.7, 27.9, 24.7, 24.4, 22.7, 22.6, 21.6, 21.0, 20.5, 19.7, 19.6, 19.6, 19.6, 19.5, 13.0, 12.1, 11.8.

HRMS (ES-TOF):  $m/z$  calcd. for  $\text{C}_{46}\text{H}_{66}\text{NO}_4^+$  [ $\text{M}+\text{H}^+$ ] 696.4986, found 696.4989.

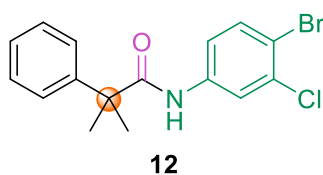

**N-(4-bromo-3-chlorophenyl)-2-methyl-2-phenylpropanamide (12)**

Chromatography Pentane/EA = 20:1 (v/v), 49.5 mg (71%).

$^1\text{H}$  NMR (300 MHz,  $\text{CDCl}_3$ )  $\delta$  7.53 (d,  $J$  = 2.5 Hz, 1H), 7.40 – 7.22 (m, 6H), 7.02 (dd,  $J$  = 8.7, 2.5 Hz, 1H), 6.72 (s, 1H), 1.58 (s, 6H).

$^{13}\text{C}$  NMR (75 MHz,  $\text{CDCl}_3$ )  $\delta$  175.7, 144.0, 138.1, 134.6, 133.5, 129.1, 127.6, 126.4, 121.2, 119.0, 116.5, 48.2, 26.9.

HRMS (ES-TOF):  $m/z$  calcd. for  $\text{C}_{16}\text{H}_{15}\text{BrClN}\text{ONa}^+$  [ $\text{M}+\text{Na}^+$ ] 352.0099, found 352.0108.

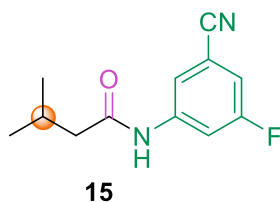

**N-(3-cyano-5-fluorophenyl)-3-methylbutanamide (15)**

Chromatography Pentane/EA = 6:1 (v/v), 29.1 mg (66%).

$^1\text{H}$  NMR (300 MHz,  $\text{CDCl}_3$ )  $\delta$  7.83 – 7.73 (m, 1H), 7.71 (s, 1H), 7.61 – 7.53 (m, 1H), 7.12 – 7.03 (m, 1H), 2.31 – 2.08 (m, 3H), 1.01 (d,  $J$  = 6.5 Hz, 6H).



$^{13}\text{C}$  NMR (75 MHz,  $\text{CDCl}_3$ )  $\delta$  171.4, 162.5 (d,  $J = 249.0$  Hz), 140.6 (d,  $J = 11.4$  Hz), 118.5 (d,  $J = 3.3$  Hz), 117.4 (d,  $J = 3.8$  Hz), 114.2 (d,  $J = 25.1$  Hz), 113.7 (d,  $J = 11.1$  Hz), 111.7 (d,  $J = 26.2$  Hz), 46.8, 26.2, 22.4.

$^{19}\text{F}$  NMR (282 MHz,  $\text{CDCl}_3$ )  $\delta$  -107.74 – -107.93 (m).

HRMS (ES-TOF):  $m/z$  calcd. for  $\text{C}_{12}\text{H}_{13}\text{FN}_2\text{O}_2\text{Na}^+$  [ $\text{M}+\text{Na}^+$ ] 221.1085, found 221.1083.

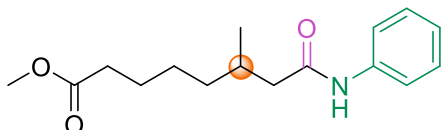

**17**

**methyl 6-methyl-8-oxo-8-(phenylamino)octanoate (17)**

Chromatography Pentane/EA = 6:1 (v/v), 33.4 mg (60%).

$^1\text{H}$  NMR (300 MHz,  $\text{CDCl}_3$ )  $\delta$  7.53 – 7.40 (m, 1H), 7.28 – 7.16 (m, 1H), 7.07 – 6.96 (m, 0H), 3.59 (s, 1H), 2.36 – 2.18 (m, 1H), 2.11 – 1.94 (m, 1H), 1.62 – 1.46 (m, 1H), 1.39 – 1.08 (m, 1H), 0.91 (d,  $J = 6.2$  Hz, 1H).

$^{13}\text{C}$  NMR (75 MHz,  $\text{CDCl}_3$ )  $\delta$  174.25, 170.97, 137.98, 128.89, 124.12, 119.84, 51.46, 45.21, 36.22, 33.90, 30.63, 26.32, 24.87, 19.63.

HRMS (ES-TOF):  $m/z$  calcd. for  $\text{C}_{16}\text{H}_{23}\text{NO}_3\text{Na}^+$  [ $\text{M}+\text{Na}^+$ ] 300.1570, found 300.1578.

## 5. Intermediate verification experiments

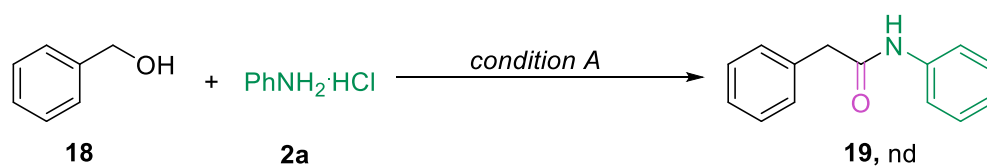

A 4 mL screw-cap vial was charged with [Pd(cinnamyl)Cl]<sub>2</sub> (2.6 mg, 2.5 mol%), (4-CF<sub>3</sub>C<sub>6</sub>H<sub>4</sub>)<sub>3</sub>P (16.1 mg, 12 mol%), ArNH<sub>2</sub>·HCl (0.2 mmol, 1.0 equiv.), alcohol **18** (0.3 mmol, 1.5 equiv.) and an oven-dried stirring bar. The vial was closed with a Teflon septum and cap and connected to the atmosphere via a needle. After DCE (1.0 mL) was added with a syringe, the vial was moved to an alloy plate and put into a Parr 4560 series autoclave (300 mL). At room temperature, the autoclave was flushed three times with N<sub>2</sub> and CO, respectively, and finally charged with 40 atm CO. The autoclave was placed on a heating plate equipped with a magnetic stirrer and an aluminum block. The reaction mixture was heated to 110 °C for 30 h. After reaction, cooling to room temperature. Results were observed by TLC and GC-MS.

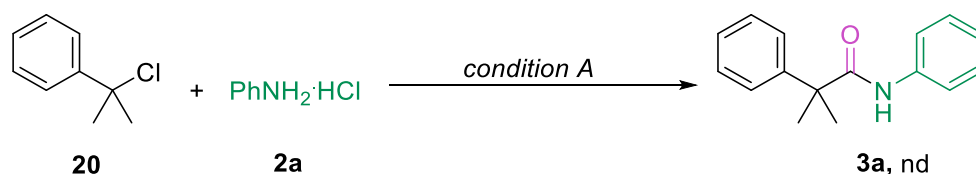

A 4 mL screw-cap vial was charged with [Pd(cinnamyl)Cl]<sub>2</sub> (2.6 mg, 2.5 mol%), (4-CF<sub>3</sub>C<sub>6</sub>H<sub>4</sub>)<sub>3</sub>P (16.1 mg, 12 mol%), ArNH<sub>2</sub>·HCl (0.2 mmol, 1.0 equiv.), alkyl chloride **20** (0.3 mmol, 1.5 equiv.) and an oven-dried stirring bar. The vial was closed with a Teflon septum and cap and connected to the atmosphere via a needle. After DCE (1.0 mL) was added with a syringe, the vial was moved to an alloy plate and put into a Parr 4560 series autoclave (300 mL). At room temperature, the autoclave was flushed three times with N<sub>2</sub> and CO, respectively, and finally charged with 40 atm CO. The autoclave was placed on a heating plate equipped with a magnetic stirrer and an aluminum block. The reaction mixture was heated to 110 °C for 30 h. After reaction, cooling to room temperature. Results were observed by TLC and GC-MS.

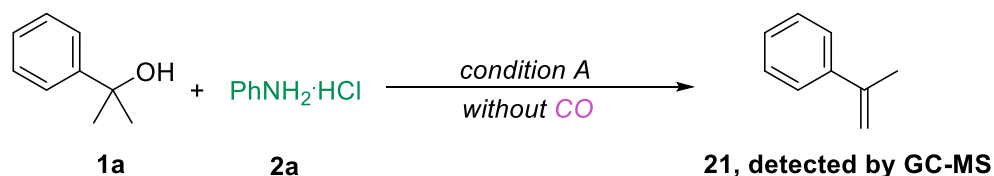

A 5 mL vial was charged with [Pd(cinnamyl)Cl]<sub>2</sub> (2.6 mg, 2.5 mol%), (4-CF<sub>3</sub>C<sub>6</sub>H<sub>4</sub>)<sub>3</sub>P (16.1 mg, 12 mol%), ArNH<sub>2</sub>·HCl (0.2 mmol, 1.0 equiv.), alcohol **1a** (0.3 mmol, 1.5 equiv.) and an oven-dried stirring bar. The vial was closed with a Teflon septum and cap and connected to the atmosphere via a needle. After DCE (1.0 mL) was added with a syringe. The reaction mixture was heated to 110 °C for 18 h. After reaction, cooling to room temperature. Results were observed by TLC and GC-MS.

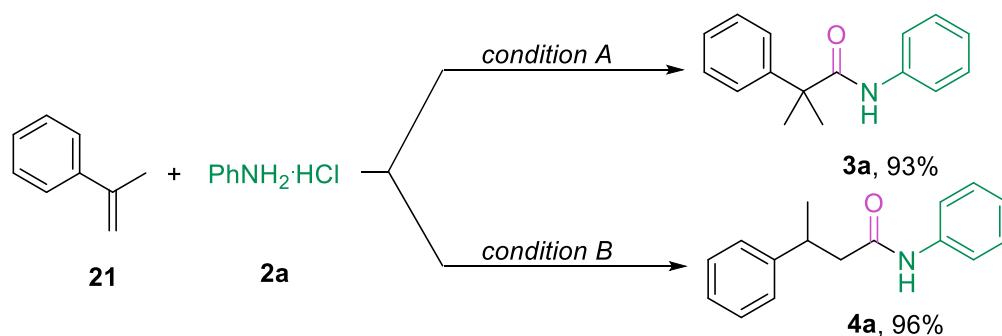

A 4 mL screw-cap vial was charged with Pd cat., ligand, PhNH<sub>2</sub>HCl, cyclobutene **26** and an oven-dried stirring bar. The vial was closed with a Teflon septum and cap and connected to the atmosphere via a needle. After DCE (1.0 or 2.0 mL) was added with a syringe, the vial was moved to an alloy plate and put into a Parr 4560 series autoclave (300 mL). At room temperature, the autoclave was flushed three times with N<sub>2</sub> and CO, respectively, and finally charged with 40 or 20 atm CO. The autoclave was placed on a heating plate equipped with a magnetic stirrer and an aluminum block. After reaction, cooling to room temperature. The crude product was purified by silica gel chromatography (pentane/EA) to afford the corresponding product **3a** (condition A) or **4a** (condition B).

## 6. Reference

- [1] H. Y. Yang, Y. H. Yao, M. Chen, Z. H. Ren, Z. H. Guan, *J. Am. Chem. Soc.* **2021**, *143*, 7298-7305.
- [2] P. Yuan, J. Chen, J. Zhao, Y. Huang. *Angew. Chem. Int. Ed.* **2018**, *57*, 8503-8507.
- [3] Z. Wu, J. D. Laffoon, T. T. Nguyen, J. D. Mcalpin, K. L. Hull. *Angew. Chem. Int. Ed.* **2017**, *56*, 1371-1375.
- [4] G. A. Molander, S. R. Wisniewski, M. Hosseini-Sarvari. *Adv. Synth. Catal.* **2013**, *355*, 3037-3057.
- [5] P. Cooper, G. E. M. Crisenza, L. J. Feron, J. F. Bower. *Angew. Chem. Int. Ed.* **2018**, *57*, 14198-14202.

## 7. NMR spectra of products

230904.317.10.fid — Xingwei Gu, gxw-185-1 — Au1H CDCl<sub>3</sub> {C:\Bruker\TopSpin3.6.2} 2309 17 - 300 MHz

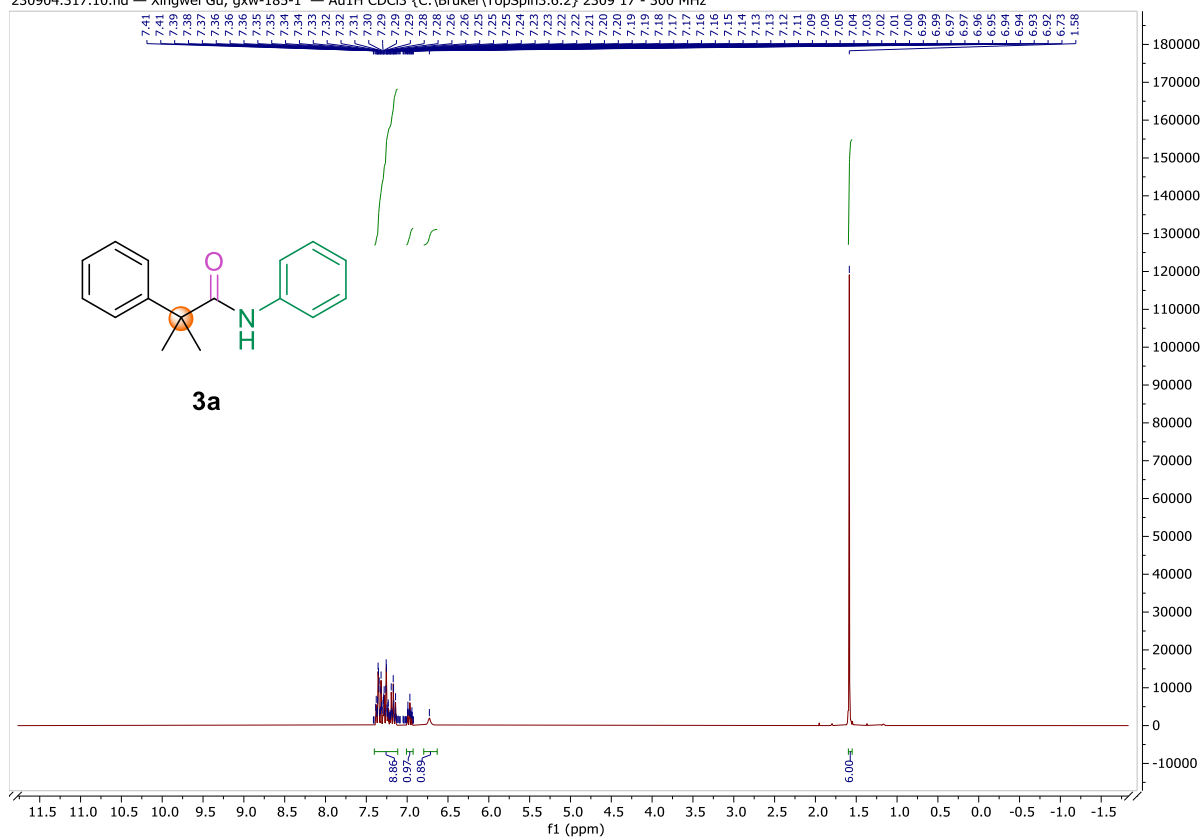

230904.317.11.fid — Xingwei Gu, gxw-185-1 — Au13C CDCl<sub>3</sub> {C:\Bruker\TopSpin3.6.2} 2309 17 - 75 MHz

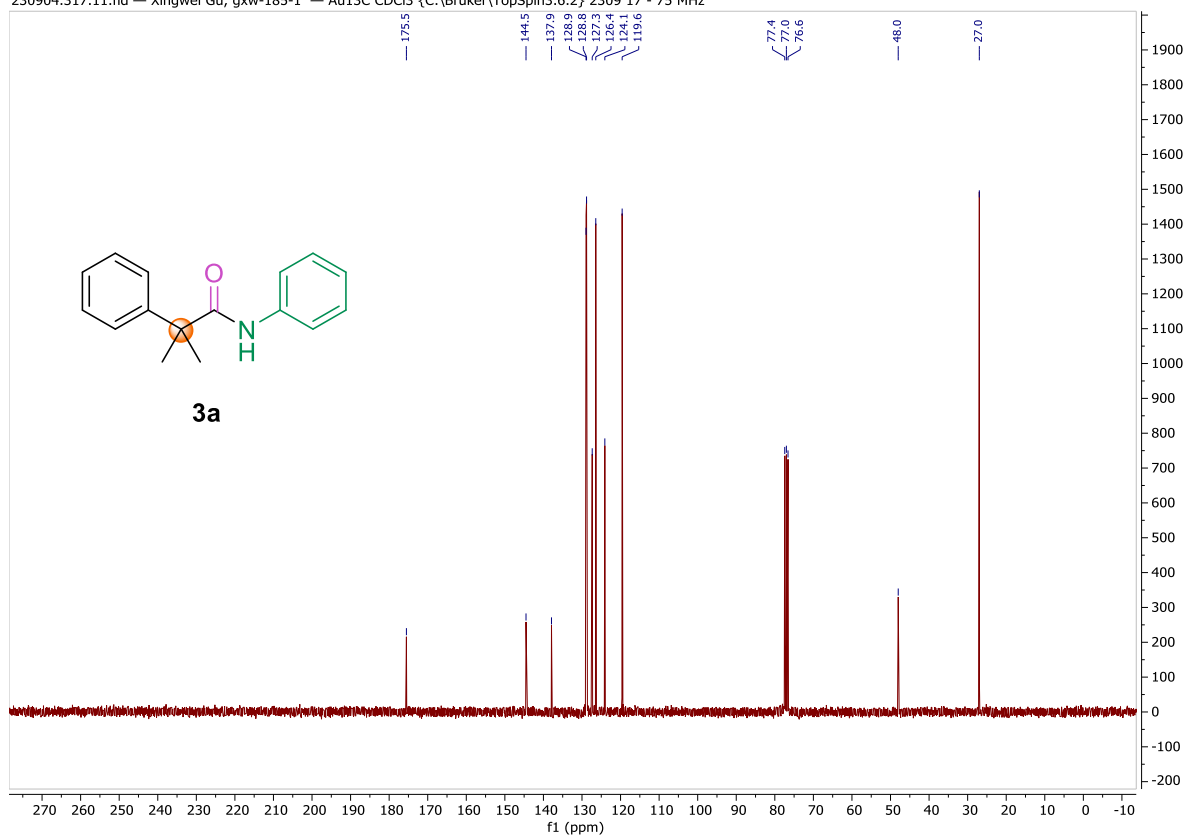

231010.f304.10.fid — Xingwei Gu gxw-195-2 — Au1H CDCl3 {C:\Bruker\TopSpin3.6.2} 2310 4 - 300 MHz

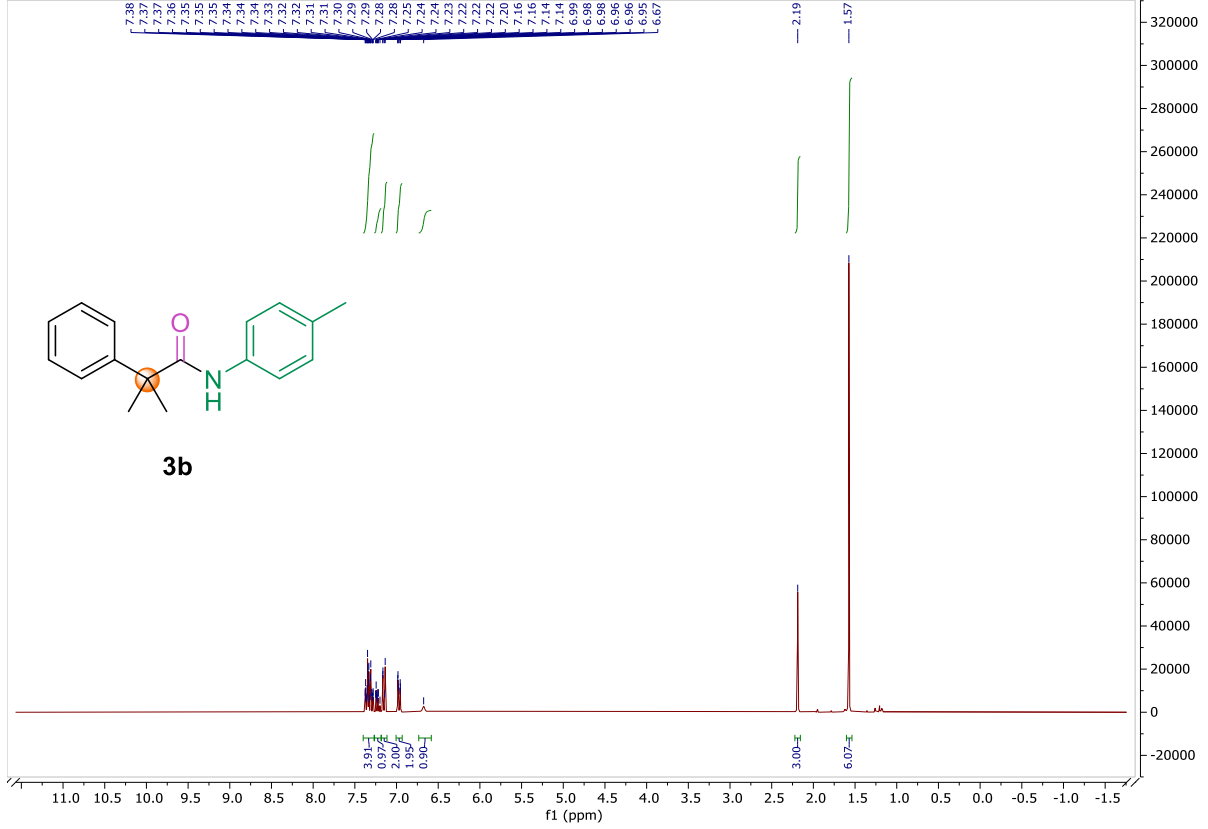

231010.f304.11.fid — Xingwei Gu gxw-195-2 — Au13C CDCl3 {C:\Bruker\TopSpin3.6.2} 2310 4 - 75 MHz

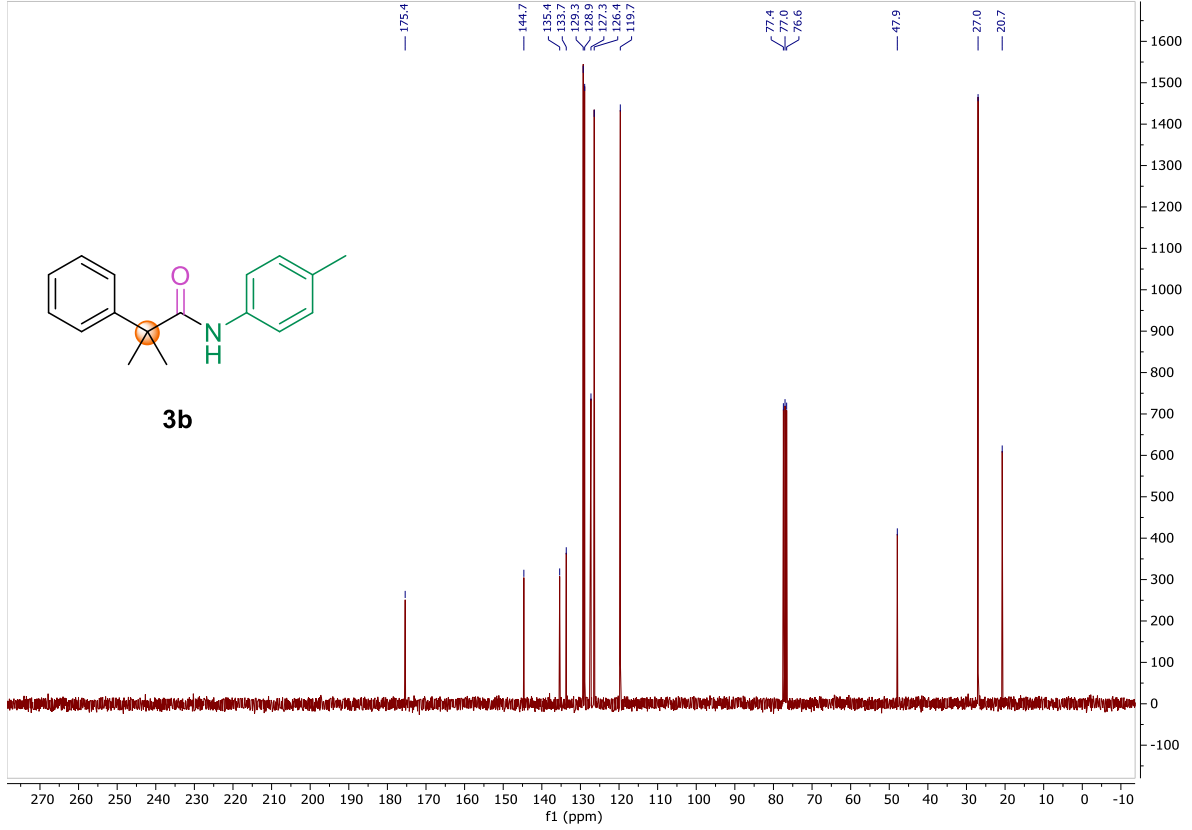

230919.f314.10.fid — Xingwei Gu gxw-185-19 — PROTON CDCl3 {C:\Bruker\TopSpin3.6.2} 2309 14 - 300 MHz

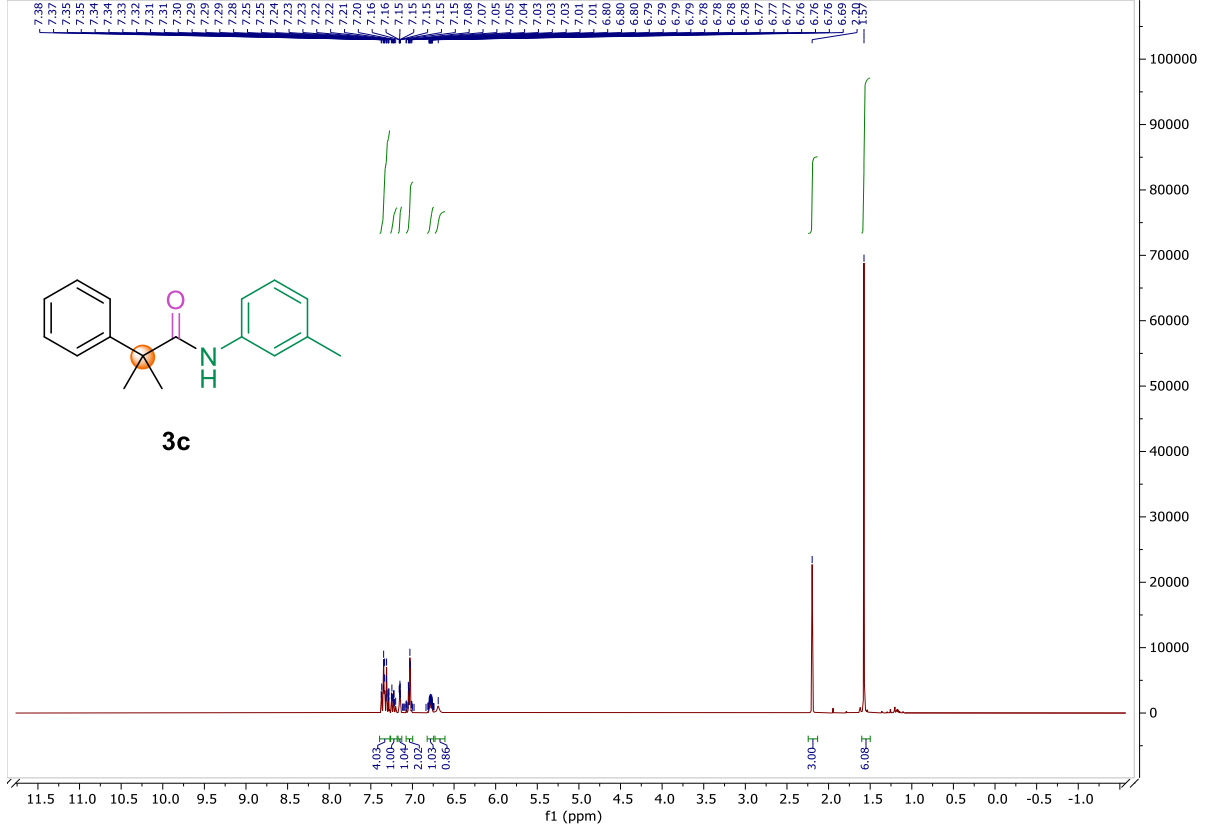

230919.f314.11.fid — Xingwei Gu gxw-185-19 — Au13C CDCl3 {C:\Bruker\TopSpin3.6.2} 2309 14 - 75 MHz

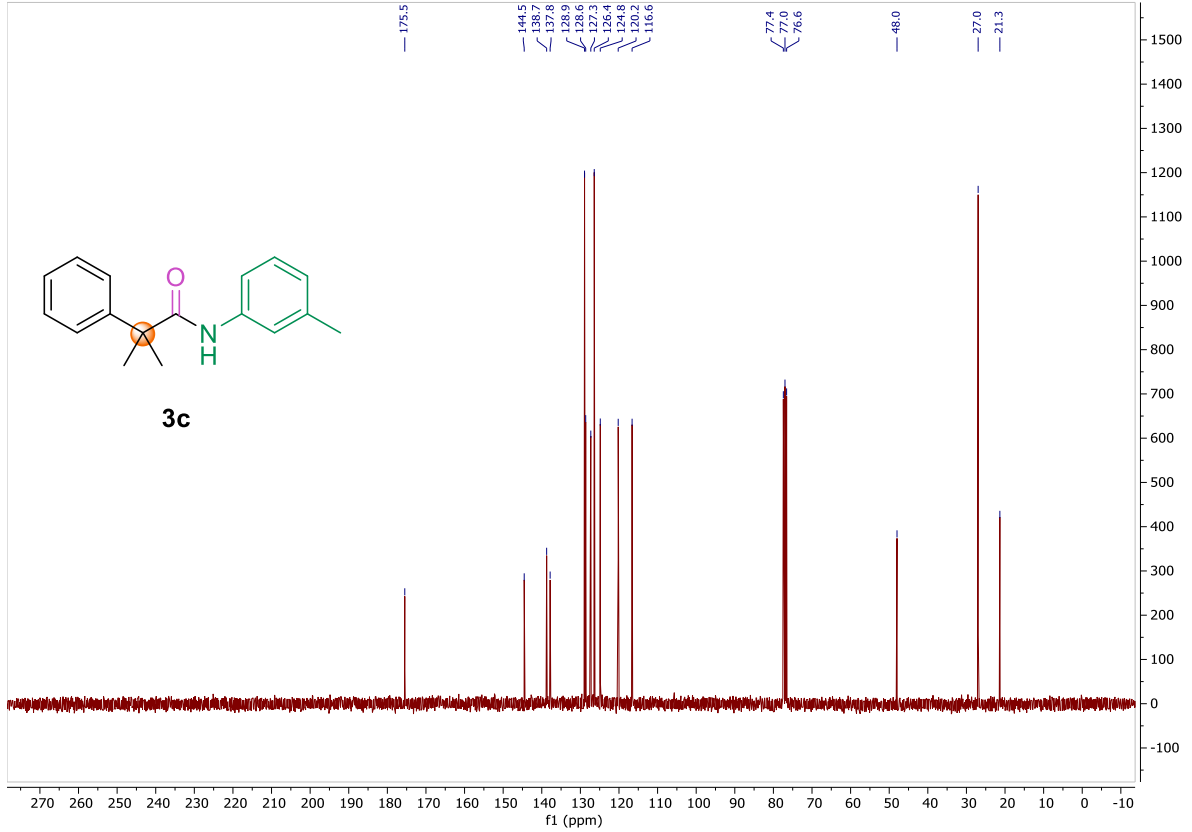

230919.f312.10.fid — Xingwei Gu gxw-185-16 — PROTON CDCl3 {C:\Bruker\TopSpin3.6.2} 2309 12 - 300 MHz

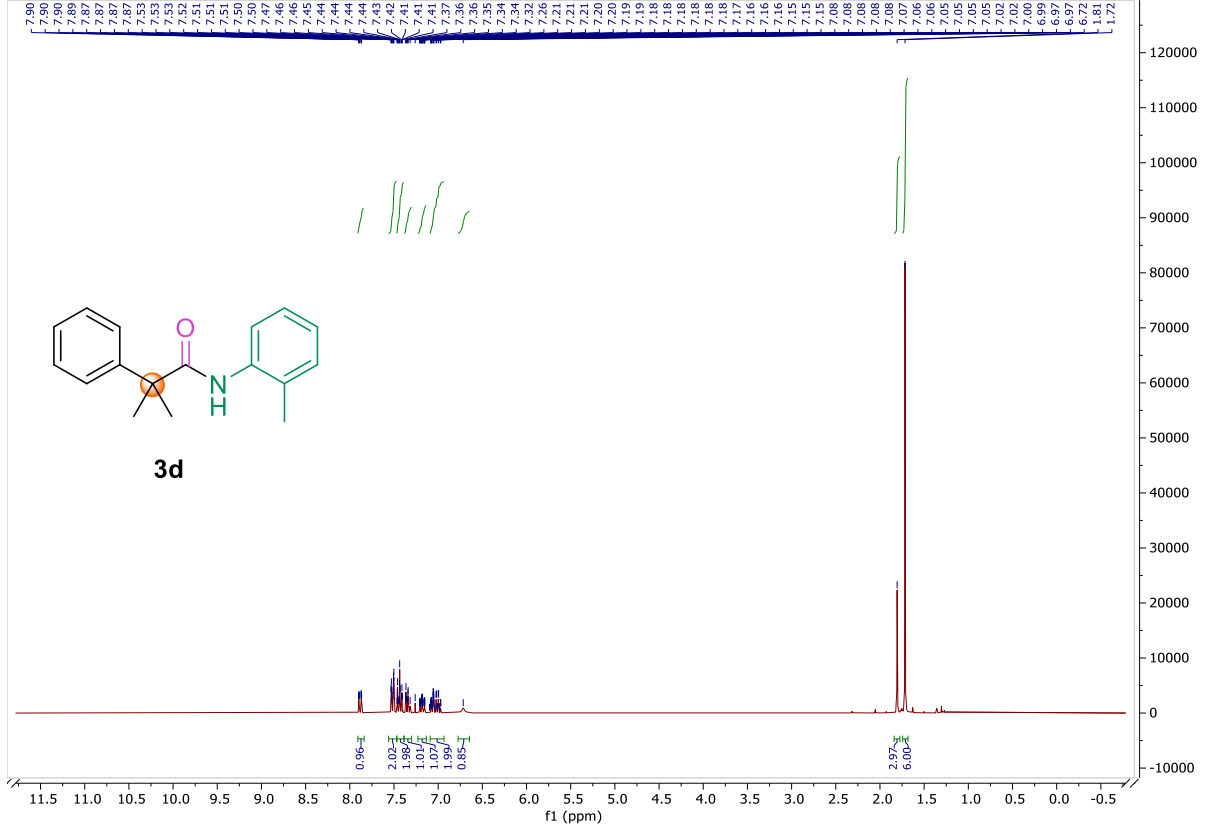

230919.f312.11.fid — Xingwei Gu gxw-185-16 — Au13C CDCl3 {C:\Bruker\TopSpin3.6.2} 2309 12 - 75 MHz

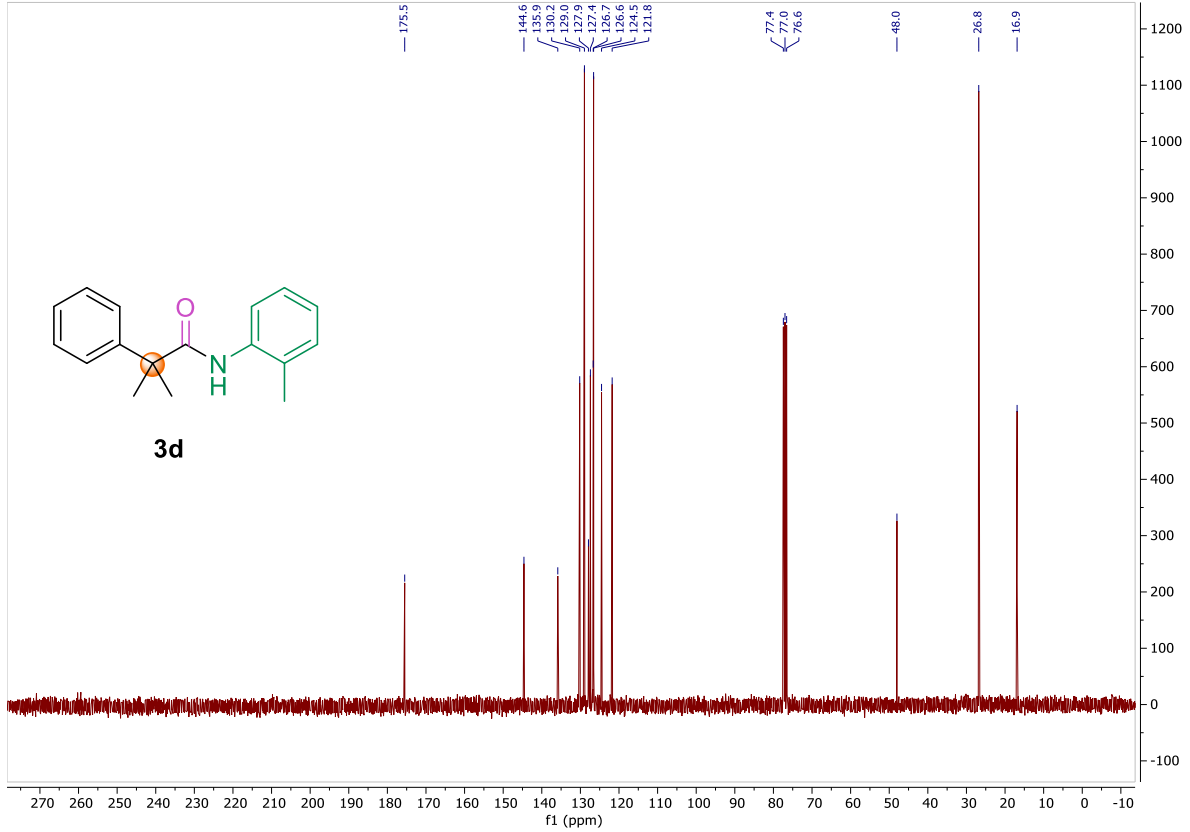

230904.318.10.fid — Xingwei Gu, gxw-185-2 — Au1H CDCl3 {C:\Bruker\TopSpin3.6.2} 2309 18 - 300 MHz

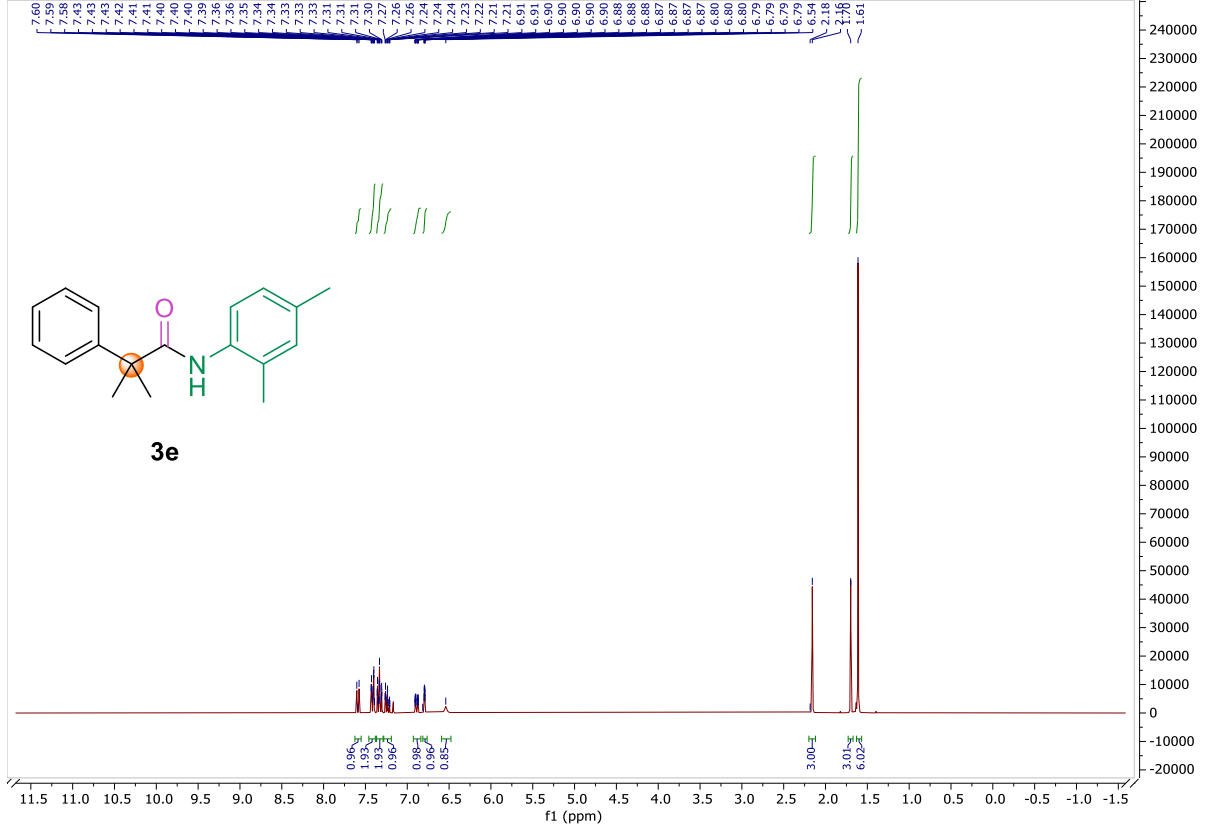

230904.318.11.fid — Xingwei Gu, gxw-185-2 — Au13C CDCl3 {C:\Bruker\TopSpin3.6.2} 2309 18 - 75 MHz

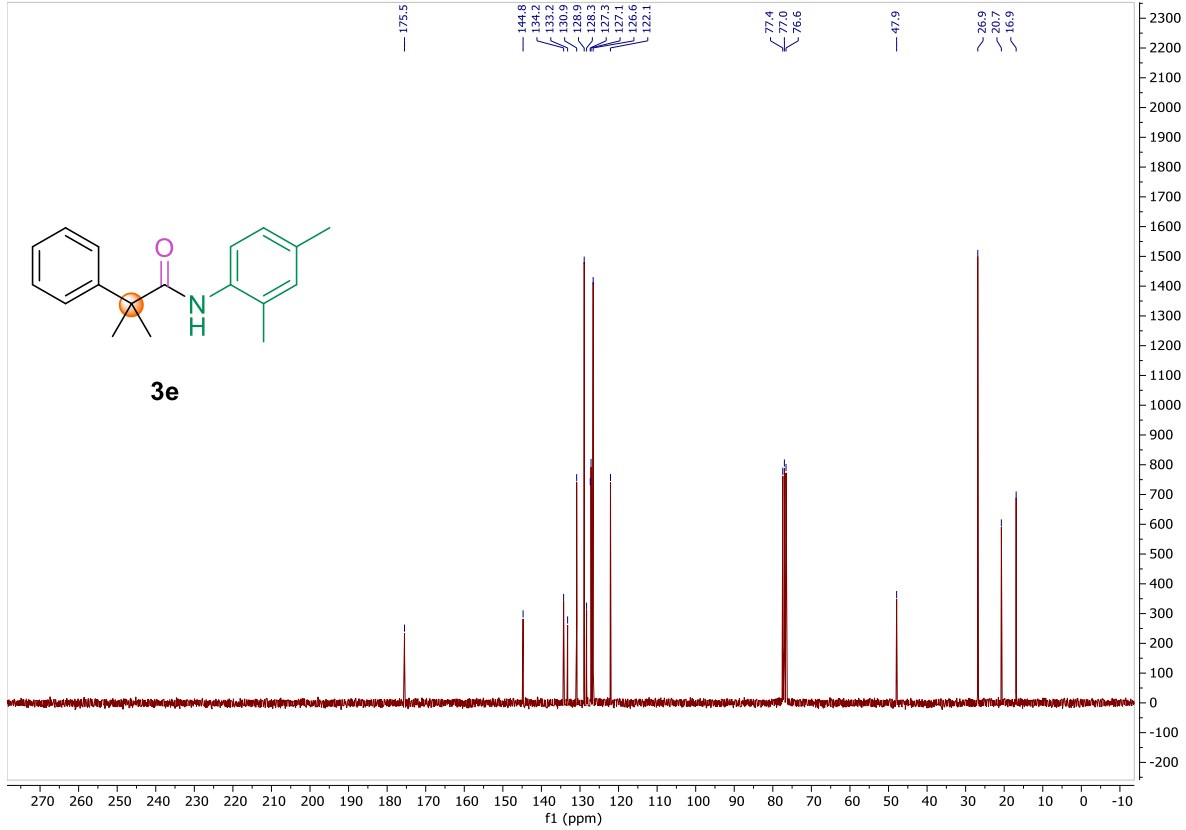



230905.323.10.fid — Xingwei Gu, gxw-185-9 — Au1H CDCl3 {C:\Bruker\TopSpin3.6.2} 2309 23 - 300 MHz

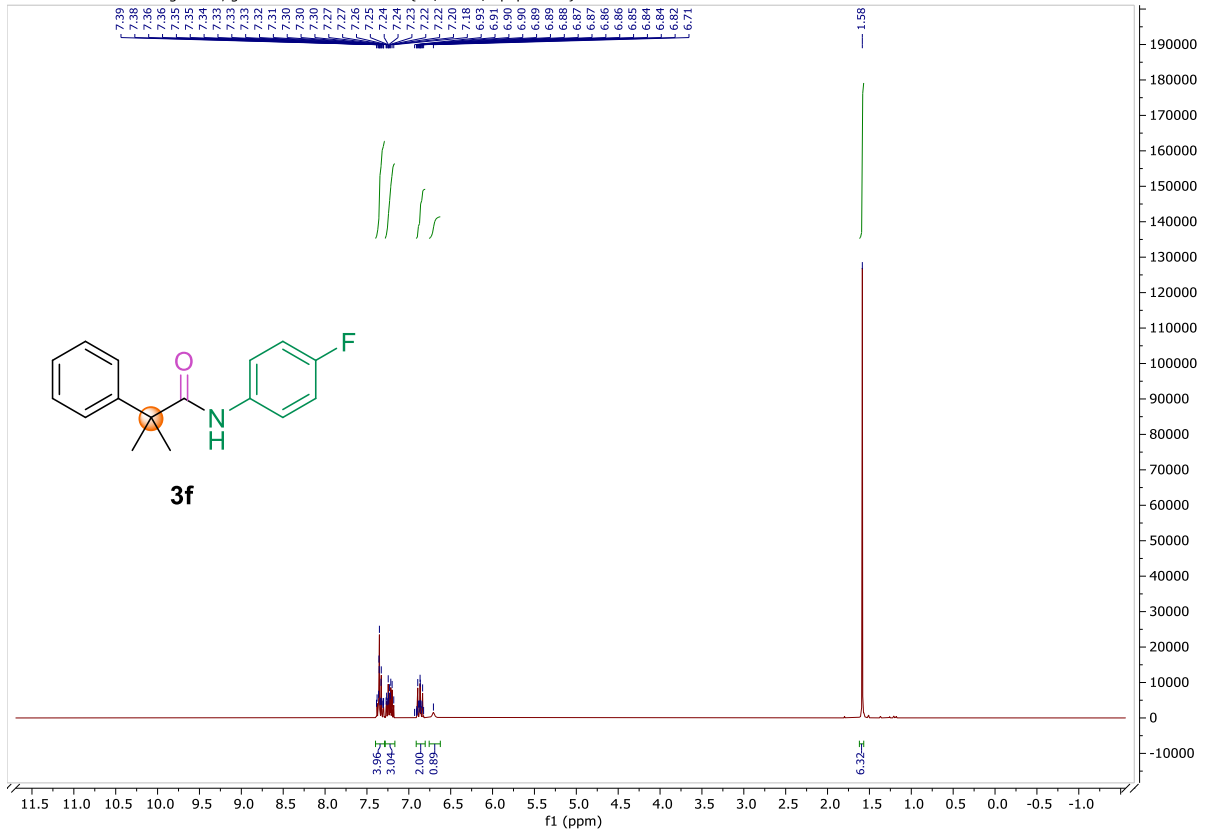

230905.323.11.fid — Xingwei Gu, gxw-185-9 — Au13C CDCl3 {C:\Bruker\TopSpin3.6.2} 2309 23 - 75 MHz

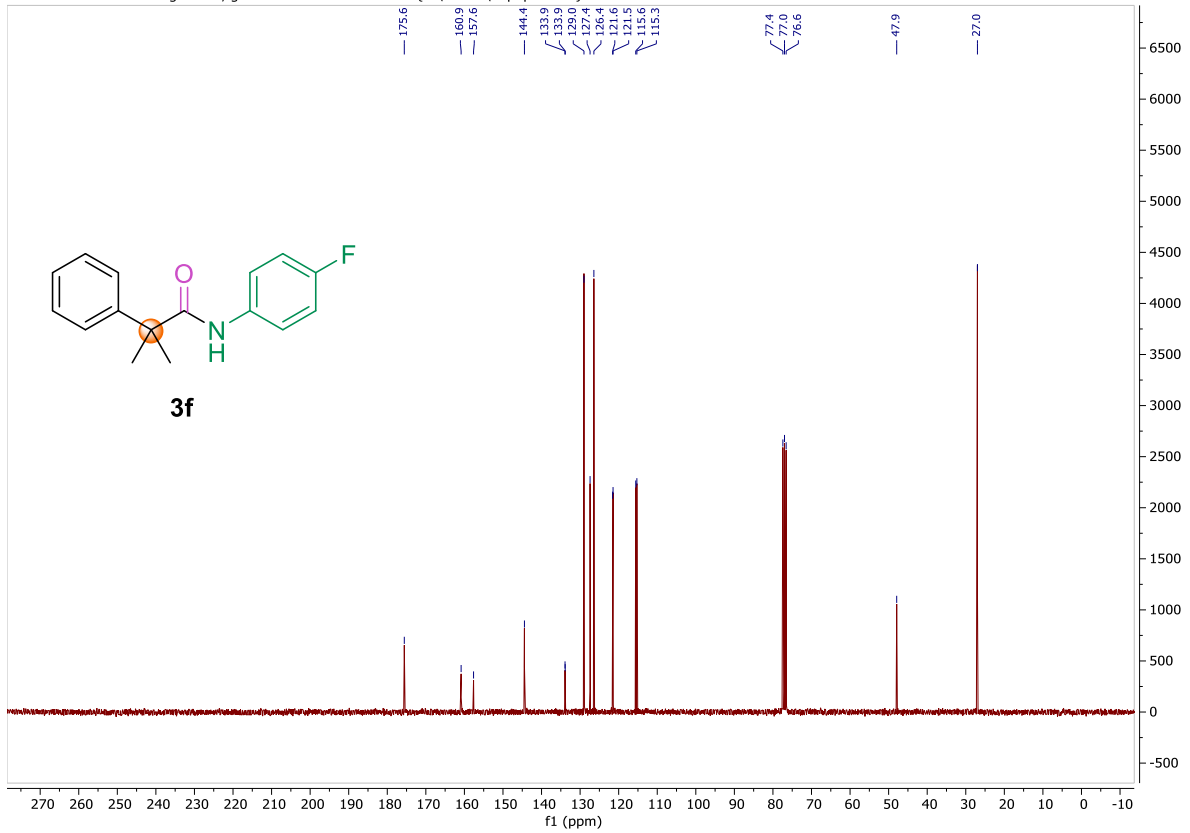

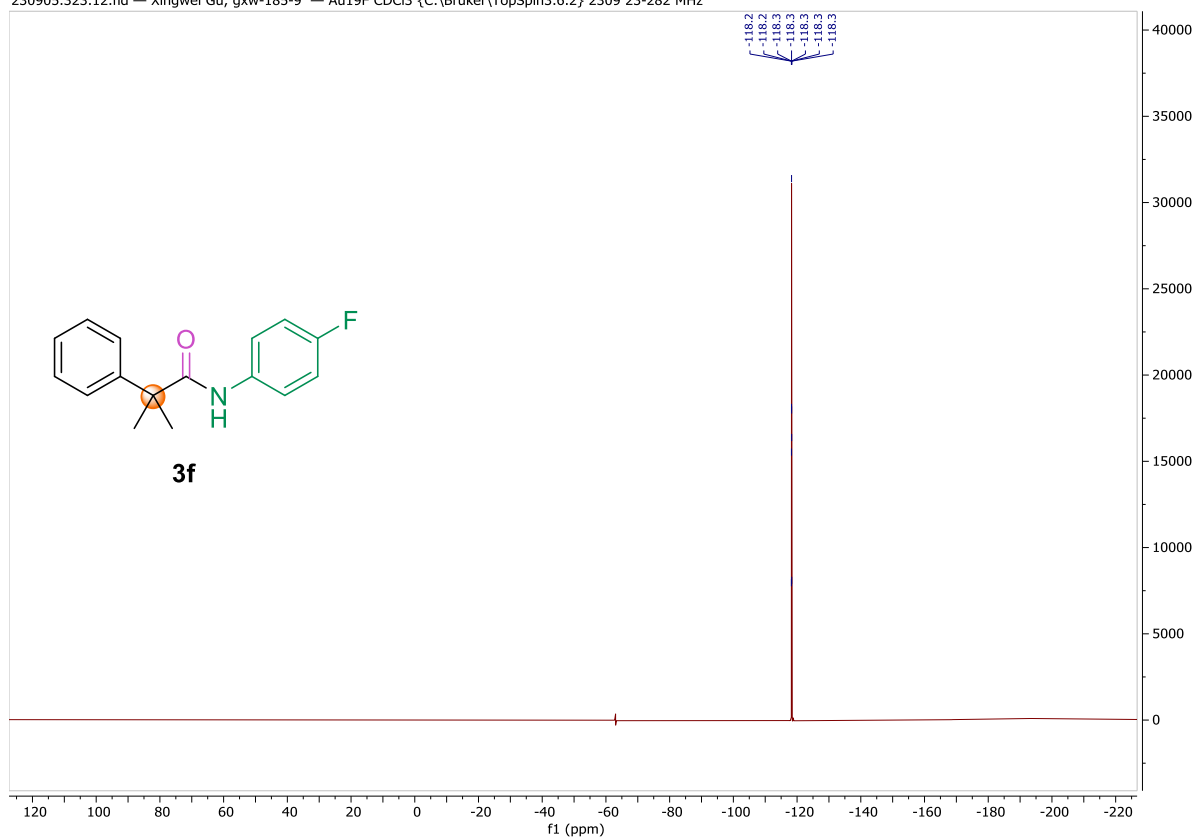

230914.328.10.fid — Xingwei Gu, gxw-184-14 — Au1H CDCl3 {C:\Bruker\TopSpin3.6.2} 2309 28 - 300 MHz

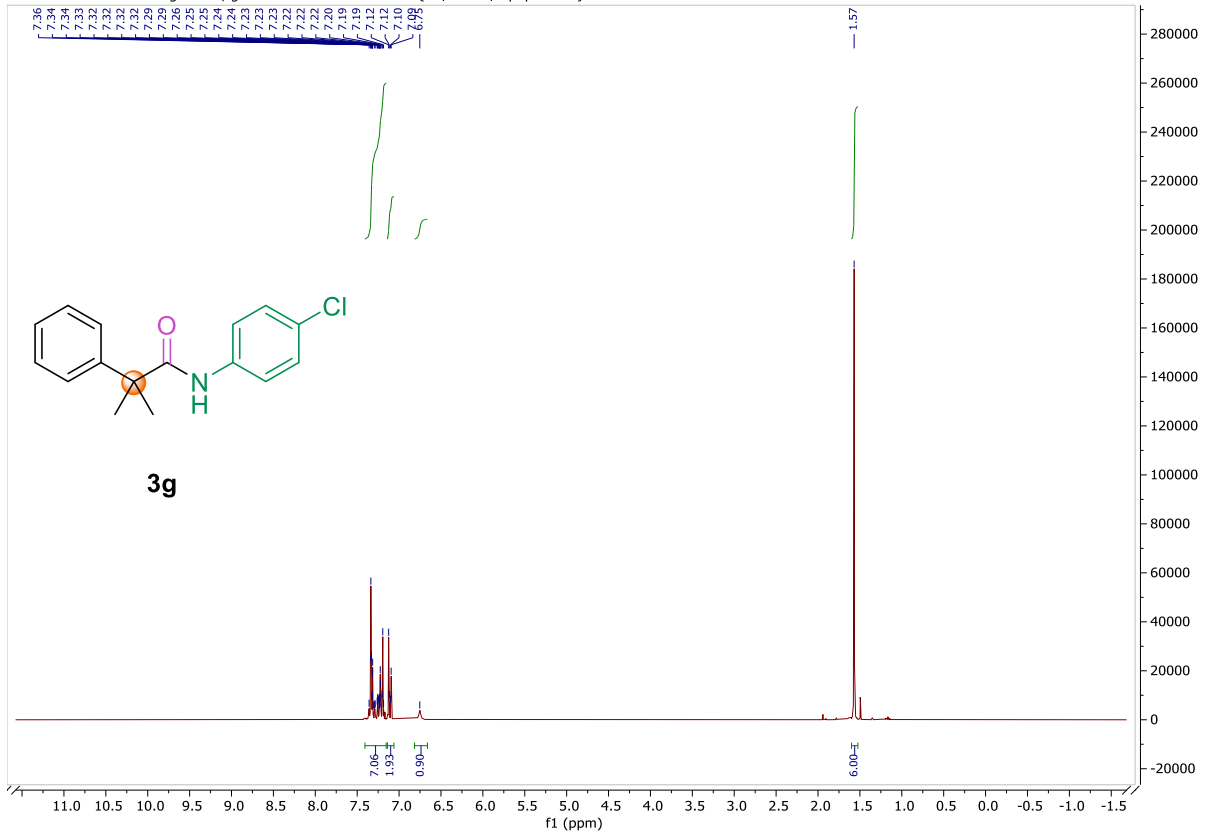

230914.328.11.fid — Xingwei Gu, gxw-184-14 — Au13C CDCl3 {C:\Bruker\TopSpin3.6.2} 2309 28 - 75 MHz

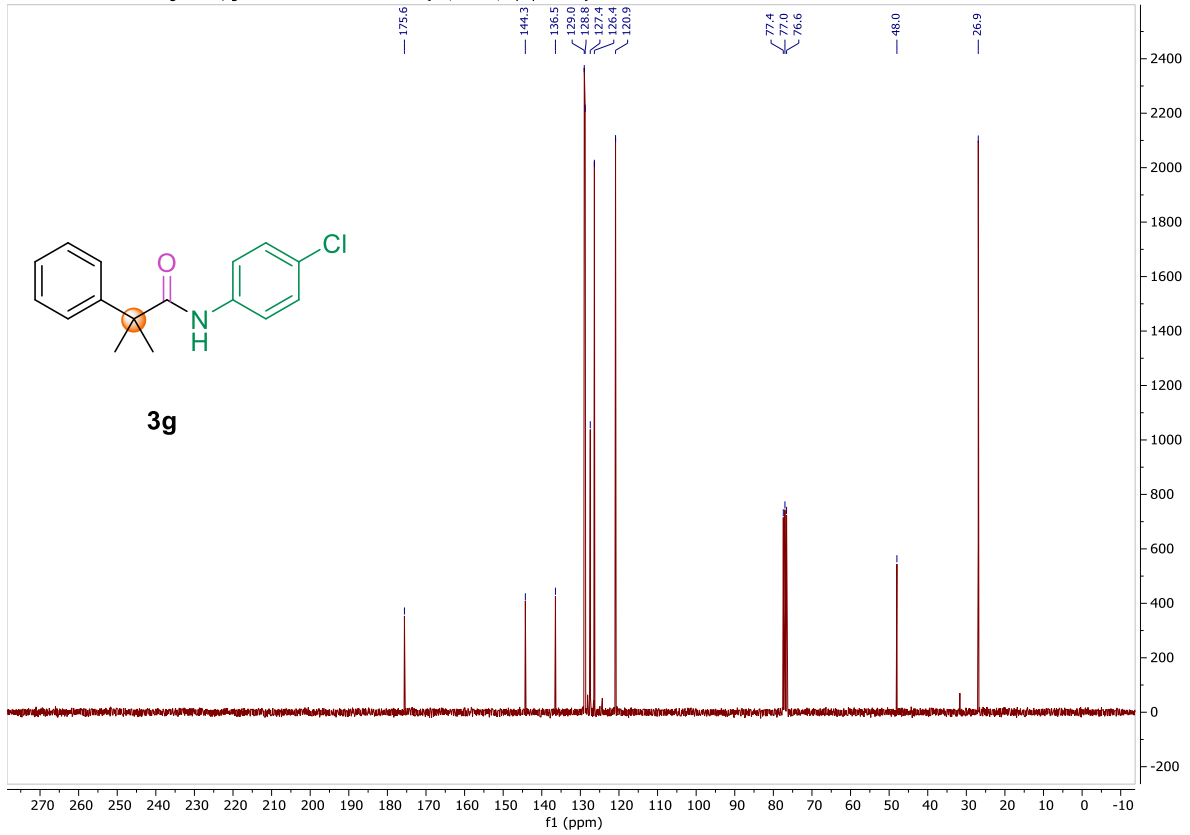



231010.f303.10.fid — Xingwei Gu gxw-195-1 — Au1H CDCl3 {C:\Bruker\TopSpin3.6.2} 2310 3 - 300 MHz

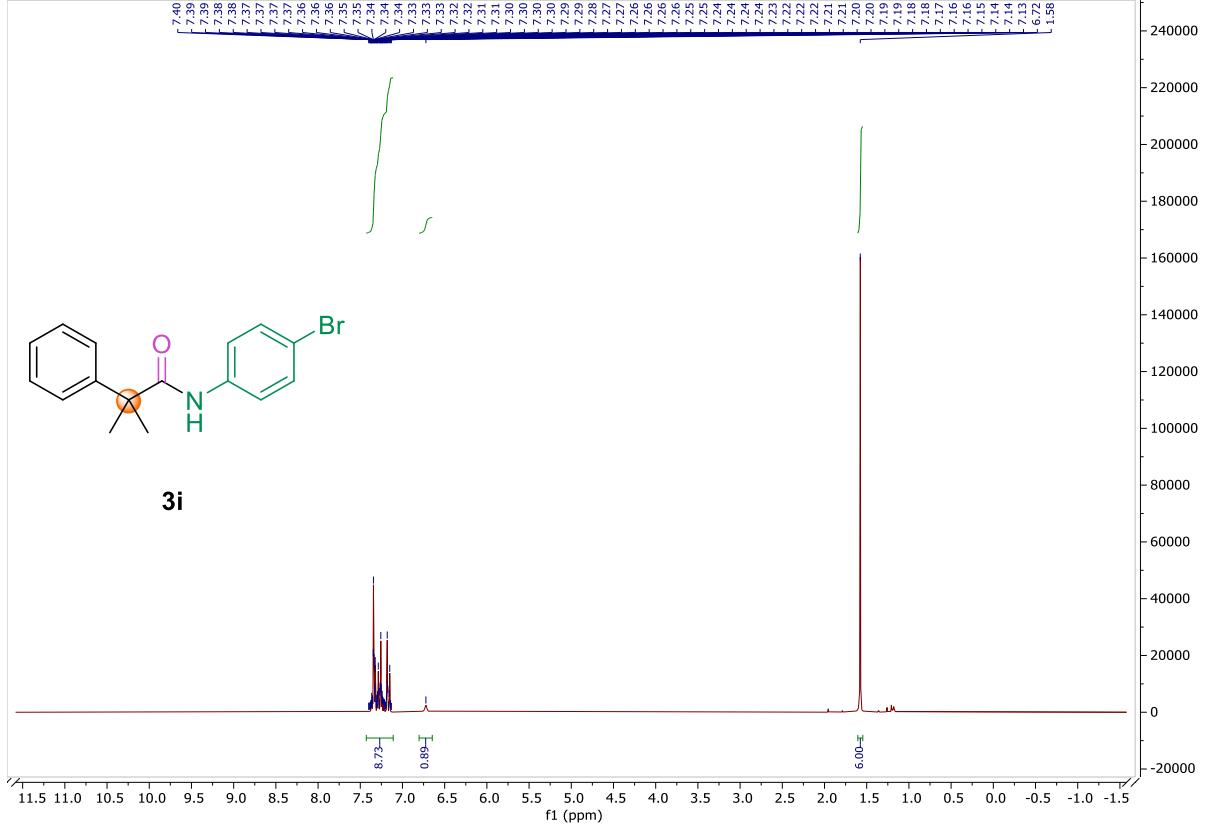

231010.f303.11.fid — Xingwei Gu gxw-195-1 — Au13C CDCl3 {C:\Bruker\TopSpin3.6.2} 2310 3 - 75 MHz

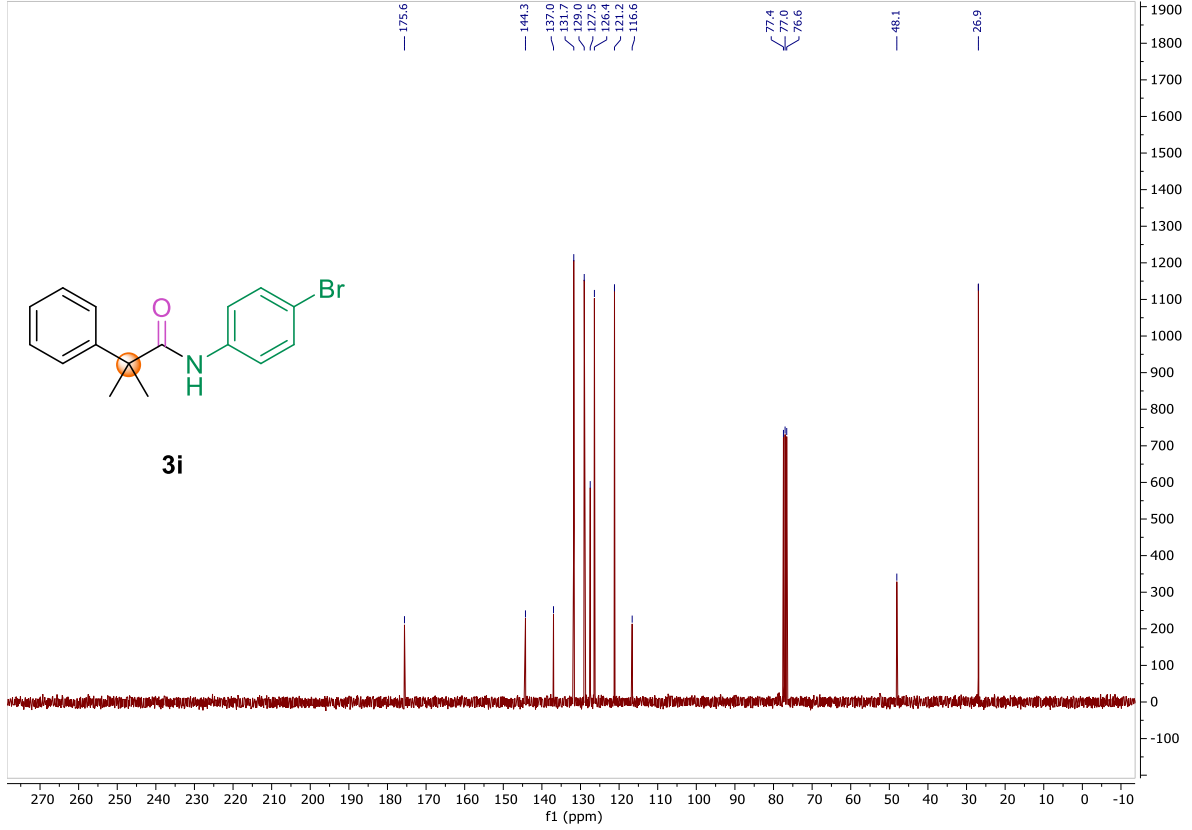

240814.f307.10.fid — Xingwei Gu gxw-185-4 — Au1H CDCl3 {C:\Bruker\TopSpin3.6.2} 2408 7 - 300 MHz

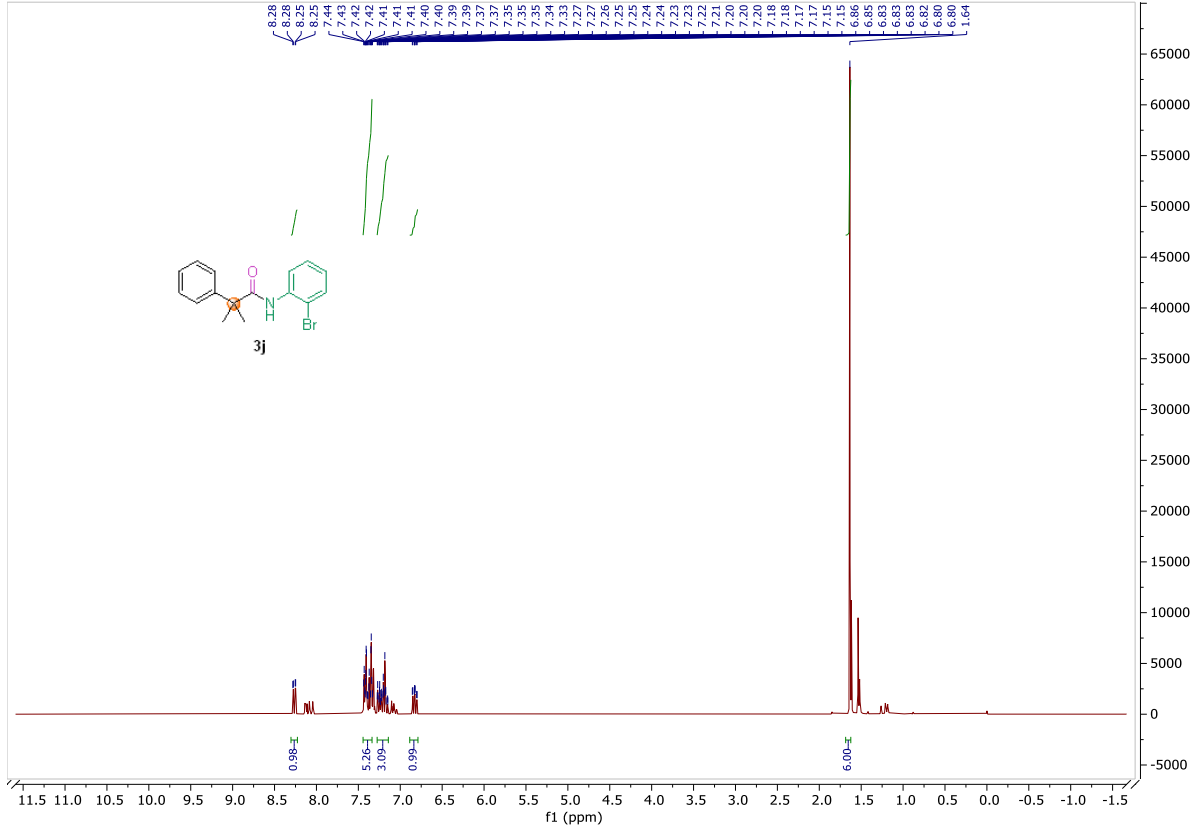

240814.f307.11.fid — Xingwei Gu gxw-185-4 — Au13C CDCl3 {C:\Bruker\TopSpin3.6.2} 2408 7 - 75 MHz

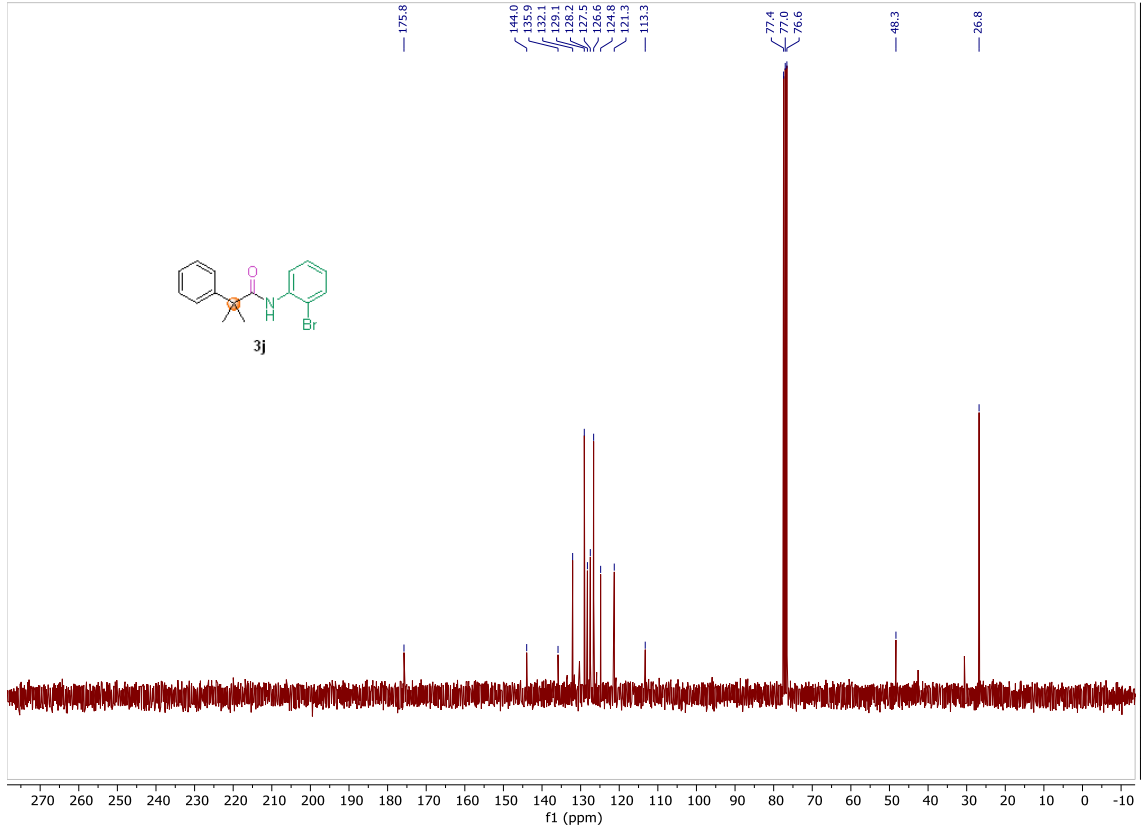

230904.320.10.fid — Xingwei Gu, gxw-185-8 — Au1H CDCI3 {C:\Bruker\TopSpin3.6.2} 2309 20 - 300 MHz

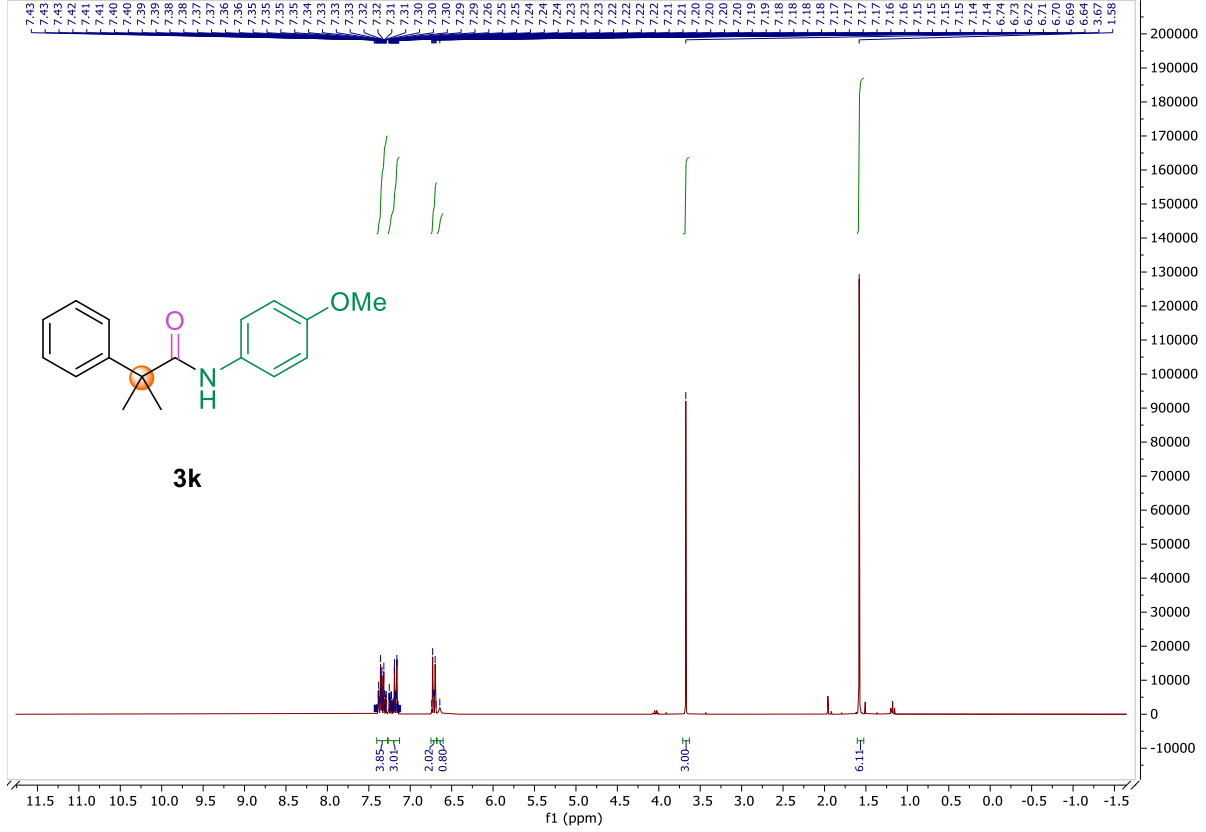

230904.320.11.fid — Xingwei Gu, gxw-185-8 — Au13C CDCI3 {C:\Bruker\TopSpin3.6.2} 2309 20 - 75 MHz

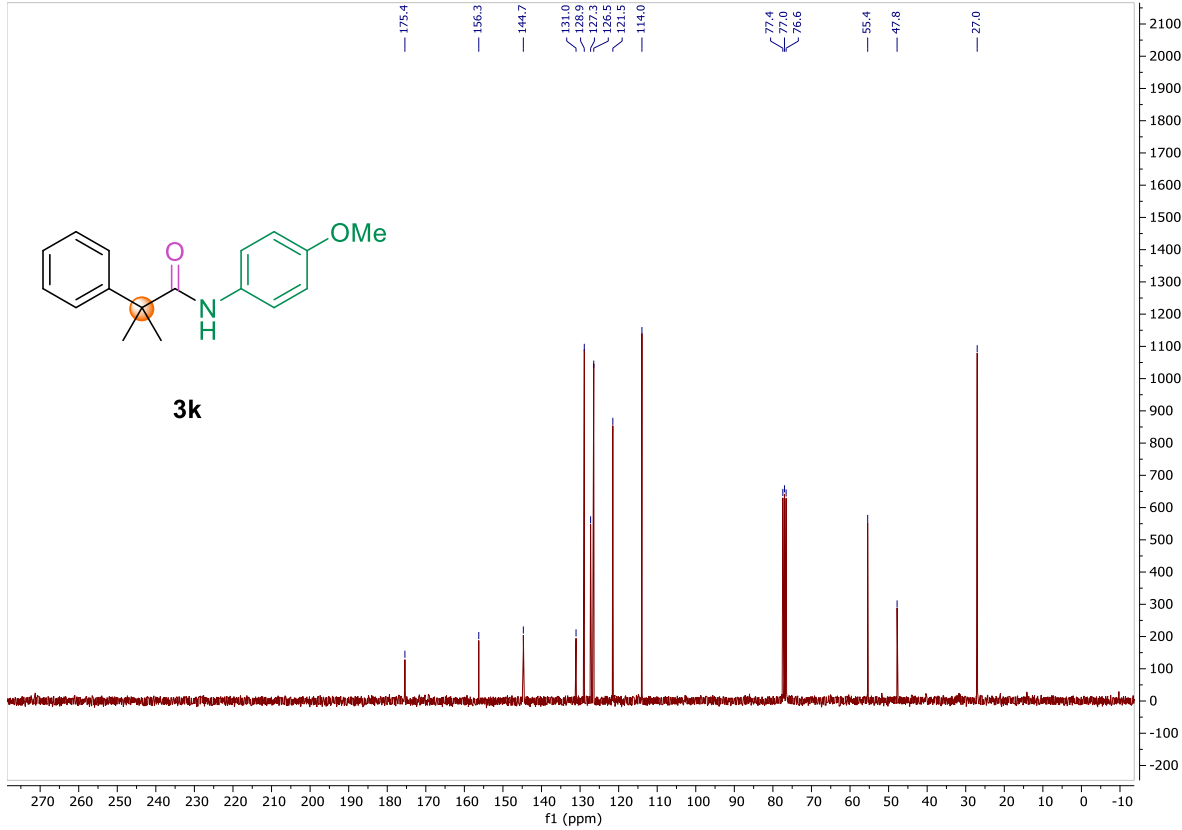

230919.f313.10.fid — Xingwei Gu gxw-185-17 — PROTON CDCl3 {C:\Bruker\TopSpin3.6.2} 2309 13 - 300 MHz

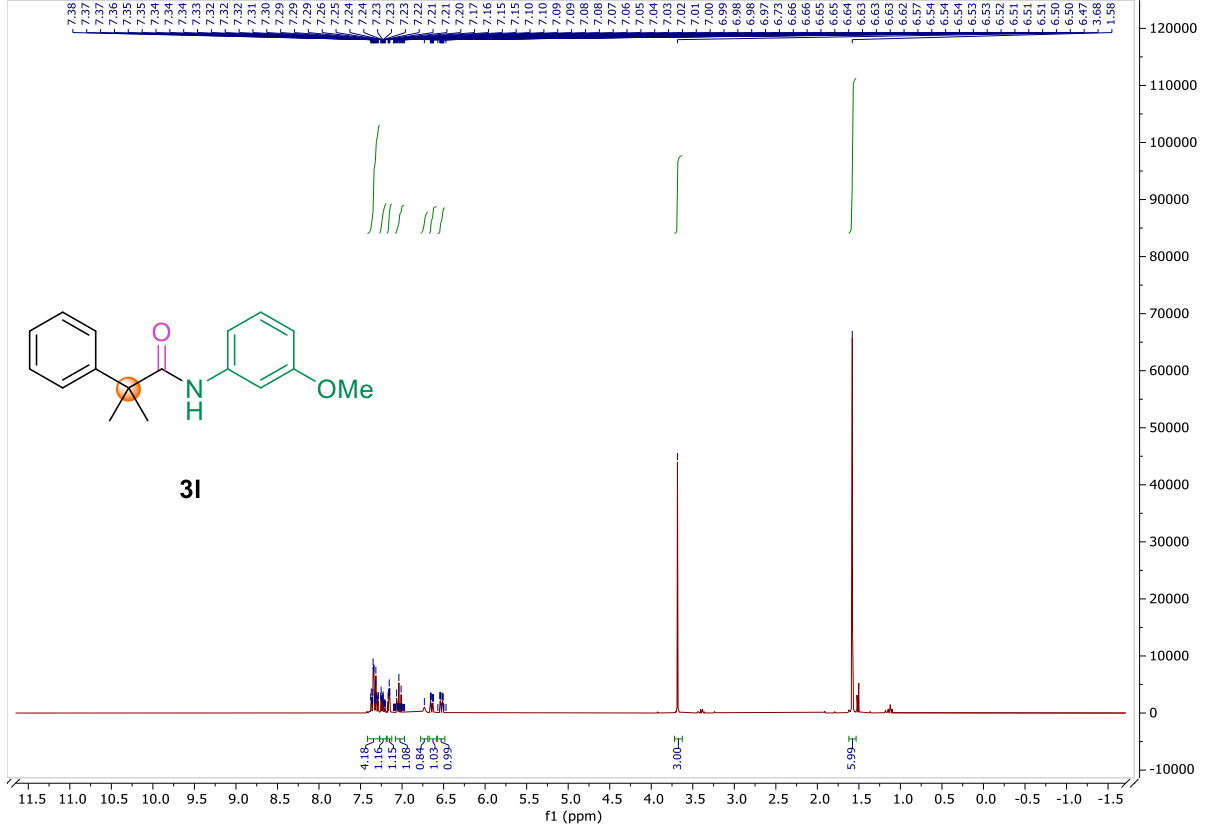

230919.f313.11.fid — Xingwei Gu gxw-185-17 — Au13C CDCl3 {C:\Bruker\TopSpin3.6.2} 2309 13 - 75 MHz

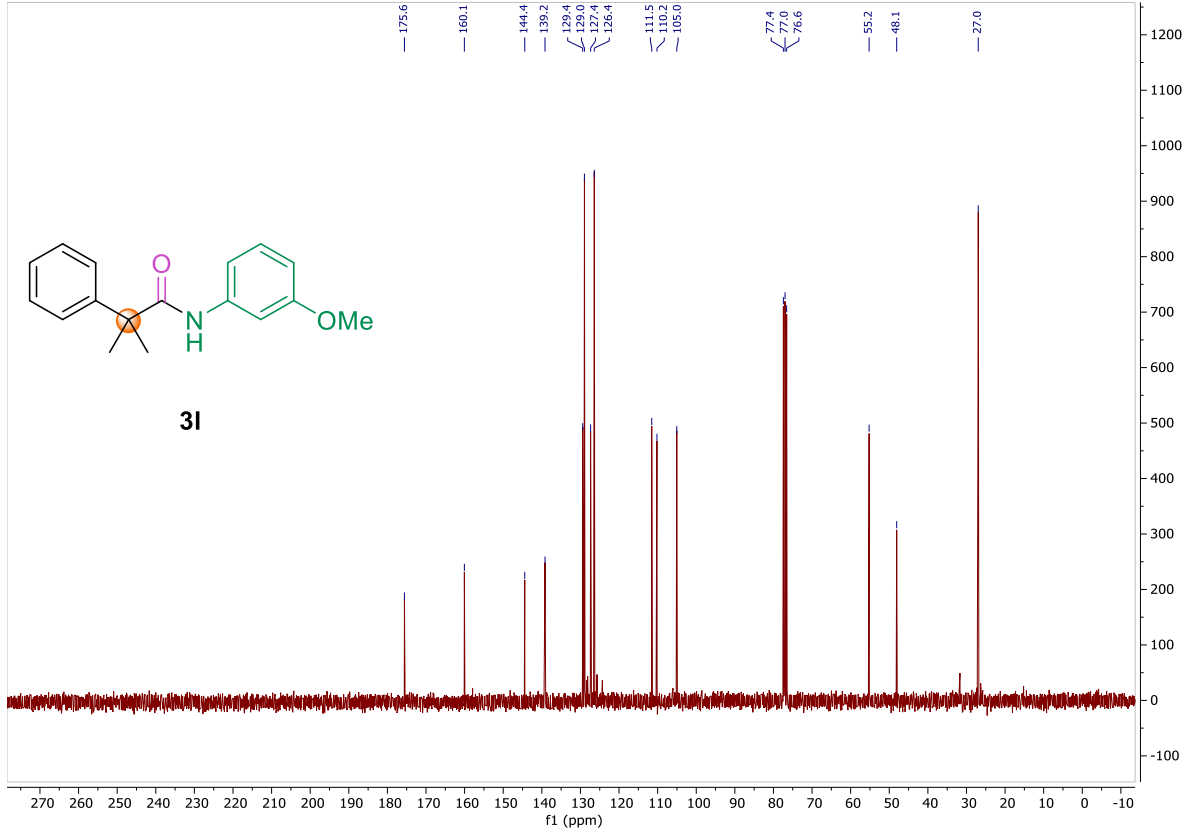



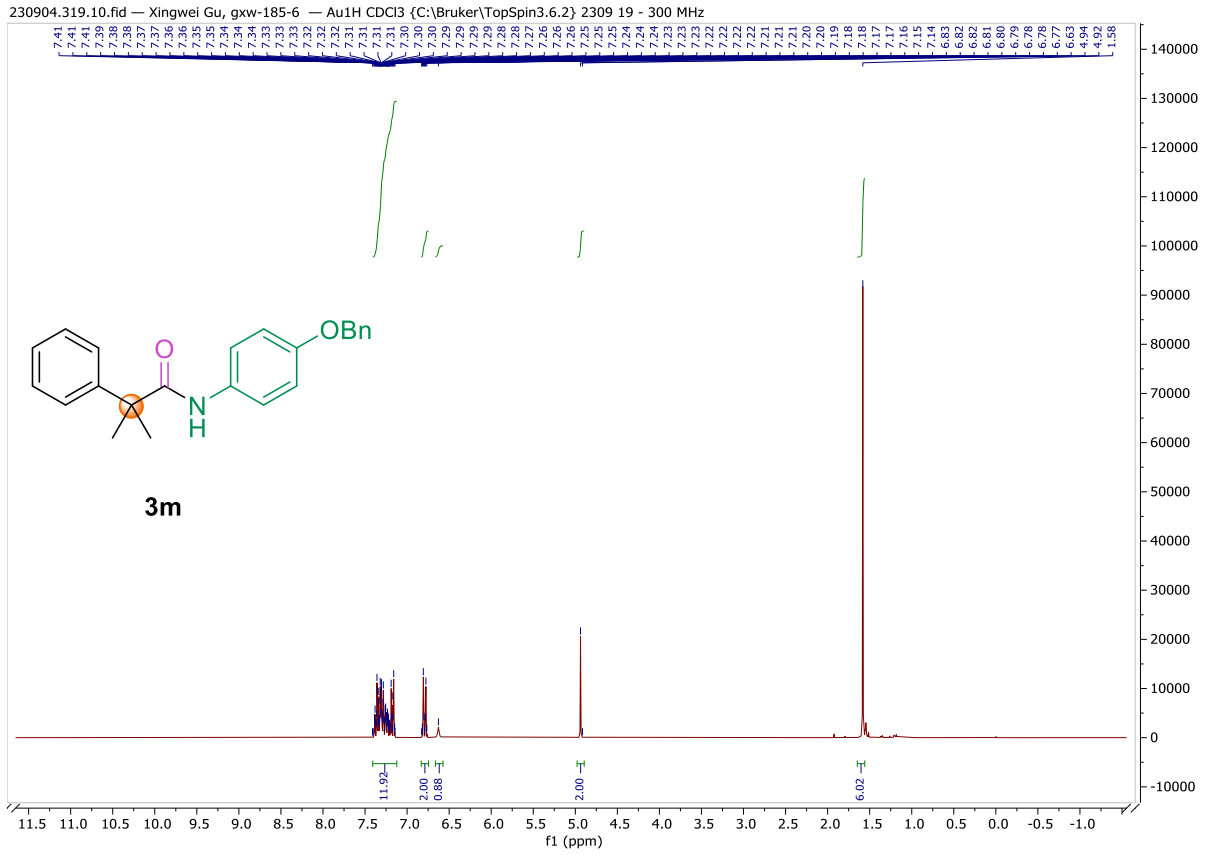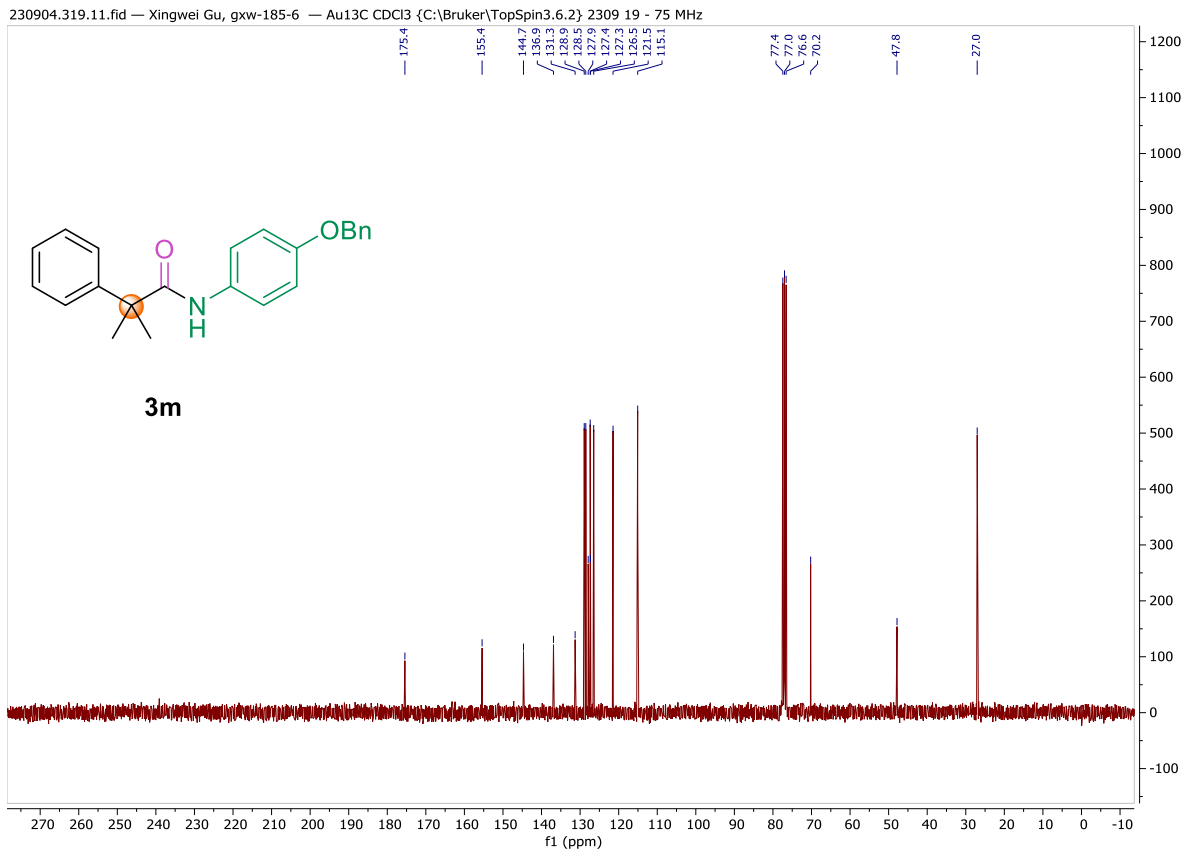

230914.330.10.fid — Xingwei Gu, gxw-184-15 — Au1H CDCl3 {C:\Bruker\TopSpin3.6.2} 2309 30 - 300 MHz

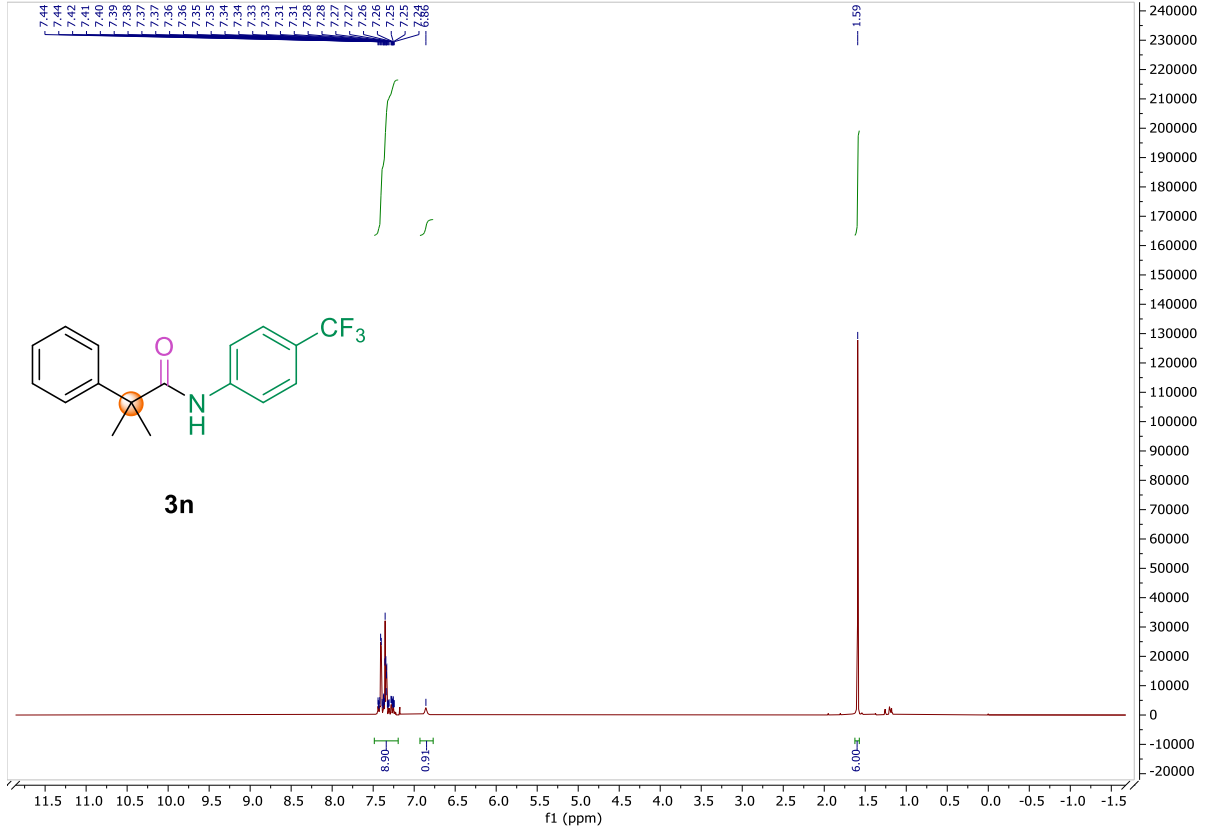

230914.330.11.fid — Xingwei Gu, gxw-184-15 — Au13C CDCl3 {C:\Bruker\TopSpin3.6.2} 2309 30 - 75 MHz

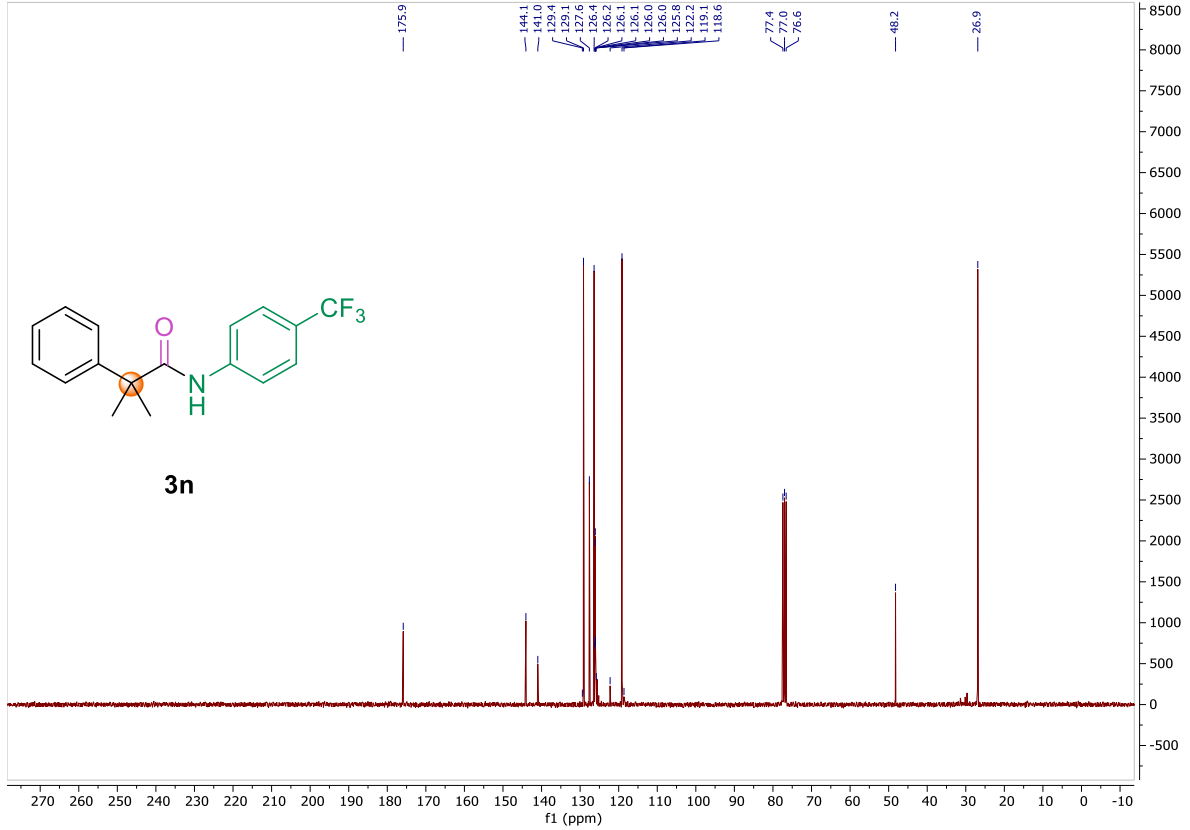

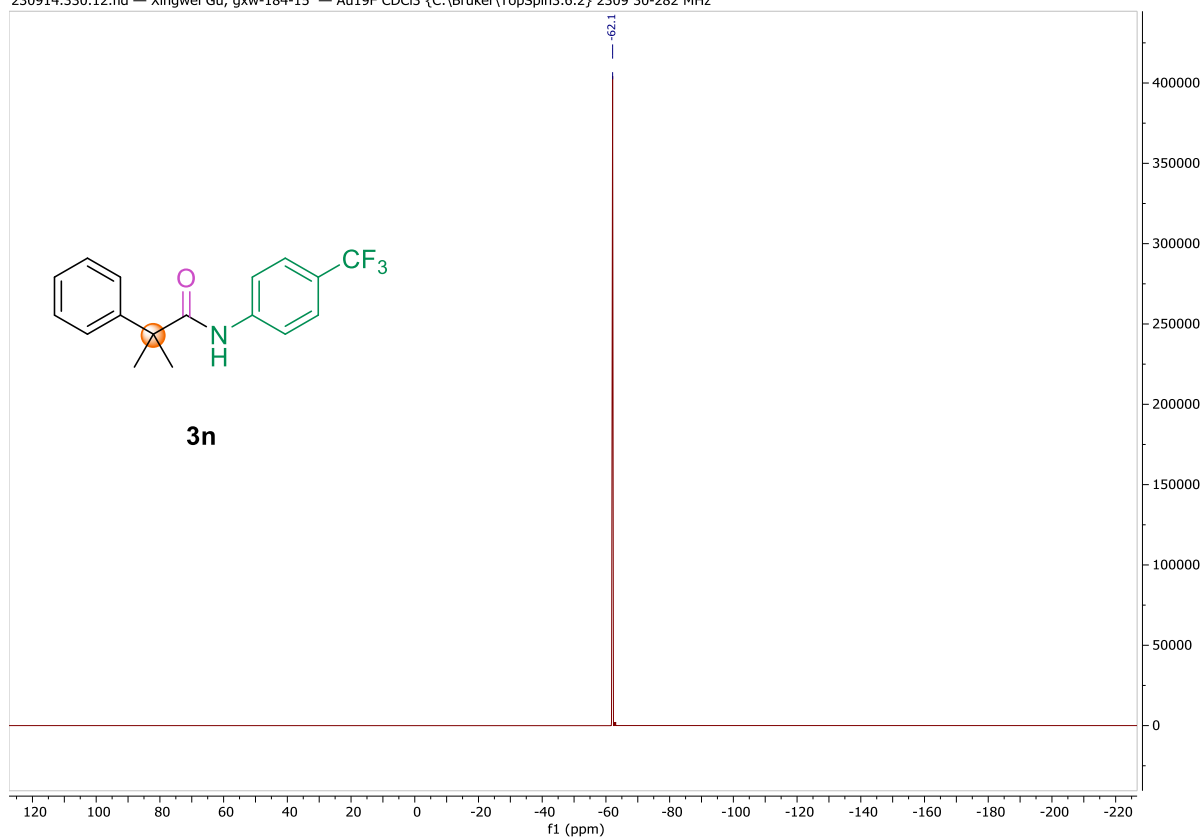

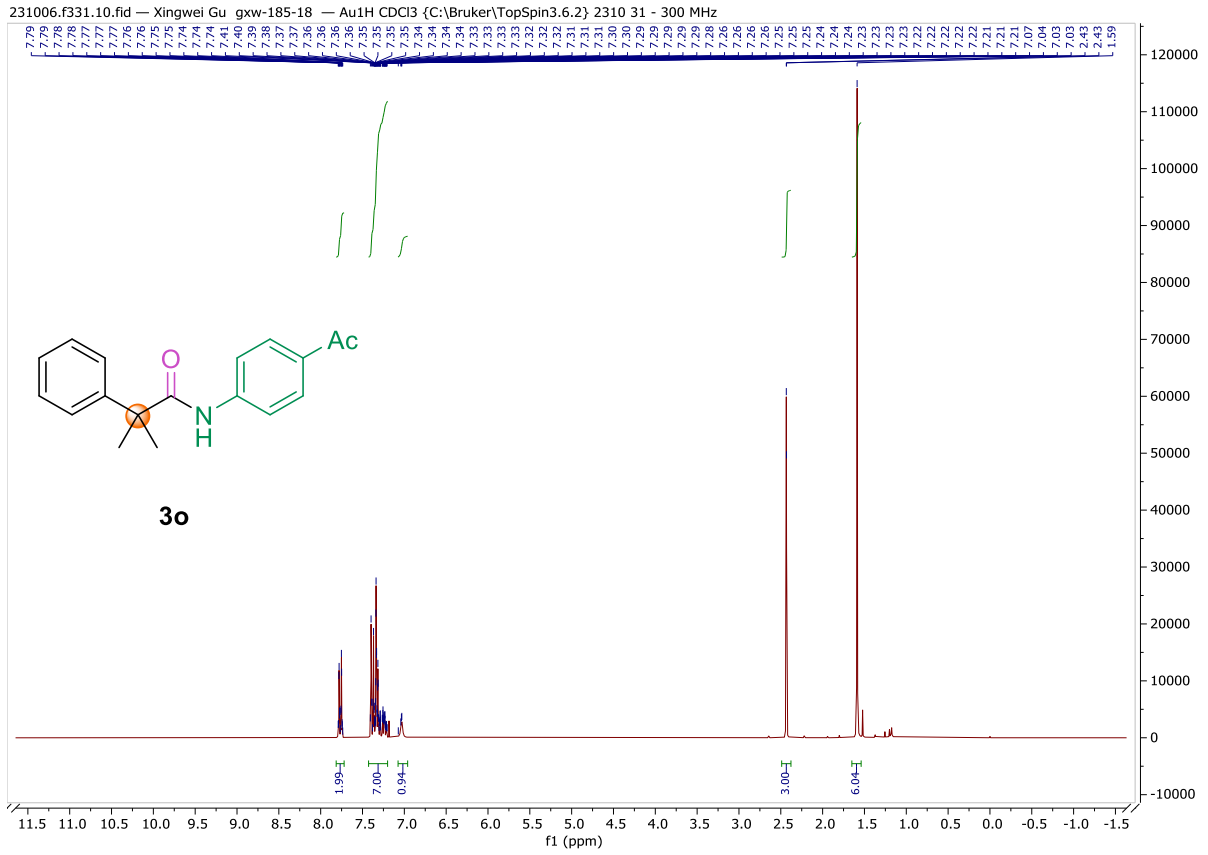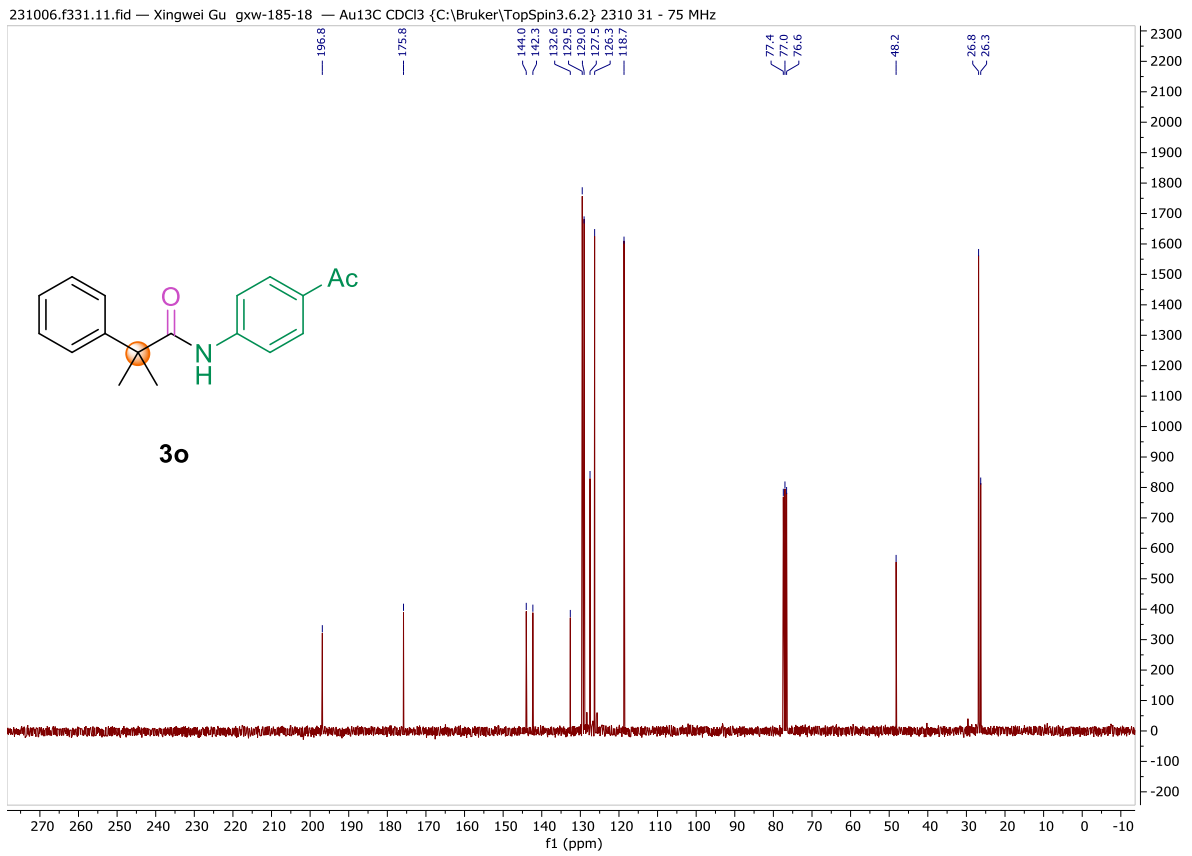

231017.f305.10.fid — Xingwei Gu gxw-195-4 — Au1H CDCl3 {C:\Bruker\TopSpin3.6.2} 2310 5 - 300 MHz

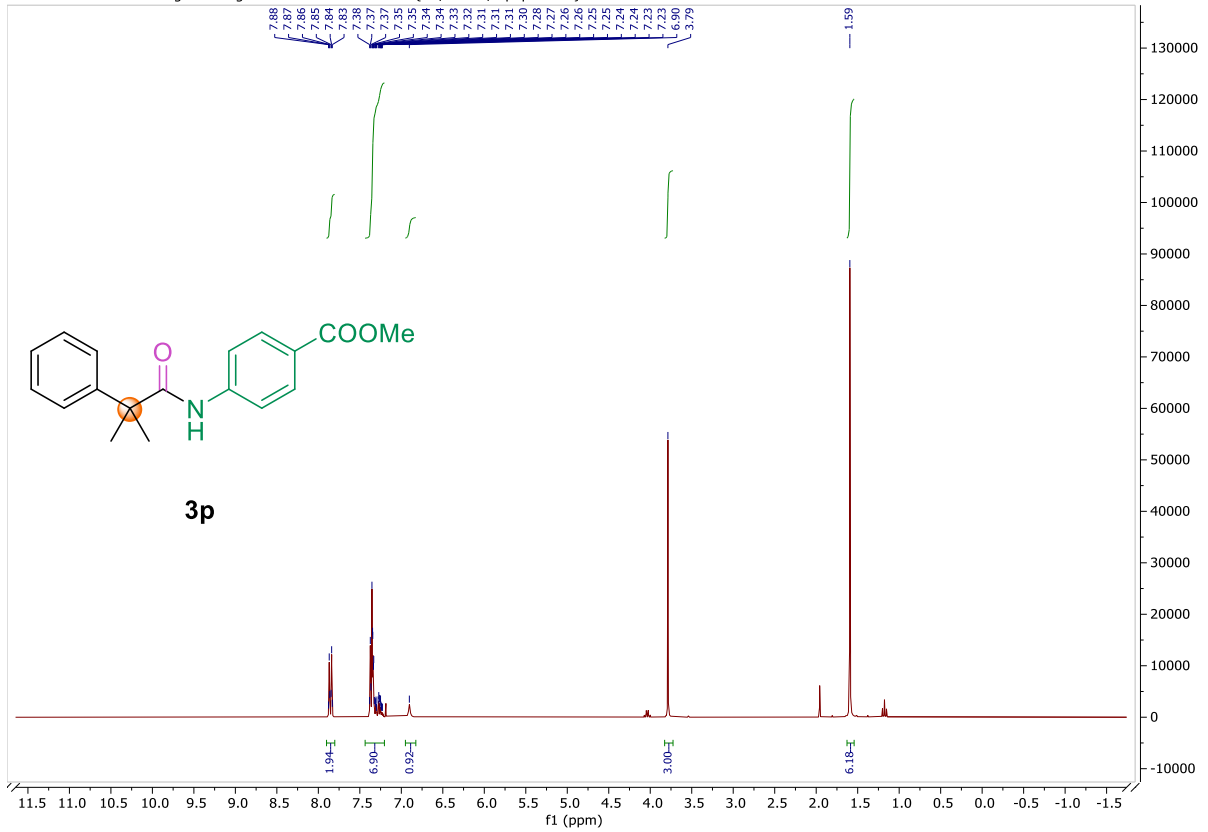

231017.f305.11.fid — Xingwei Gu gxw-195-4 — Au13C CDCl3 {C:\Bruker\TopSpin3.6.2} 2310 5 - 75 MHz

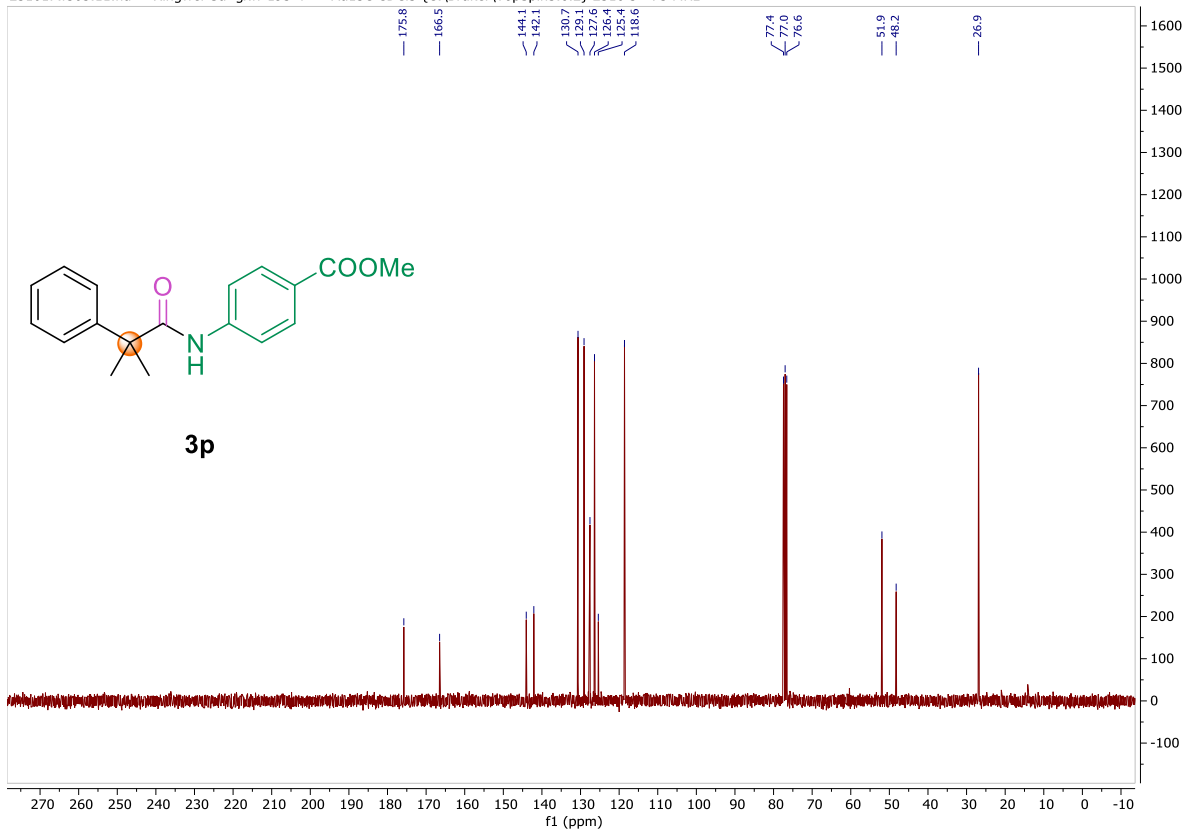

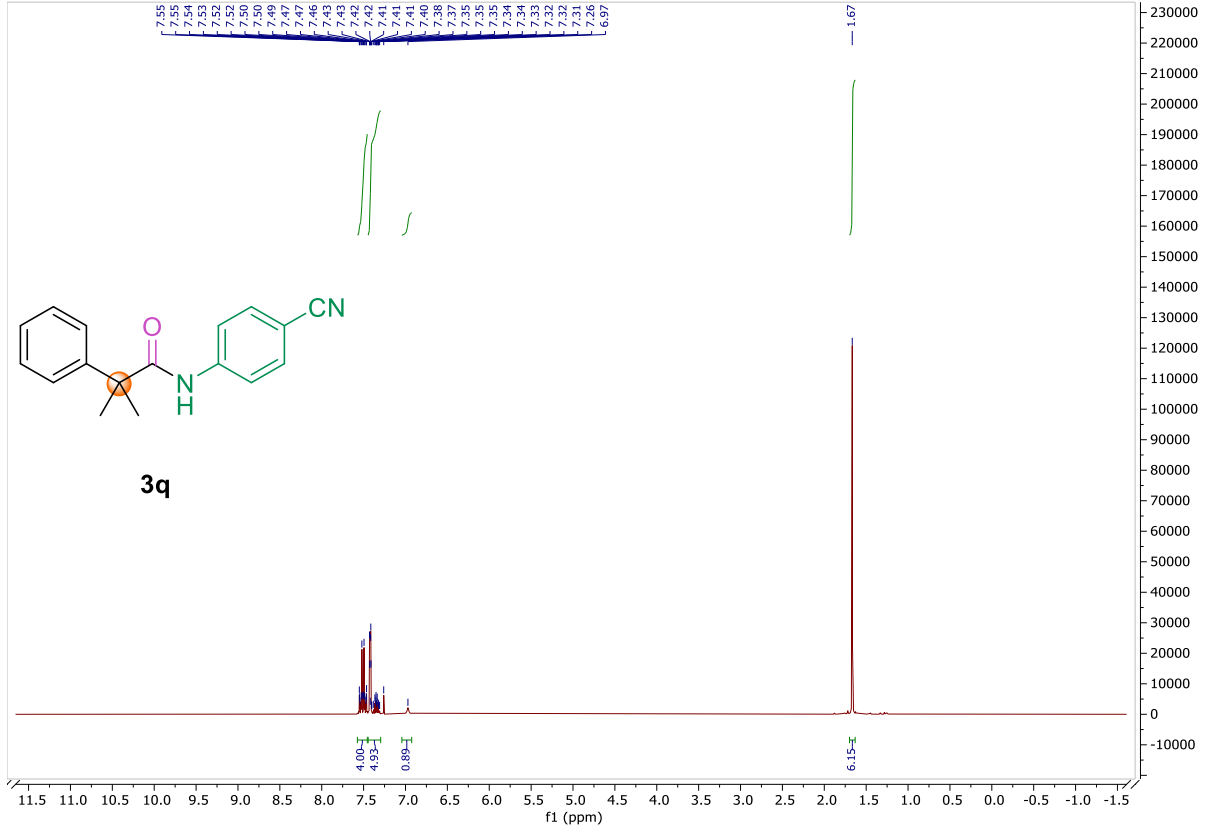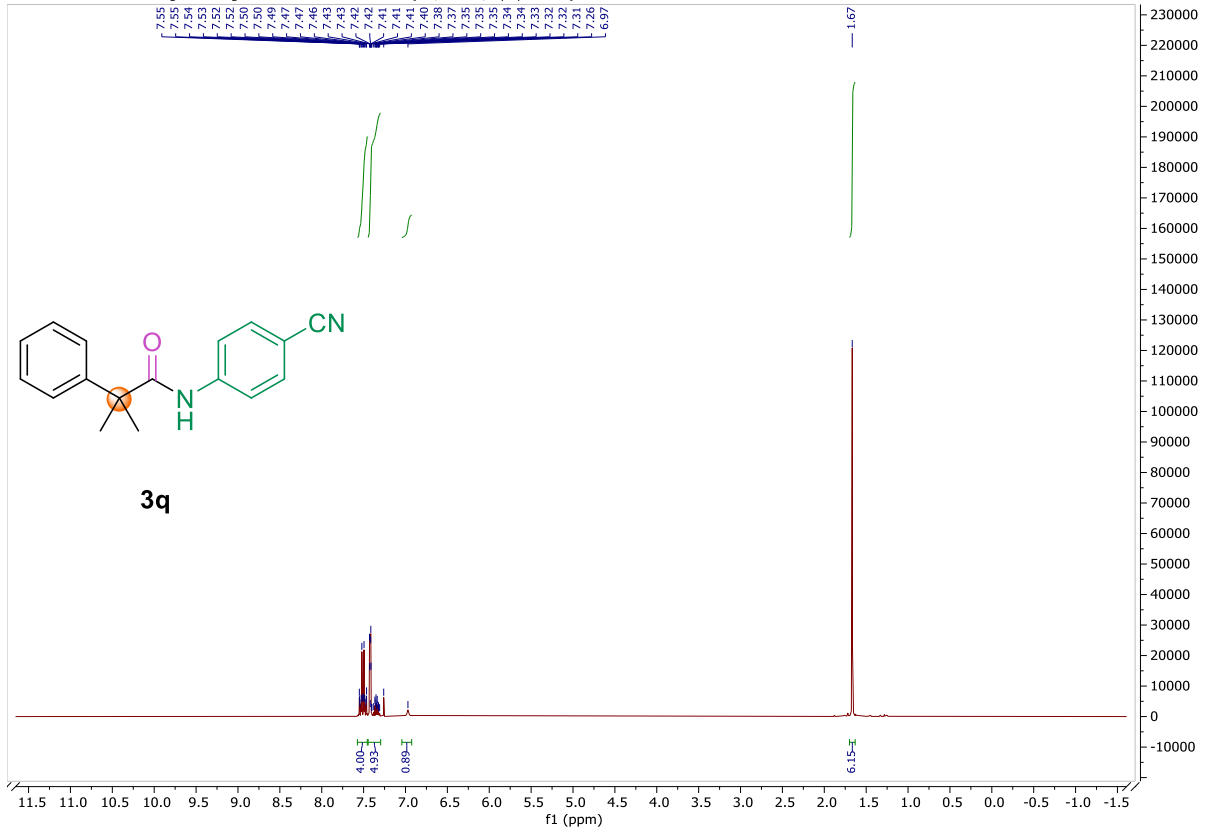

231010.308.10.fid — Xingwei Gu gxw-195-12 — Au1H CDCl3 {C:\Bruker\TopSpin3.6.2} 2310 8 - 300 MHz

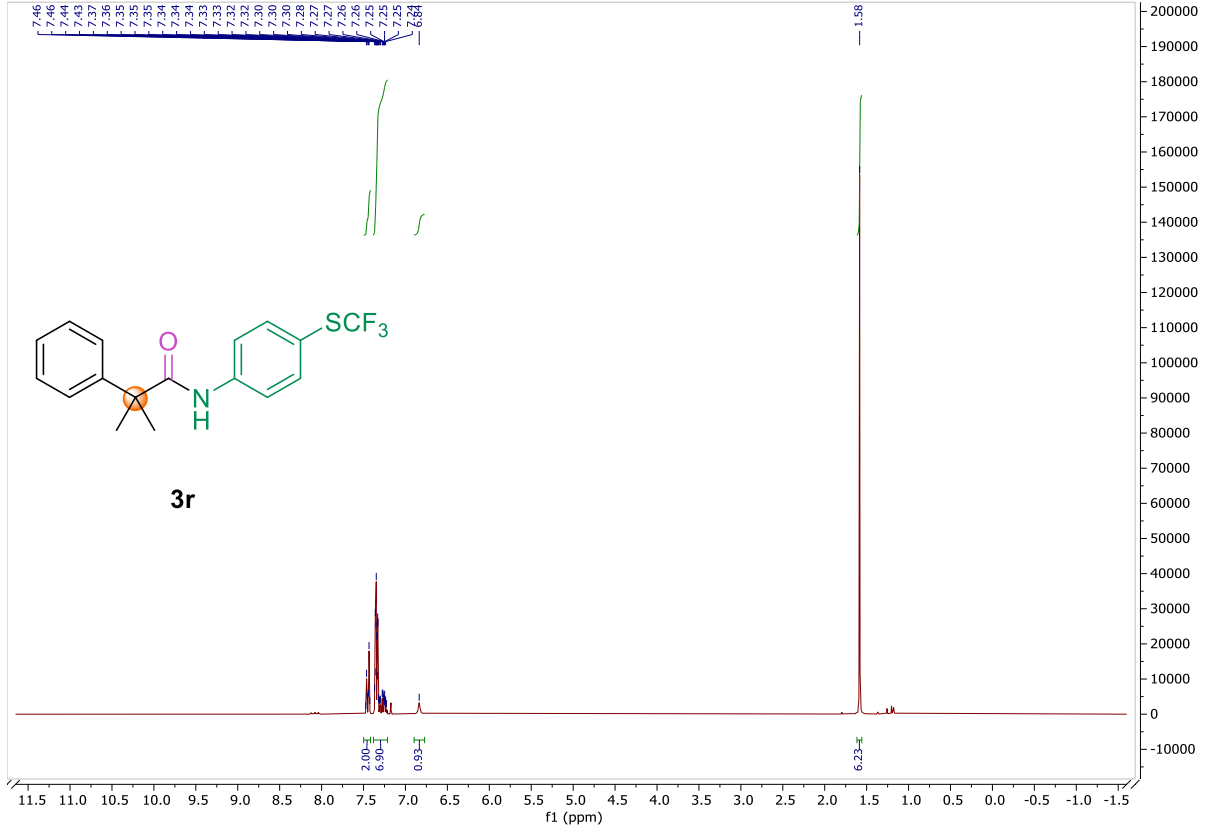

231010.308.11.fid — Xingwei Gu gxw-195-12 — Au13C CDCl3 {C:\Bruker\TopSpin3.6.2} 2310 8 - 75 MHz

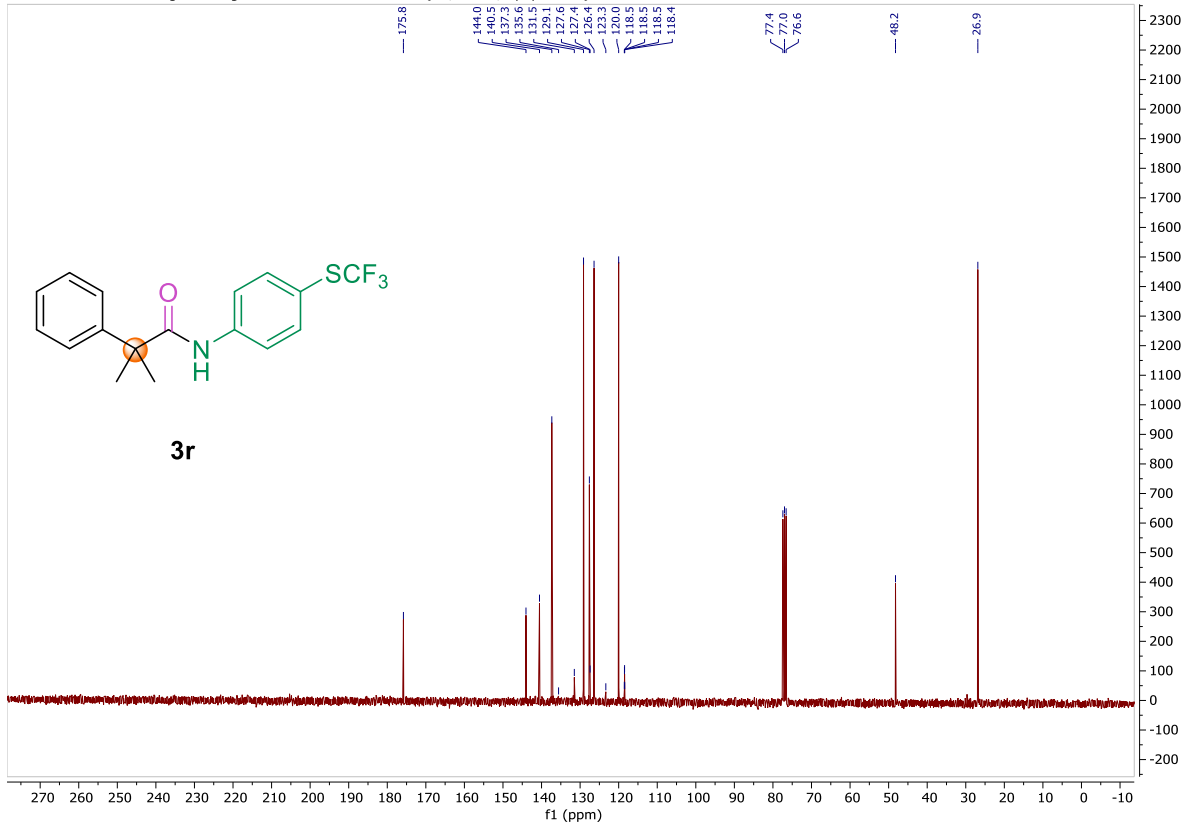

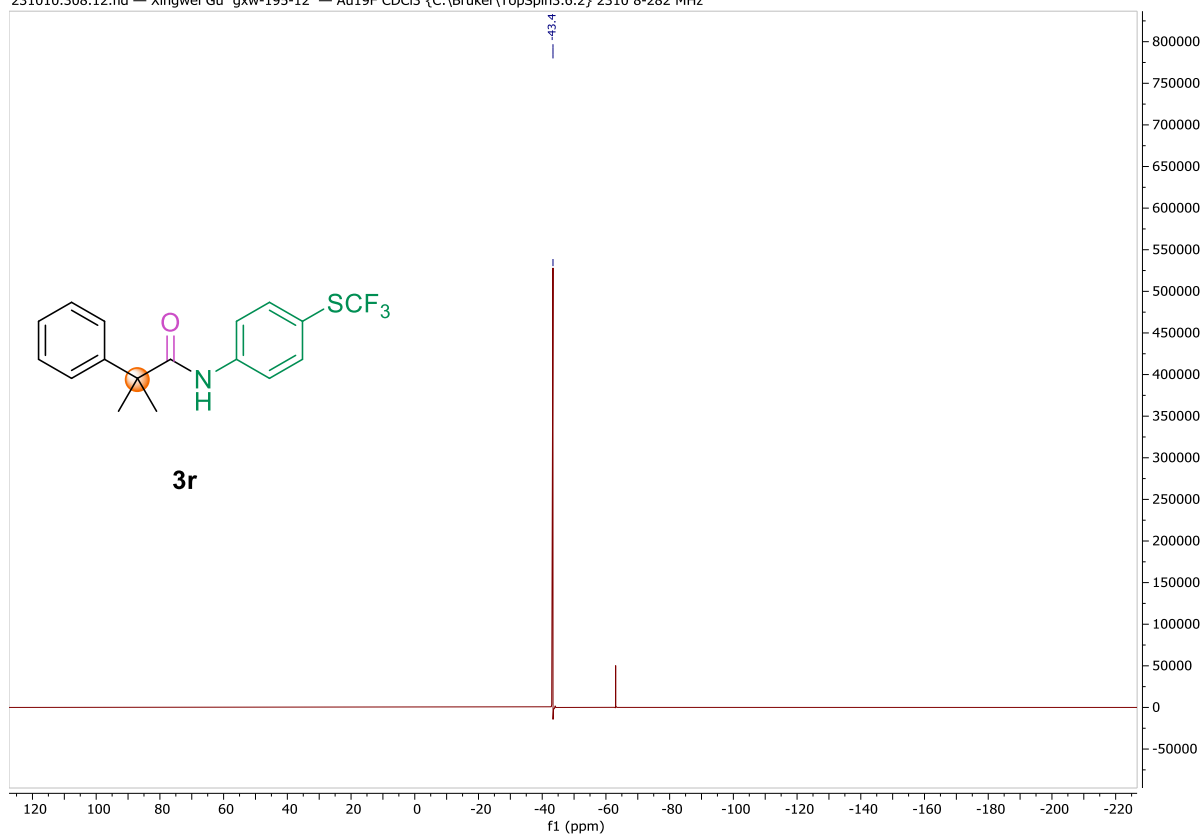



231017.f307.10.fid — Xingwei Gu gxw-195-10 — Au1H CDCl3 {C:\Bruker\TopSpin3.6.2} 2310 7 - 300 MHz

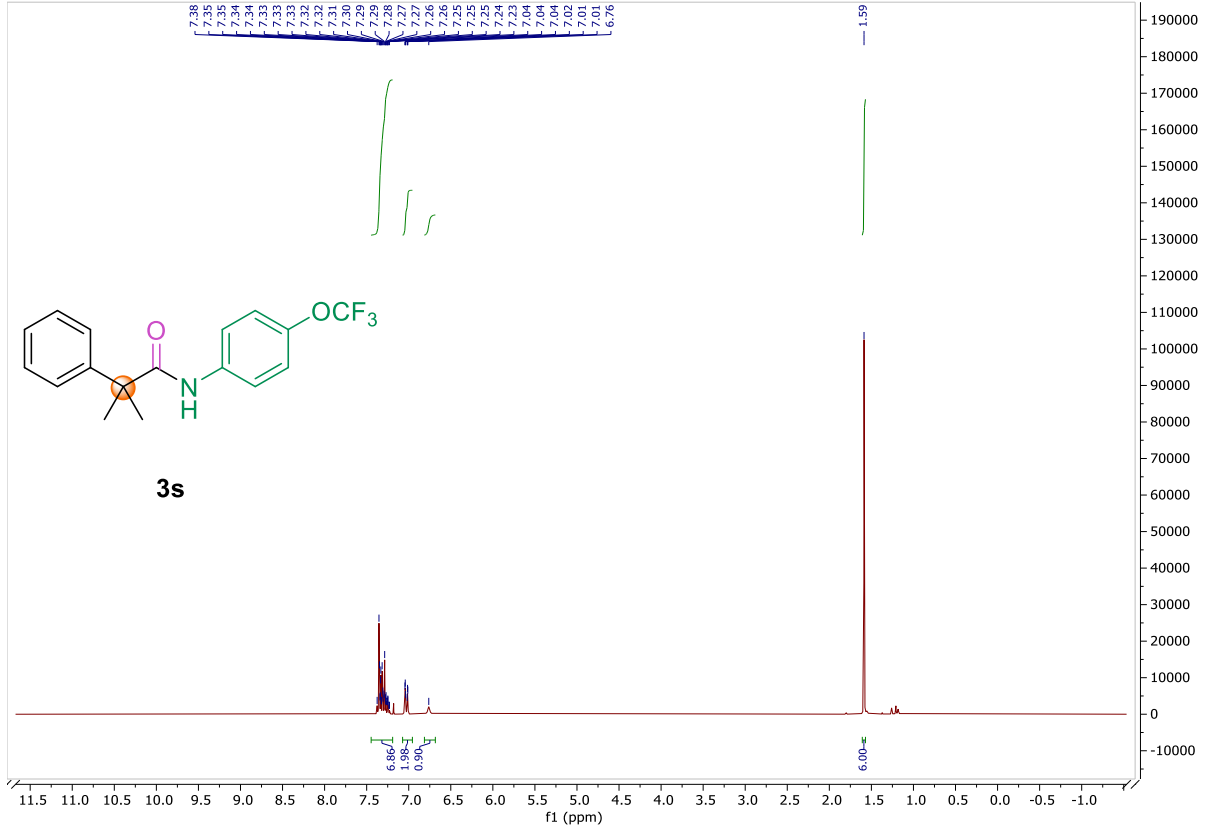

231017.f307.11.fid — Xingwei Gu gxw-195-10 — Au13C CDCl3 {C:\Bruker\TopSpin3.6.2} 2310 7 - 75 MHz

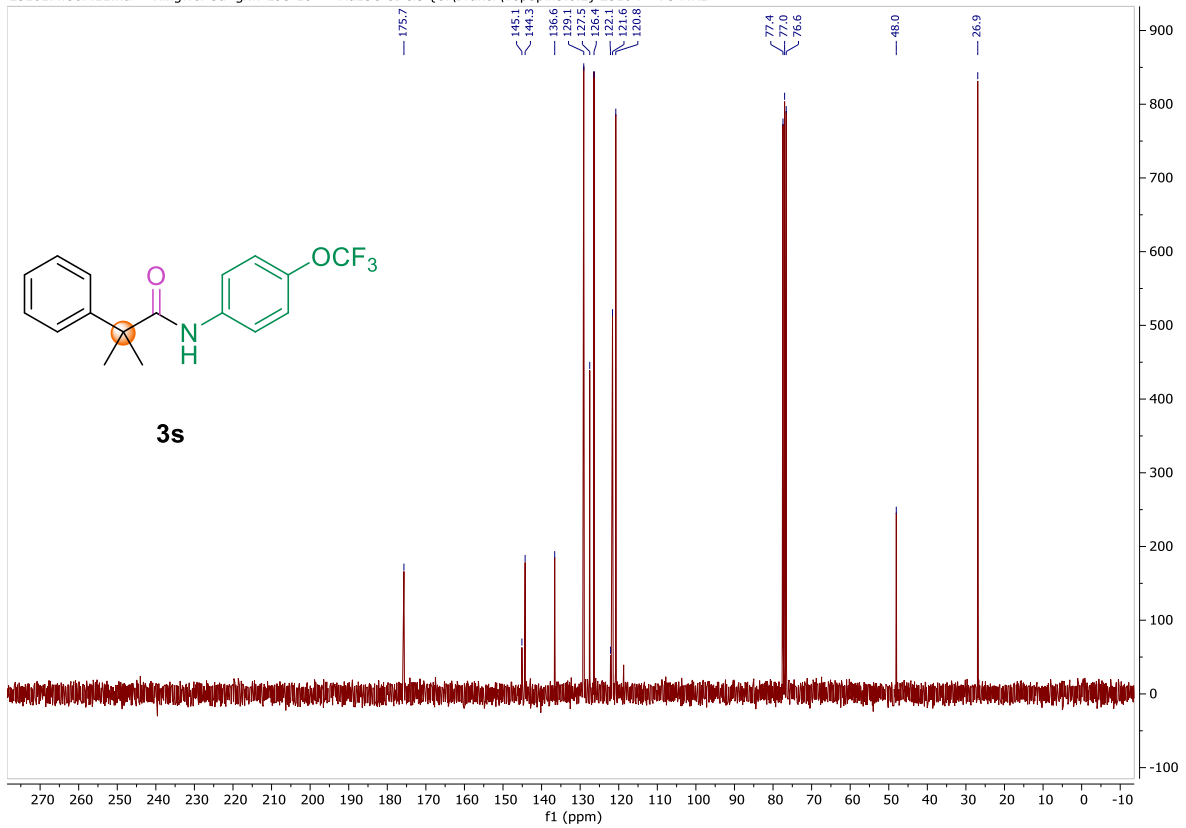

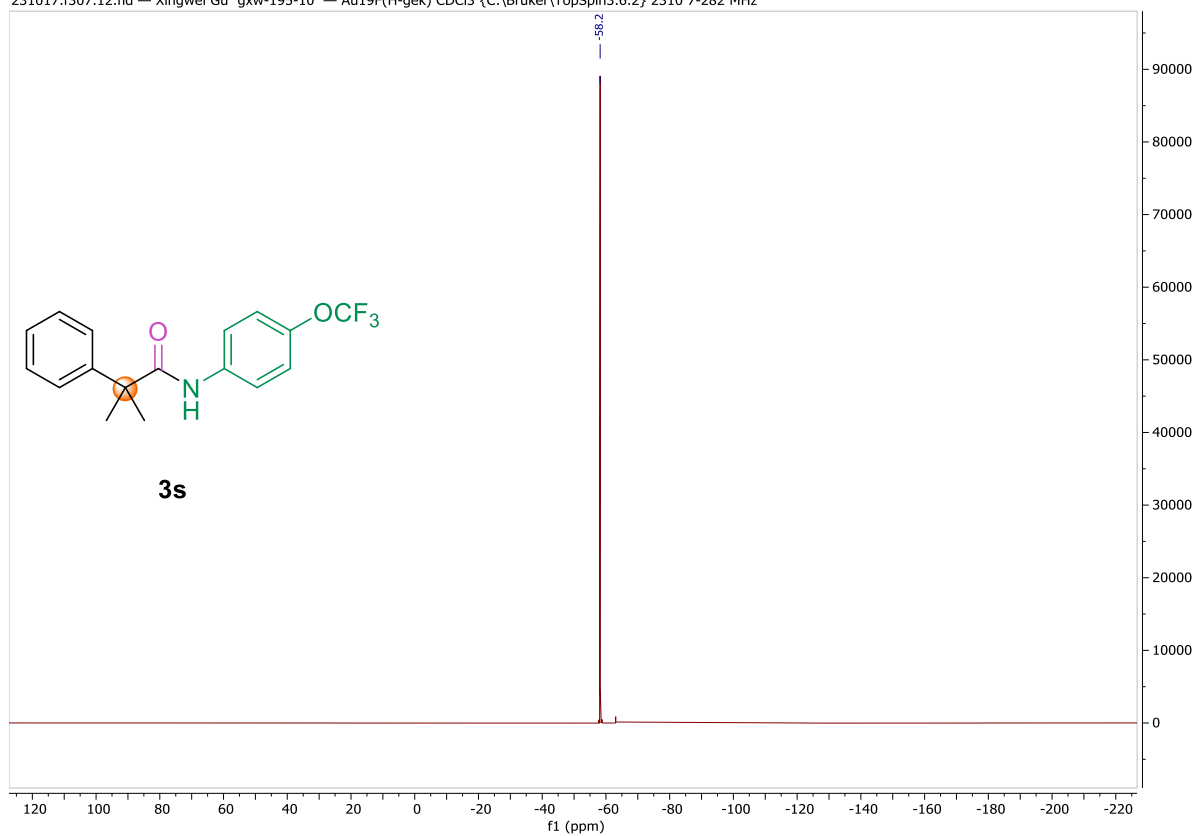

231010.306.10.fid — Xingwei Gu gxw-195-5 — Au1H CDCl3 {C:\Bruker\TopSpin3.6.2} 2310 6 - 300 MHz

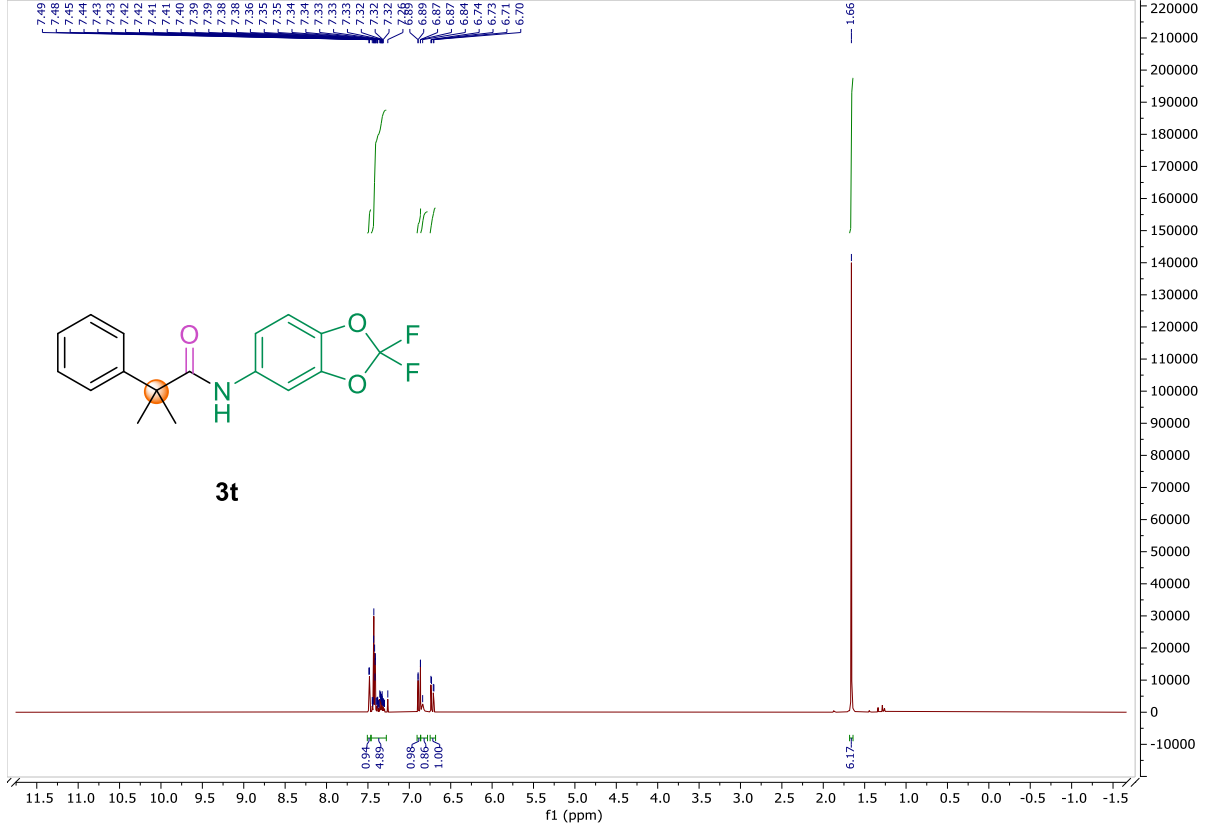

231010.306.11.fid — Xingwei Gu gxw-195-5 — Au13C CDCl3 {C:\Bruker\TopSpin3.6.2} 2310 6 - 75 MHz

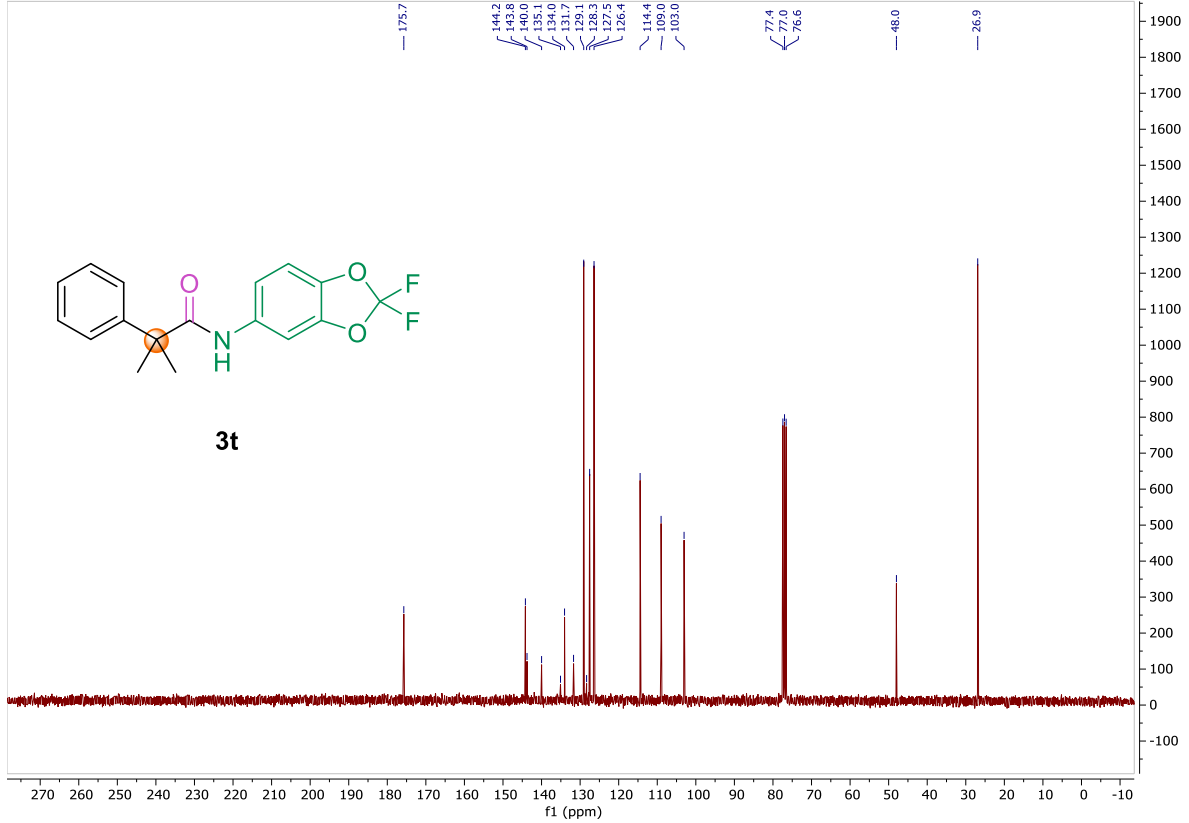

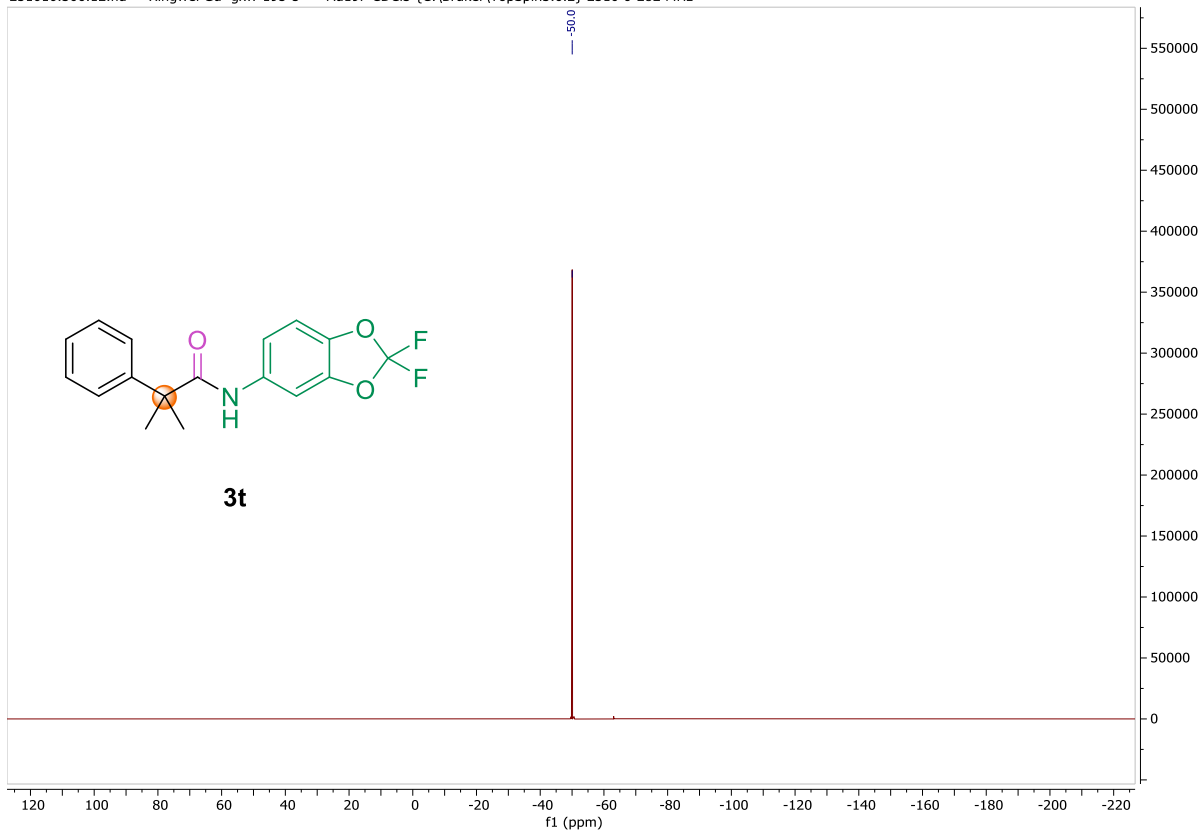

231010.307.10.fid — Xingwei Gu gxw-195-11 — Au1H CDCl3 {C:\Bruker\TopSpin3.6.2} 2310 7 - 300 MHz

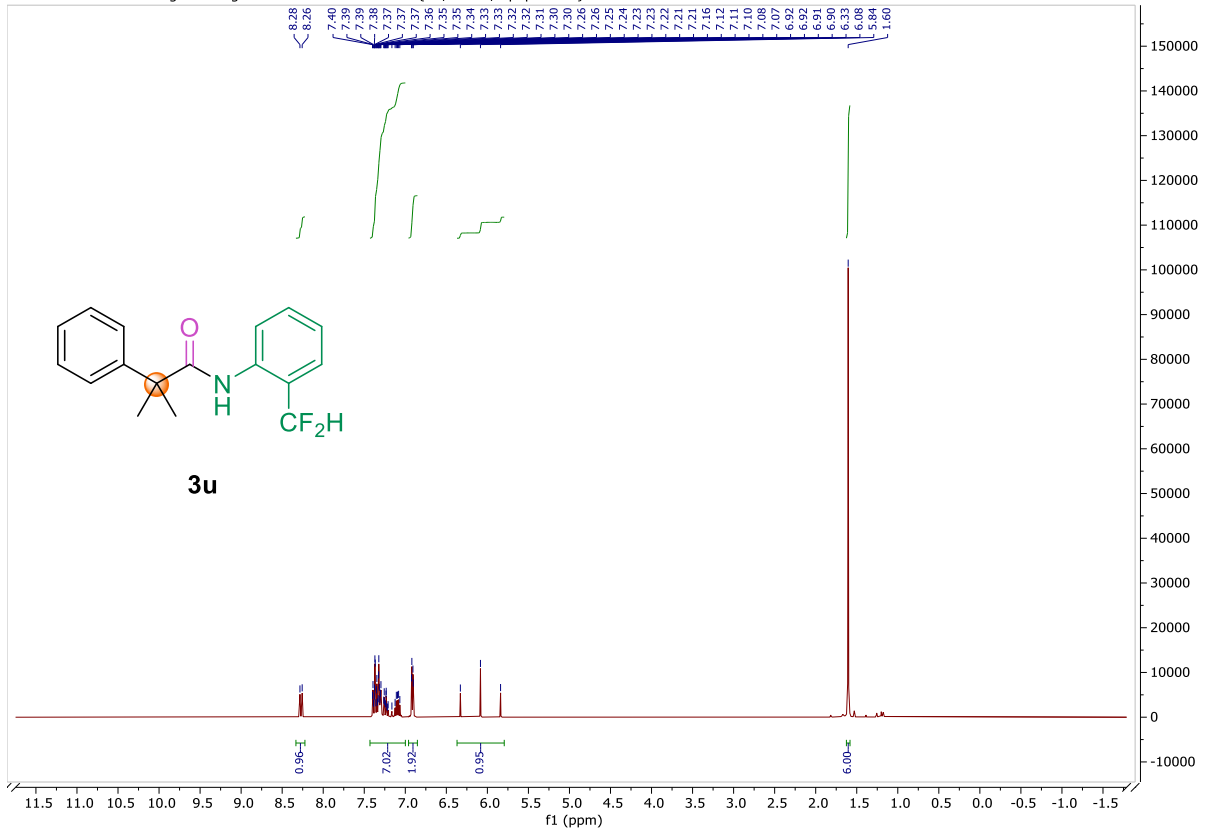

231010.307.11.fid — Xingwei Gu gxw-195-11 — Au13C CDCl3 {C:\Bruker\TopSpin3.6.2} 2310 7 - 75 MHz

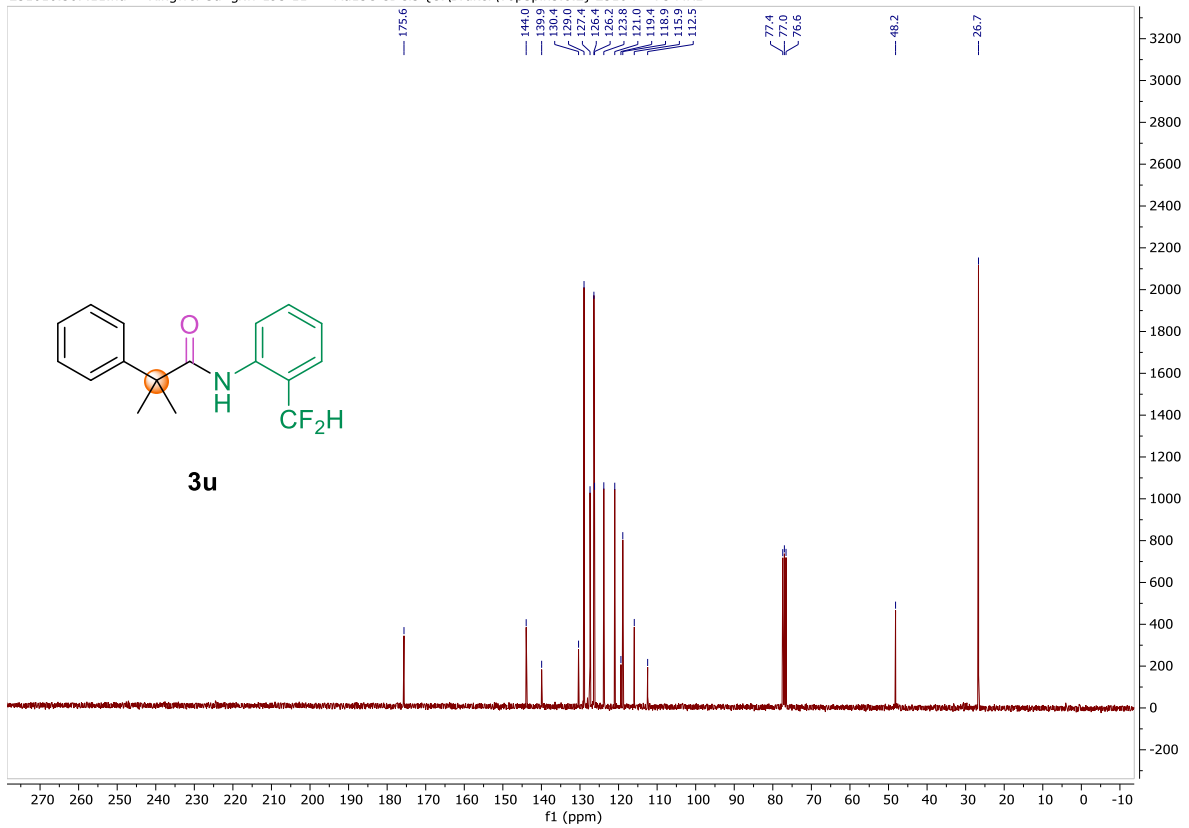

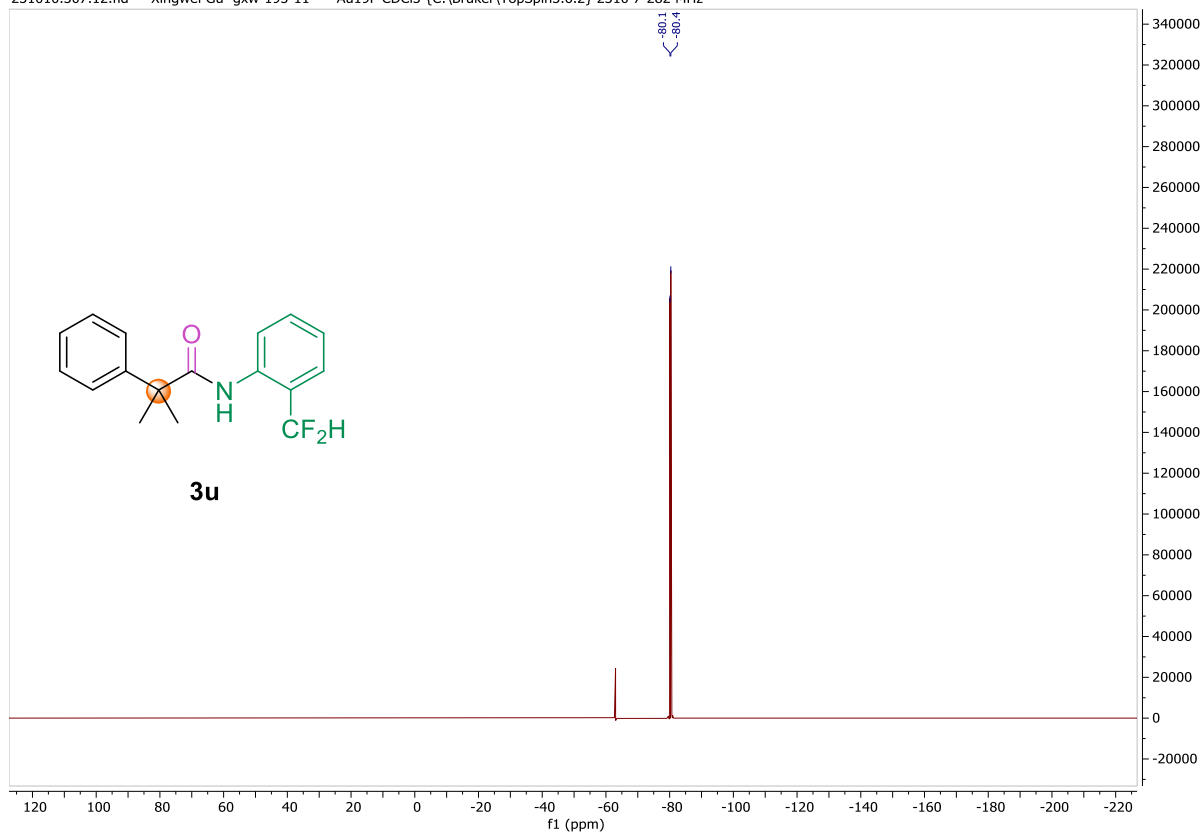

231017.f306.10.fid — Xingwei Gu gxw-195-8 — Au1H CDCl3 {C:\Bruker\TopSpin3.6.2} 2310 6 - 300 MHz

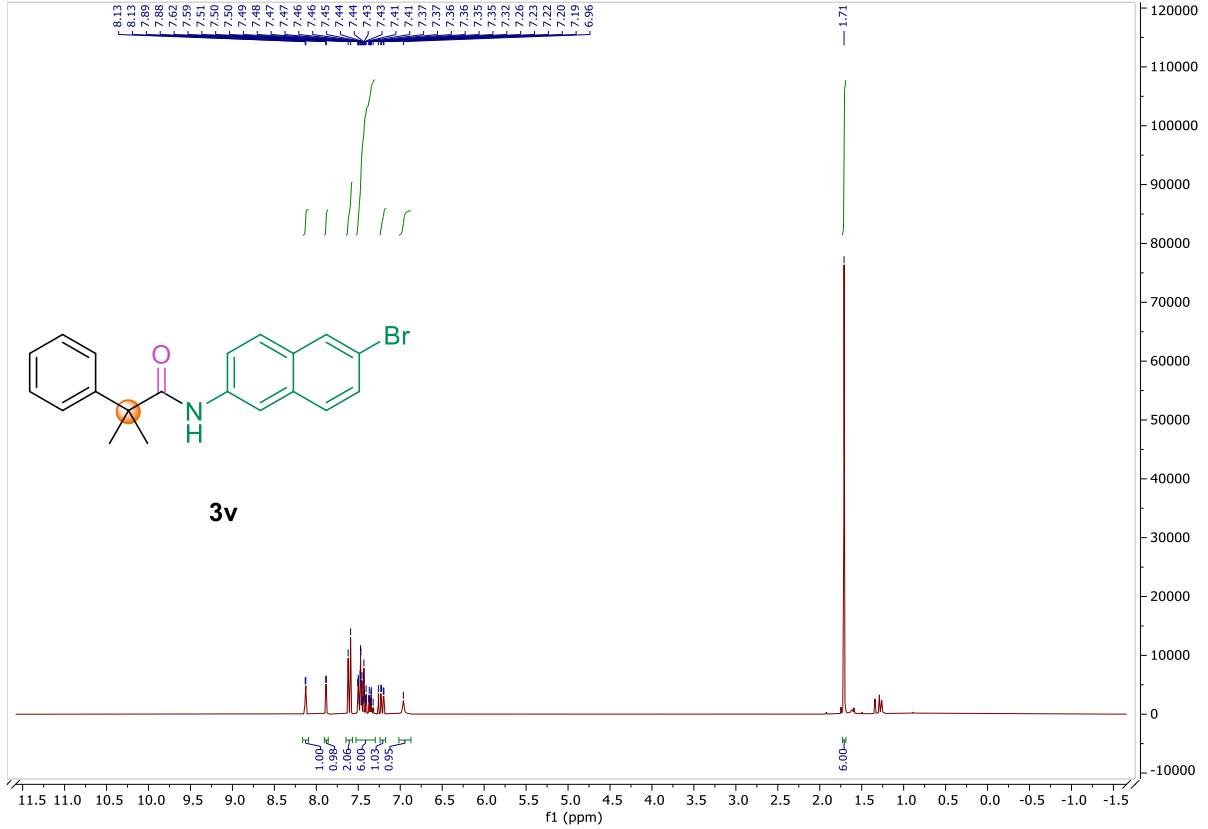

231017.f306.11.fid — Xingwei Gu gxw-195-8 — Au13C CDCl3 {C:\Bruker\TopSpin3.6.2} 2310 6 - 75 MHz

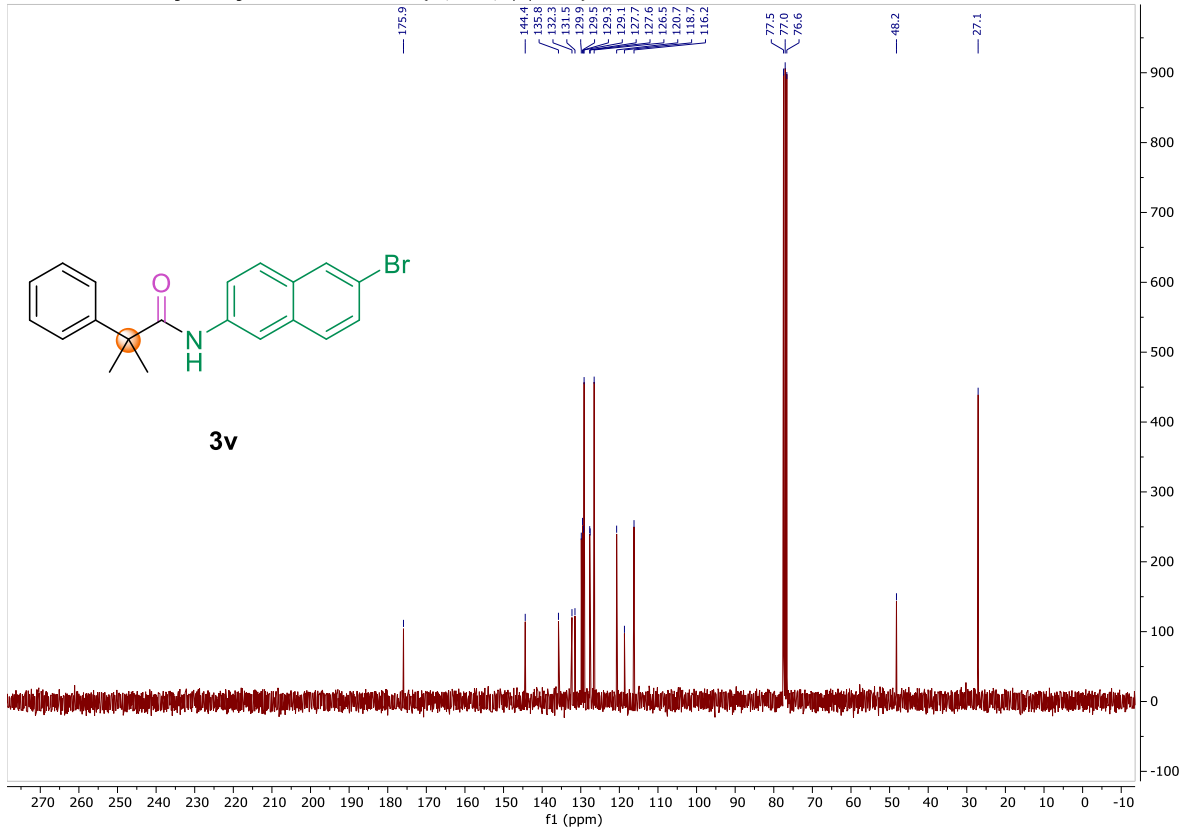

231024.414.10.fid — Xingwei Gu gxw-189-11 — Au1H CDCl3 {C:\Bruker\TopSpin3.6.2} 2310 14 - 300 MHz

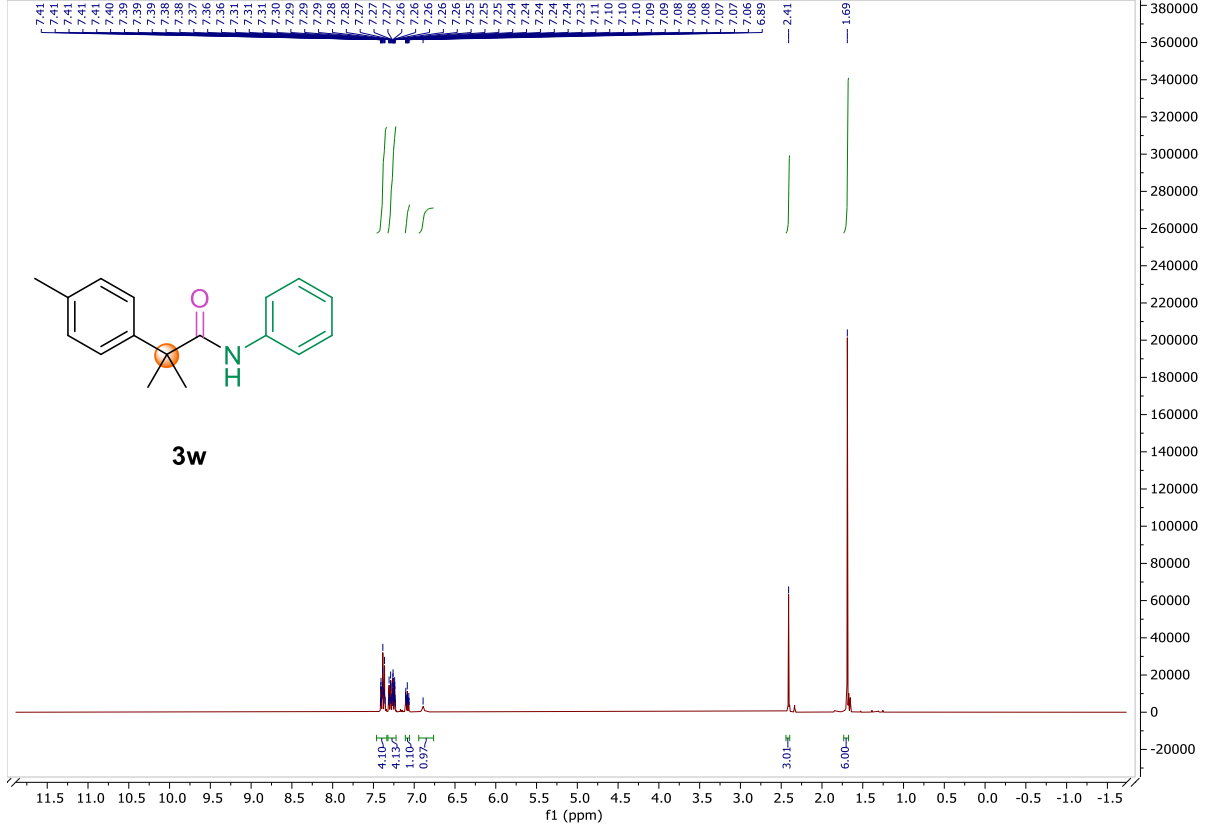

231024.414.11.fid — Xingwei Gu gxw-189-11 — Au13C CDCl3 {C:\Bruker\TopSpin3.6.2} 2310 14 - 75 MHz

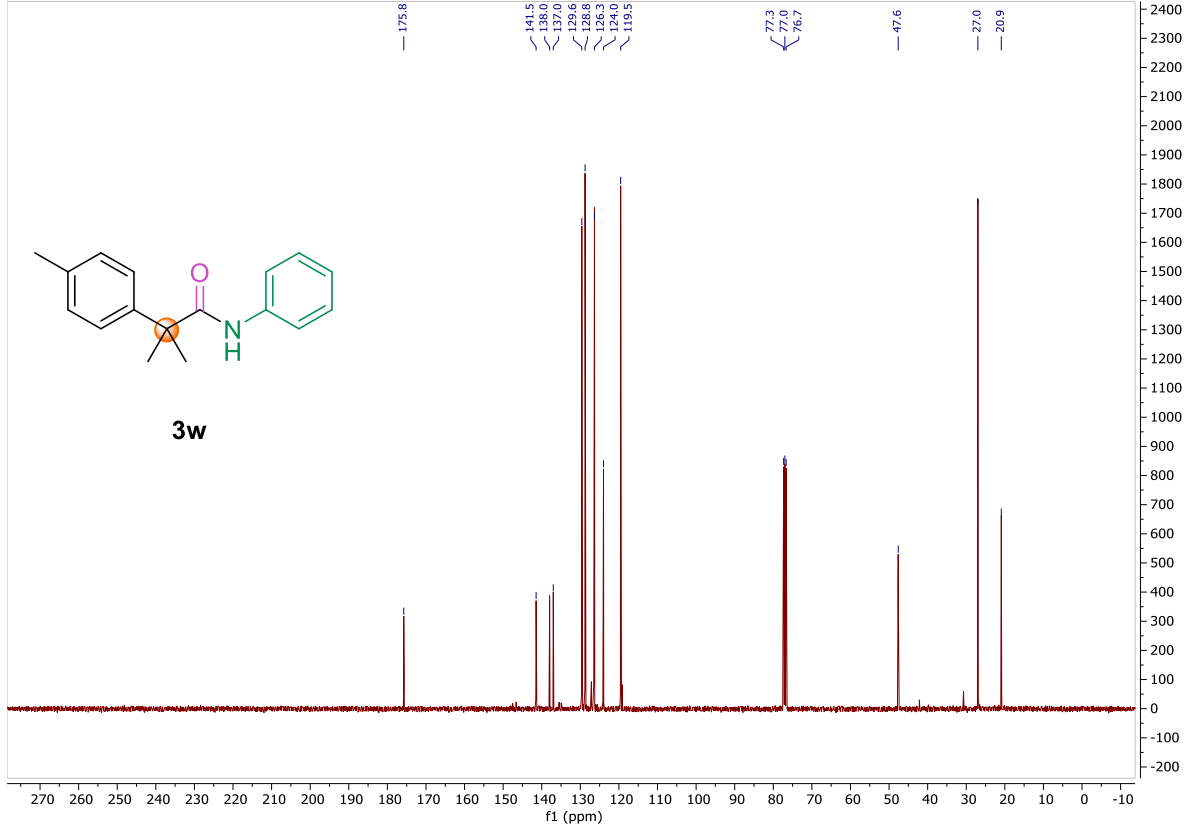



231024.415.10.fid — Xingwei Gu gxw-189-12 — Au1H CDCl3 {C:\Bruker\TopSpin3.6.2} 2310 15 - 300 MHz

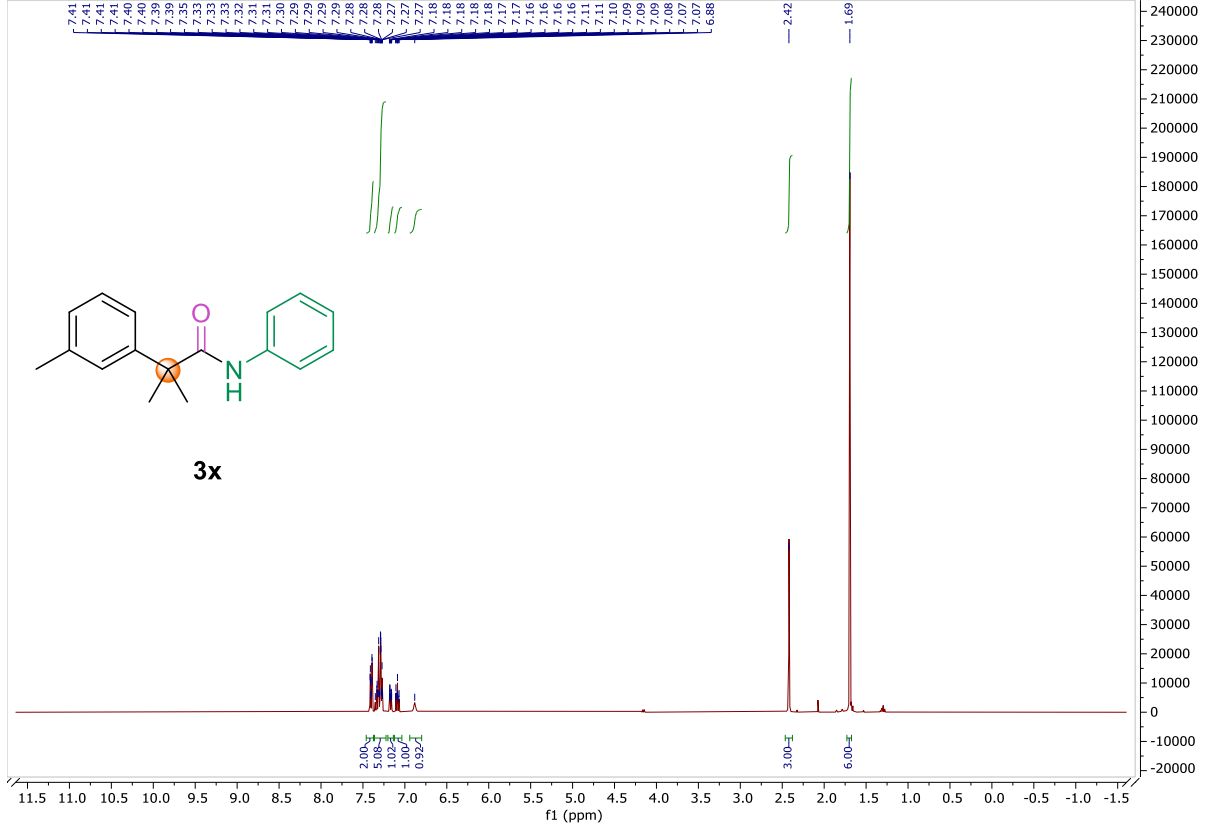

231024.415.11.fid — Xingwei Gu gxw-189-12 — Au13C CDCl3 {C:\Bruker\TopSpin3.6.2} 2310 15 - 75 MHz

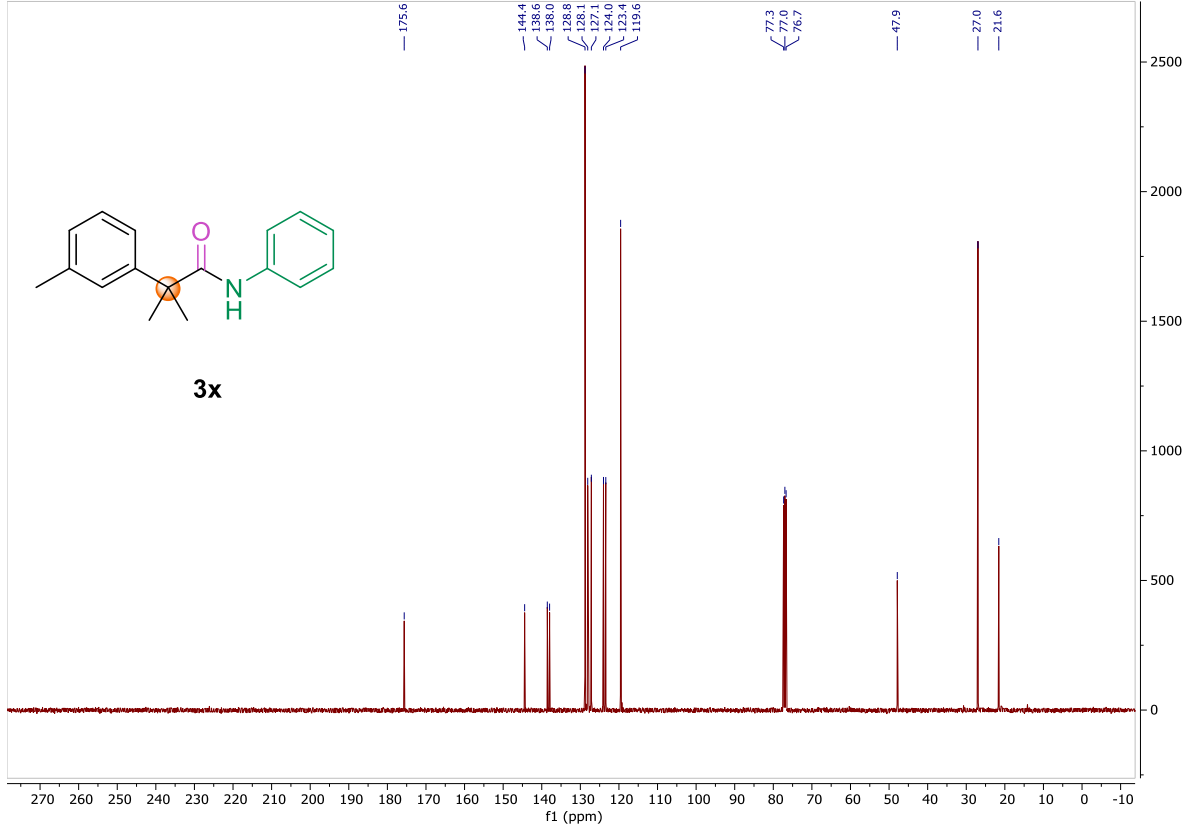



231129.f318.10.fid — Xingwei Gu gxw-197-3 — Au1H CDCl3 {C:\Bruker\TopSpin3.6.2} 2311 18 - 300 MHz

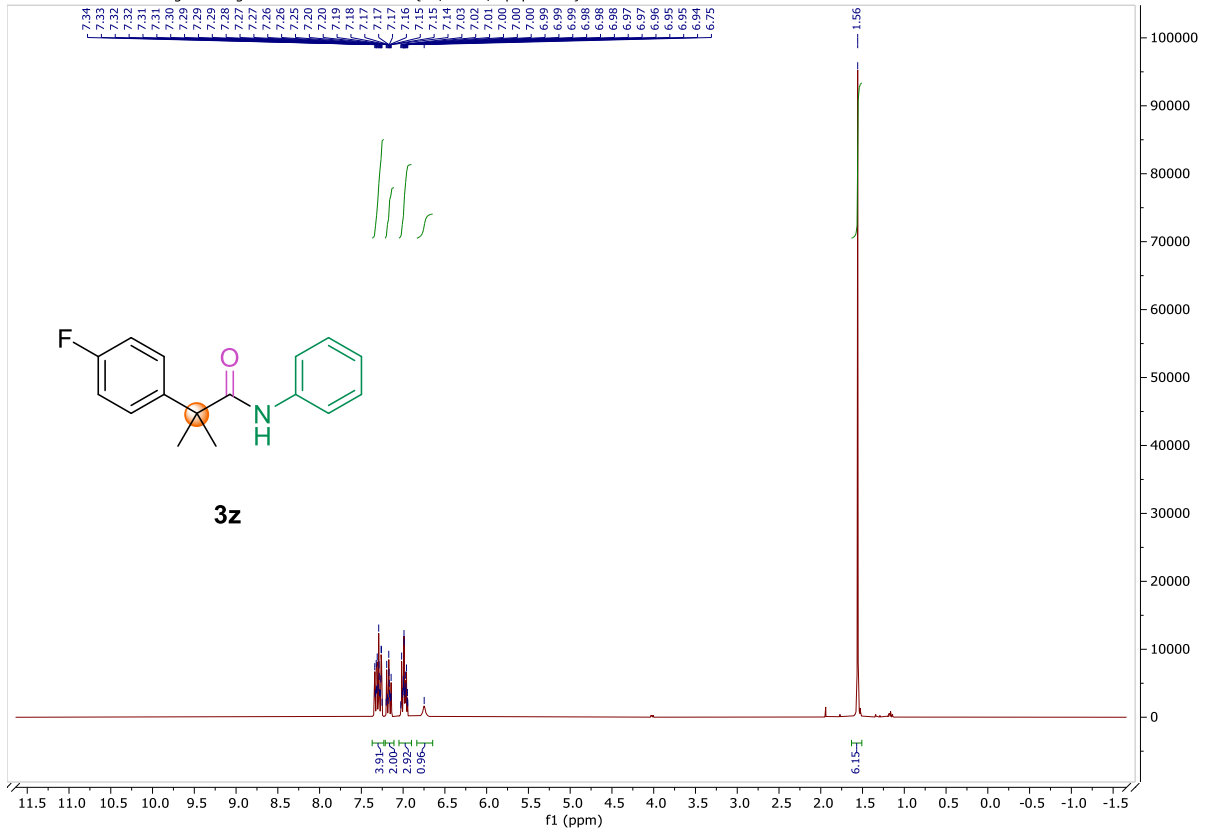

231129.f318.11.fid — Xingwei Gu gxw-197-3 — Au13C CDCl3 {C:\Bruker\TopSpin3.6.2} 2311 18 - 75 MHz

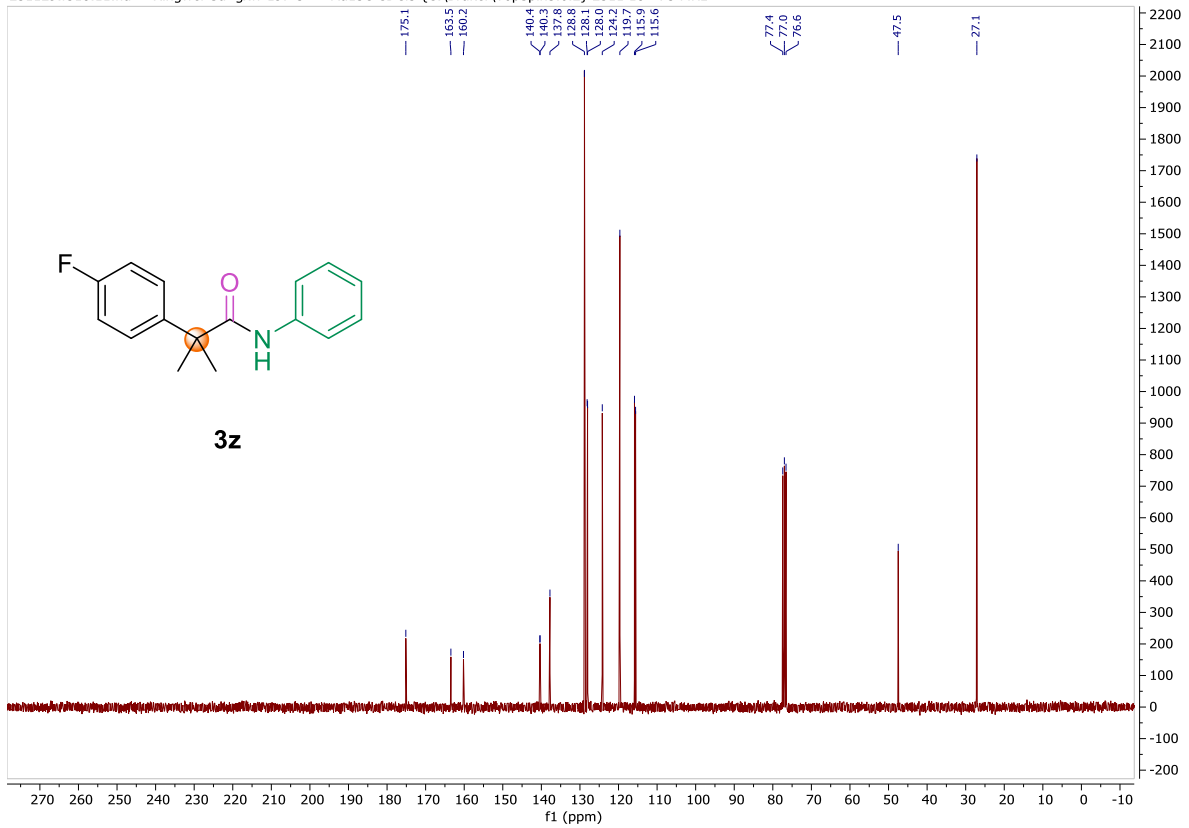

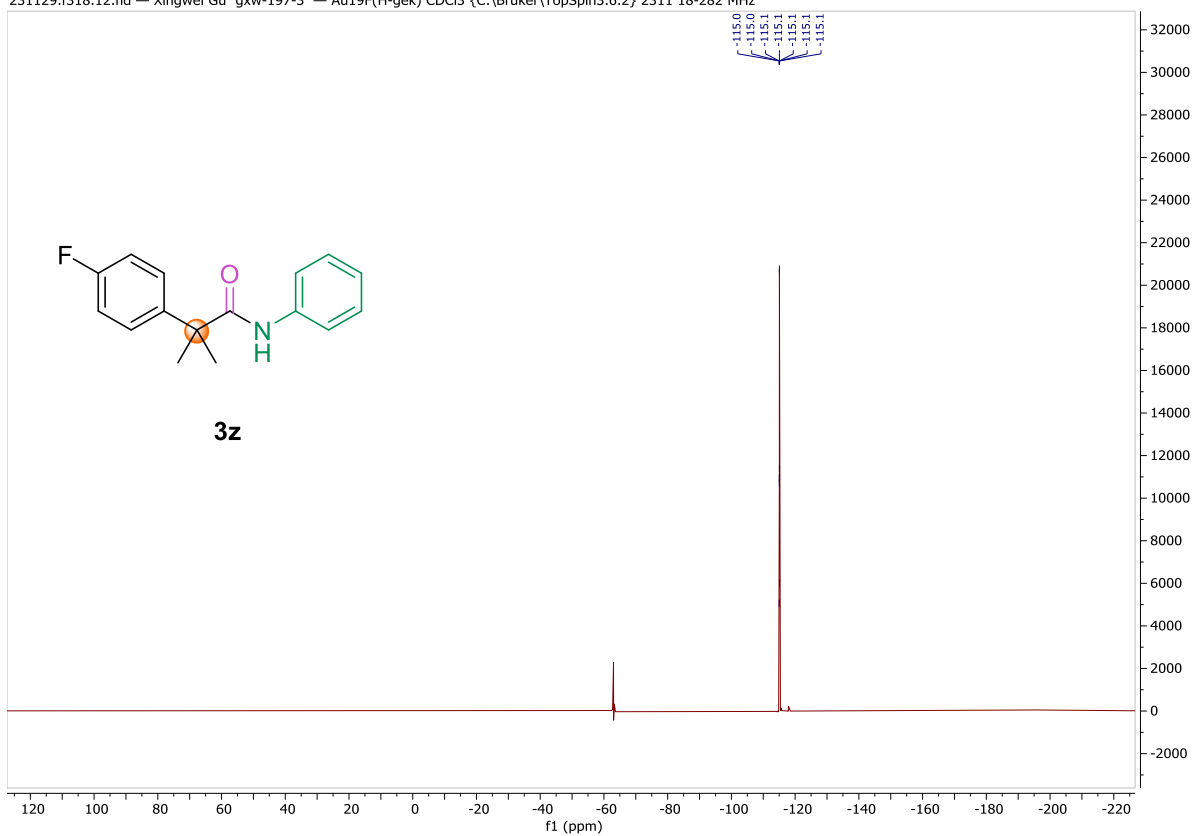

230926.320.10.fid — Xingwei Gu, gxw-189-7 — Au1H CDCl3 {C:\Bruker\TopSpin3.6.2} 2309 20 - 300 MHz

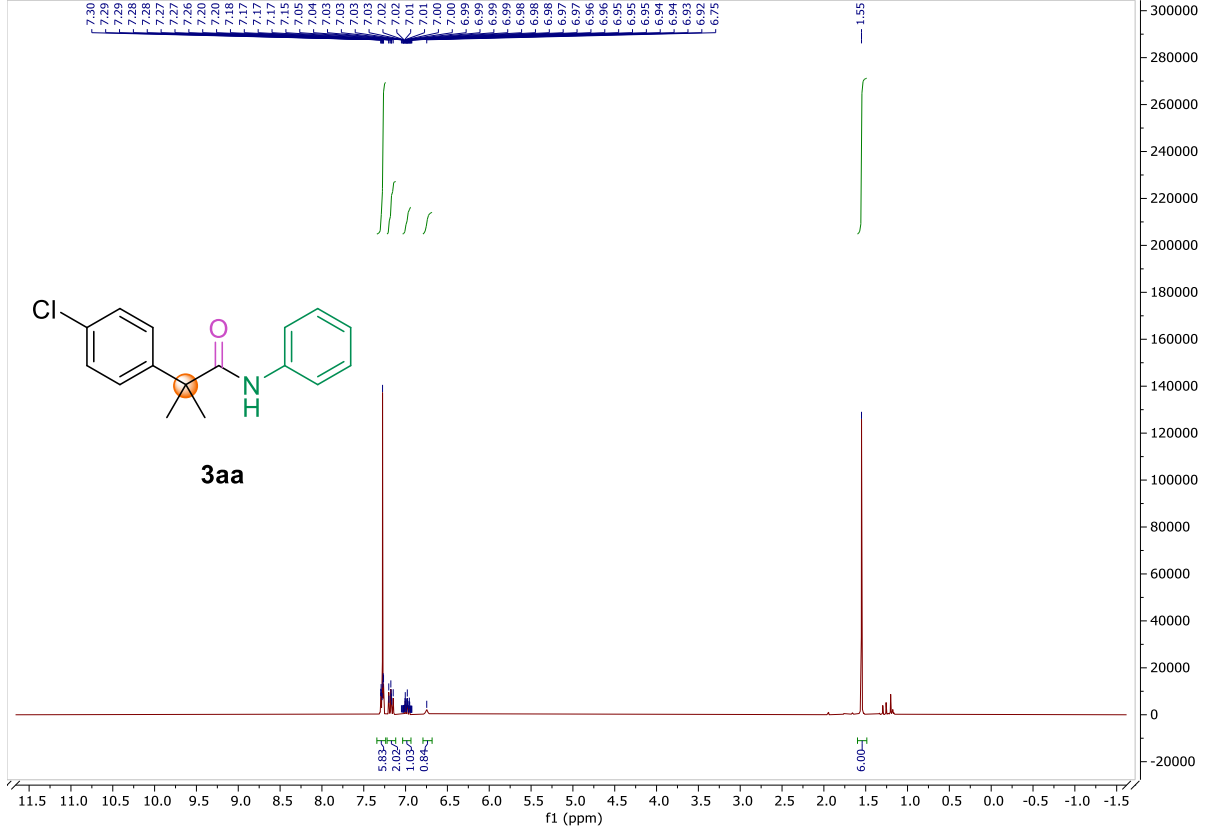

230926.320.11.fid — Xingwei Gu, gxw-189-7 — Au13C CDCl3 {C:\Bruker\TopSpin3.6.2} 2309 20 - 75 MHz

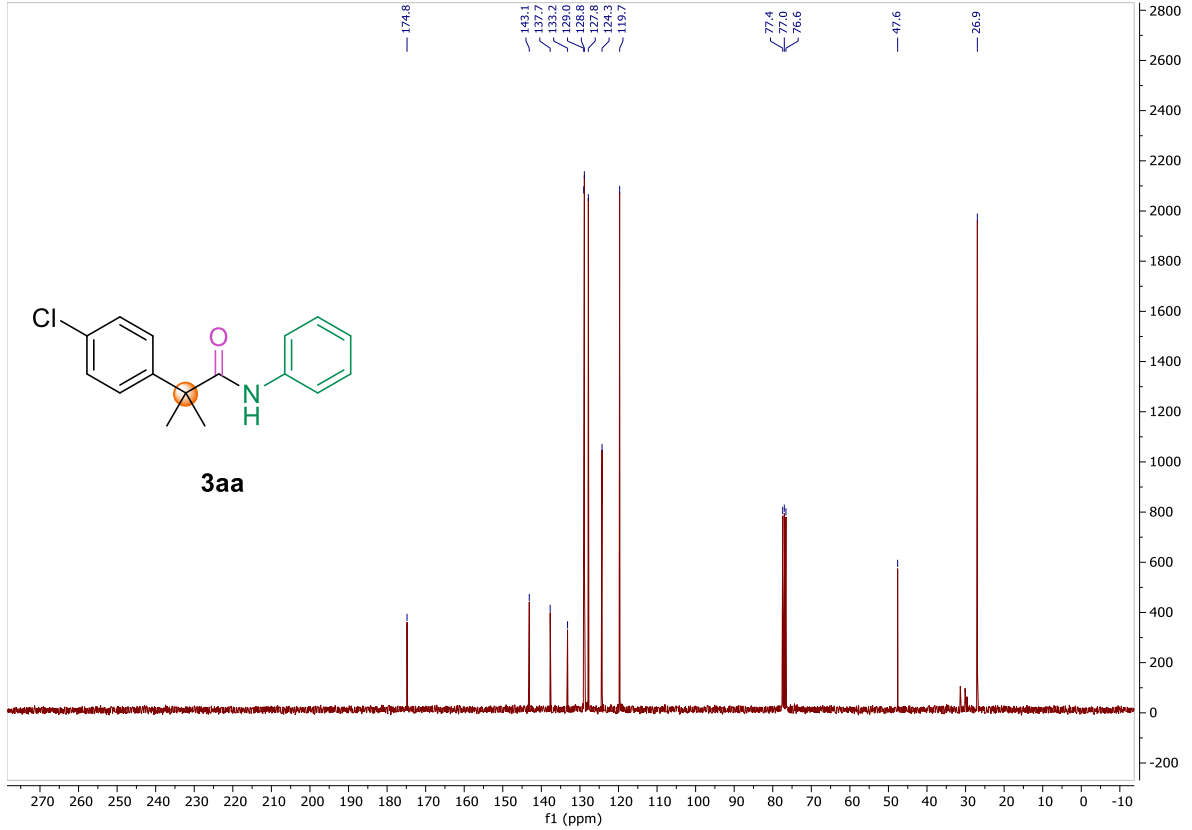

230928.f304.10.fid — Xingwei Gu gxw-189-8 — PROTON CDCl3 {C:\Bruker\TopSpin3.6.2} 2309 4 - 300 MHz

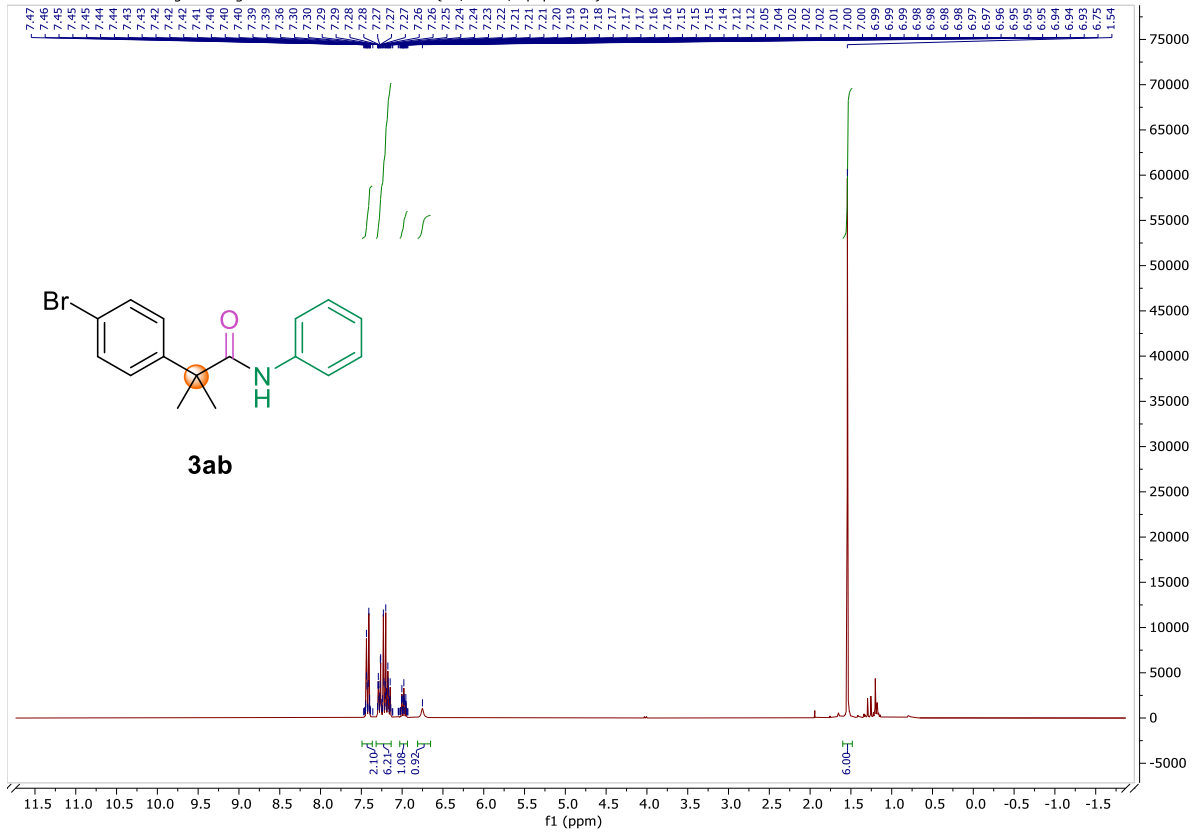



231129.f317.10.fid — Xingwei Gu gxw-197-2 — Au1H CDCl3 {C:\Bruker\TopSpin3.6.2} 2311 17 - 300 MHz

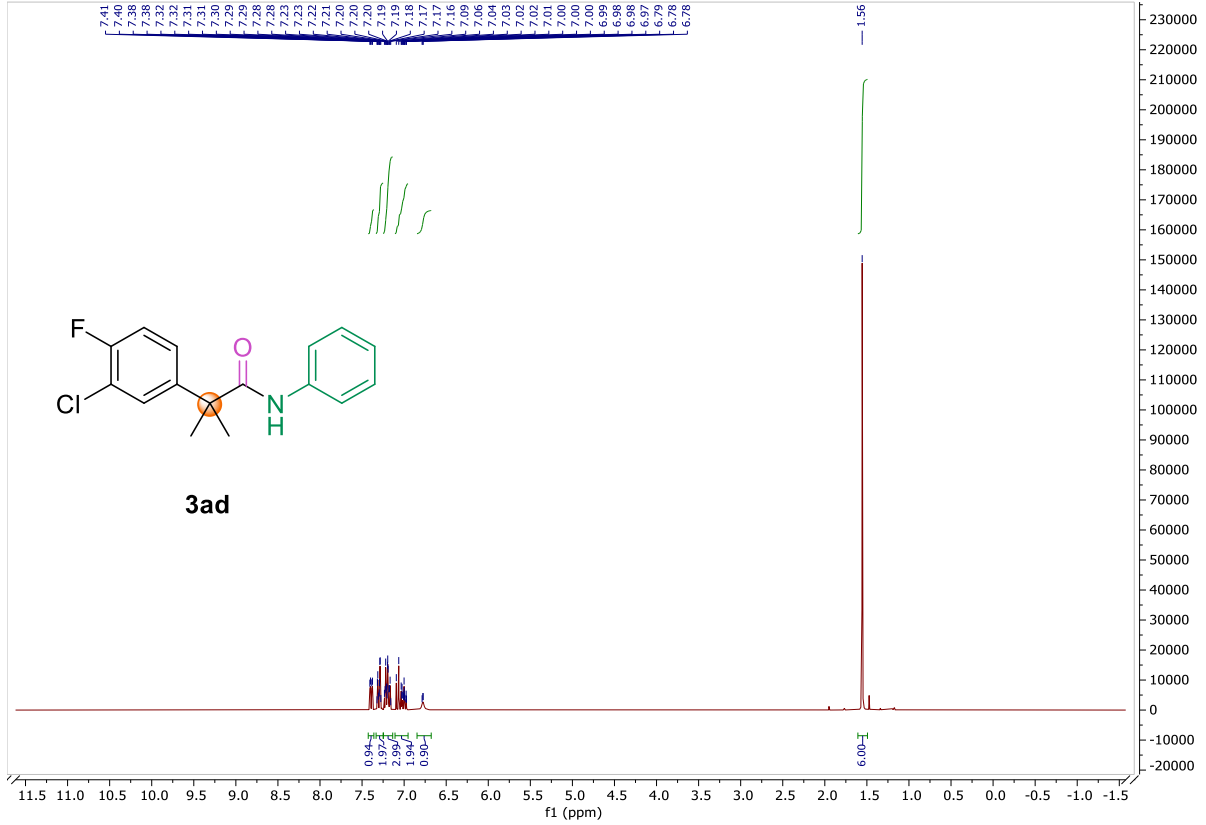

231129.f317.11.fid — Xingwei Gu gxw-197-2 — Au13C CDCl3 {C:\Bruker\TopSpin3.6.2} 2311 17 - 75 MHz

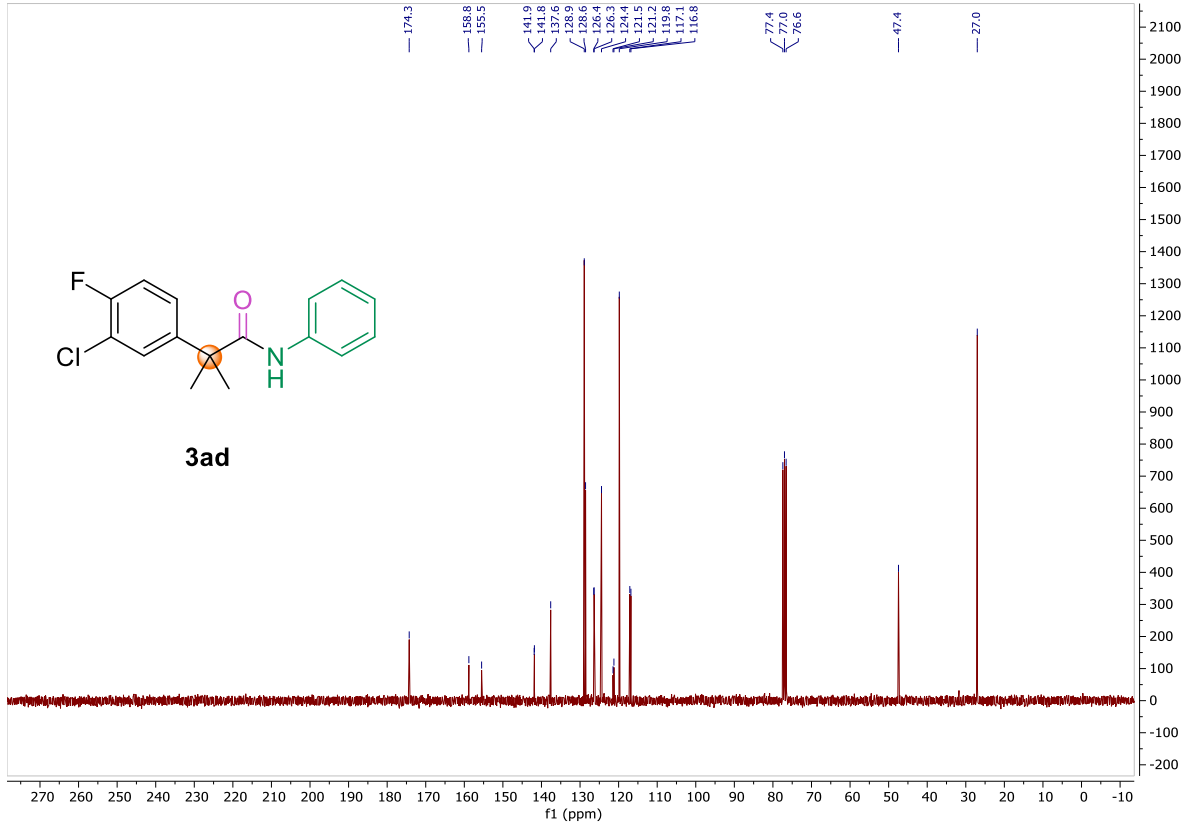



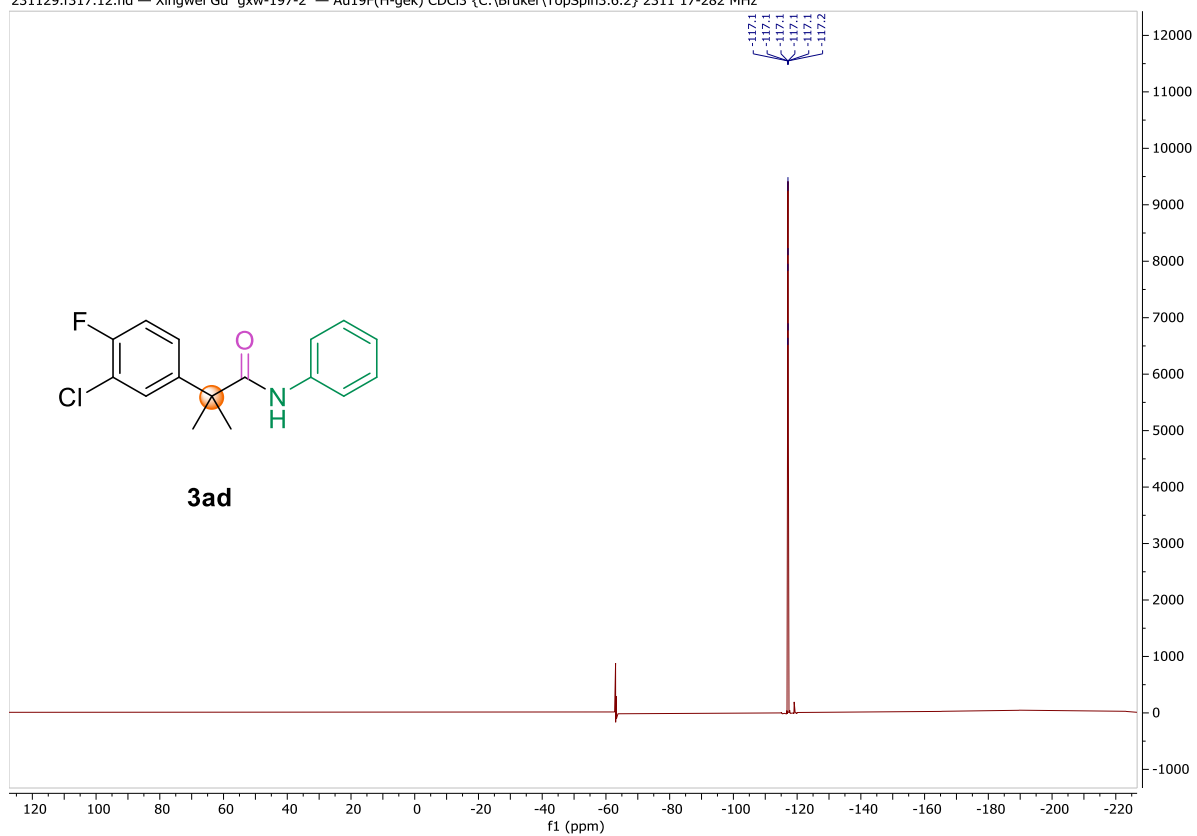

230928.f302.10.fid — Xingwei Gu gxw-189-6-1 — PROTON CDCl3 {C:\Bruker\TopSpin3.6.2} 2309 2 - 300 MHz

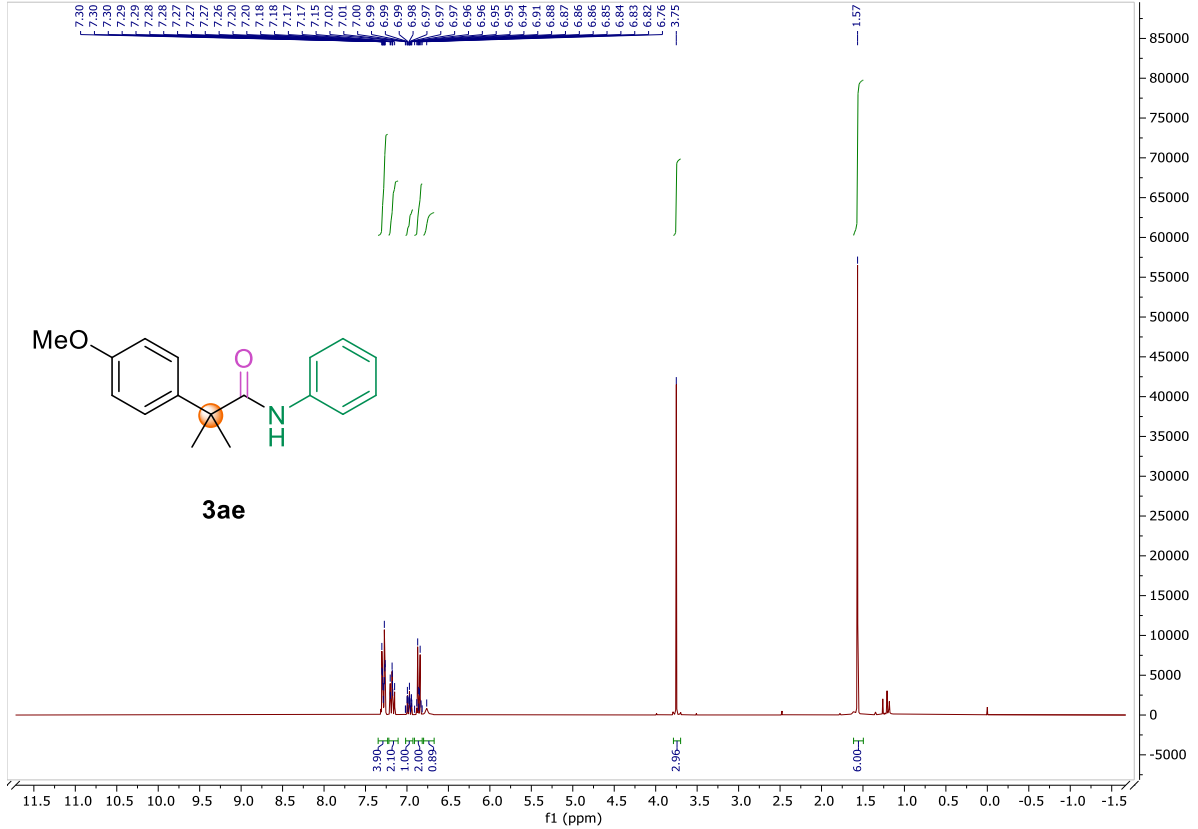

230928.f302.11.fid — Xingwei Gu gxw-189-6-1 — Au13C CDCl3 {C:\Bruker\TopSpin3.6.2} 2309 2 - 75 MHz

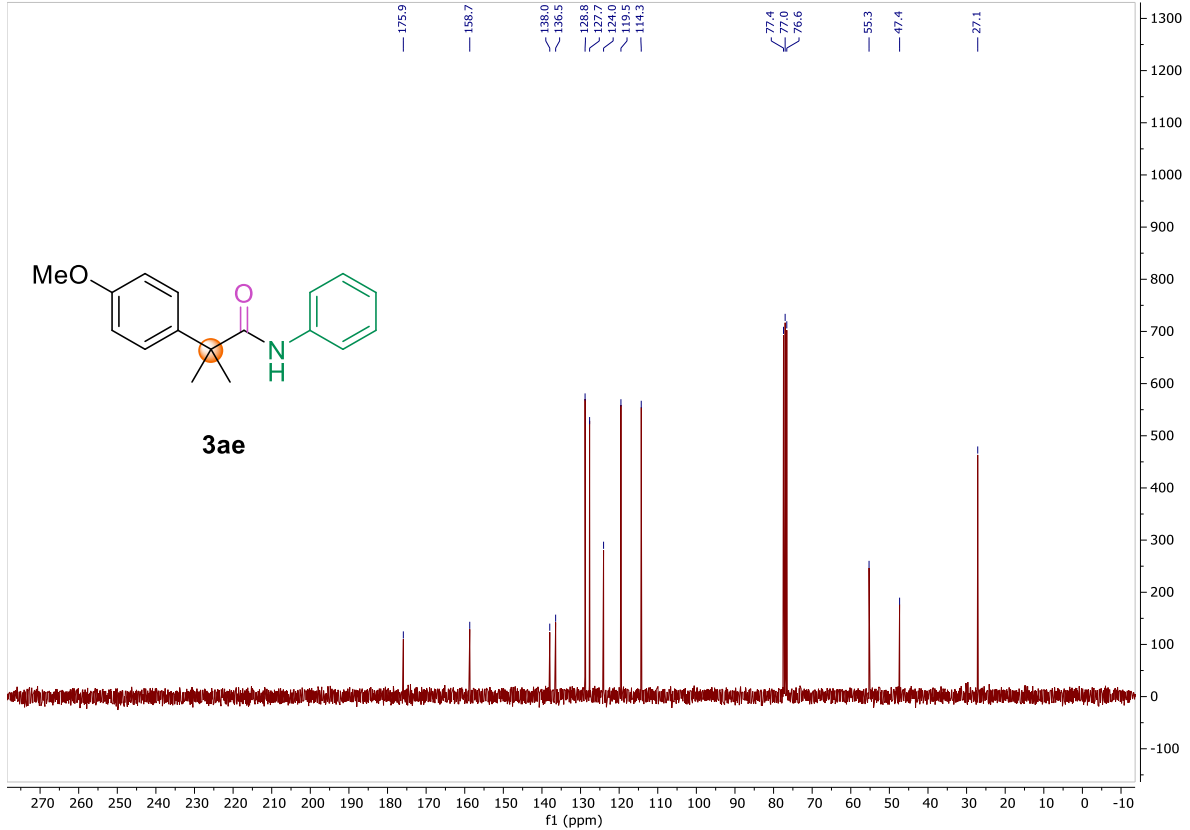

231204.311.10.fid — Xingwei Gu gxw-197-14 — Au1H CDCl3 {C:\Bruker\TopSpin3.6.2} 2312 11 - 300 MHz

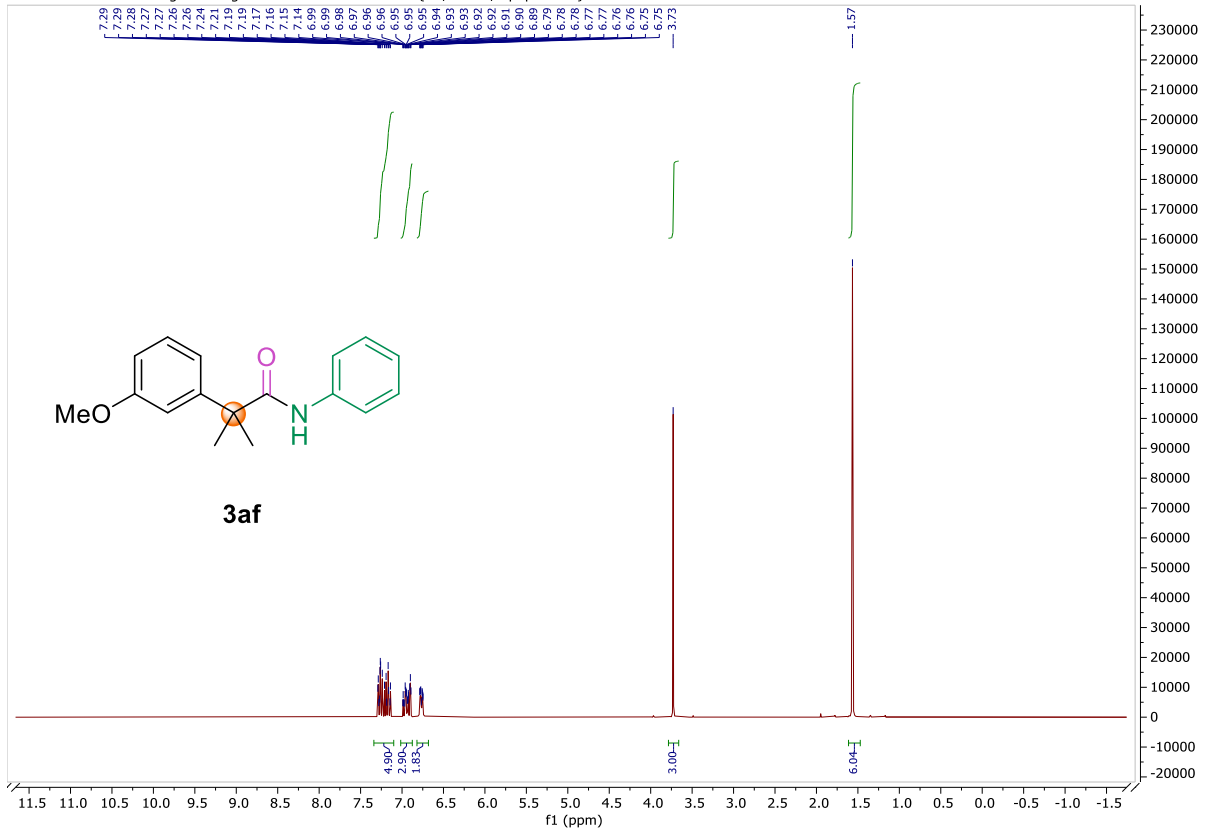

231204.311.11.fid — Xingwei Gu gxw-197-14 — Au13C CDCl3 {C:\Bruker\TopSpin3.6.2} 2312 11 - 75 MHz

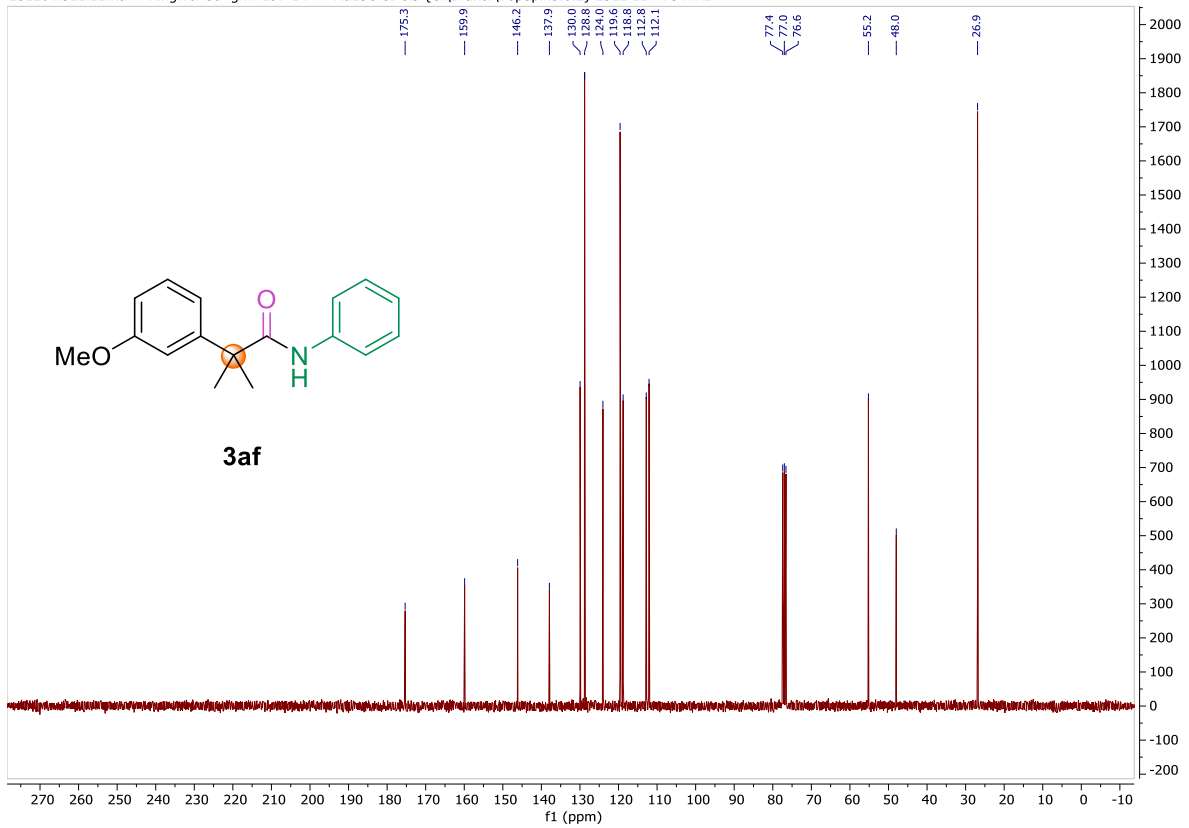

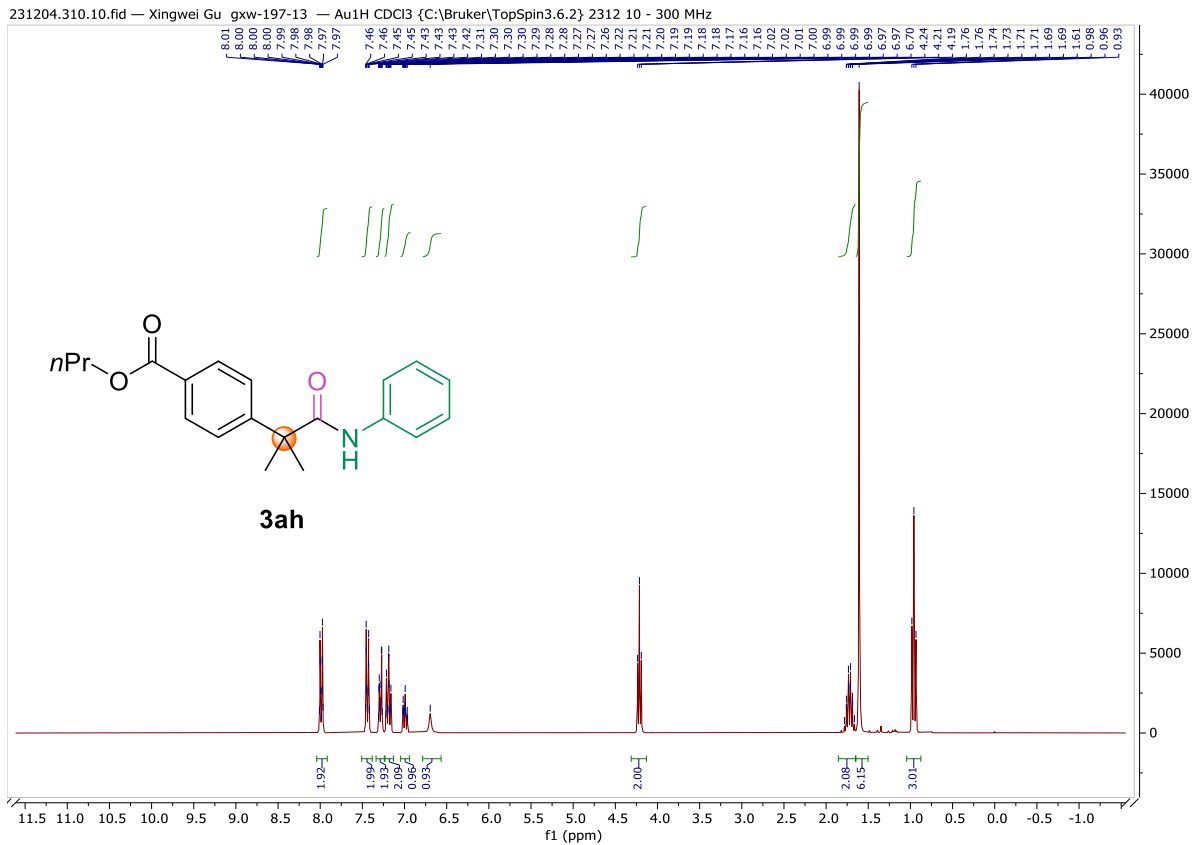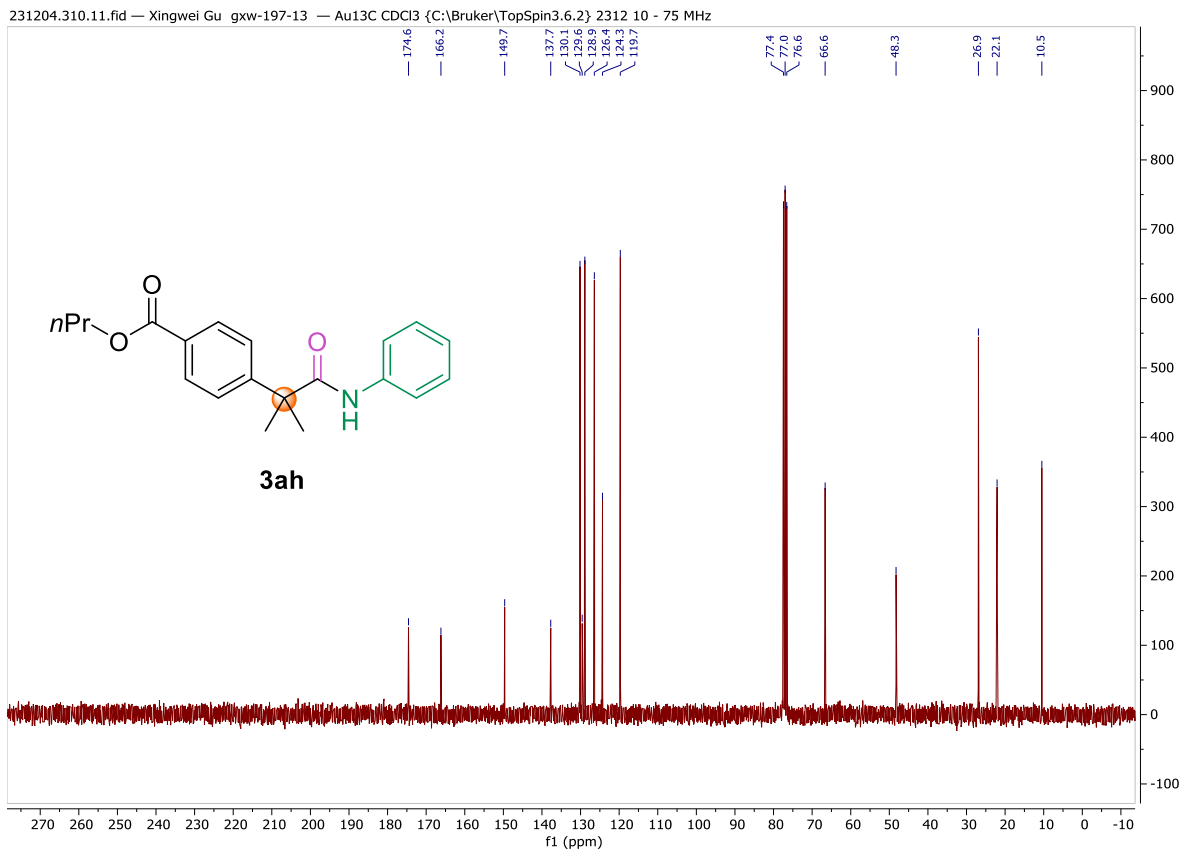



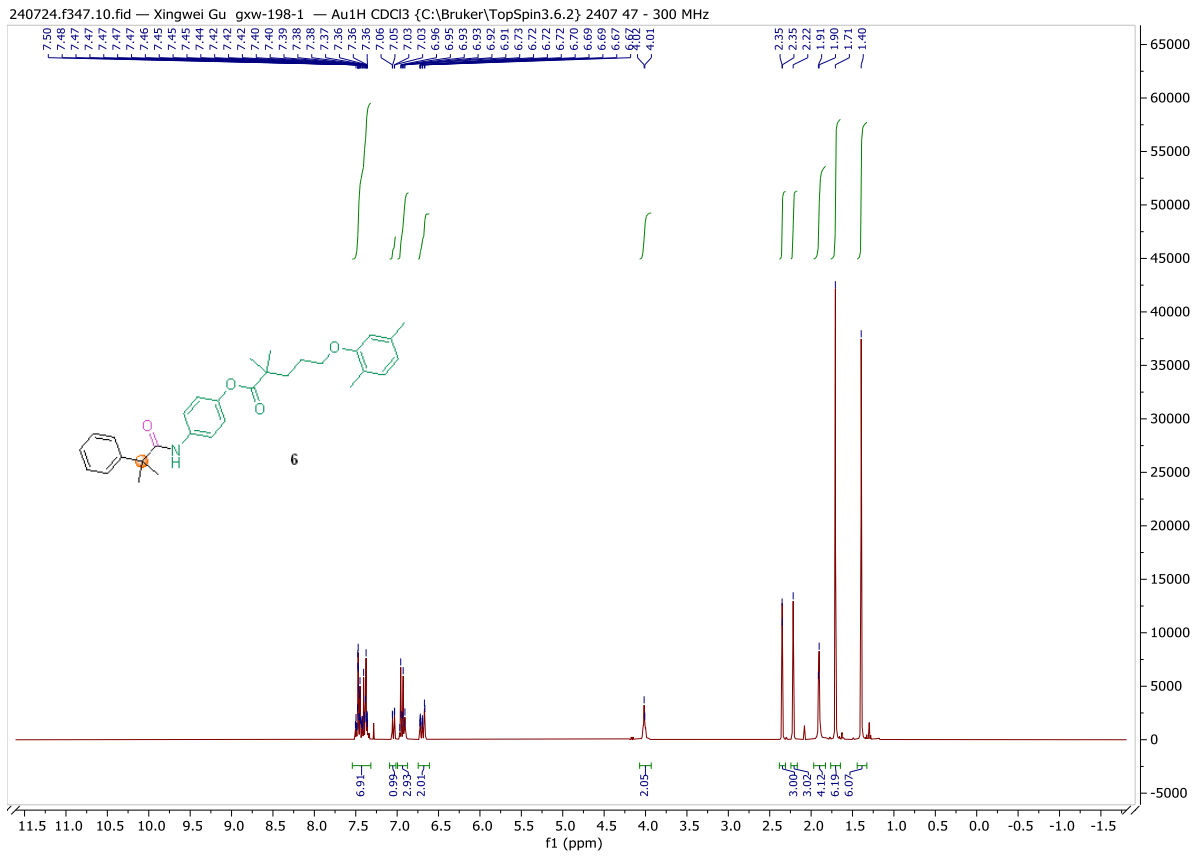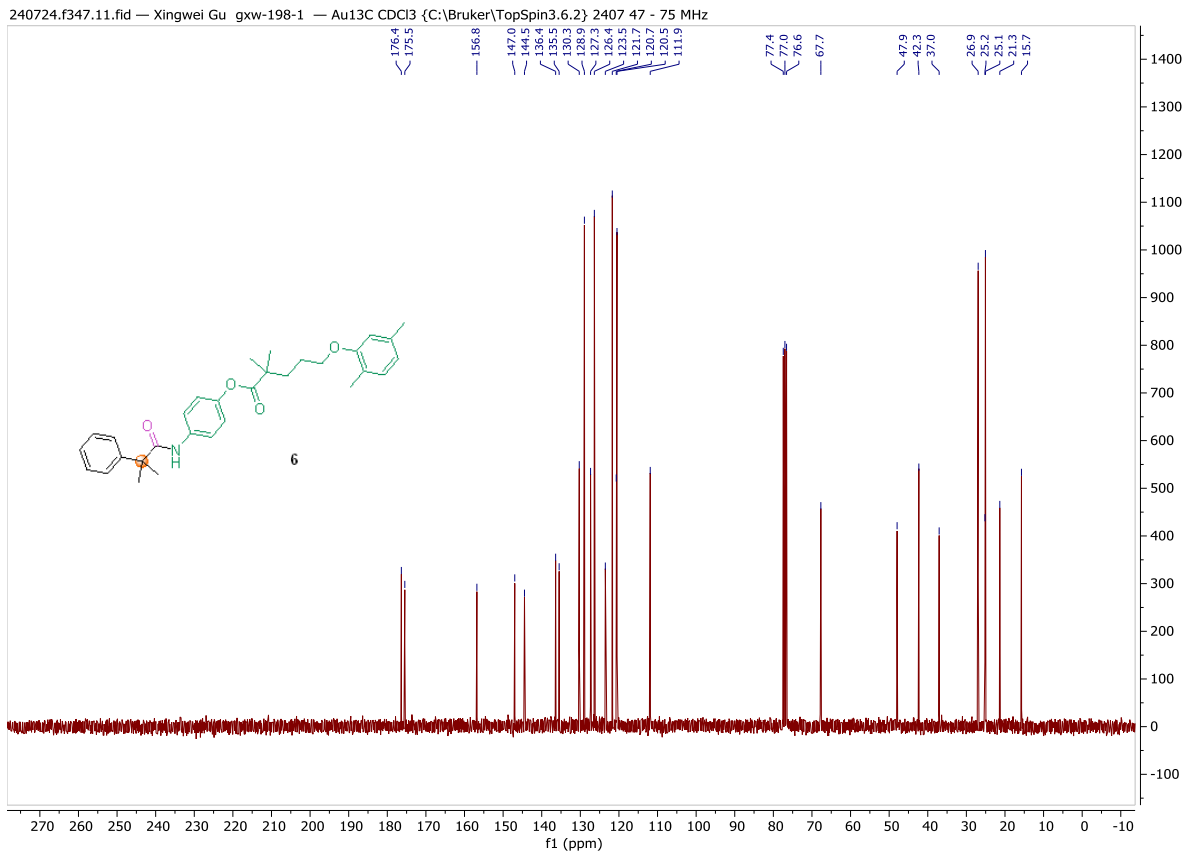

231122.f302.10.fid — Xingwei Gu gxw-195-16 — Au1H CDCl3 {C:\Bruker\TopSpin3.6.2} 2311 2 - 300 MHz

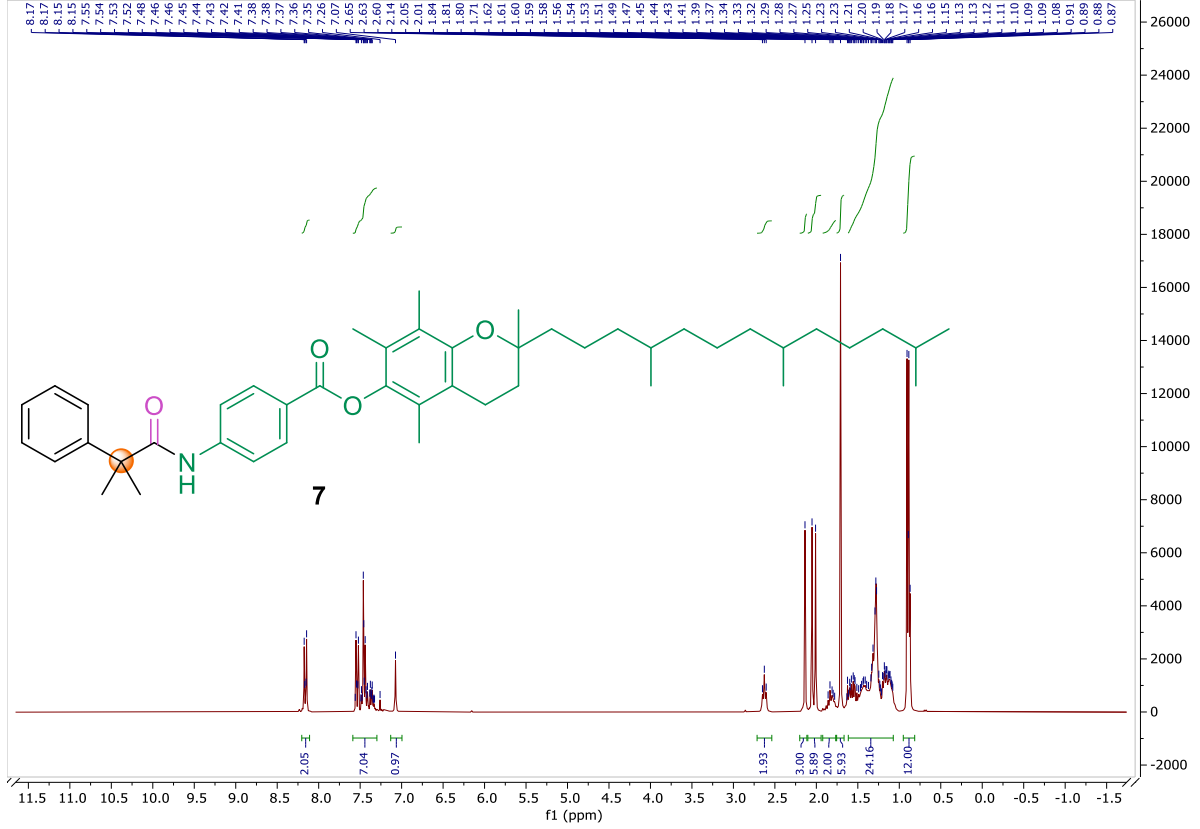

231122.f302.11.fid — Xingwei Gu gxw-195-16 — Au13C CDCl3 {C:\Bruker\TopSpin3.6.2} 2311 2 - 75 MHz

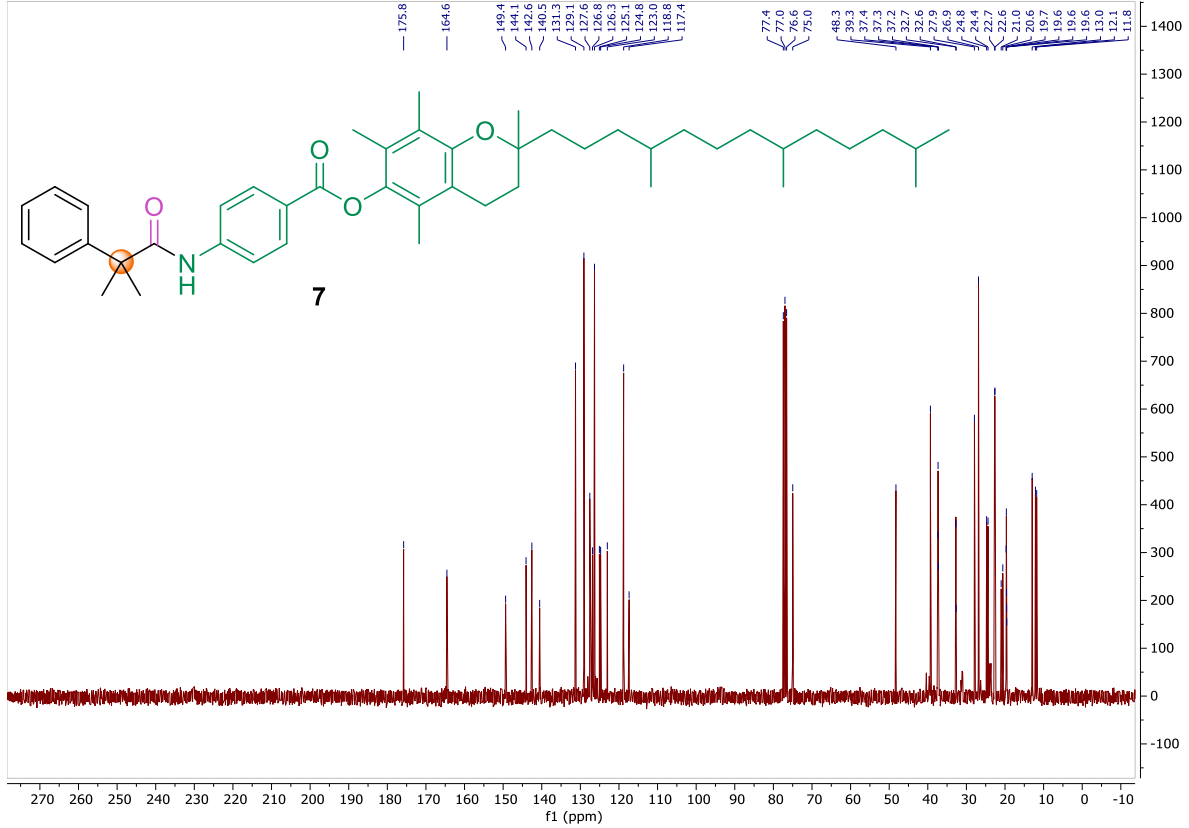

230907.301.10.fid — Xingwei Gu gxw-184-1 — Au1H CDCl3 {C:\Bruker\TopSpin3.6.2} 2309 1 - 300 MHz

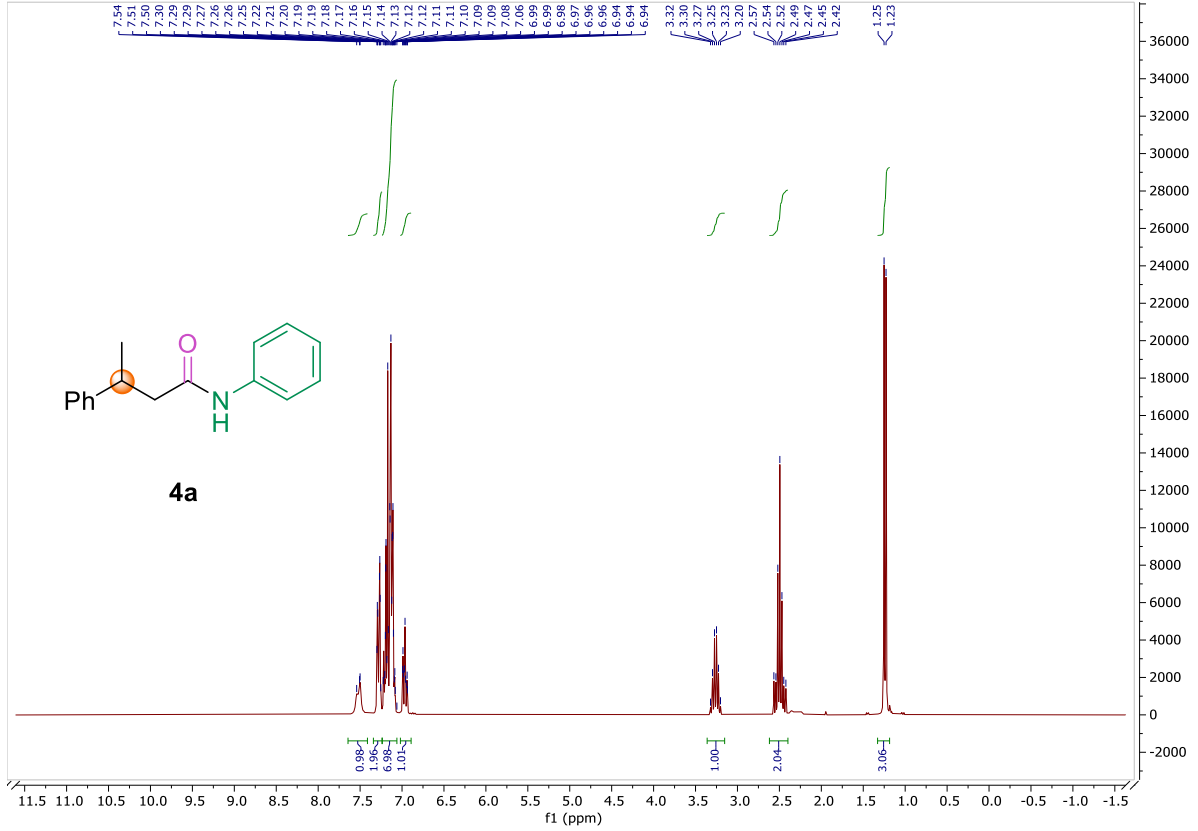

230907.301.11.fid — Xingwei Gu gxw-184-1 — Au13C CDCl3 {C:\Bruker\TopSpin3.6.2} 2309 1 - 75 MHz

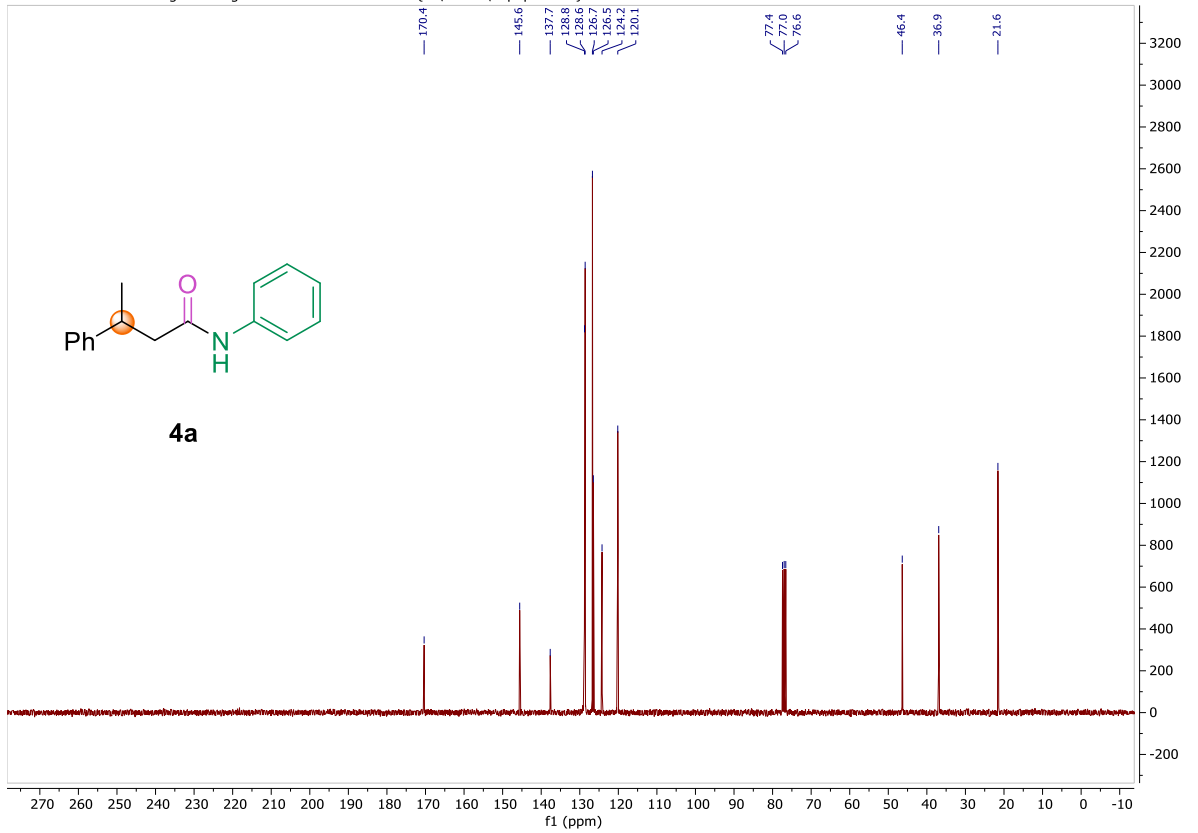



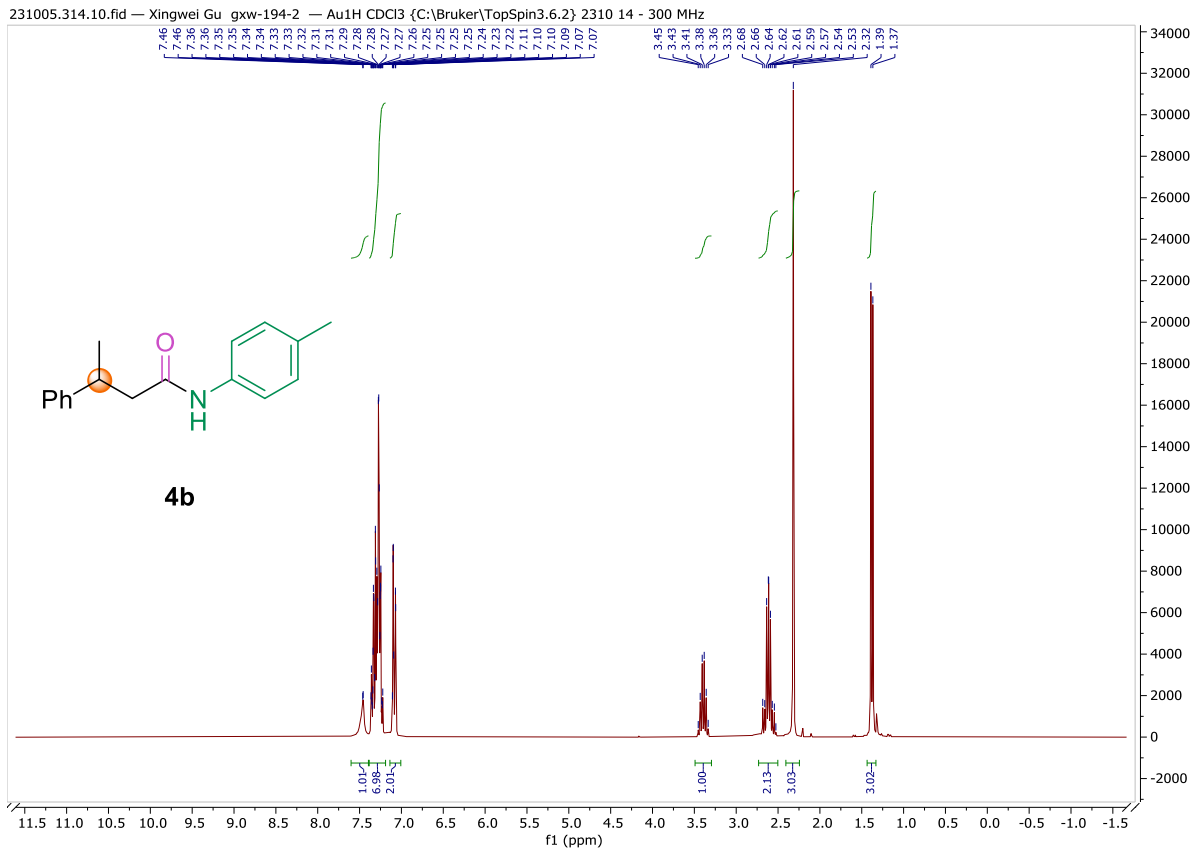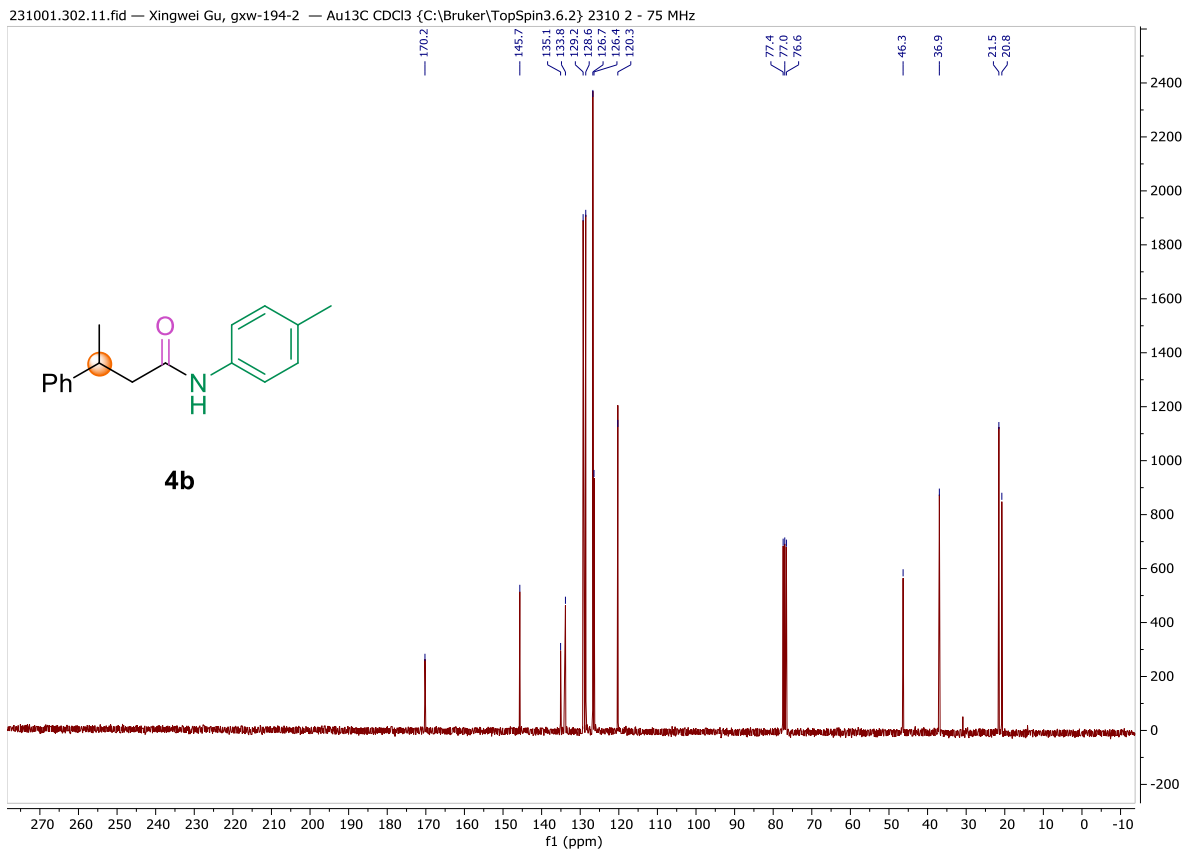

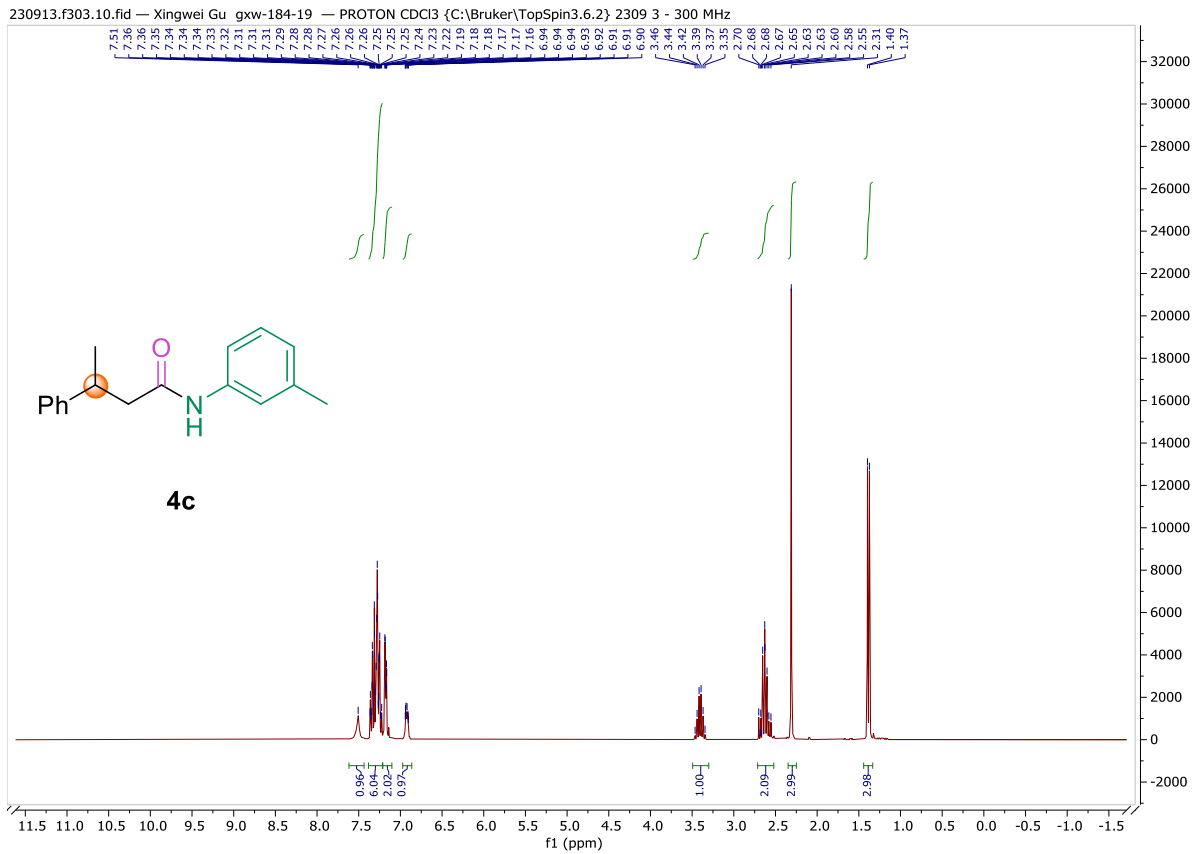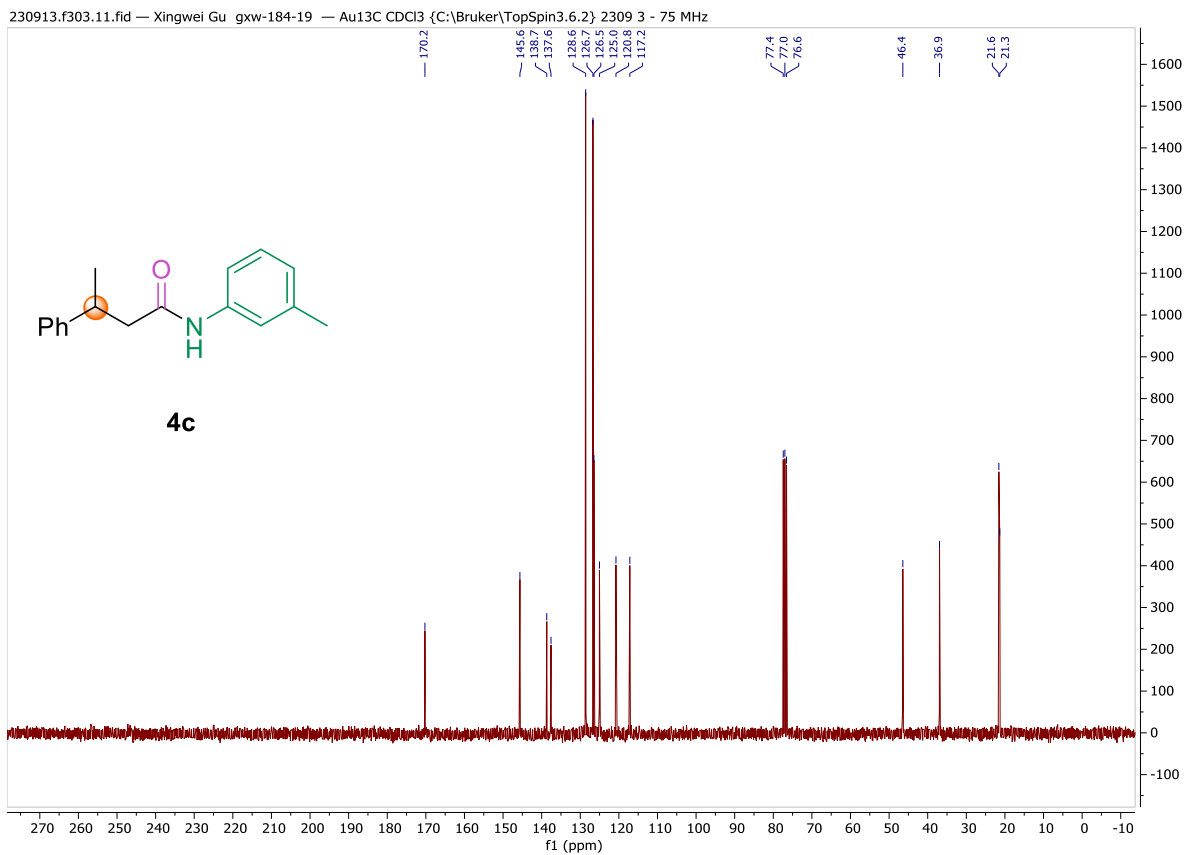

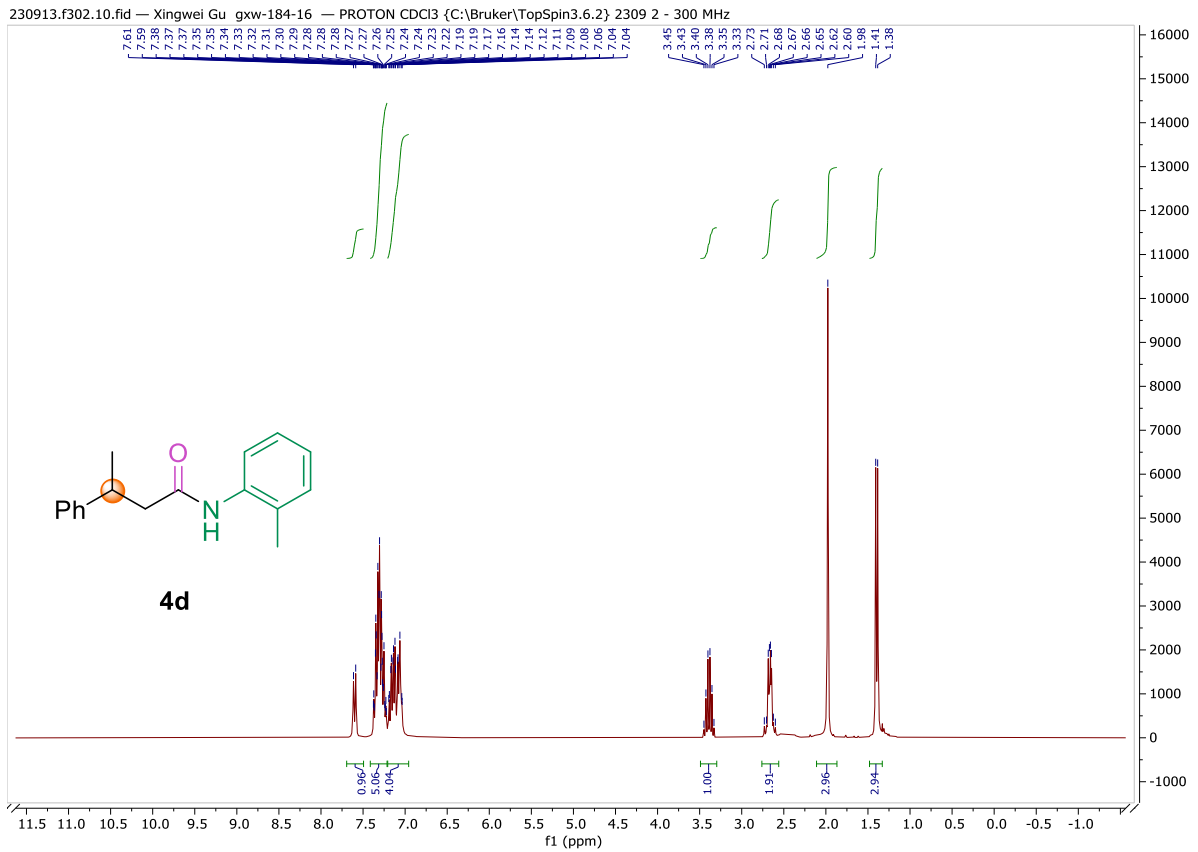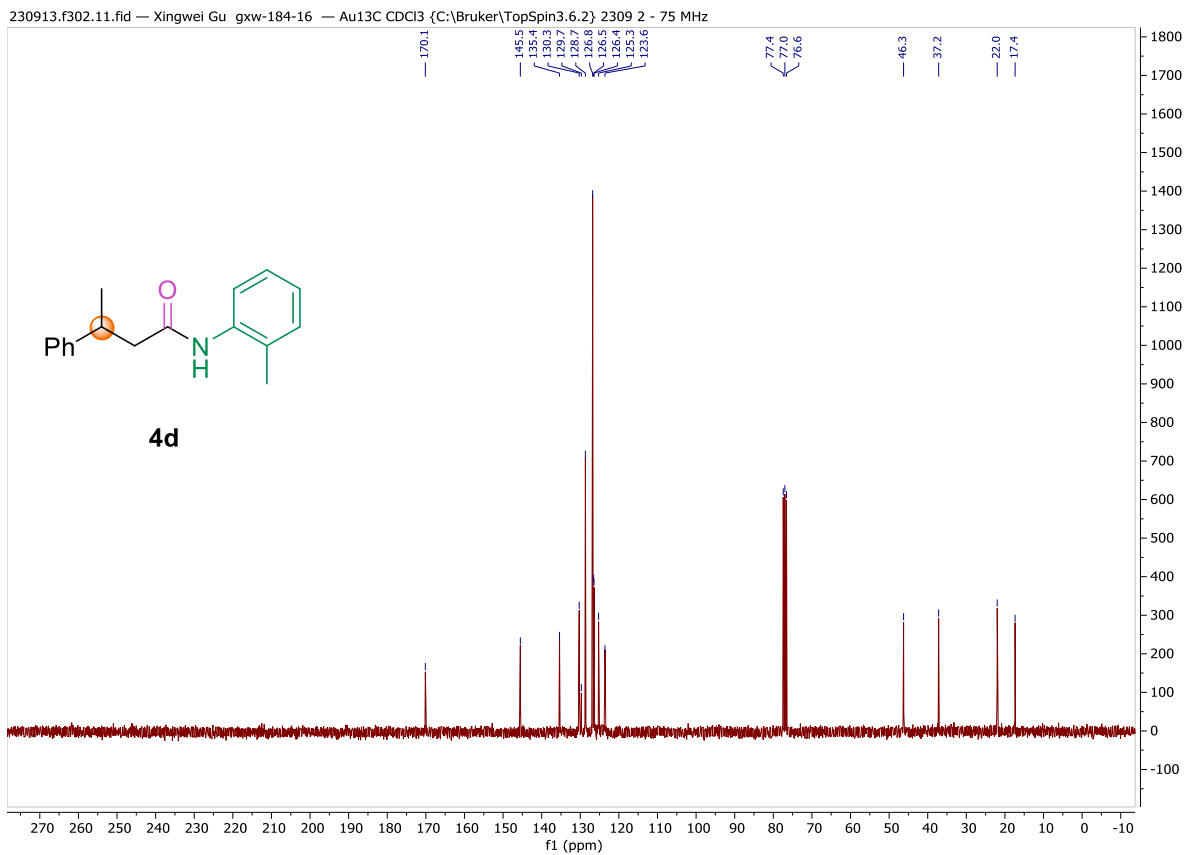

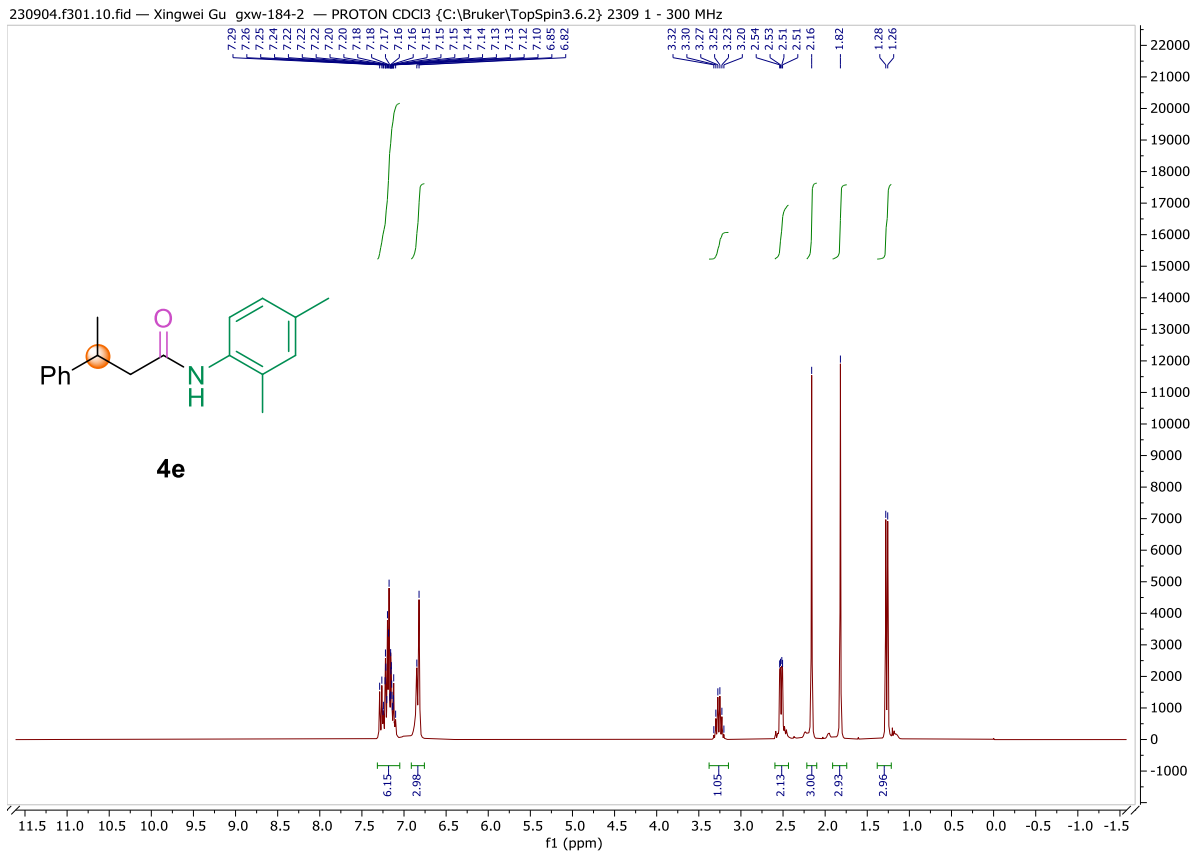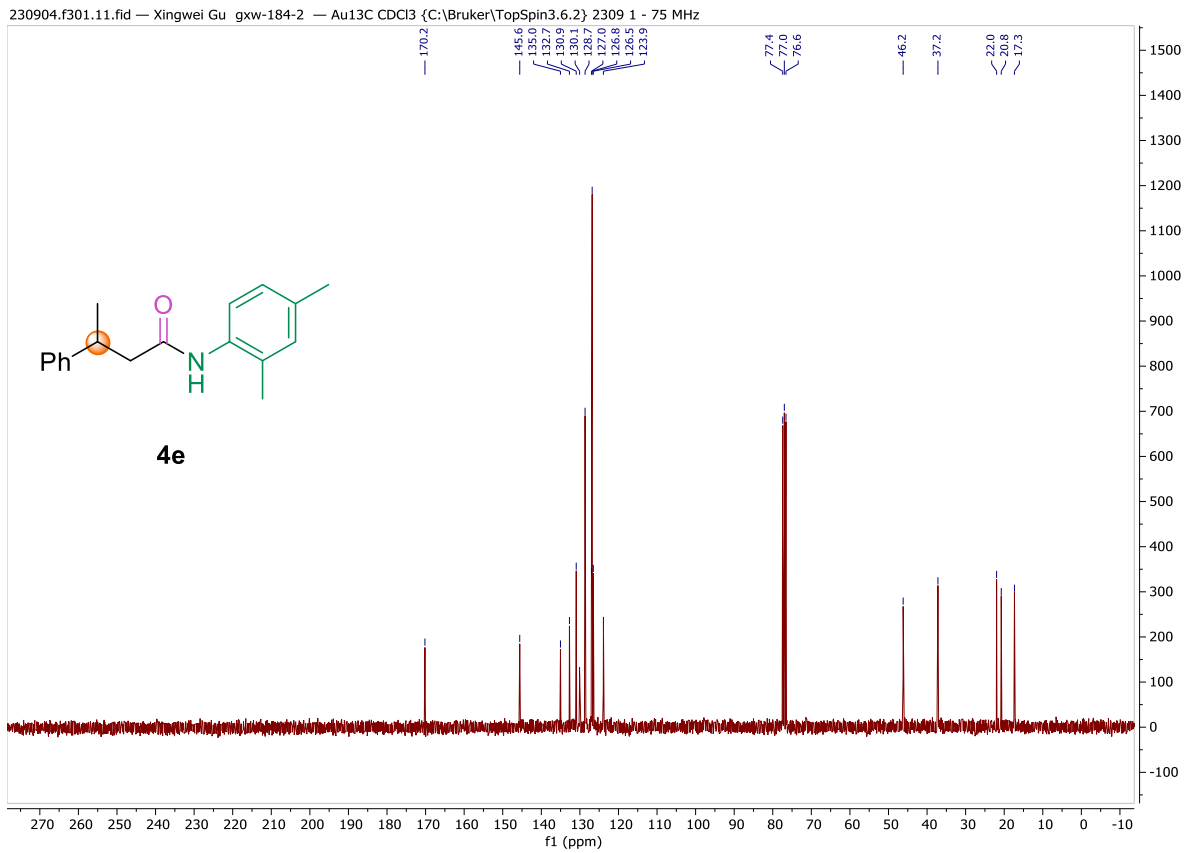

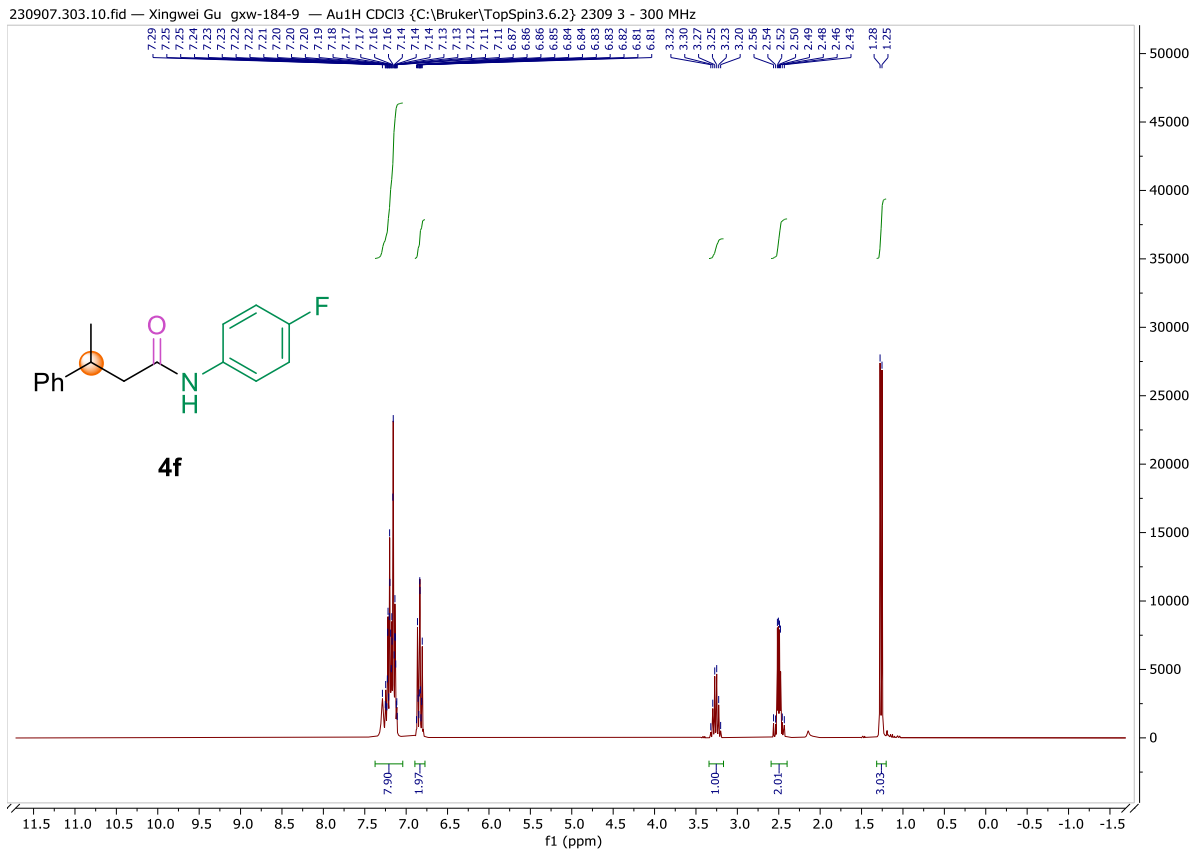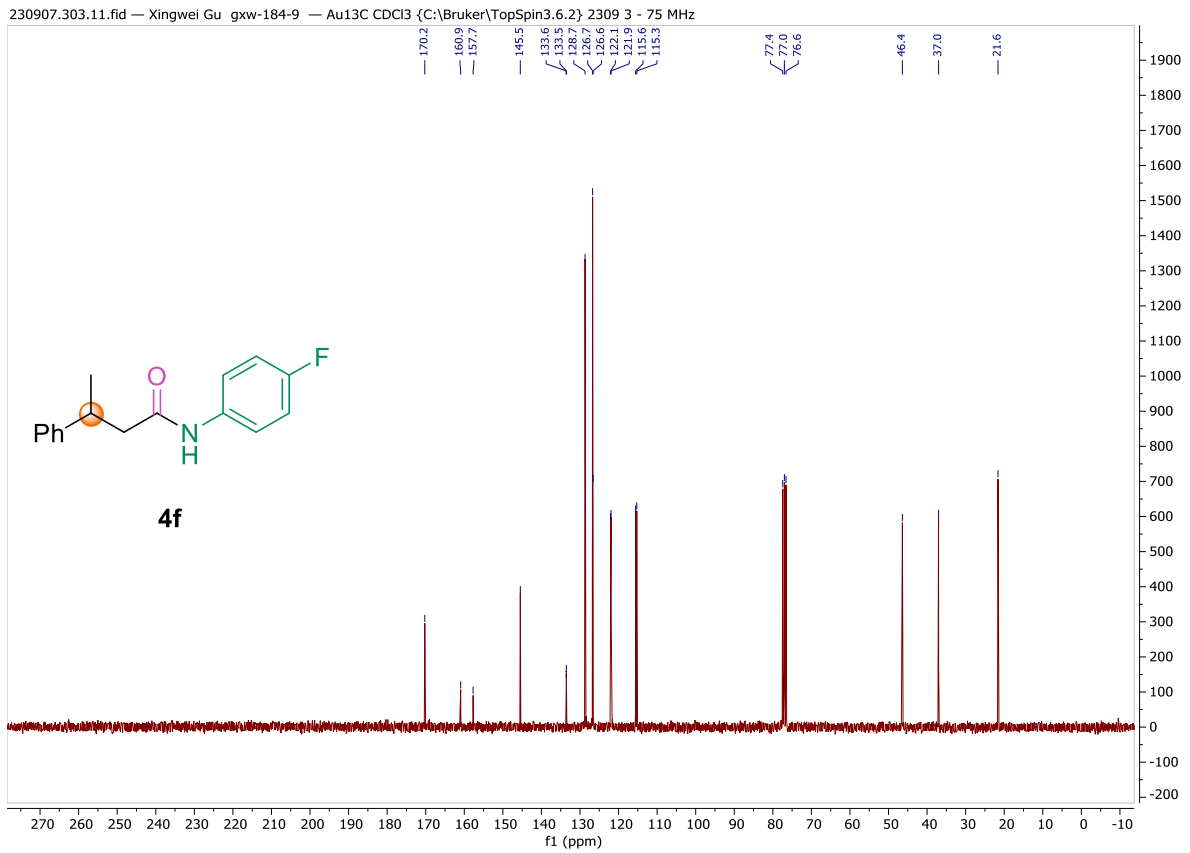

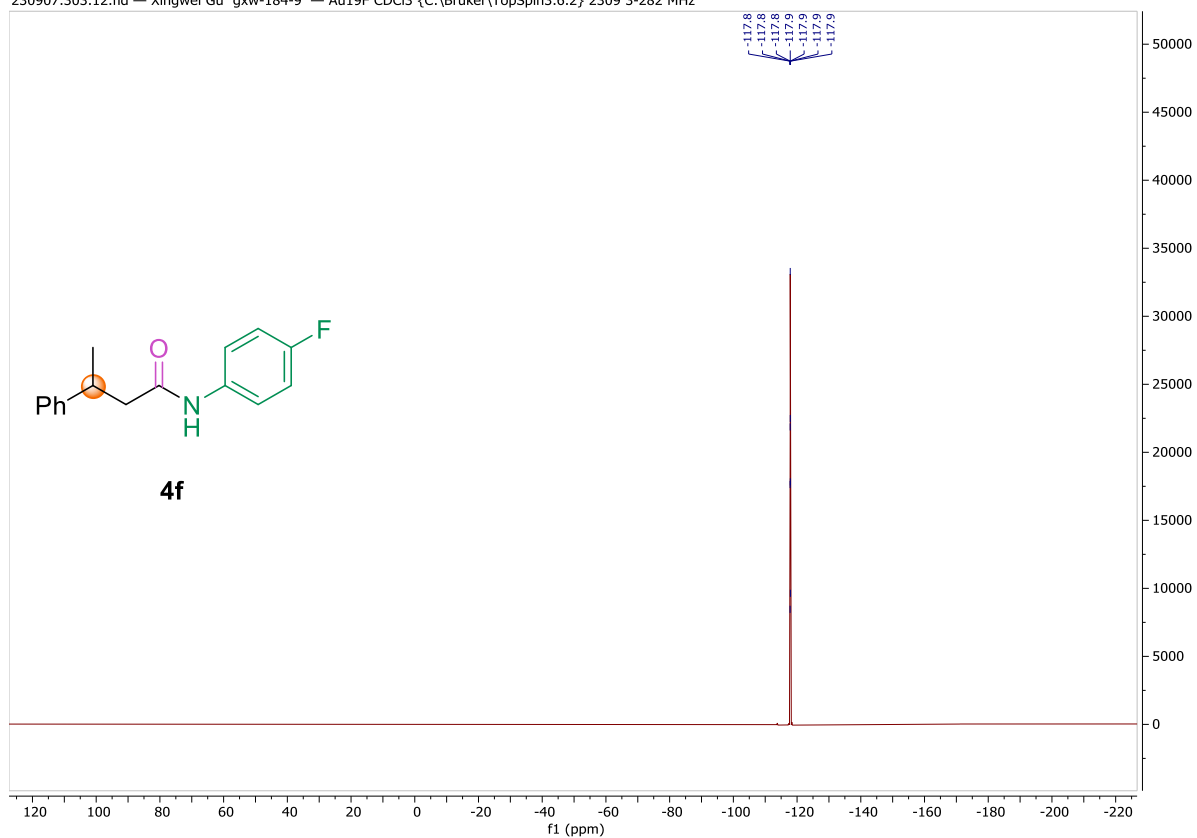

230907.302.10.fid — Xingwei Gu gxw-184-14 — Au1H CDCl3 {C:\Bruker\TopSpin3.6.2} 2309 2 - 300 MHz

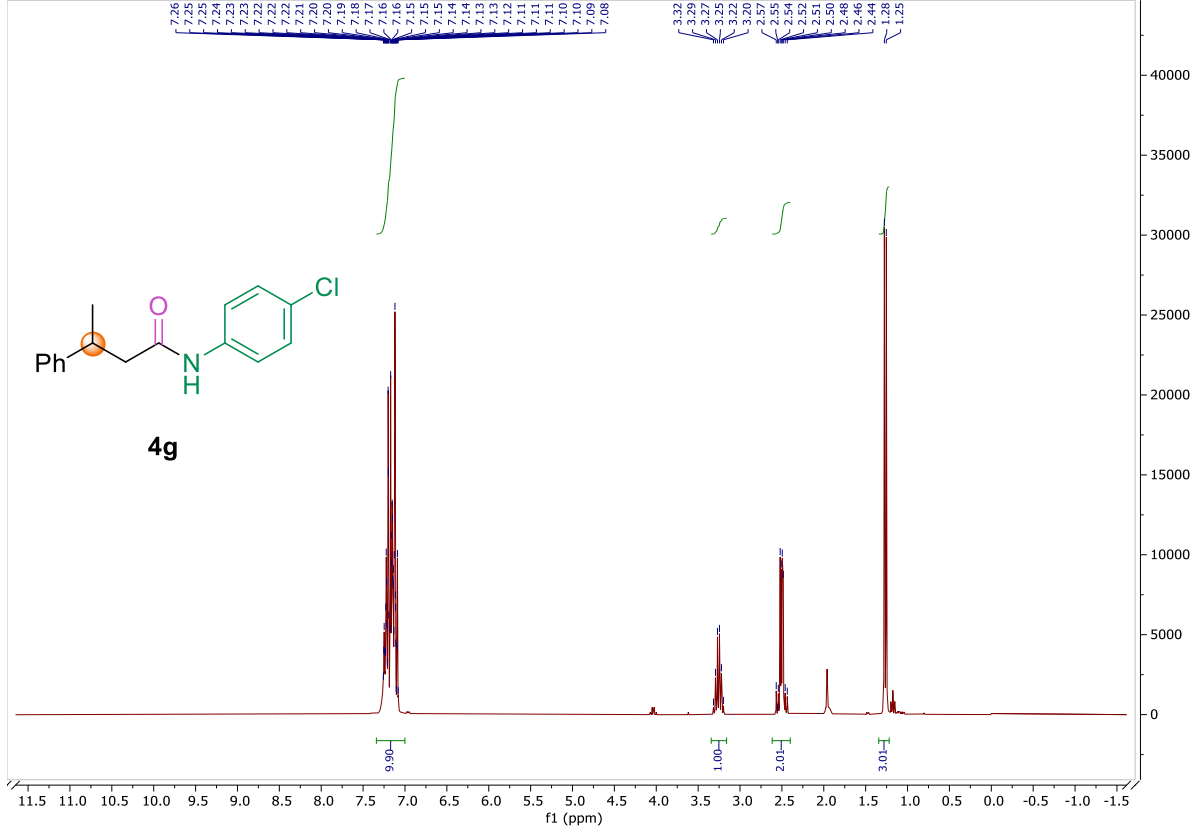

230907.302.11.fid — Xingwei Gu gxw-184-14 — Au13C CDCl3 {C:\Bruker\TopSpin3.6.2} 2309 2 - 75 MHz

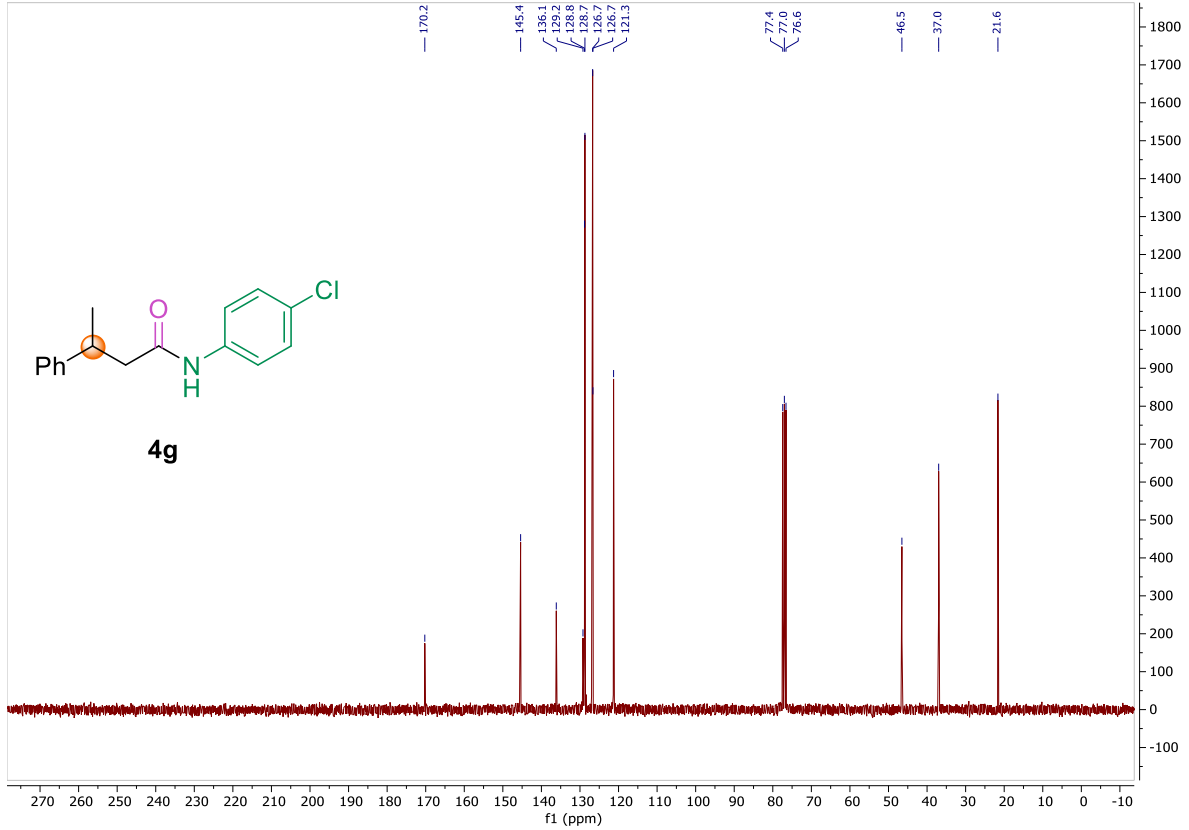

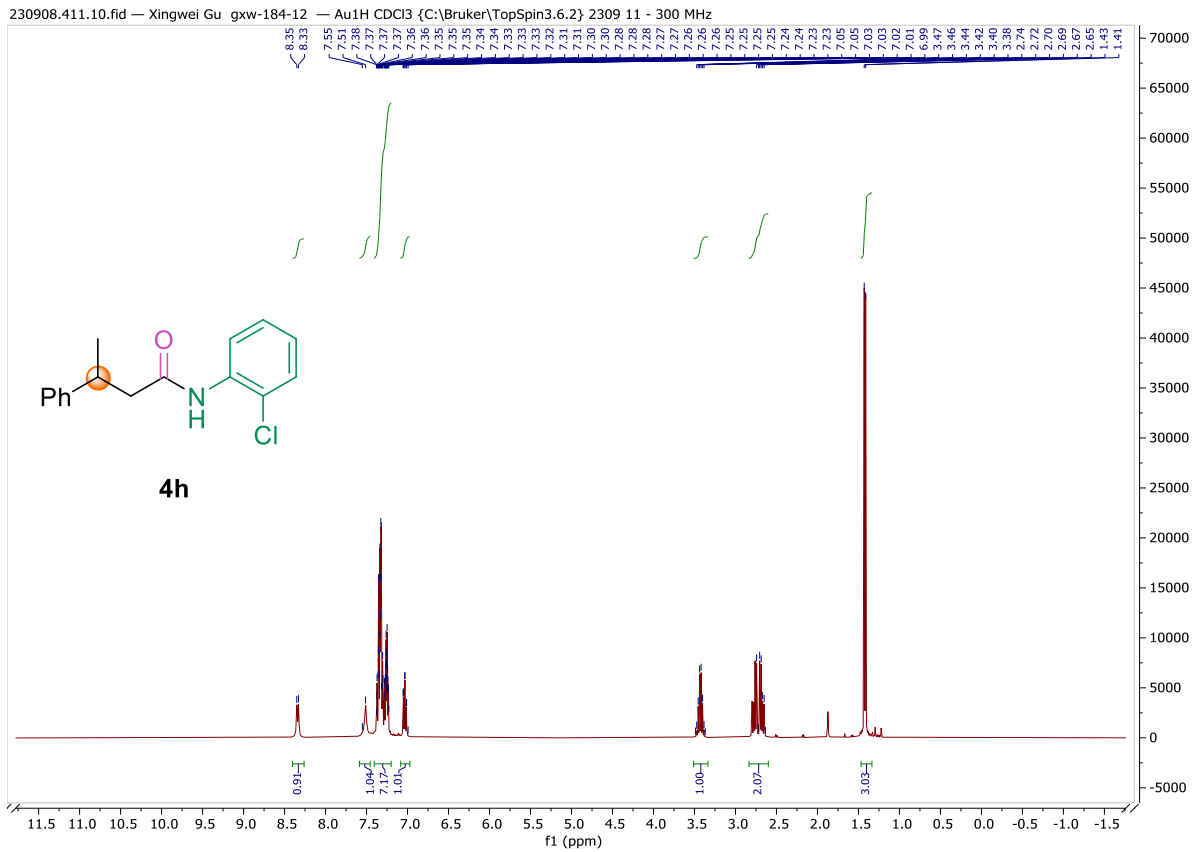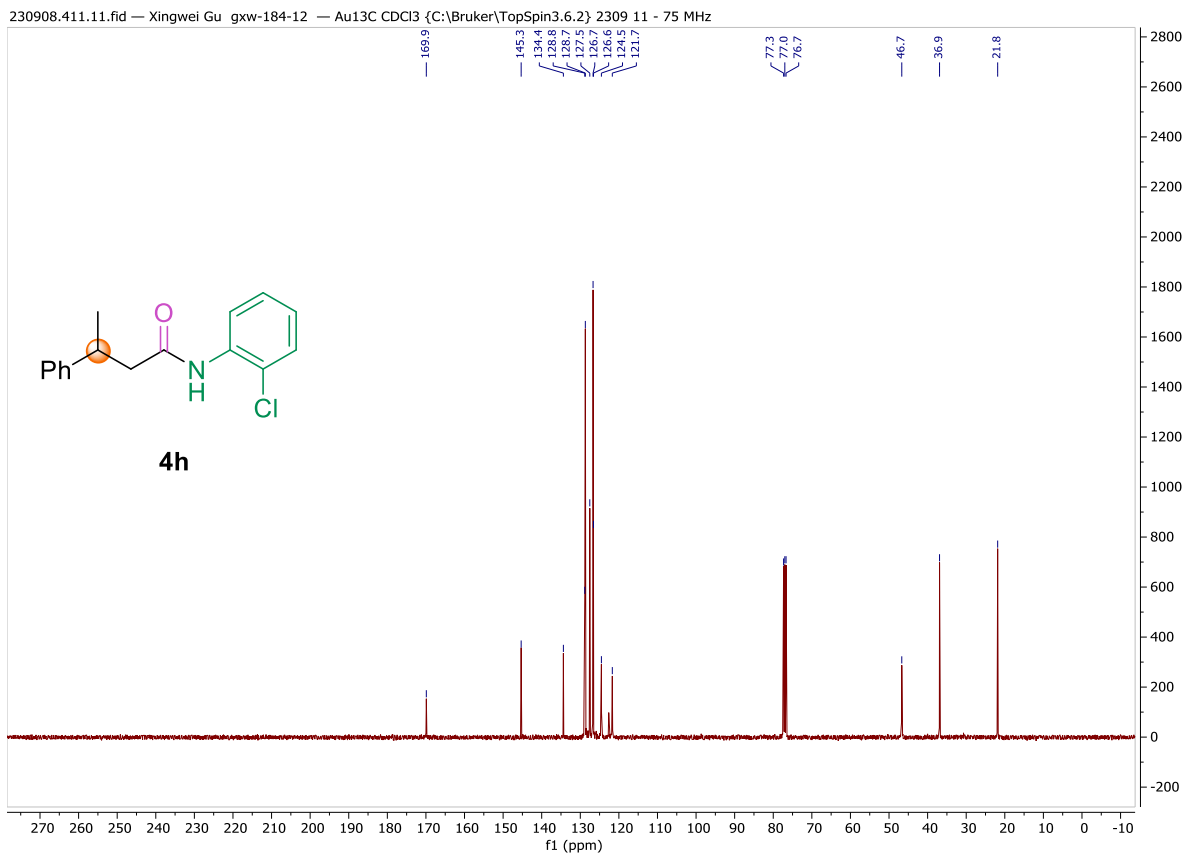



231005.313.10.fid — Xingwei Gu gxw-194-1 — Au1H CDCl3 {C:\Bruker\TopSpin3.6.2} 2310 13 - 300 MHz

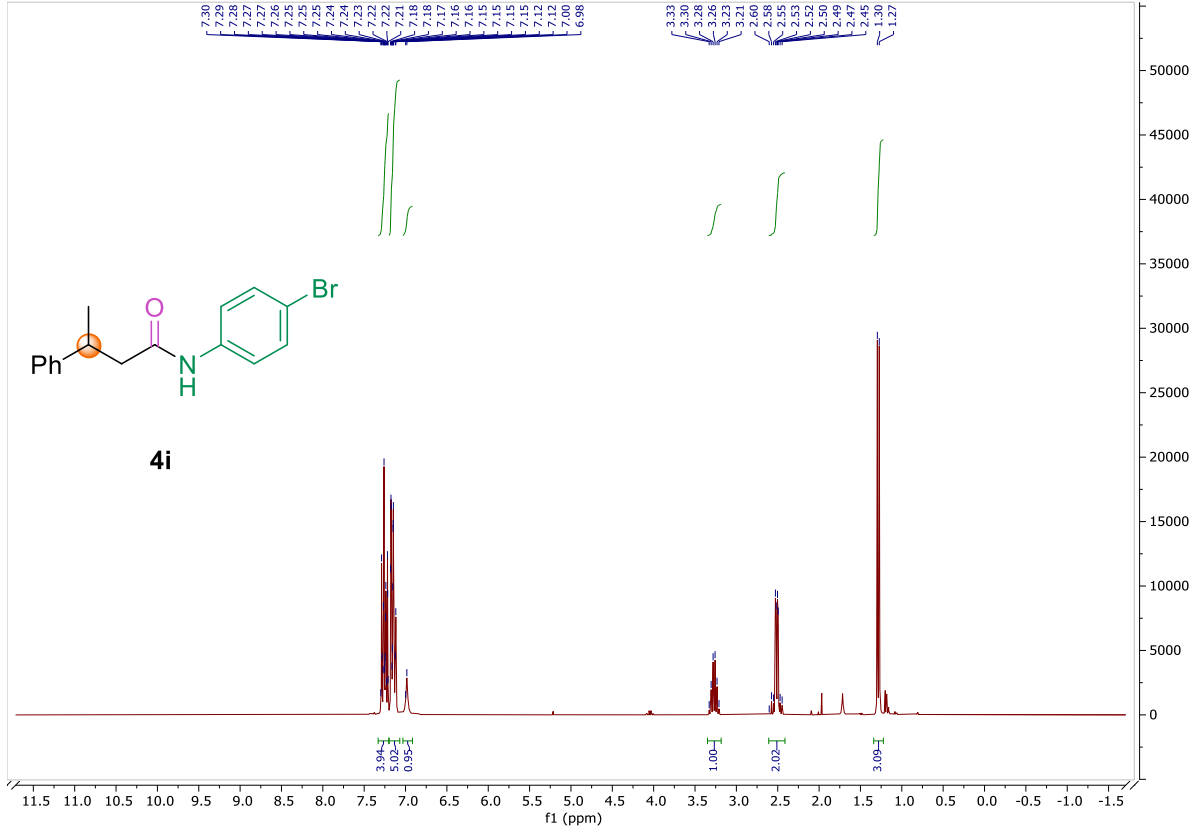

231001.303.11.fid — Xingwei Gu gxw-194-1 — Au13C CDCl3 {C:\Bruker\TopSpin3.6.2} 2310 3 - 75 MHz

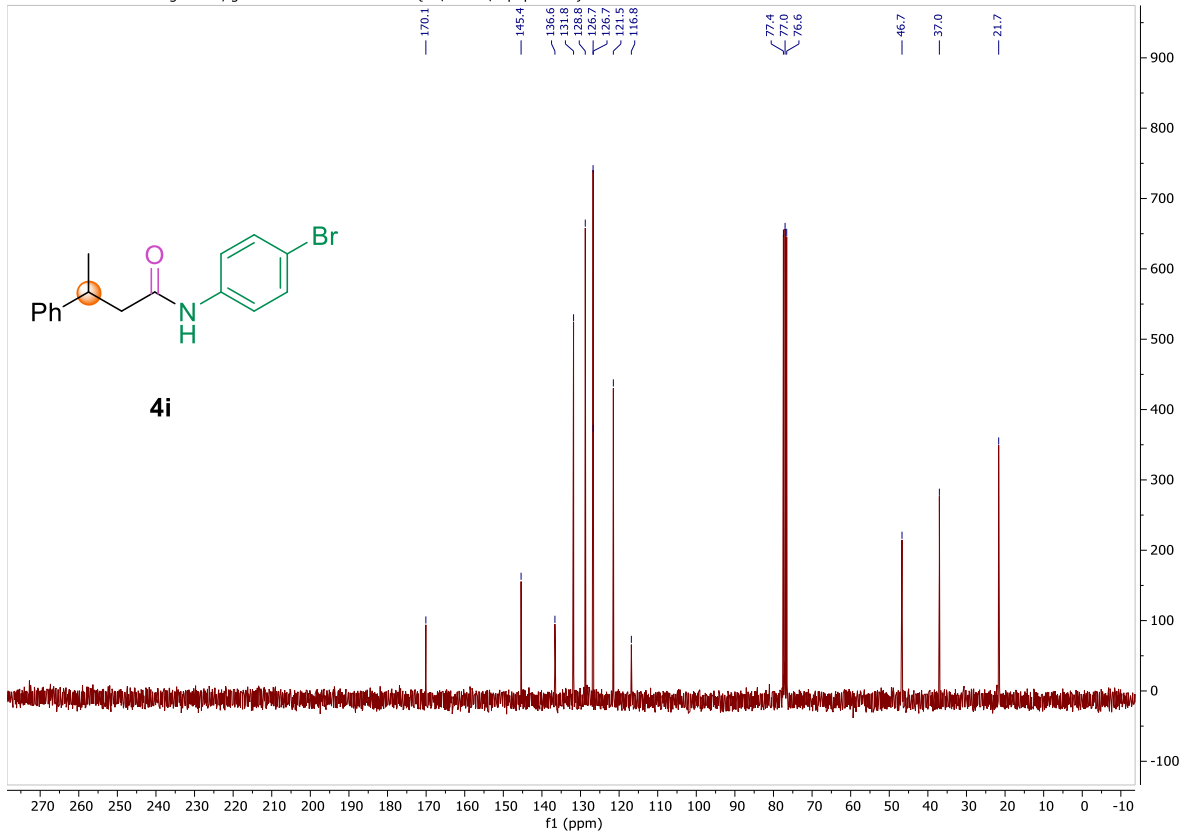

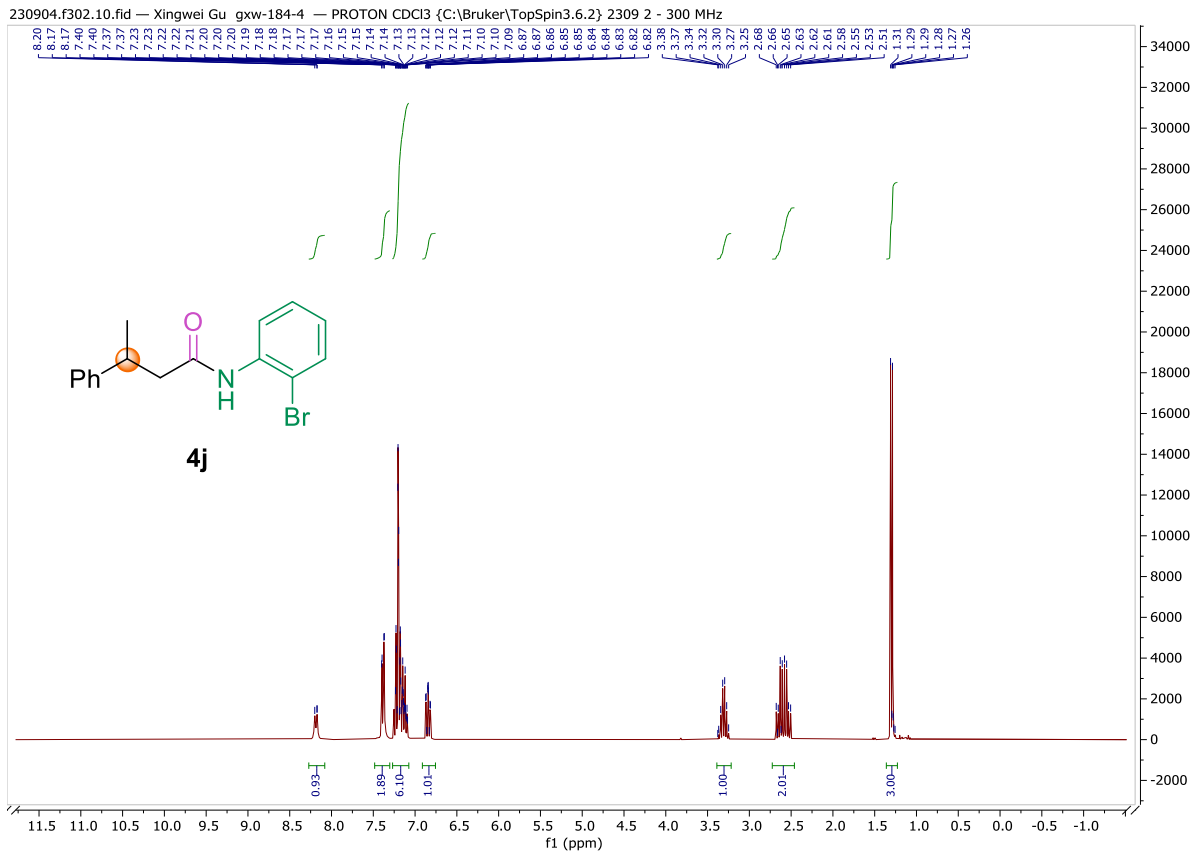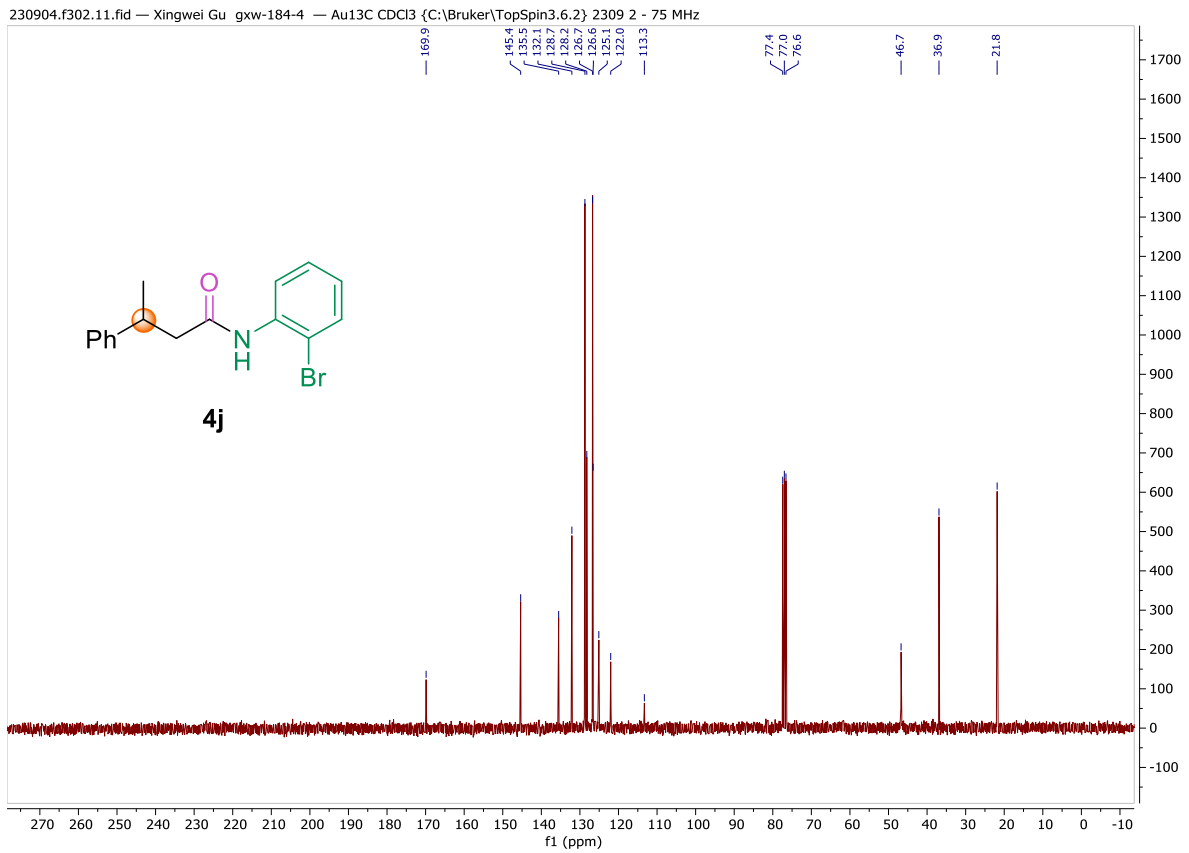

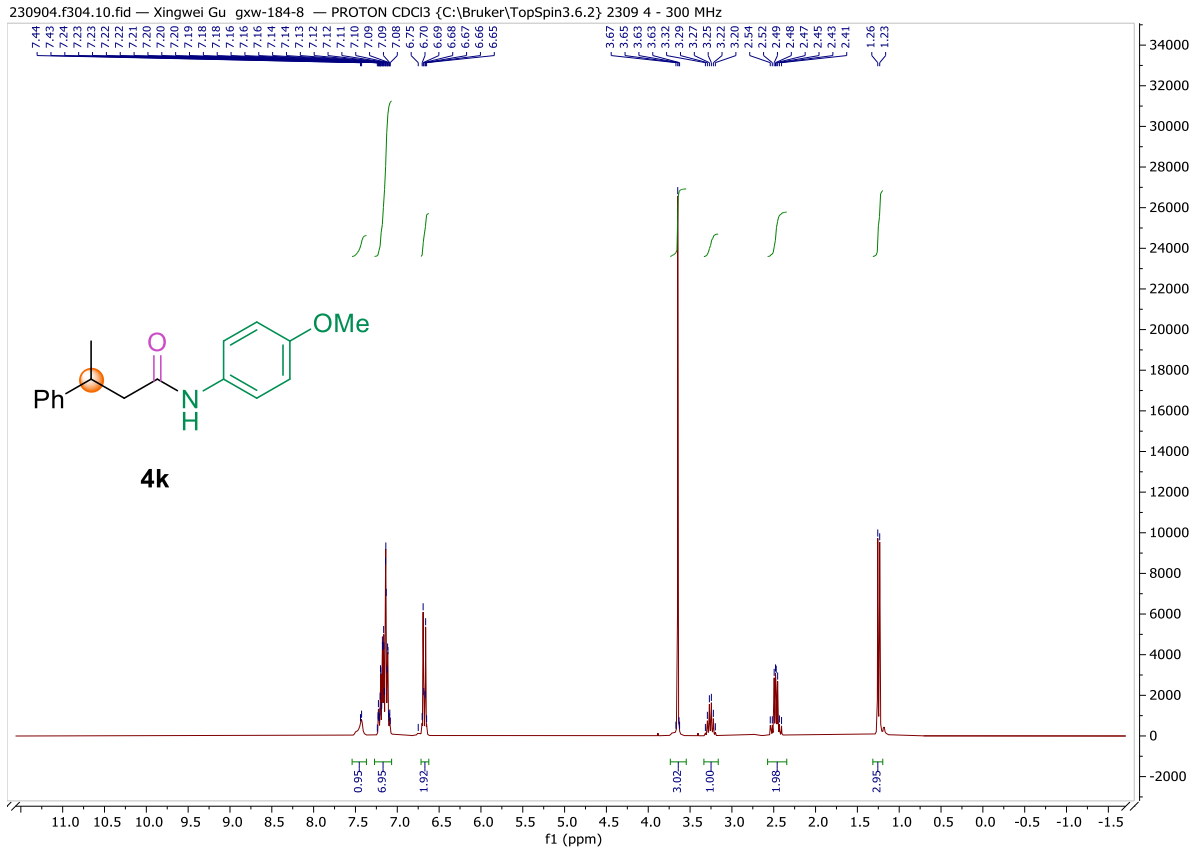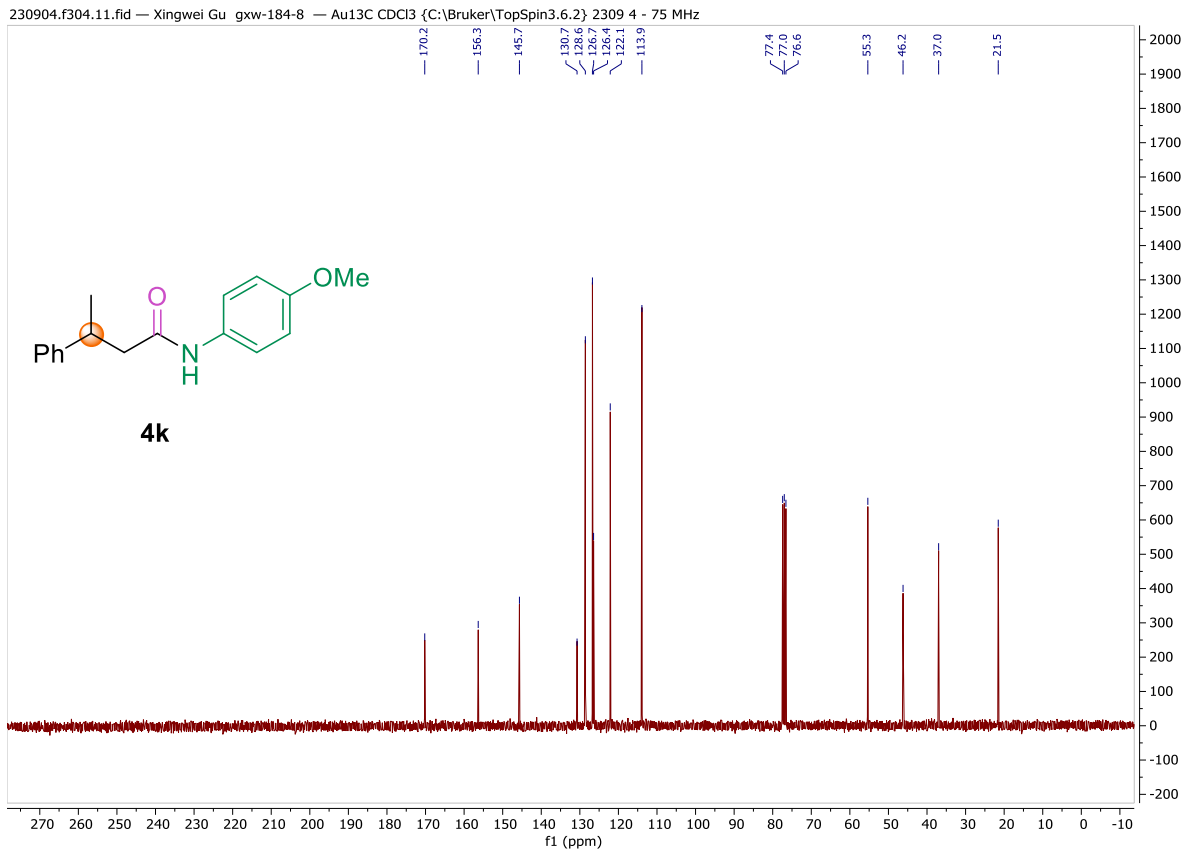

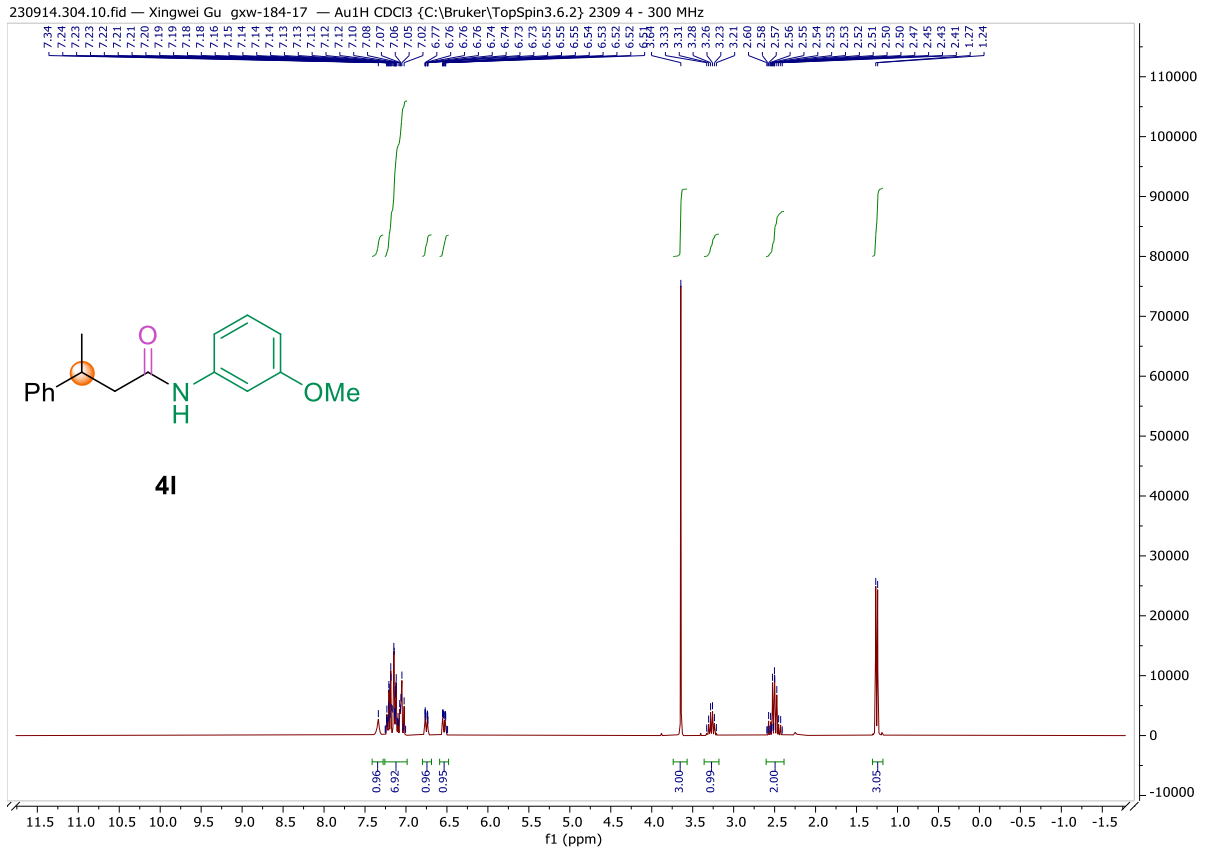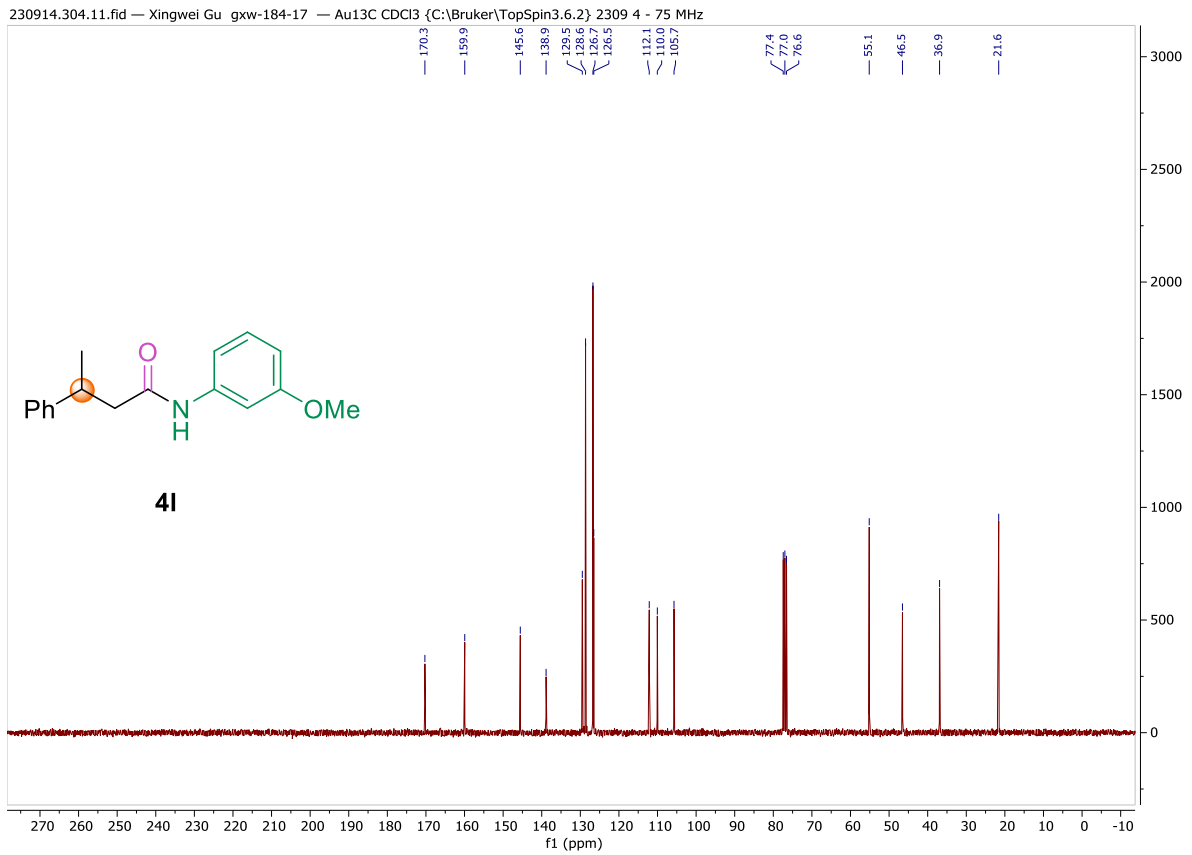

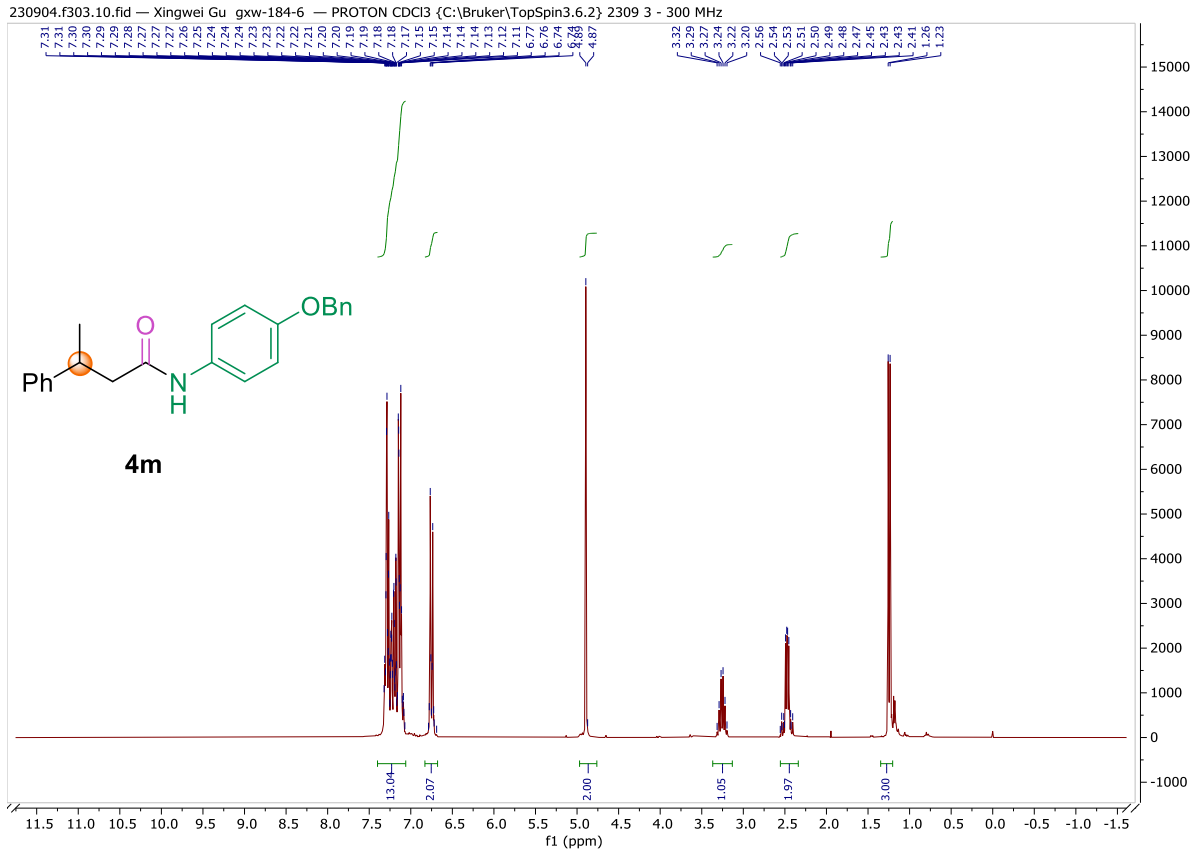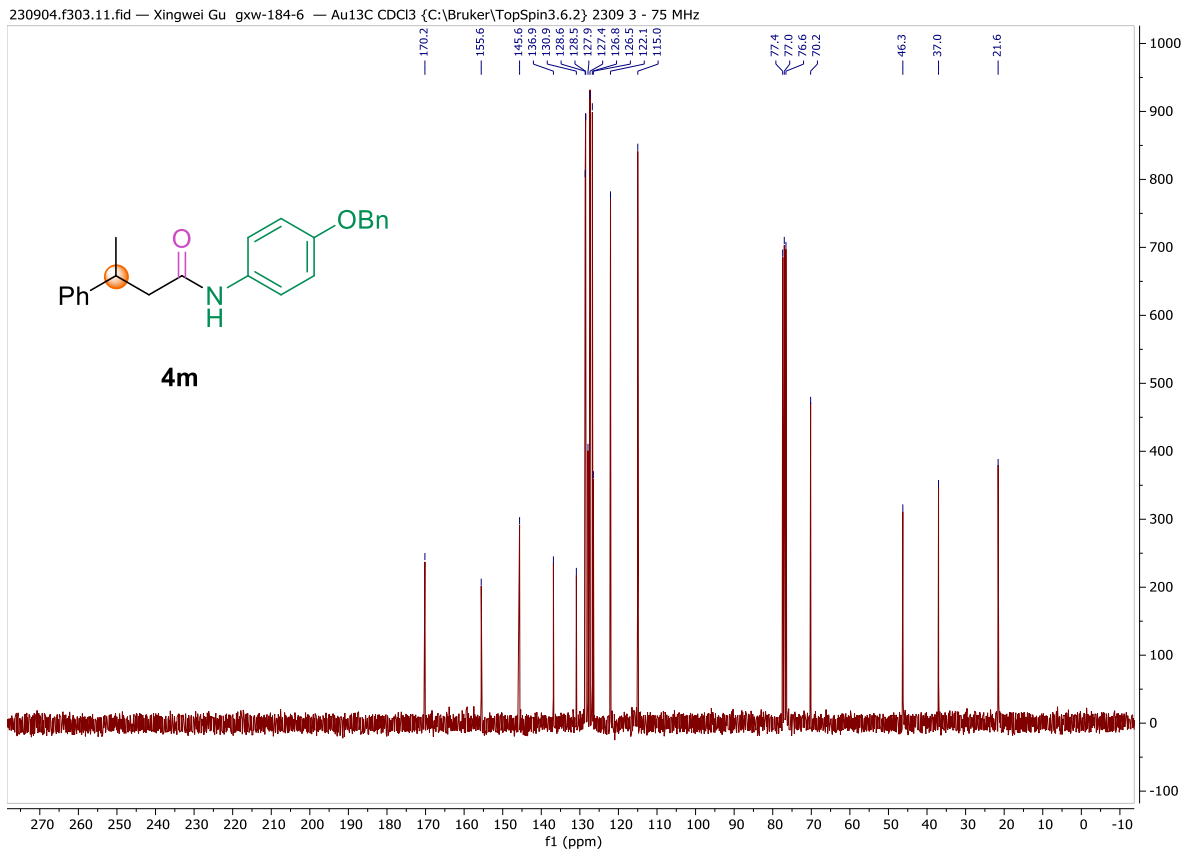

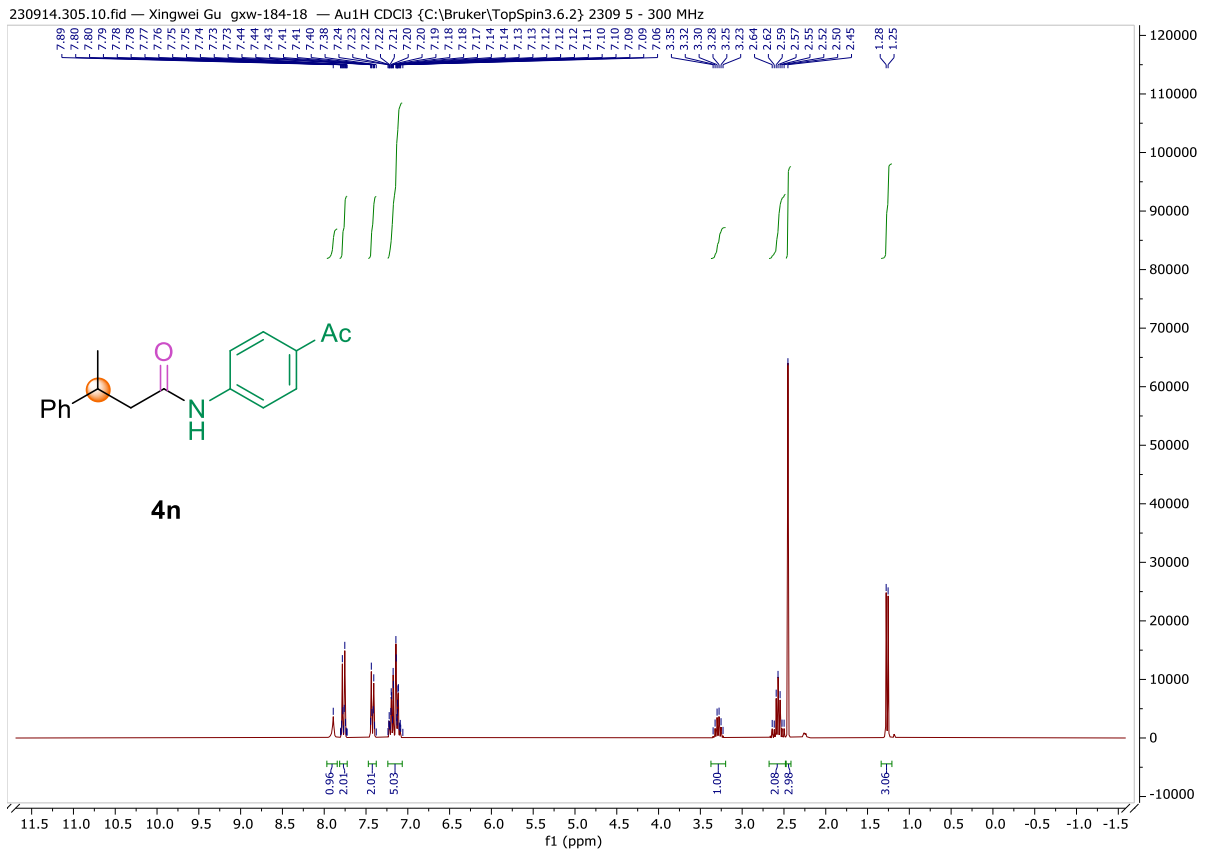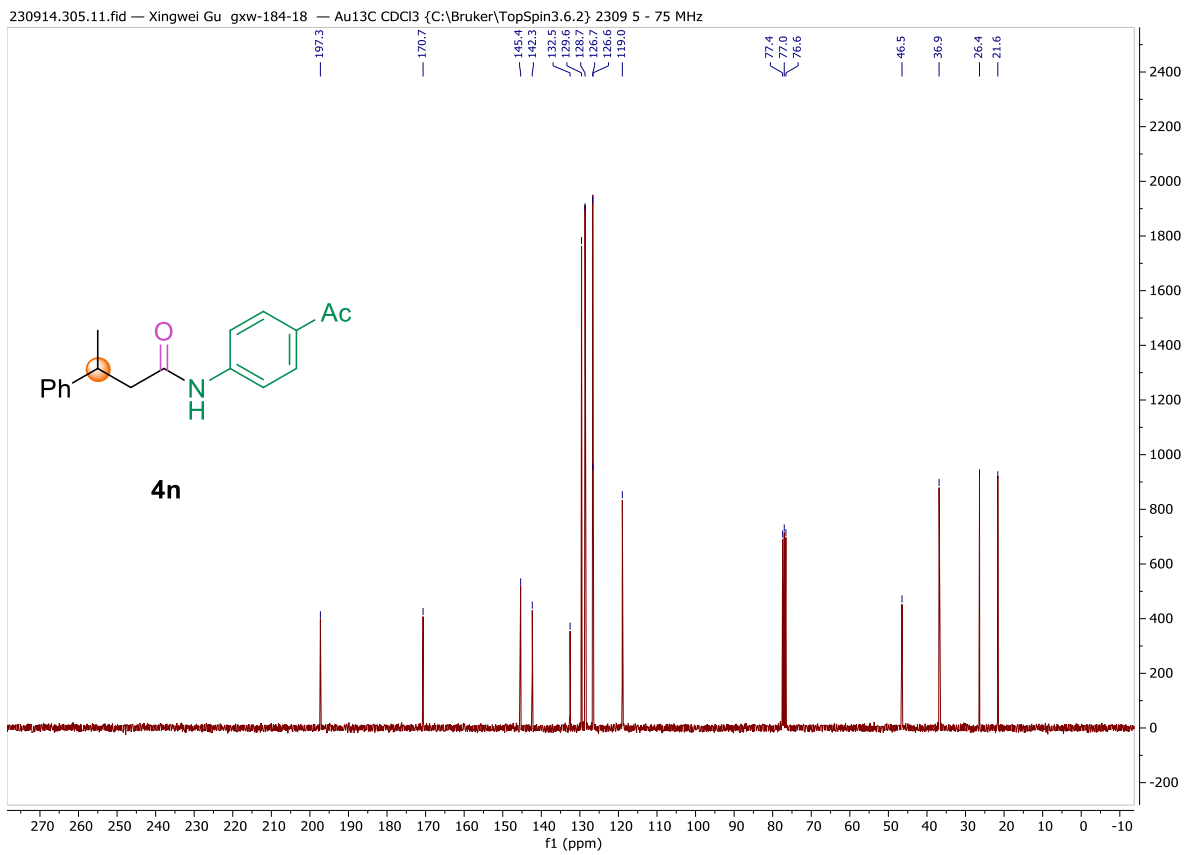

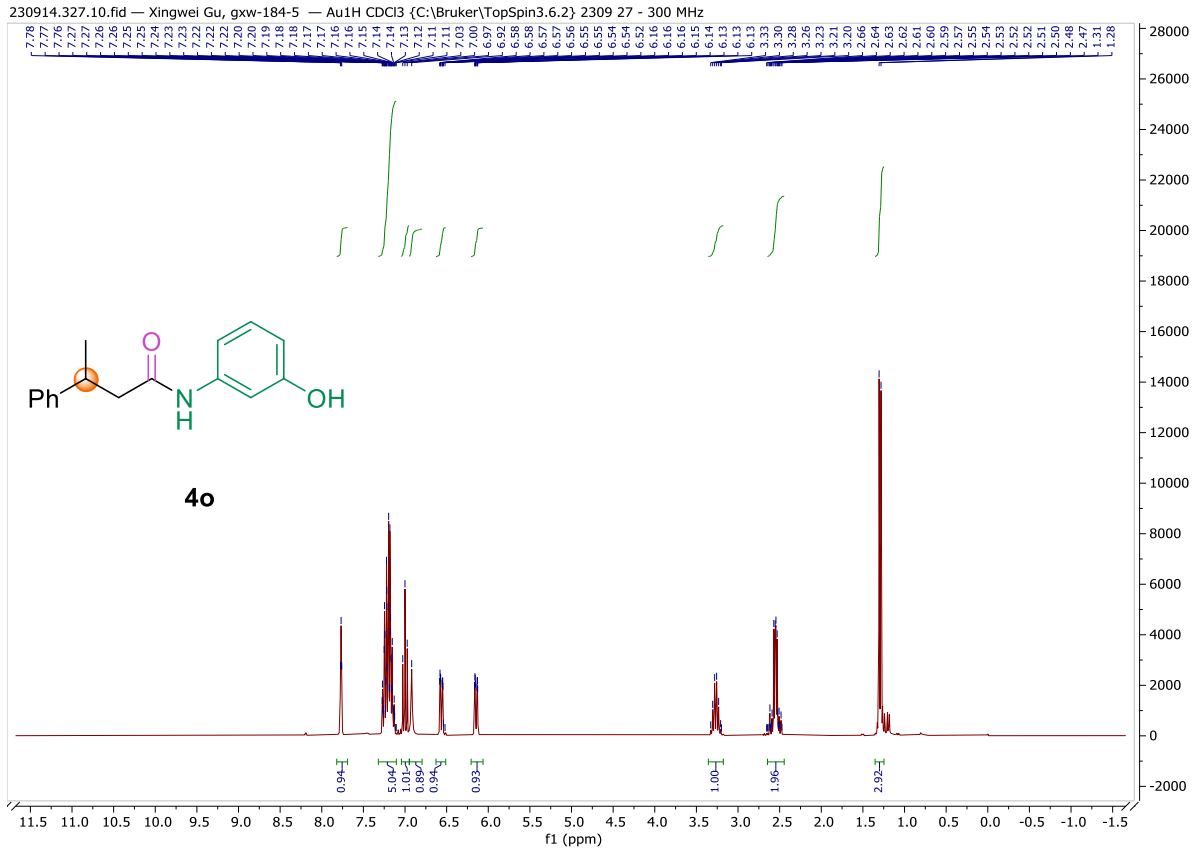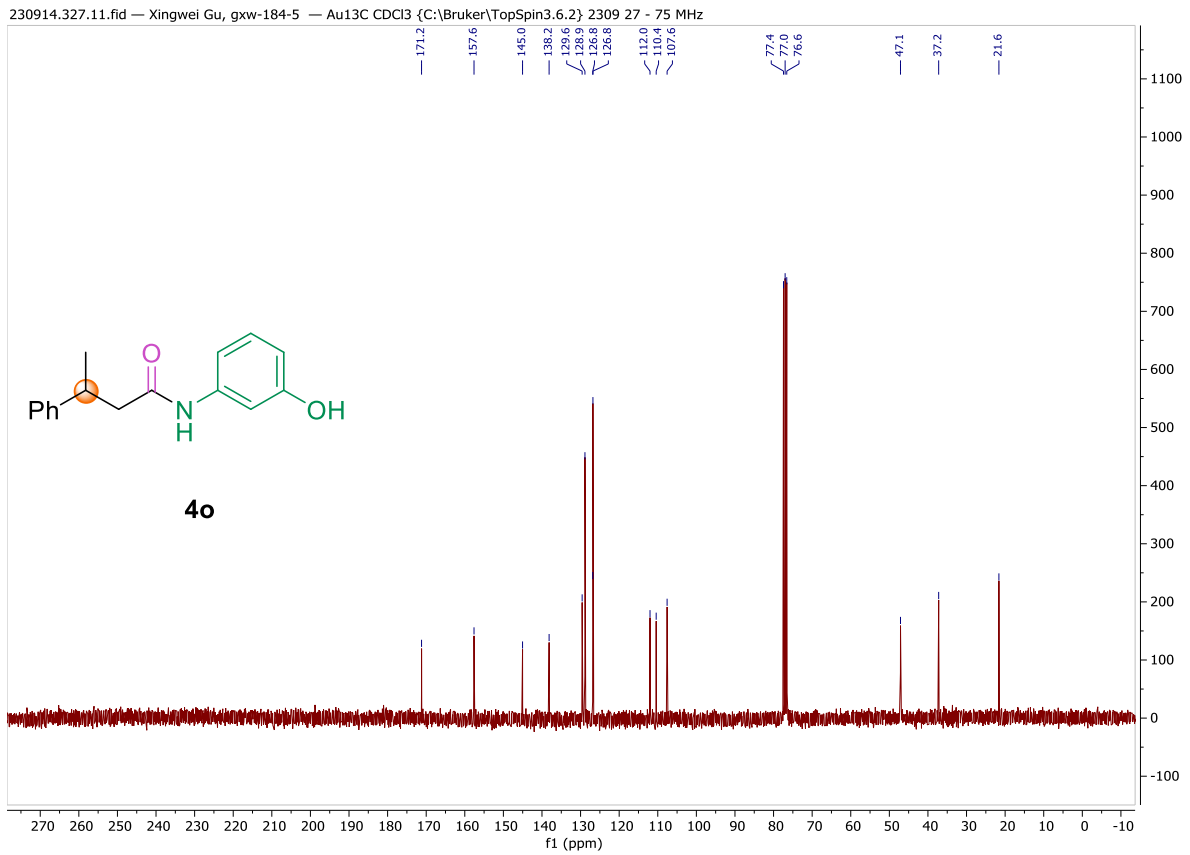

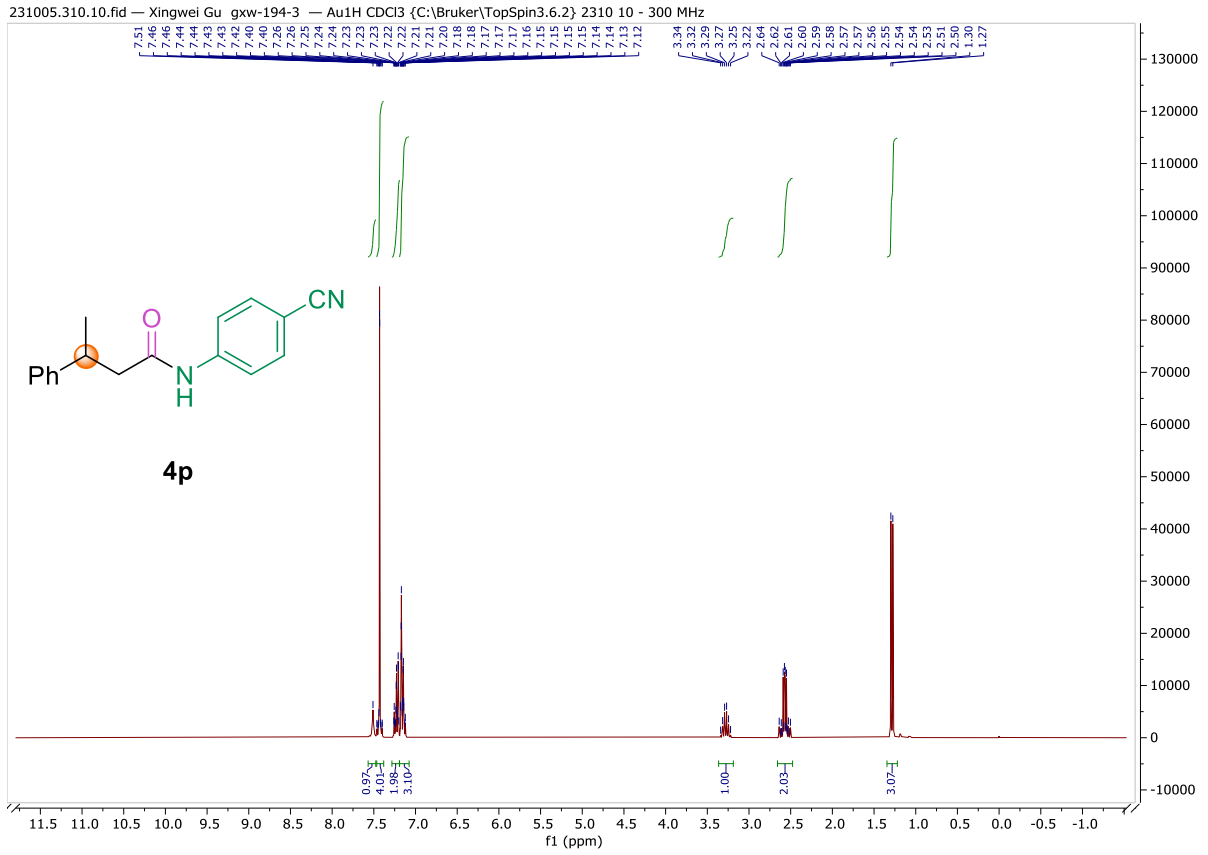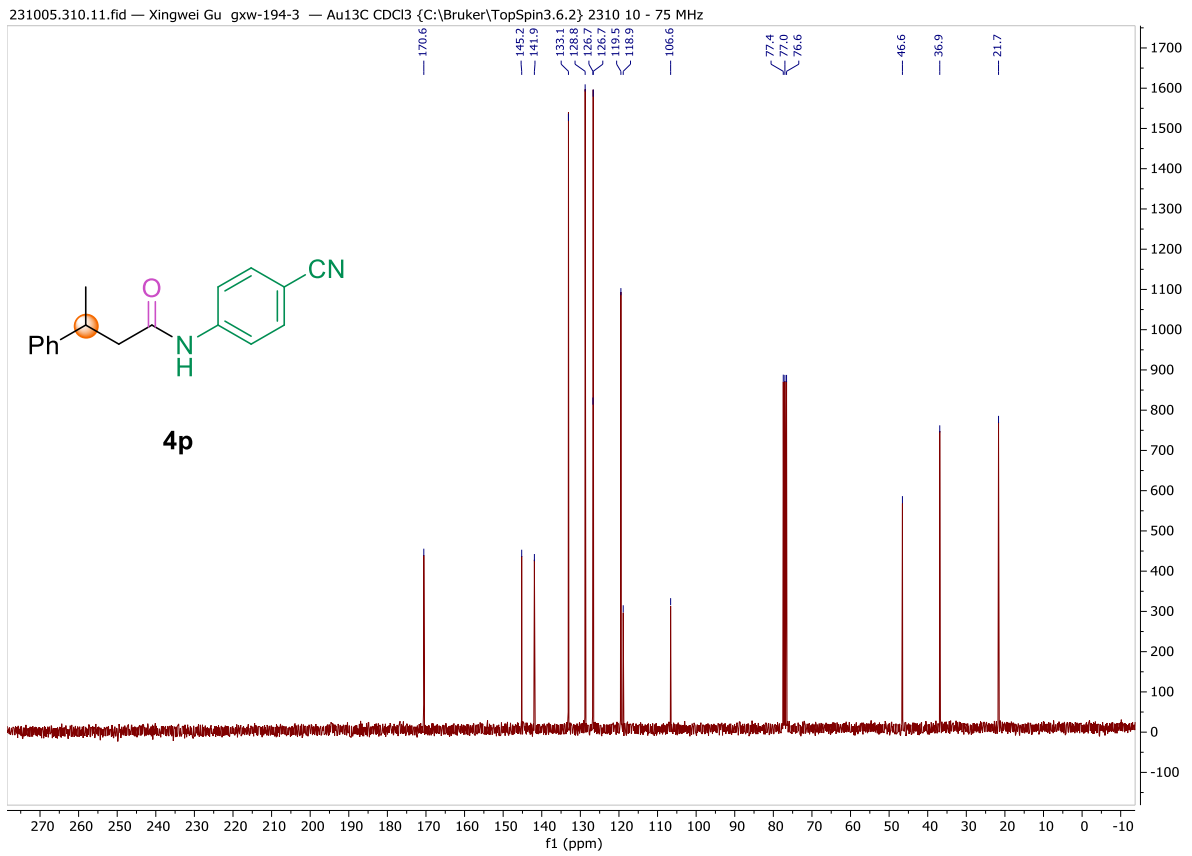



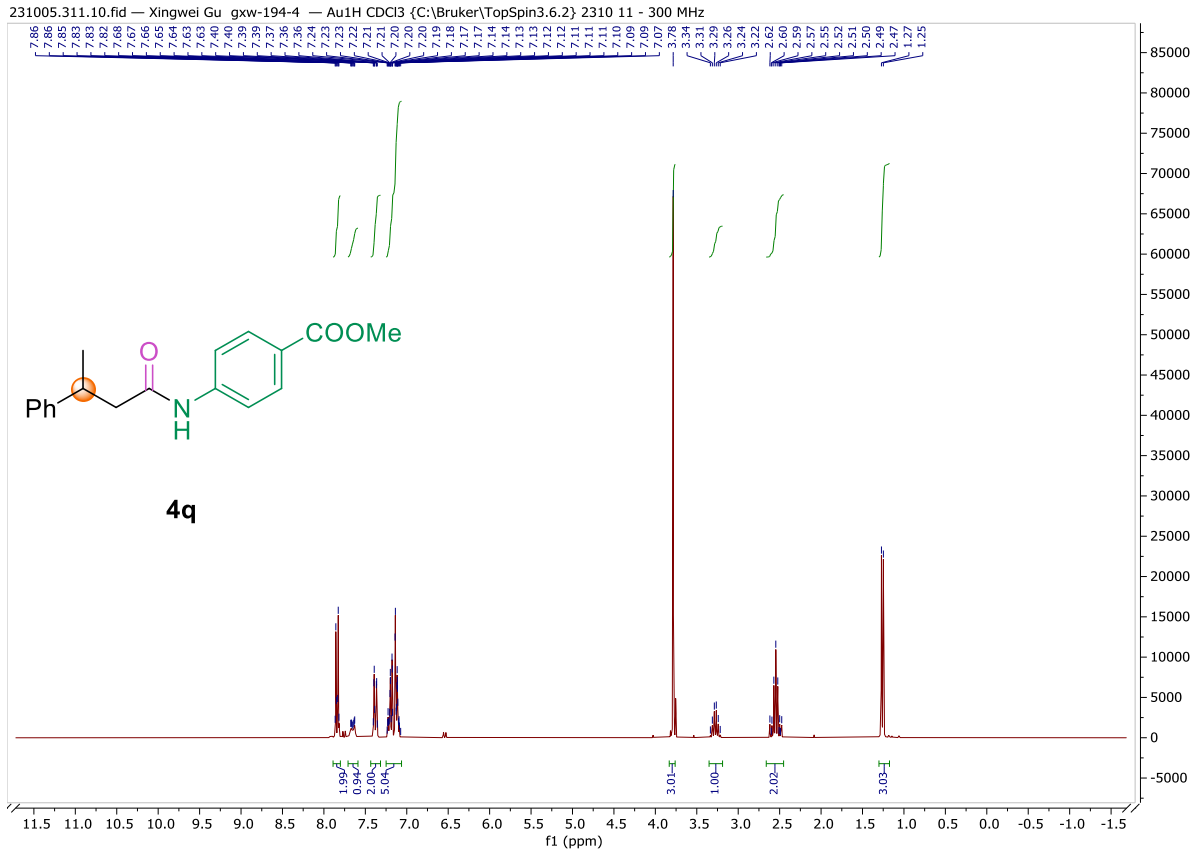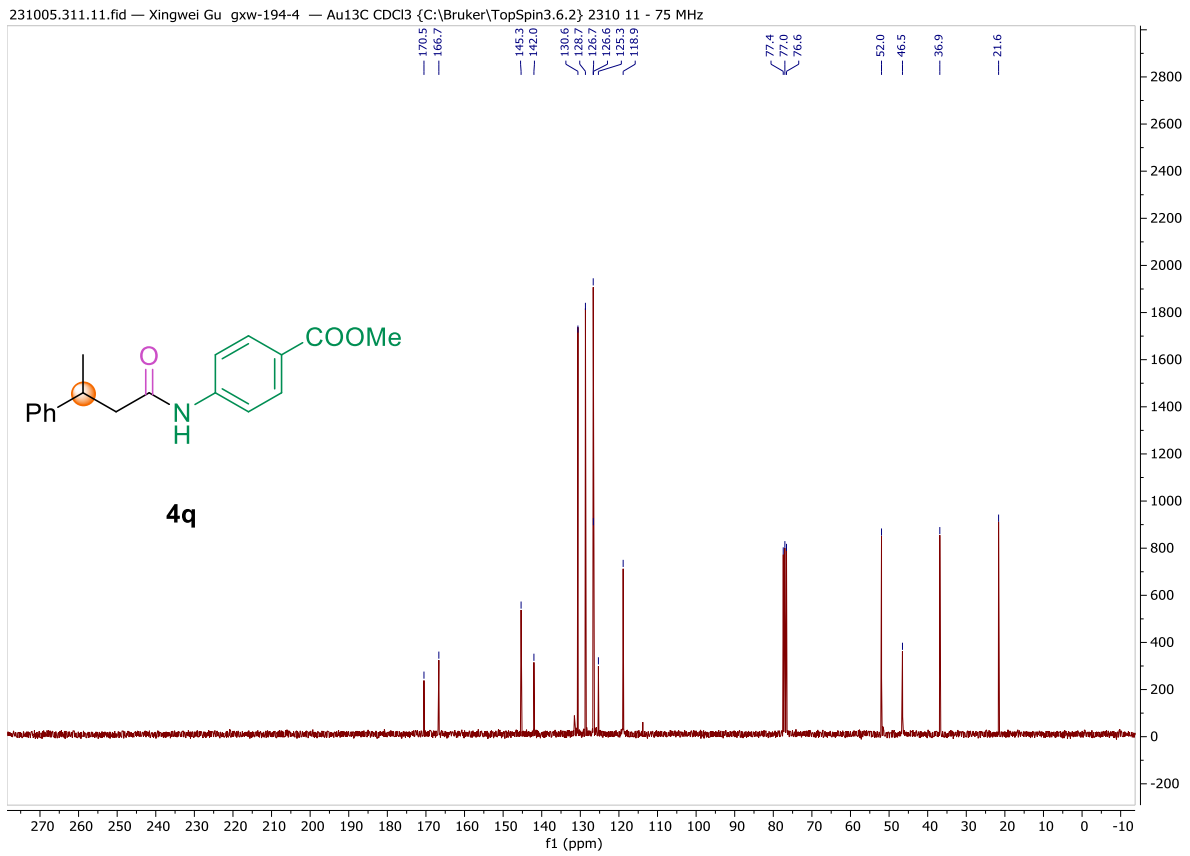

231009.f312.10.fid — Xingwei Gu gxw-194-9 — Au1H CDCl3 {C:\Bruker\TopSpin3.6.2} 2310 12 - 300 MHz

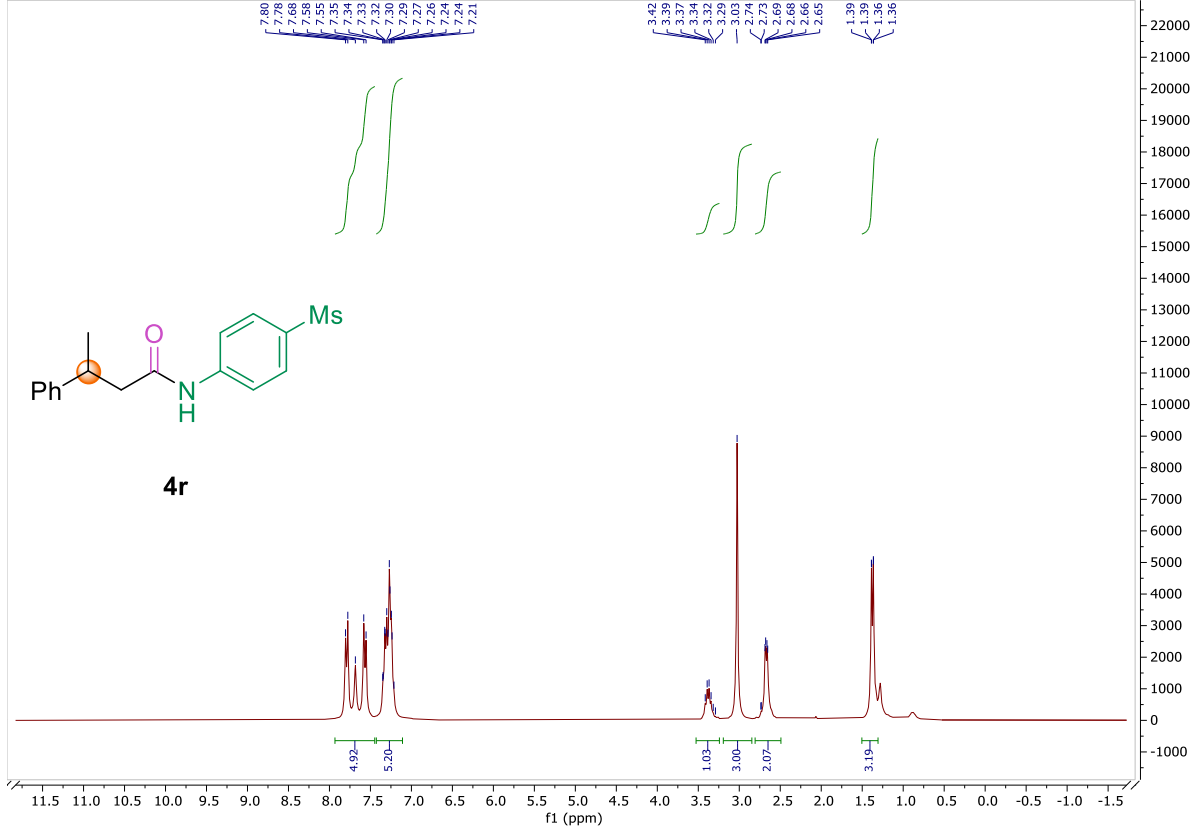

231009.f312.11.fid — Xingwei Gu gxw-194-9 — Au13C CDCl3 {C:\Bruker\TopSpin3.6.2} 2310 12 - 75 MHz

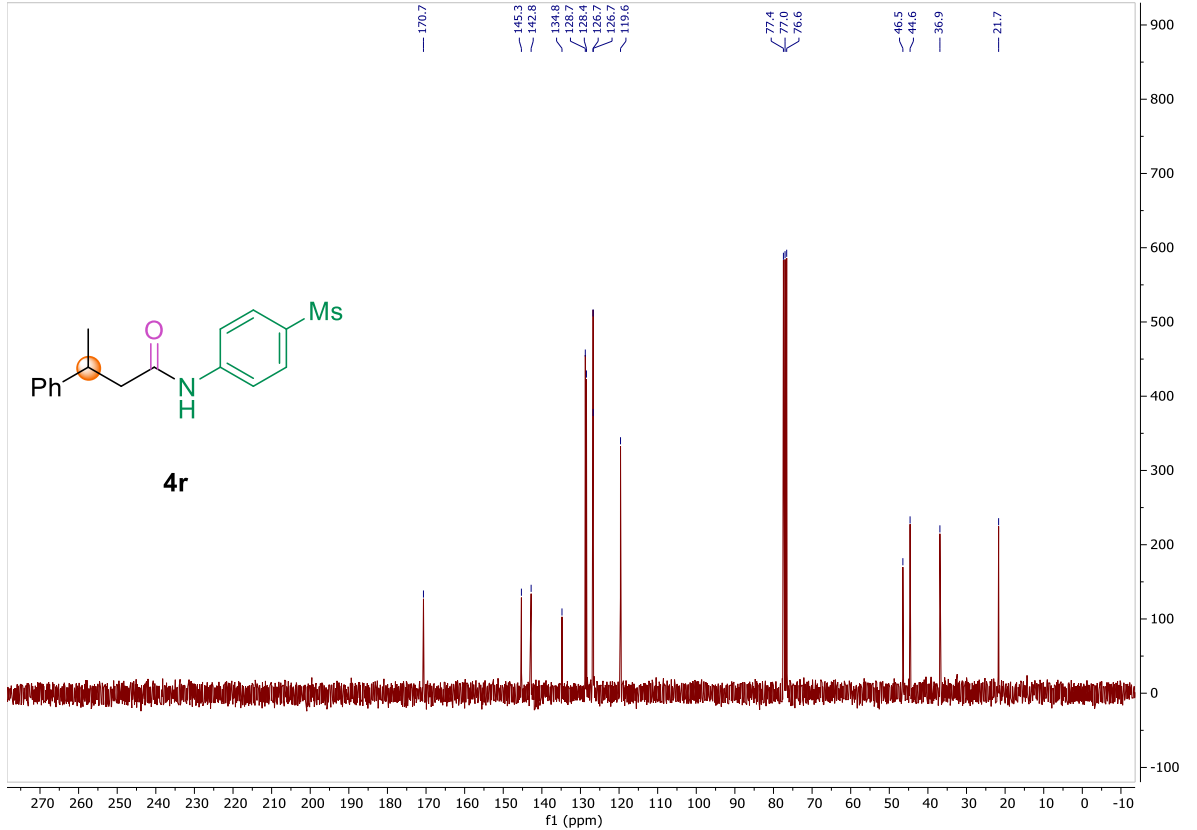

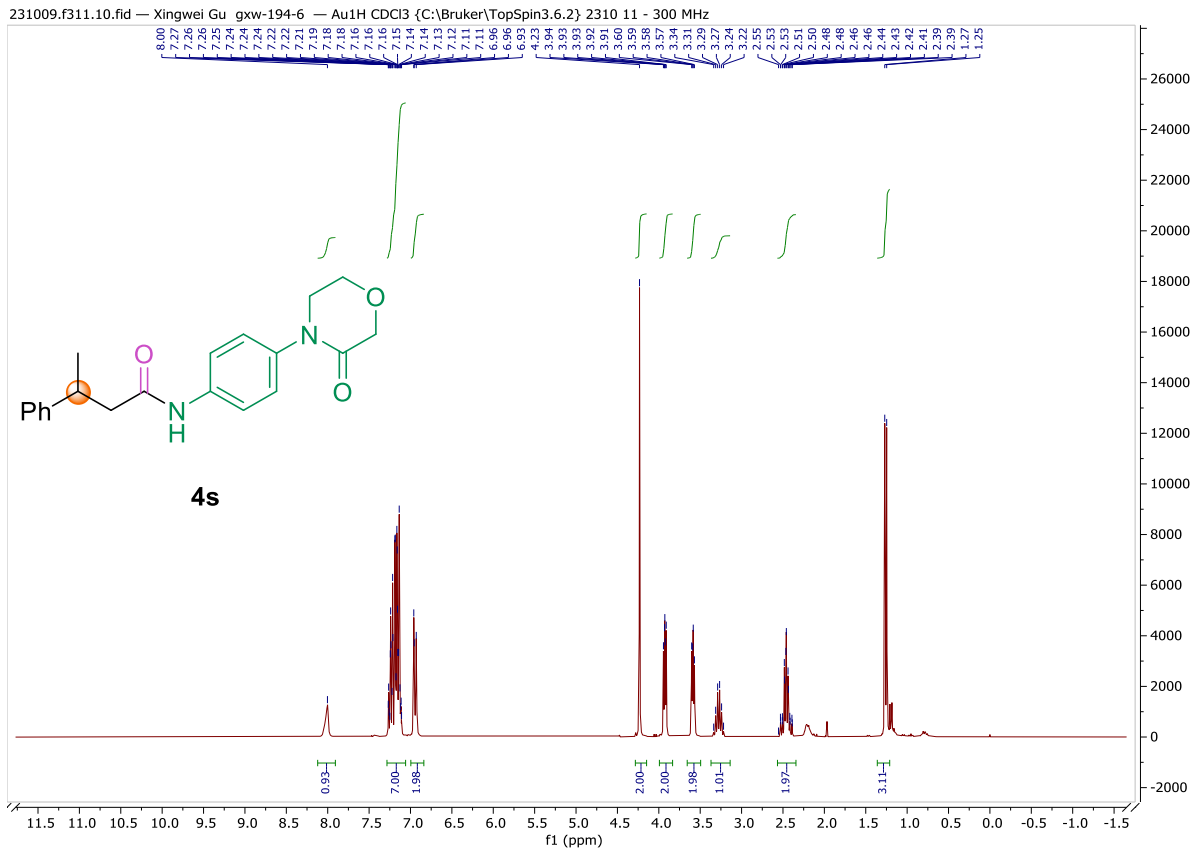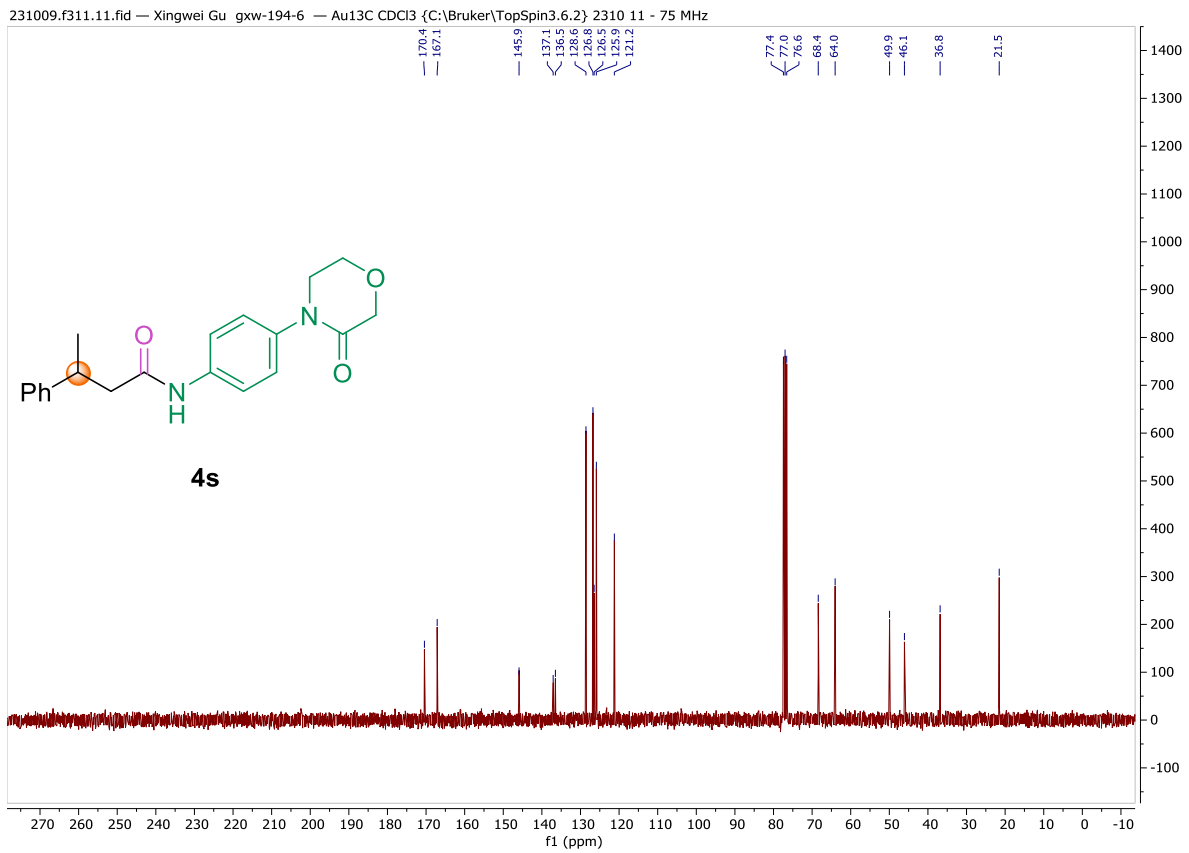

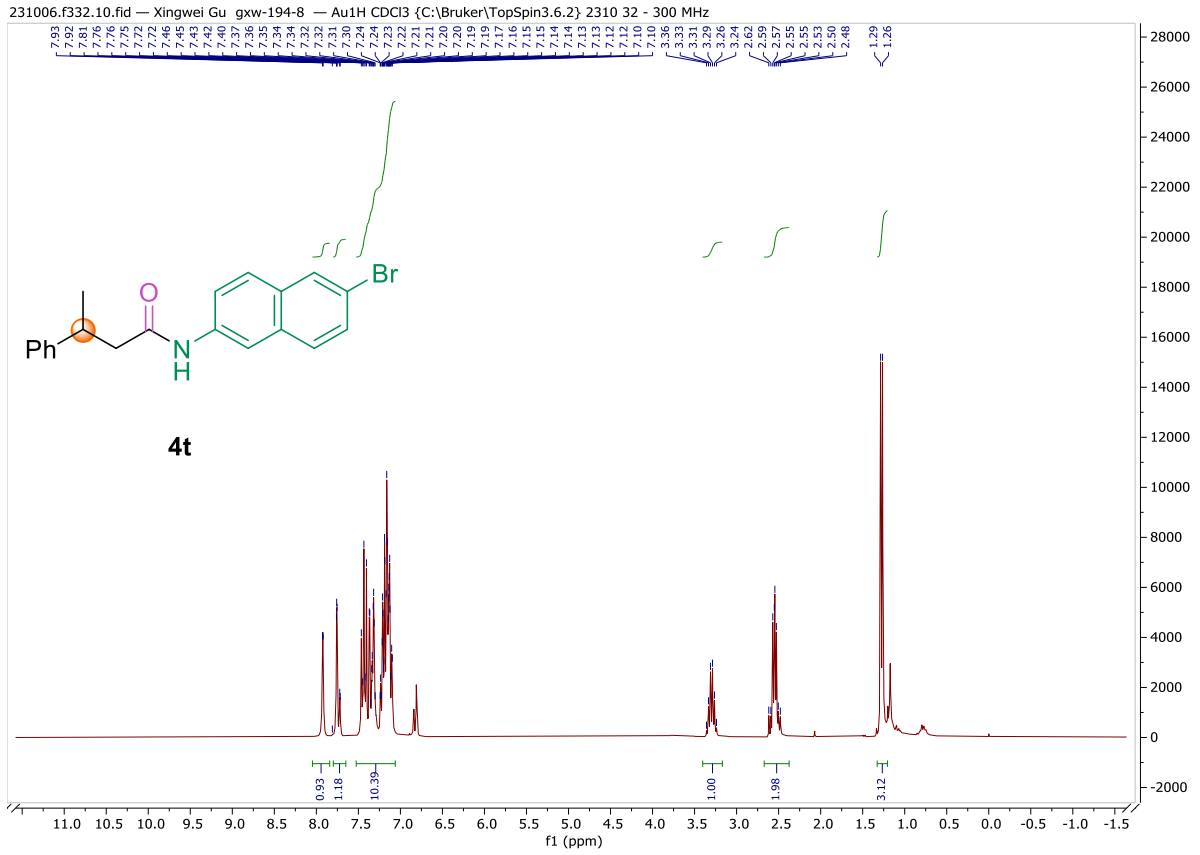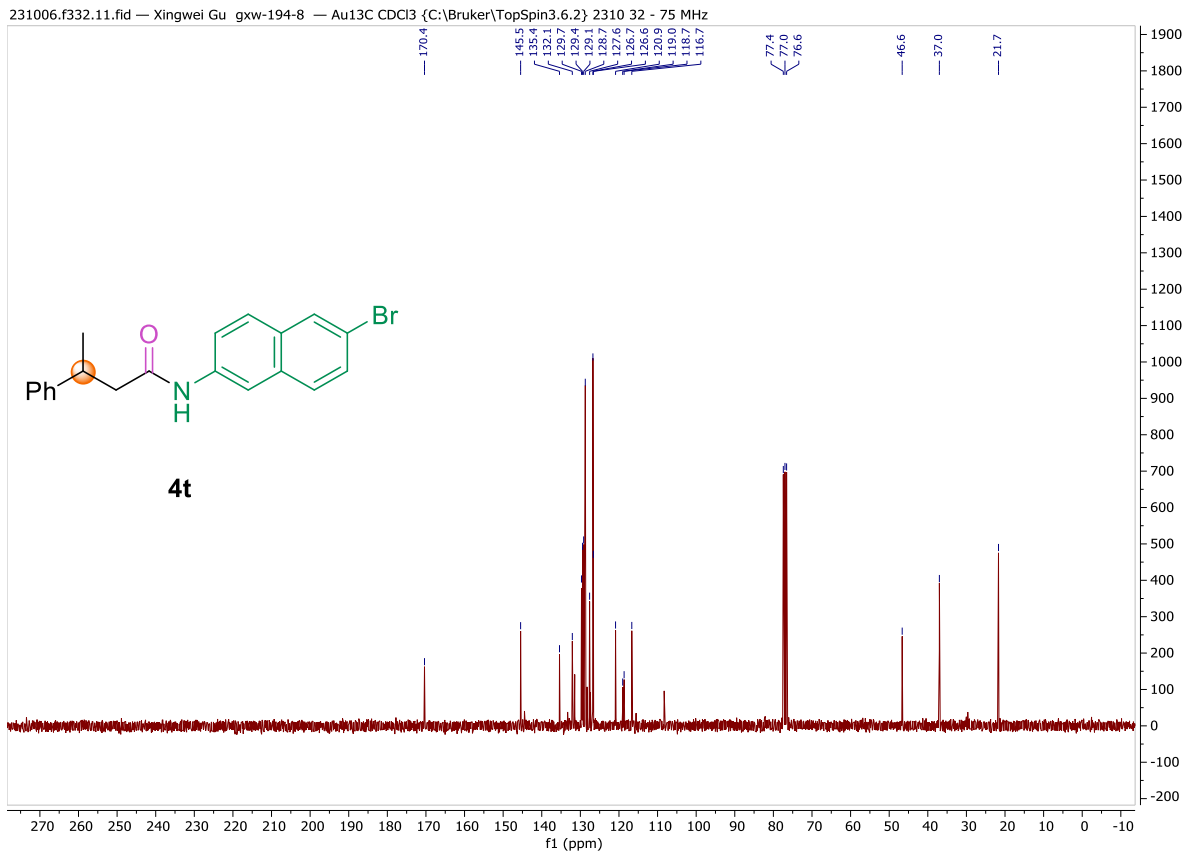

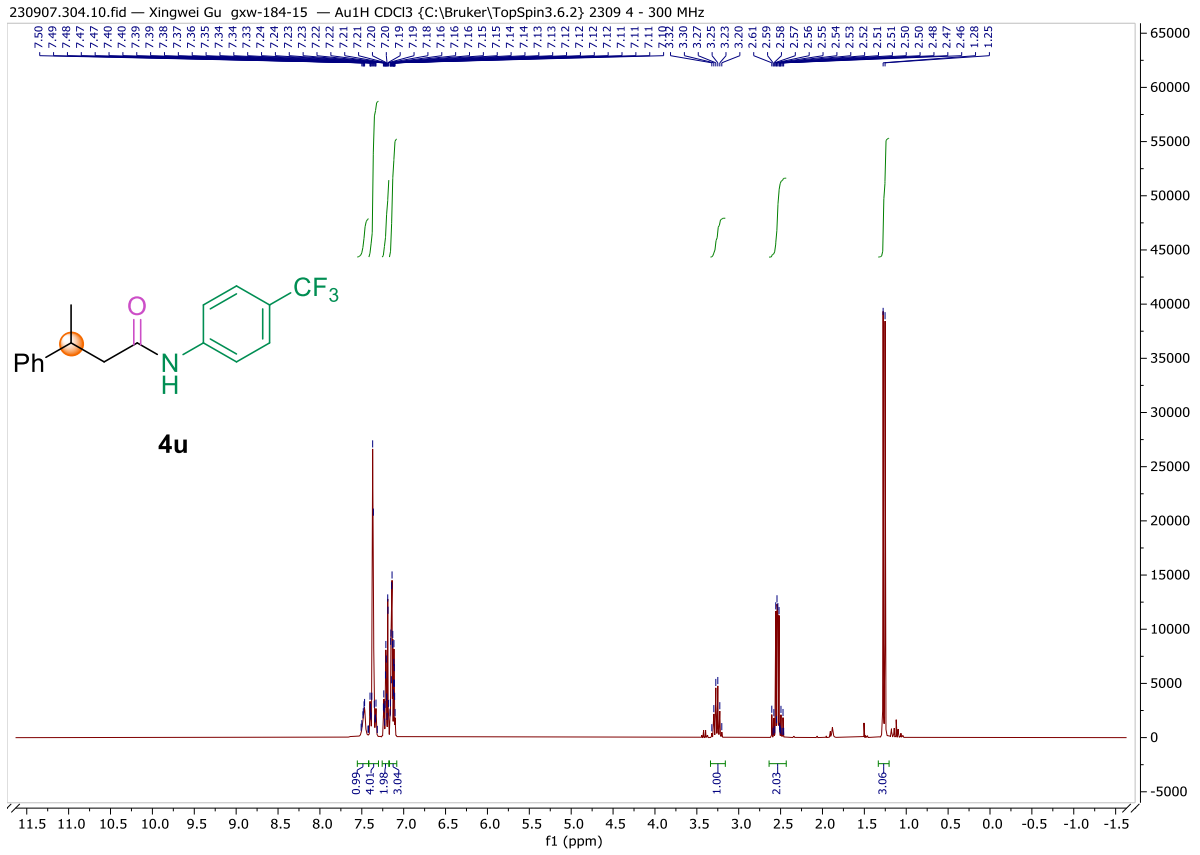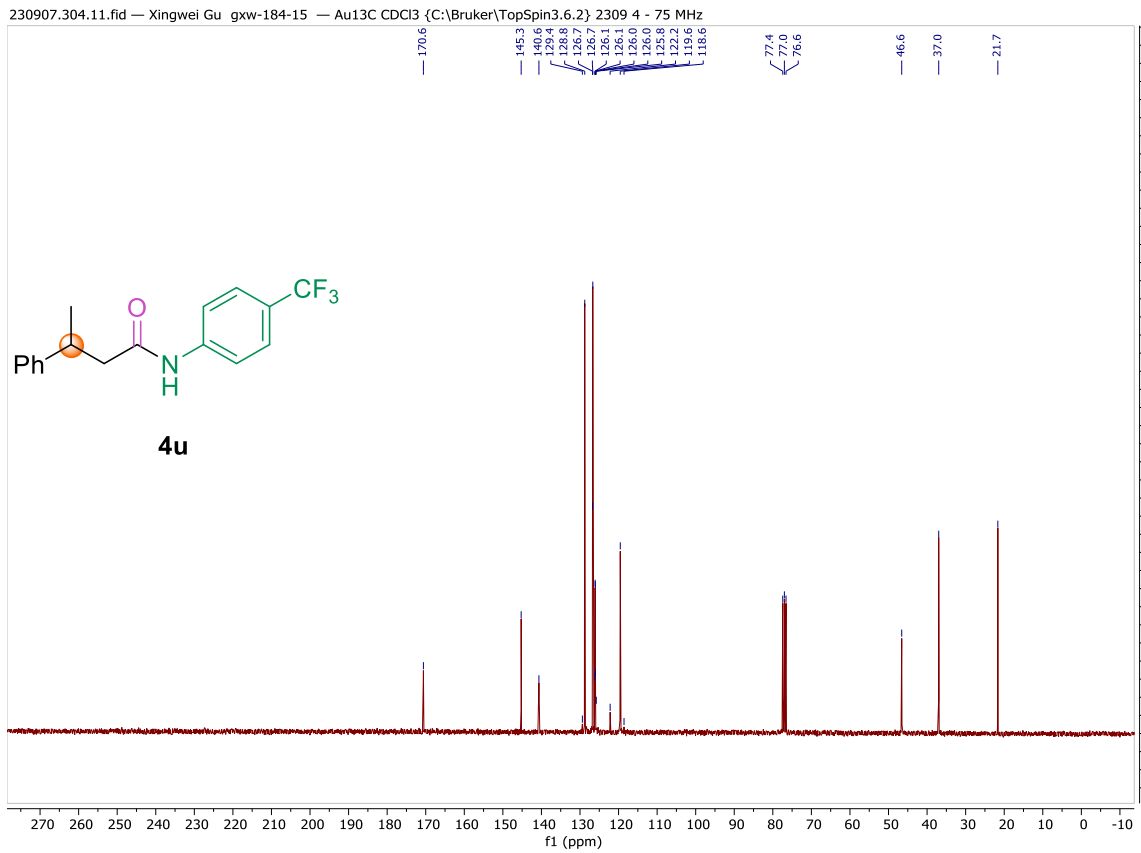

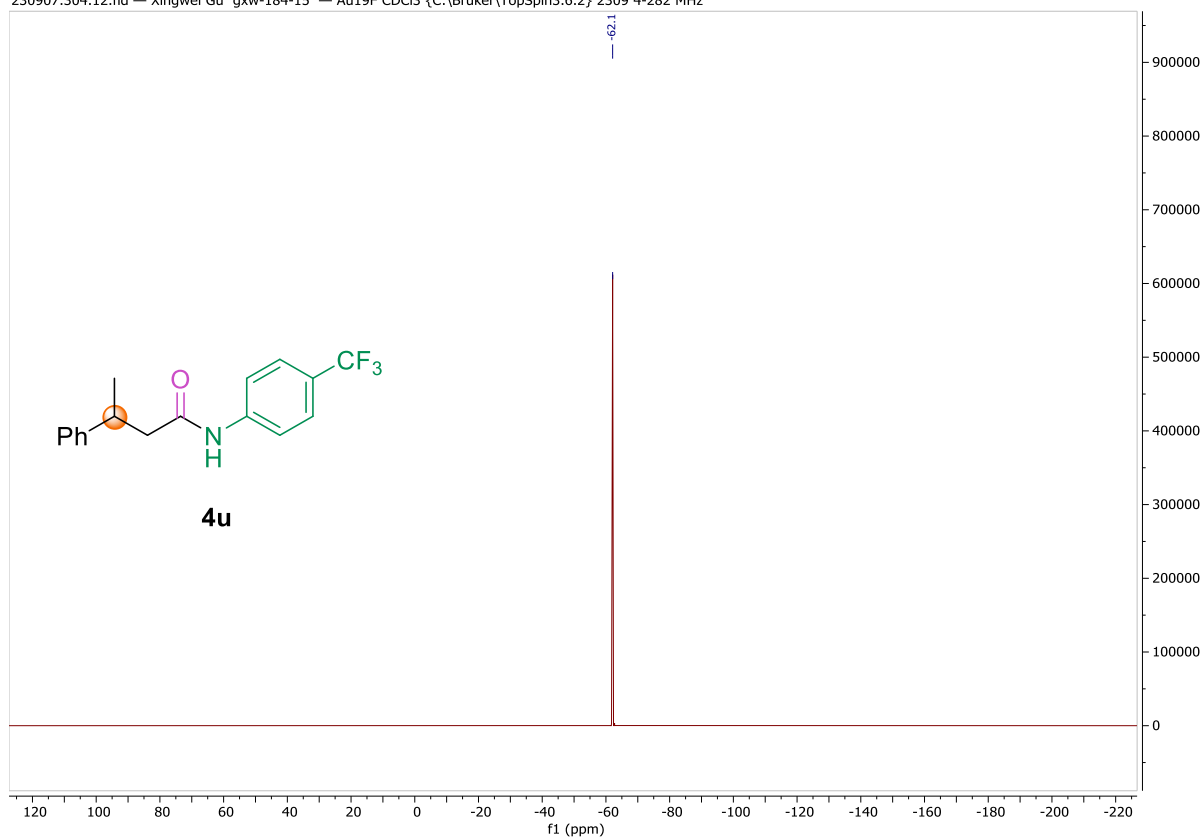

231004.302.10.fid — Xingwei Gu gxw-194-5 — Au1H CDCI3 {C:\Bruker\TopSpin3.6.2} 2310 2 - 300 MHz

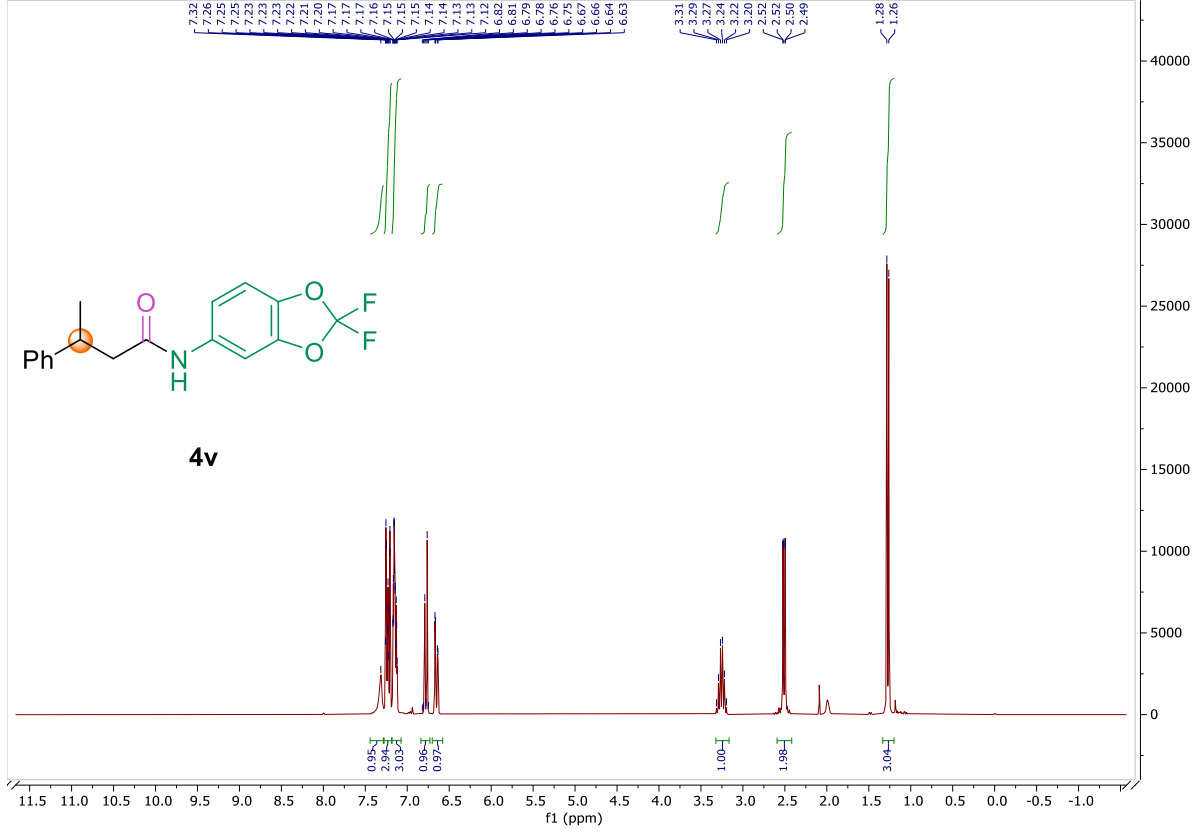

231001.301.11.fid — Xingwei Gu gxw-194-5 — Au13C CDCI3 {C:\Bruker\TopSpin3.6.2} 2310 1 - 75 MHz

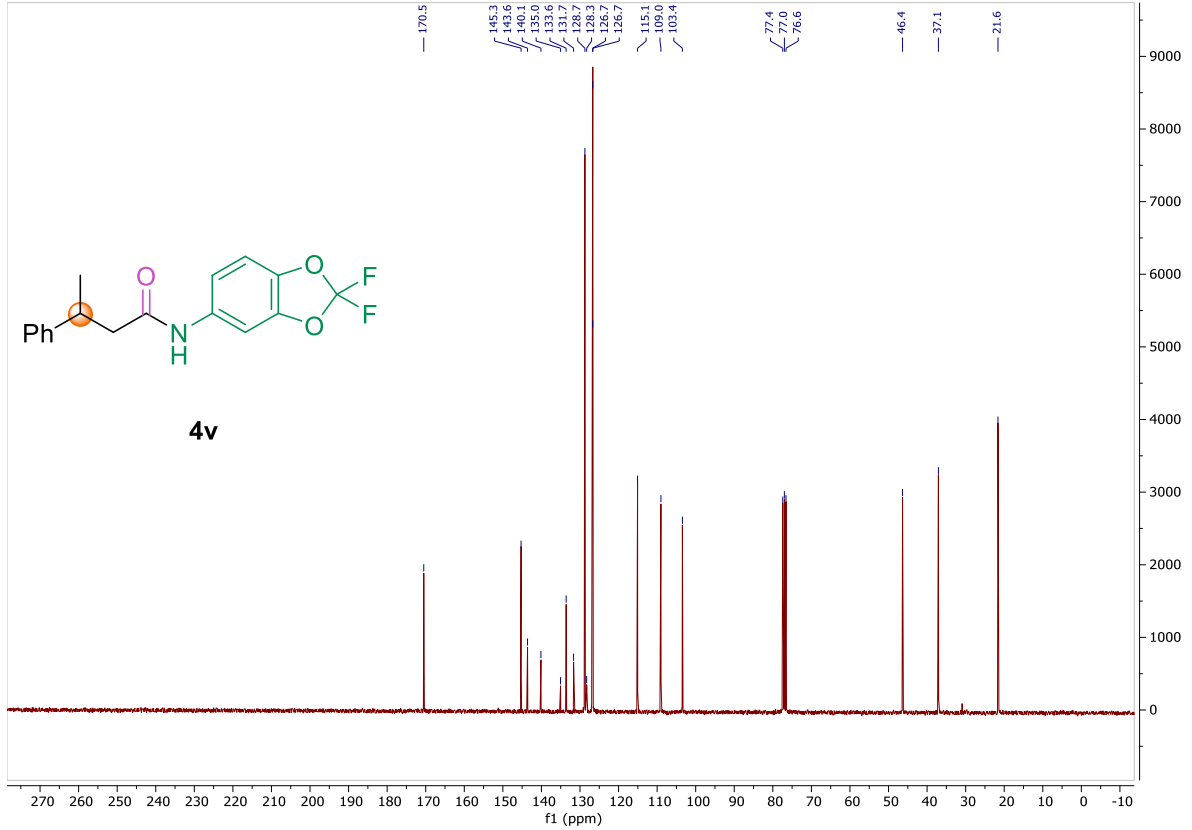

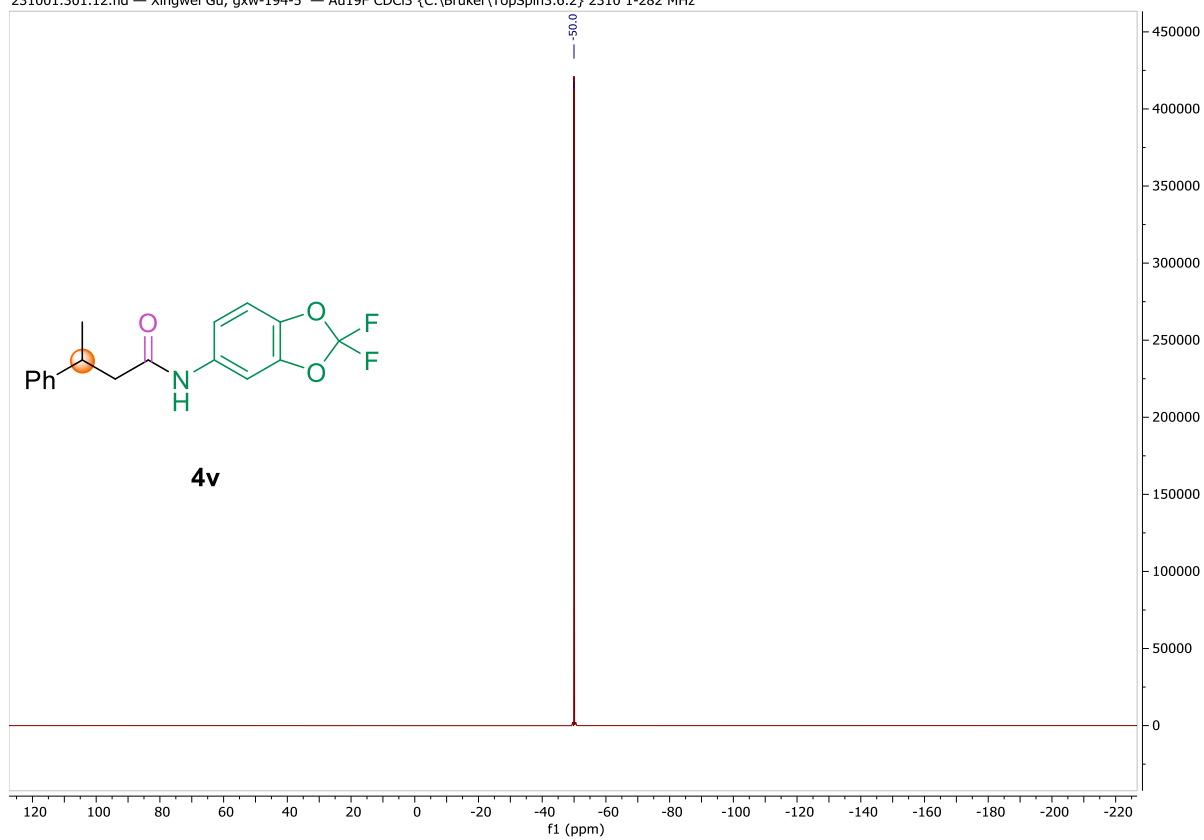



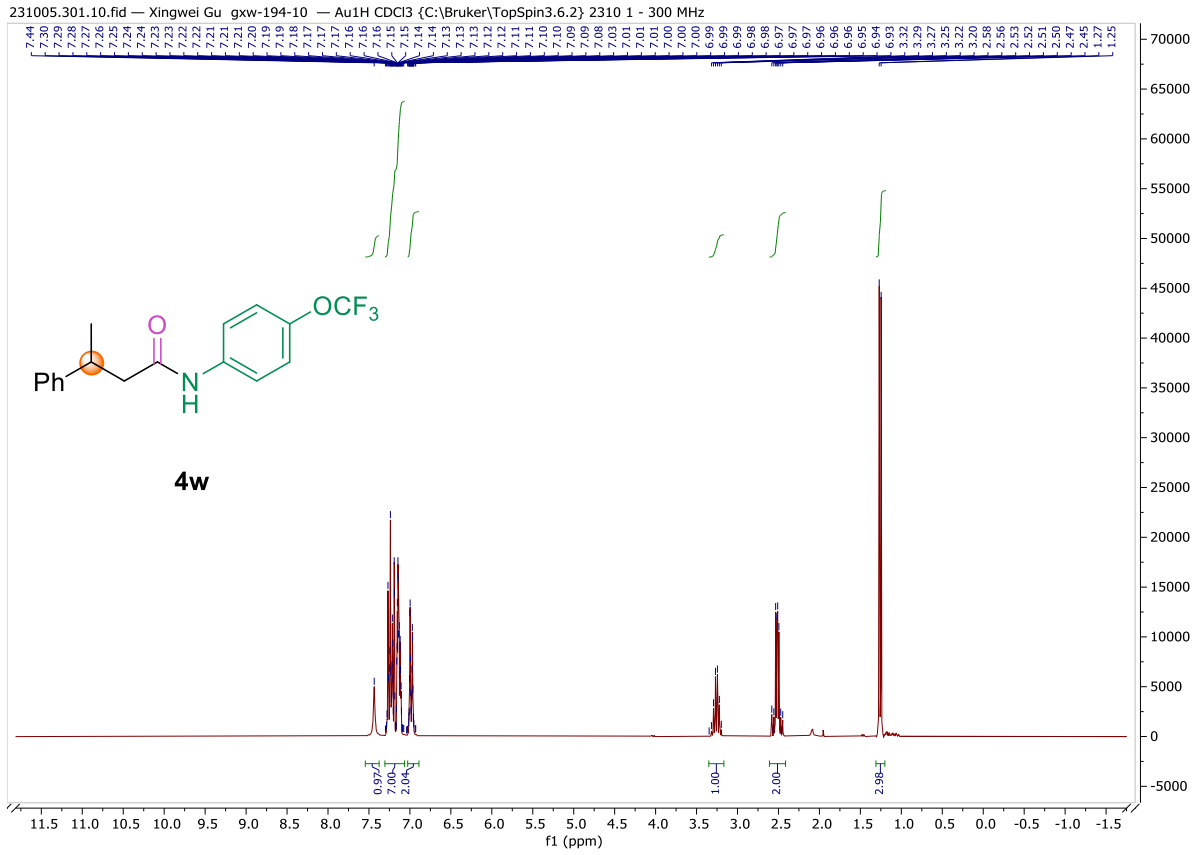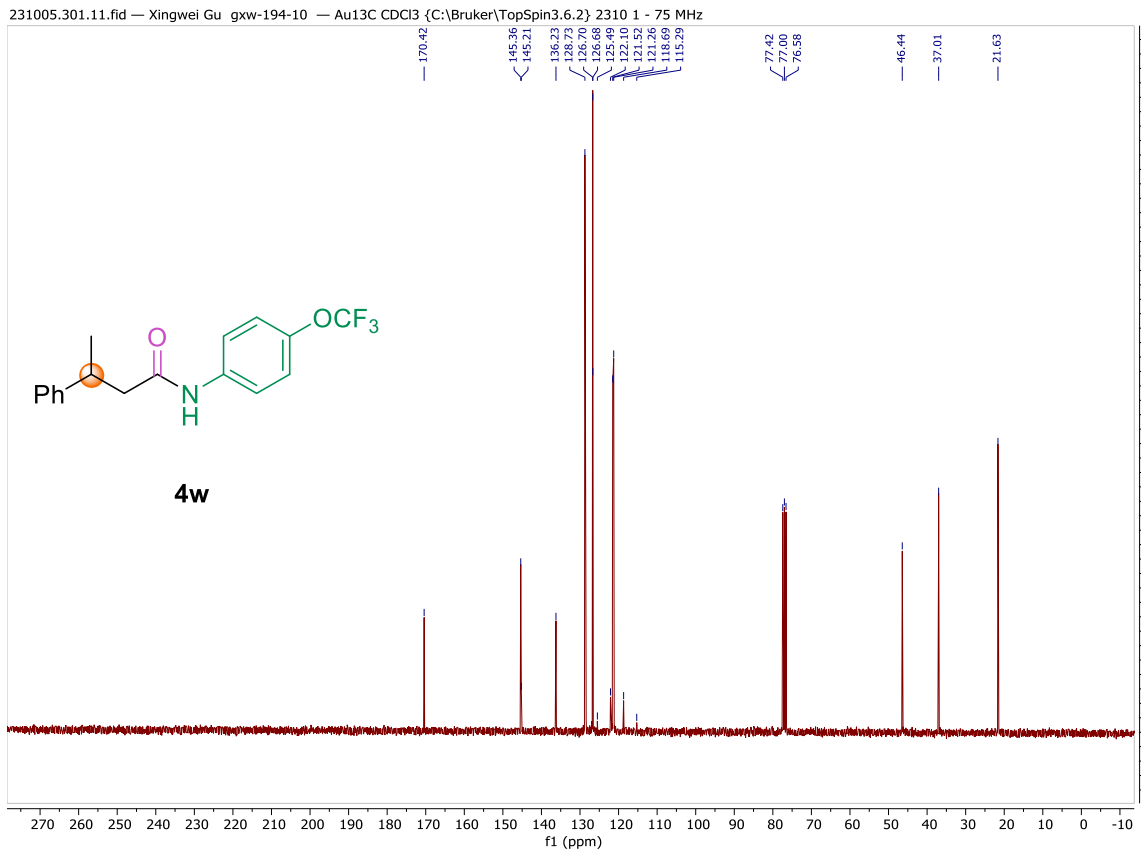

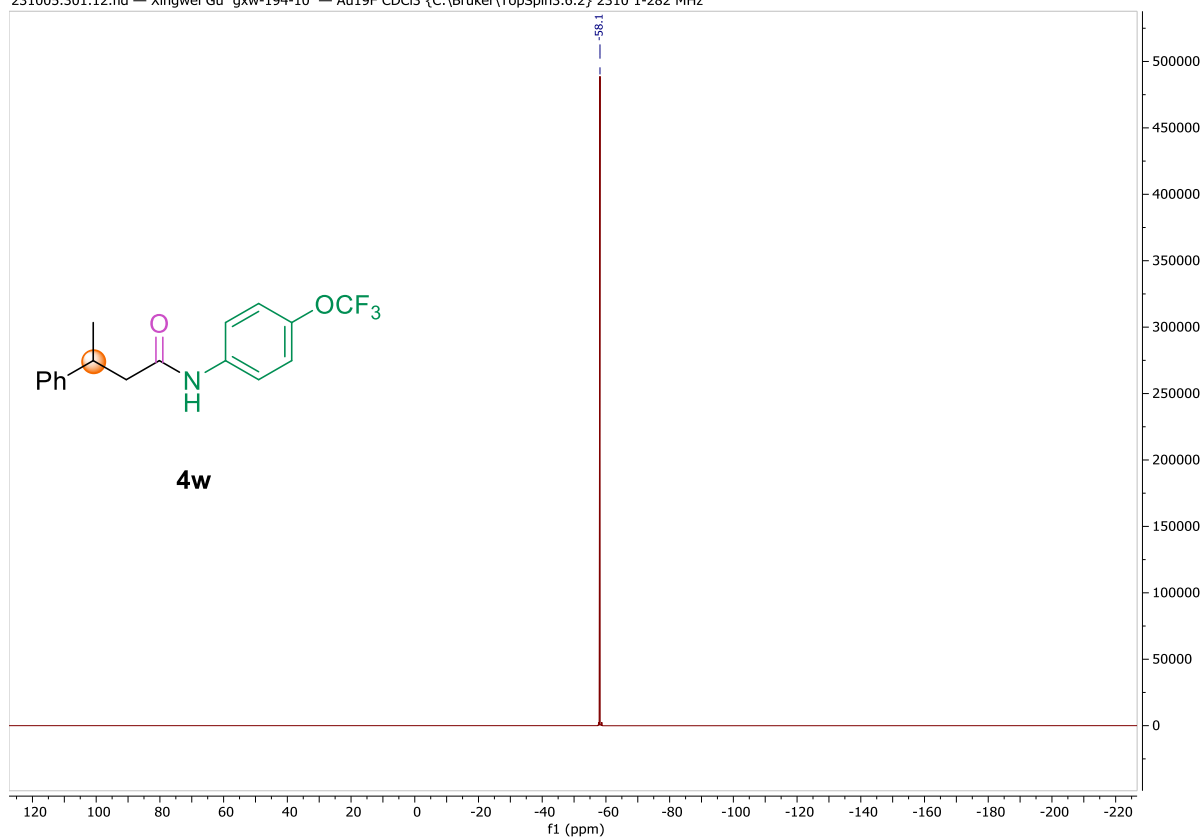

231005.303.10.fid — Xingwei Gu gxw-194-12 — Au1H CDCl3 {C:\Bruker\TopSpin3.6.2} 2310 3 - 300 MHz

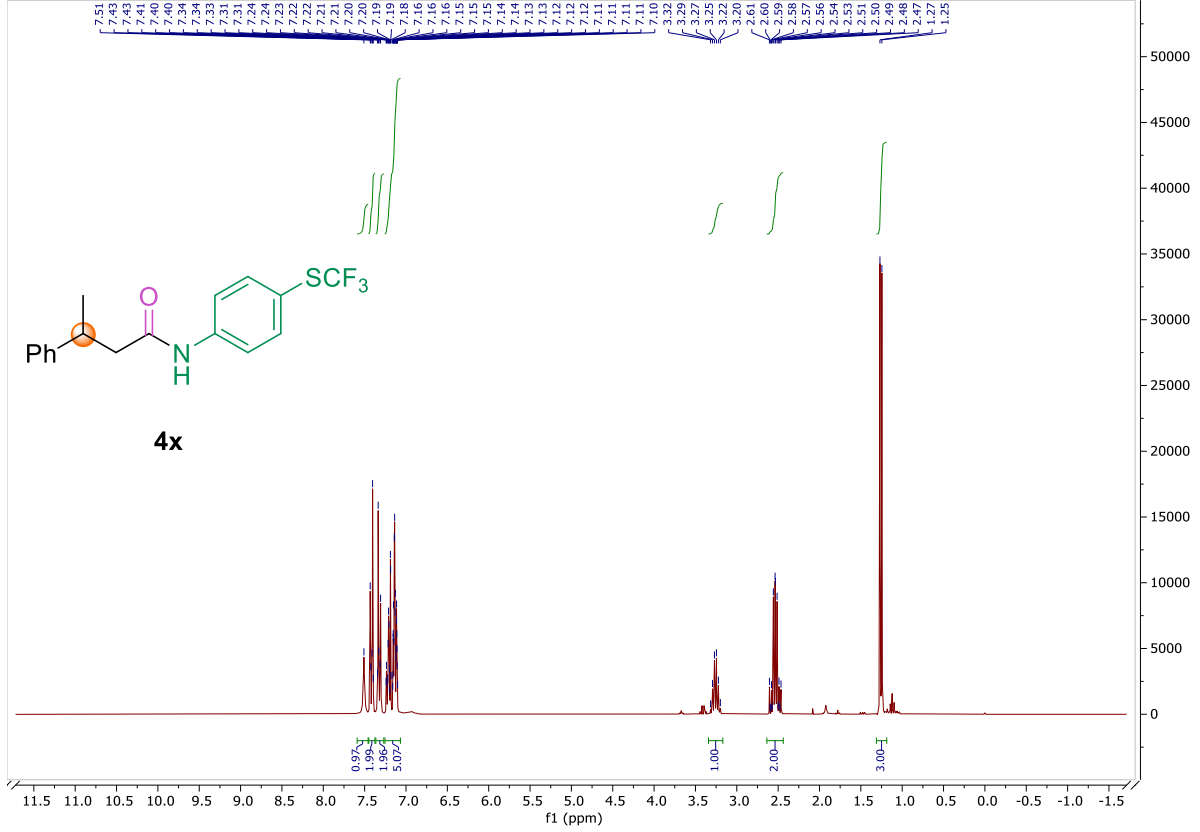

231005.303.11.fid — Xingwei Gu gxw-194-12 — Au13C CDCl3 {C:\Bruker\TopSpin3.6.2} 2310 3 - 75 MHz

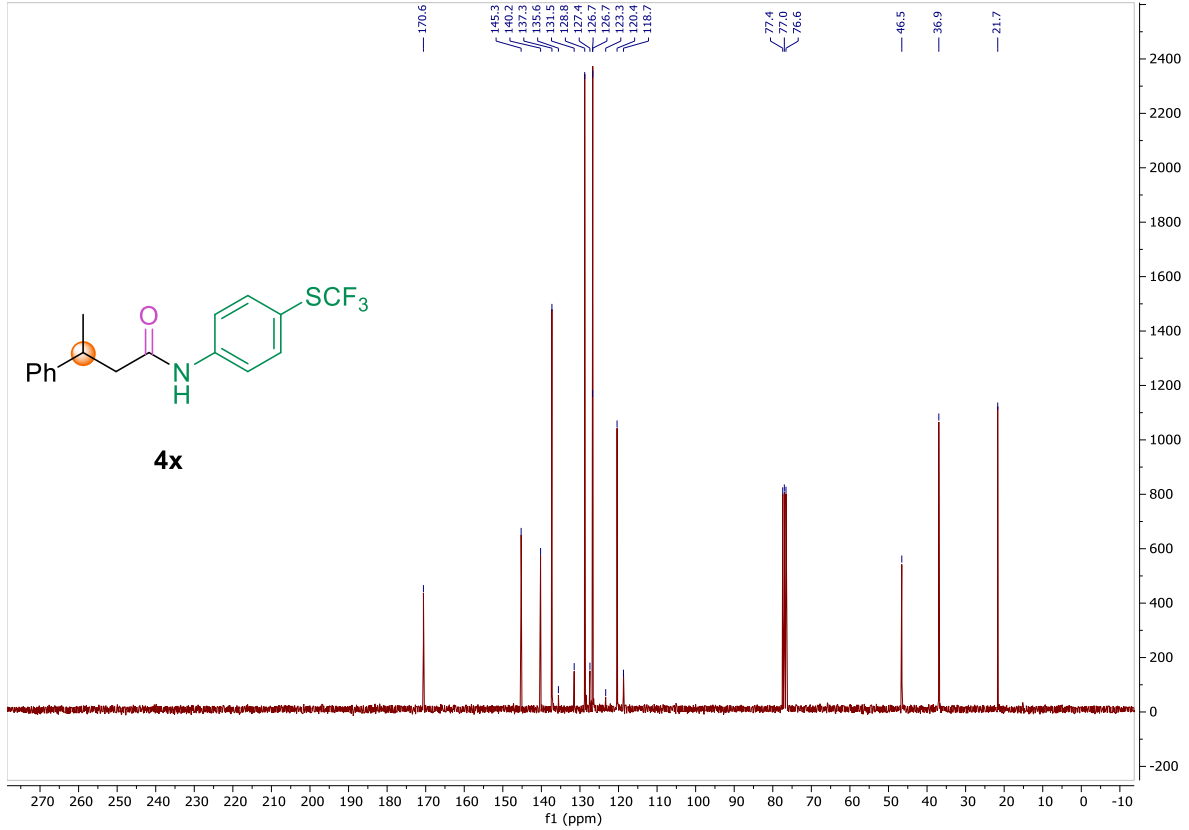

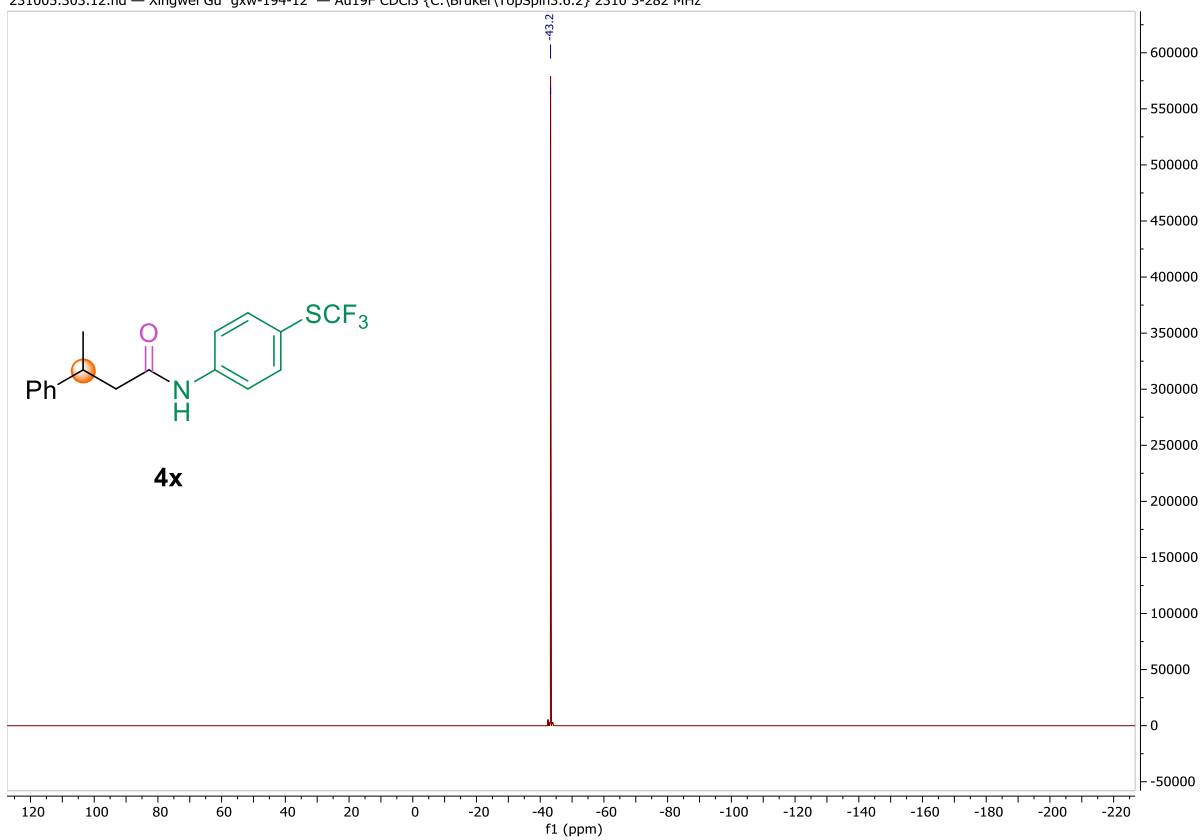

231005.302.10.fid — Xingwei Gu gxw-194-11 — Au1H CDCl3 {C:\Bruker\TopSpin3.6.2} 2310 2 - 300 MHz

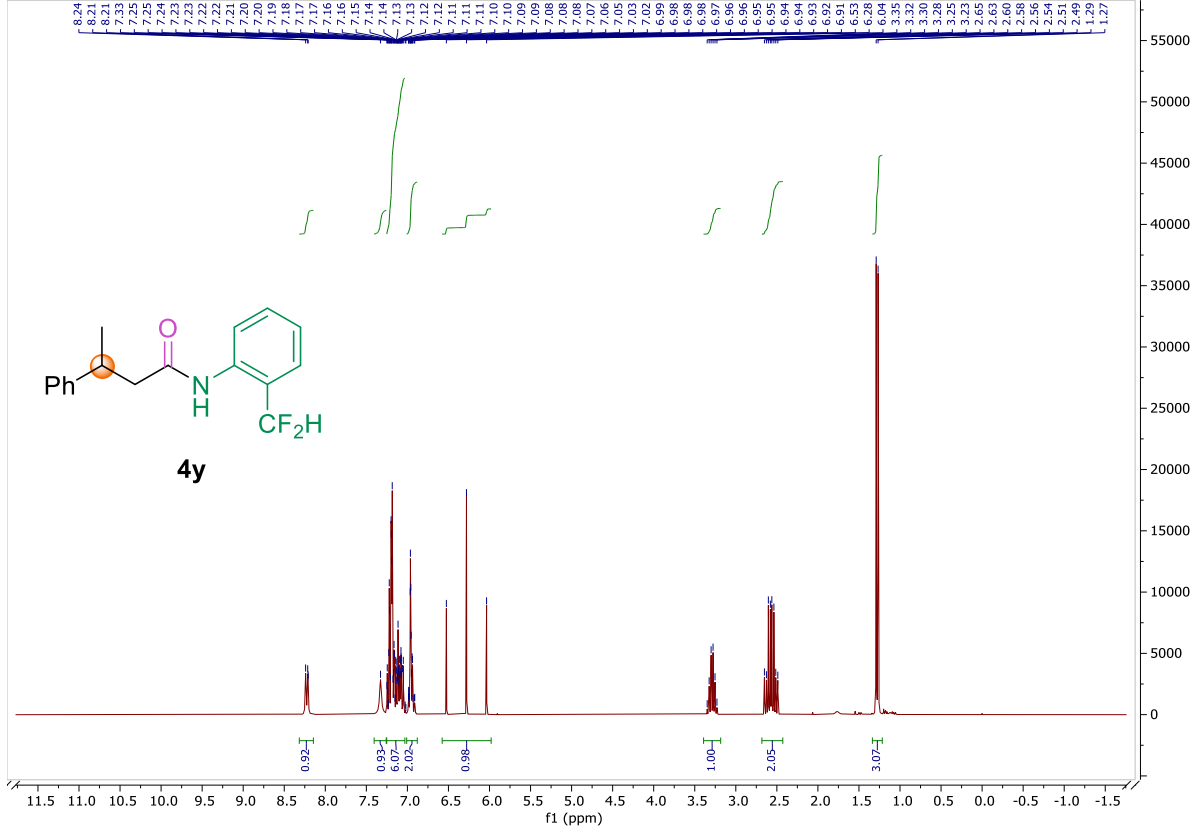

231005.302.11.fid — Xingwei Gu gxw-194-11 — Au13C CDCl3 {C:\Bruker\TopSpin3.6.2} 2310 2 - 75 MHz

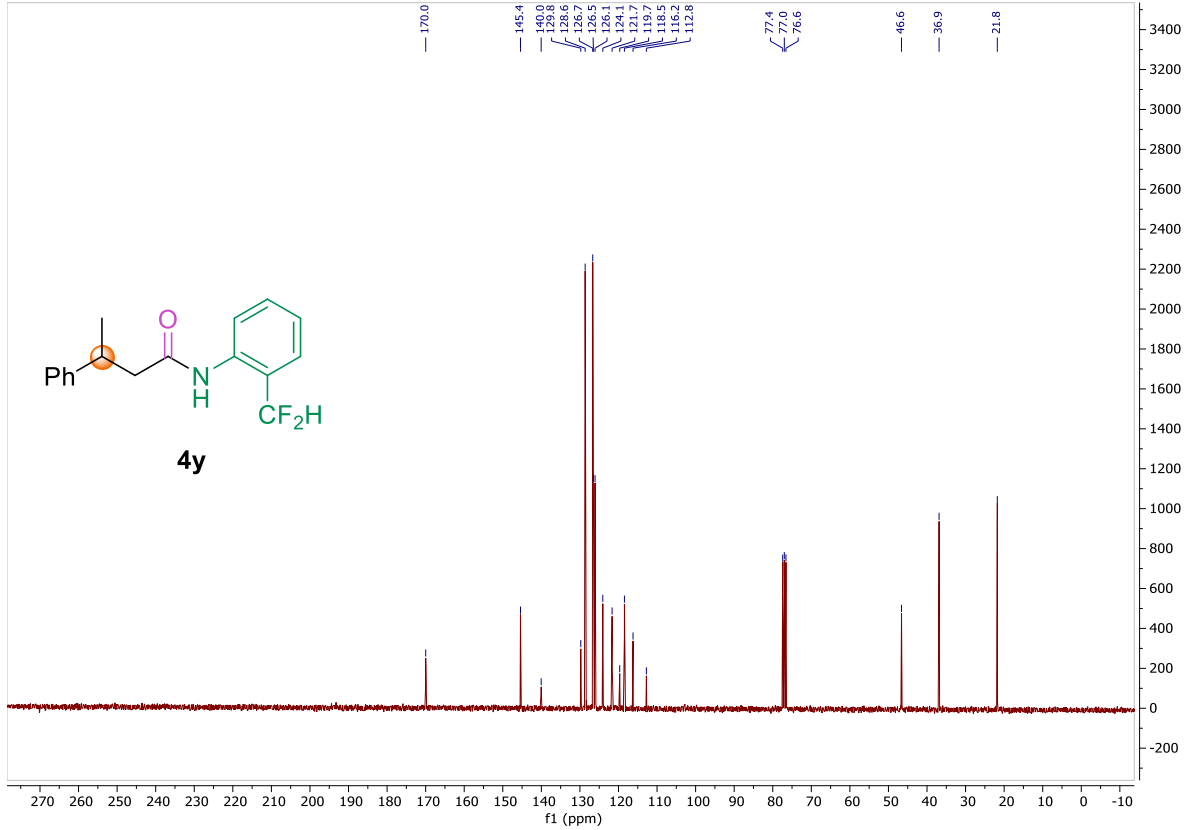

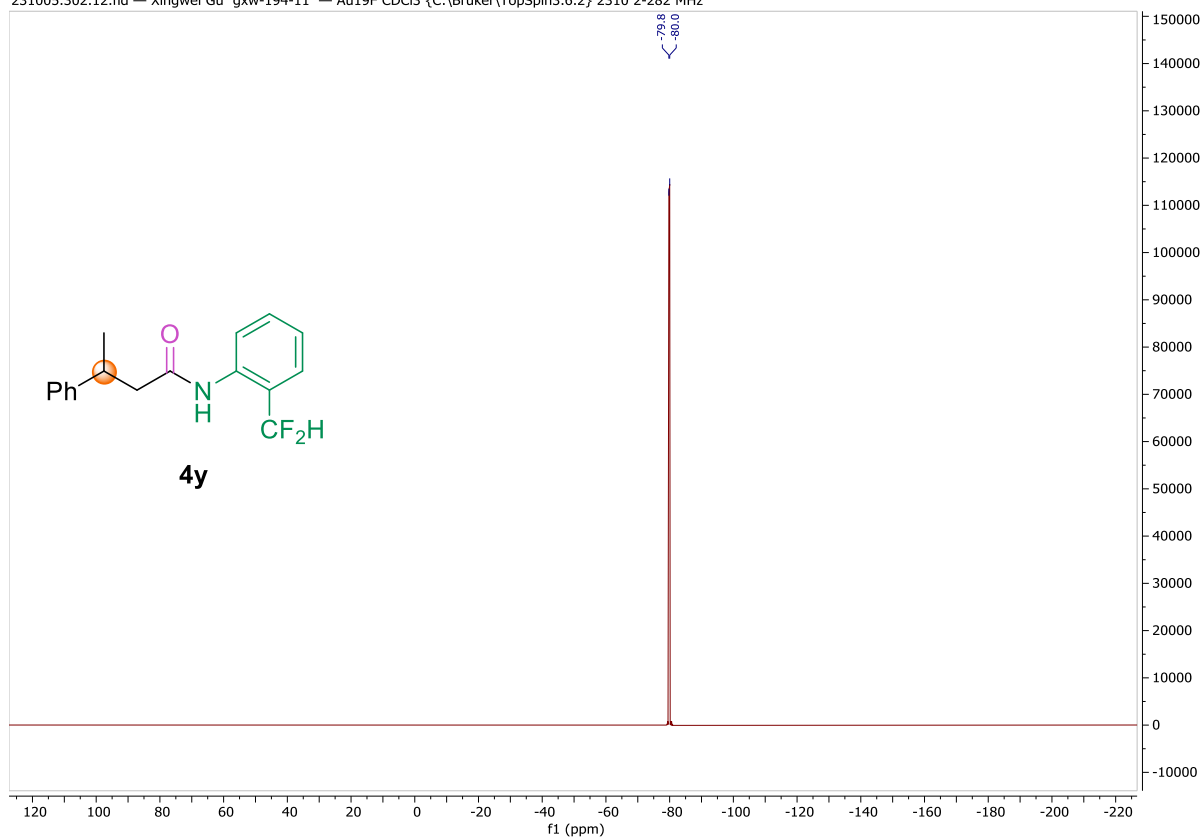

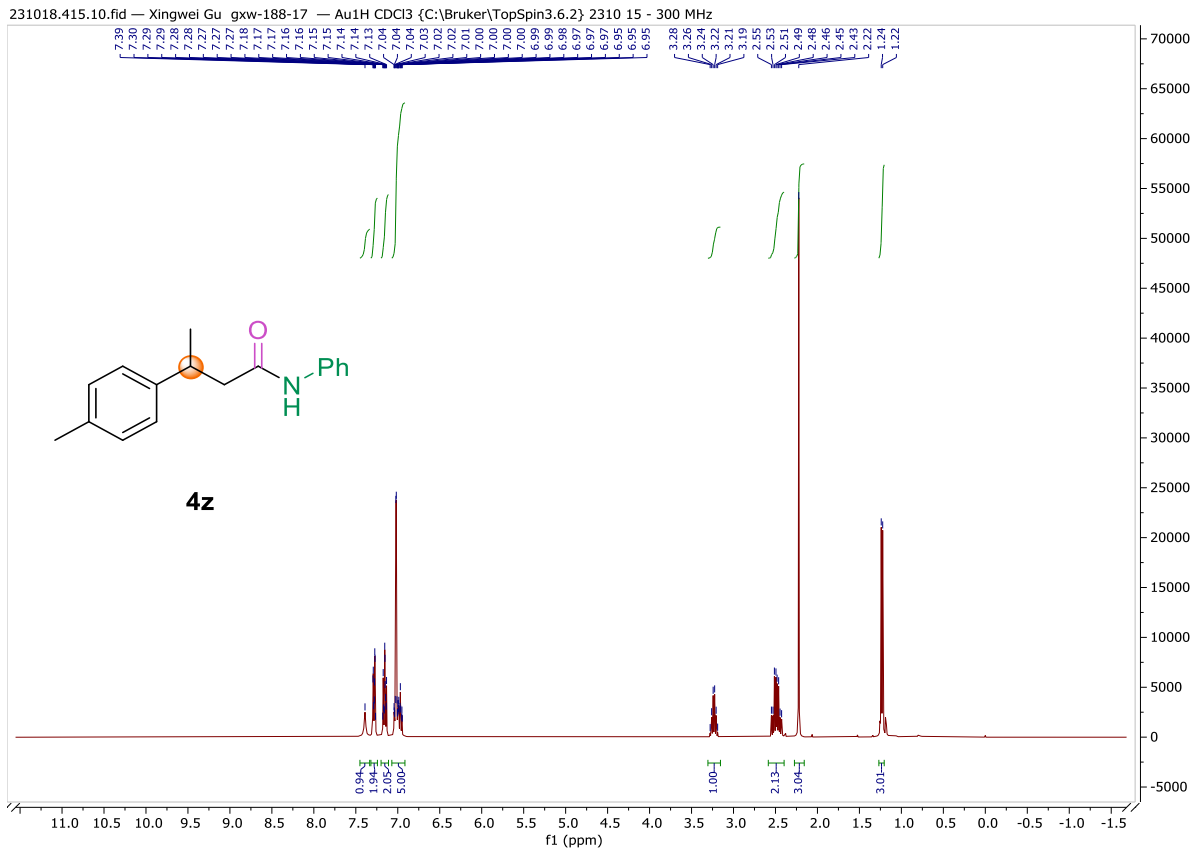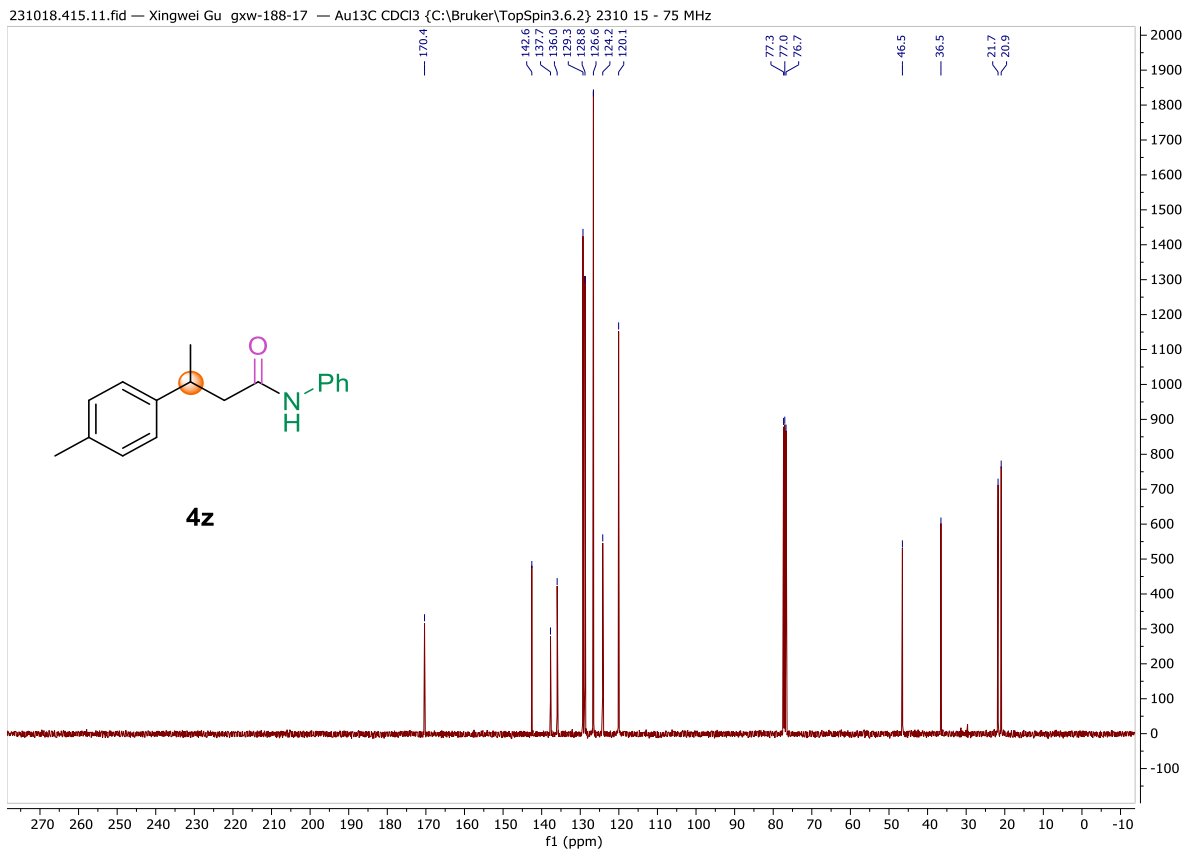

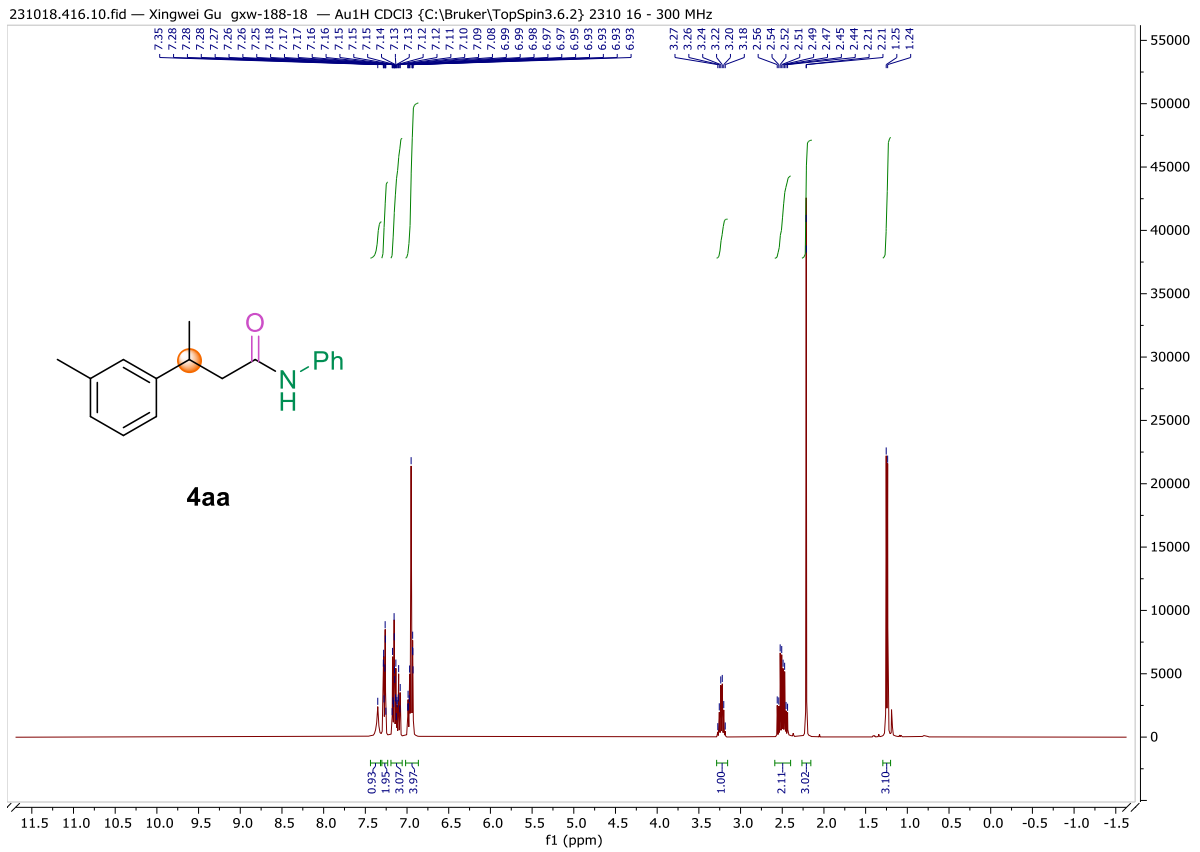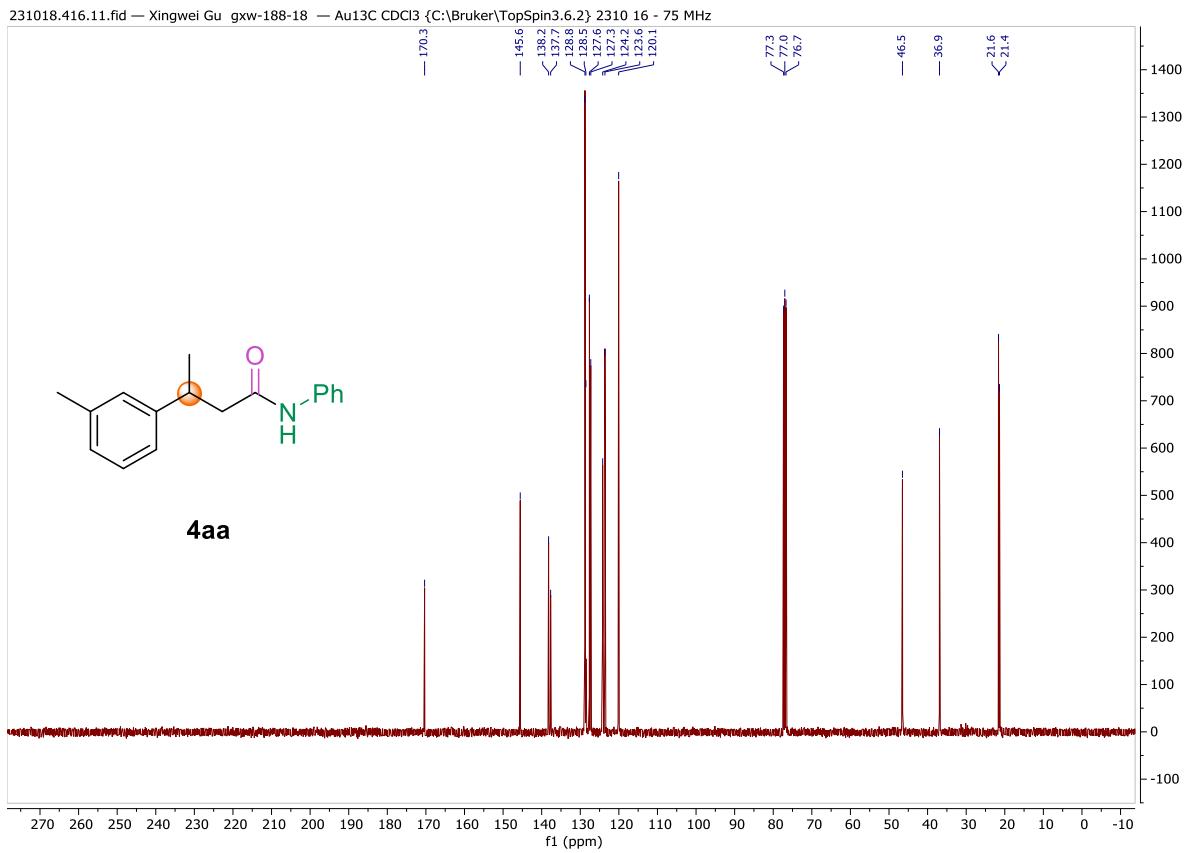



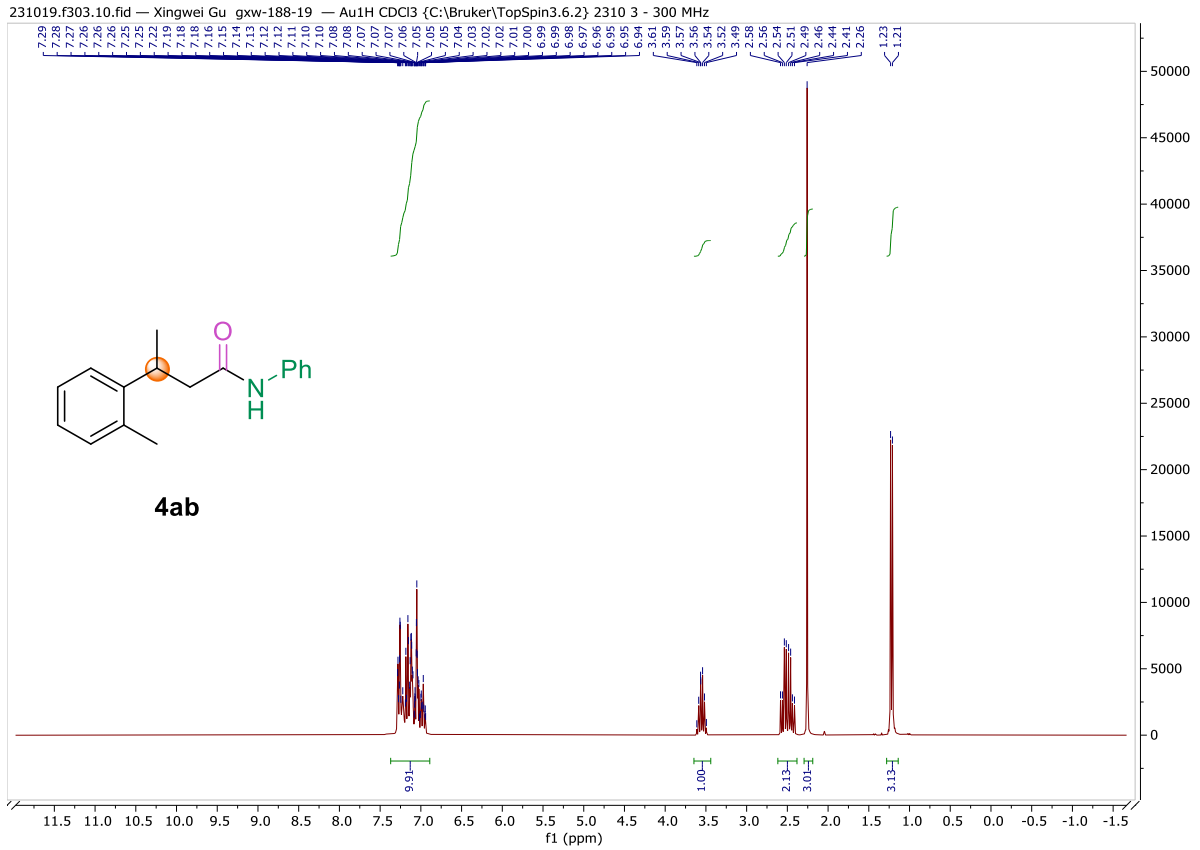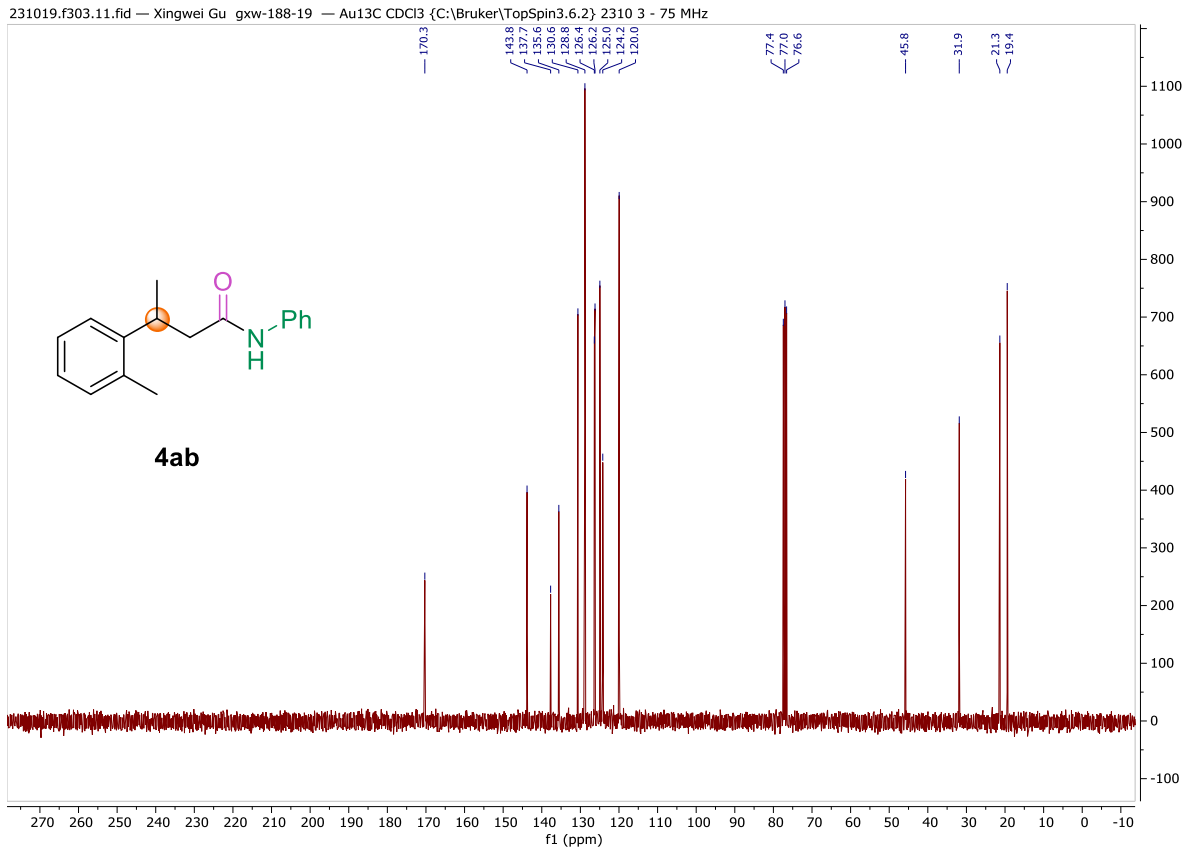

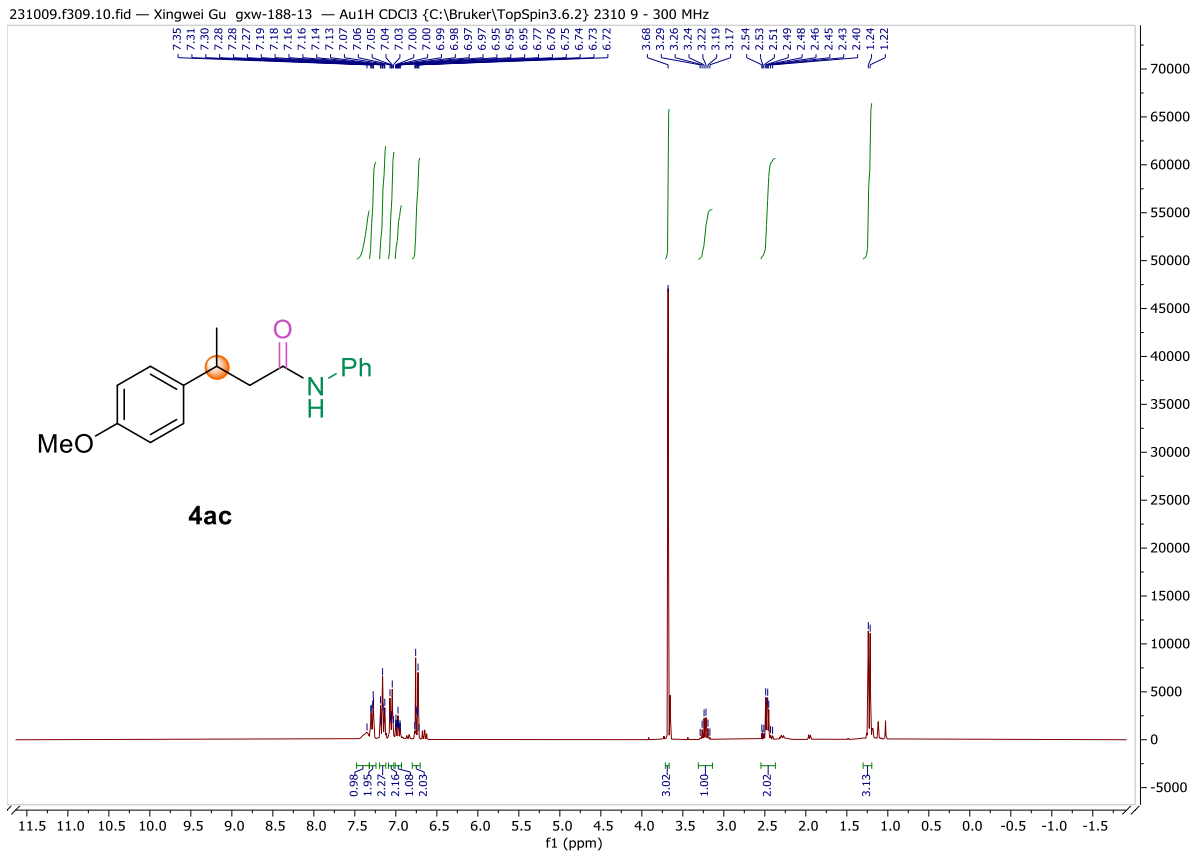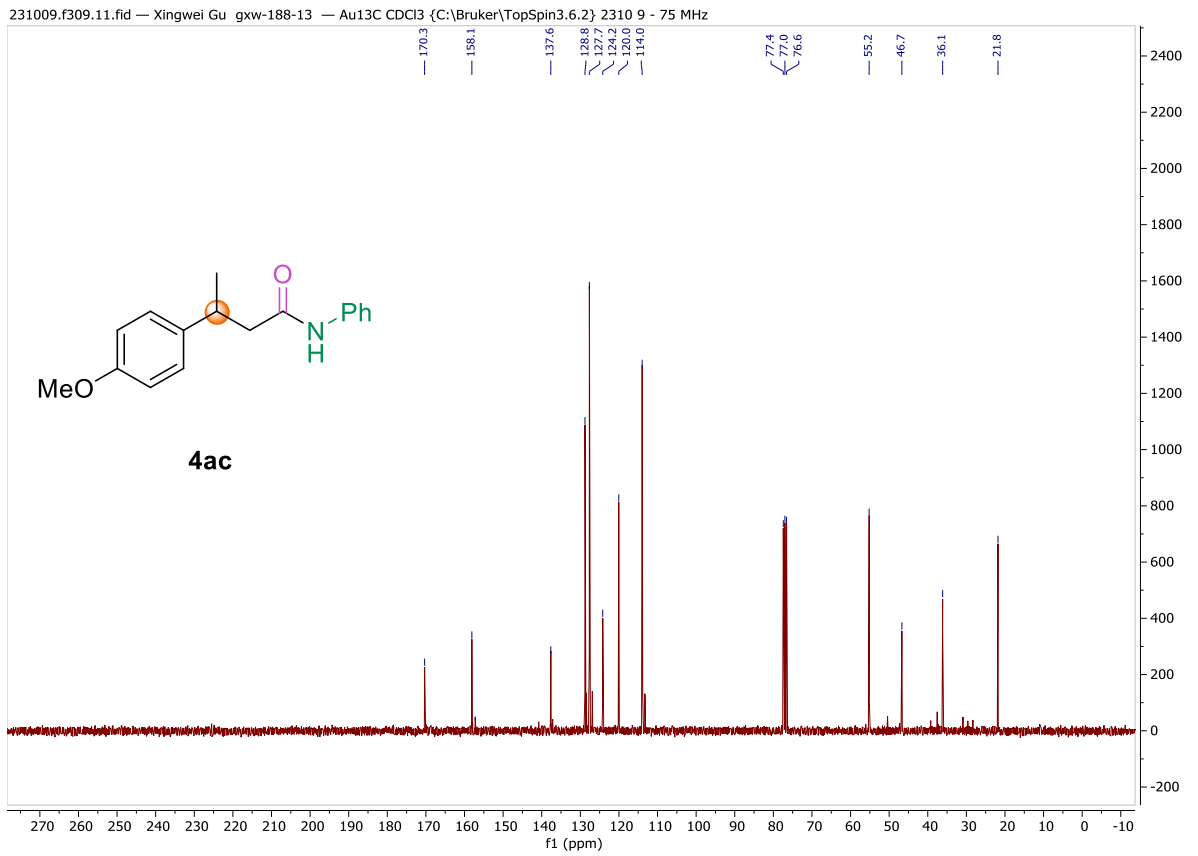

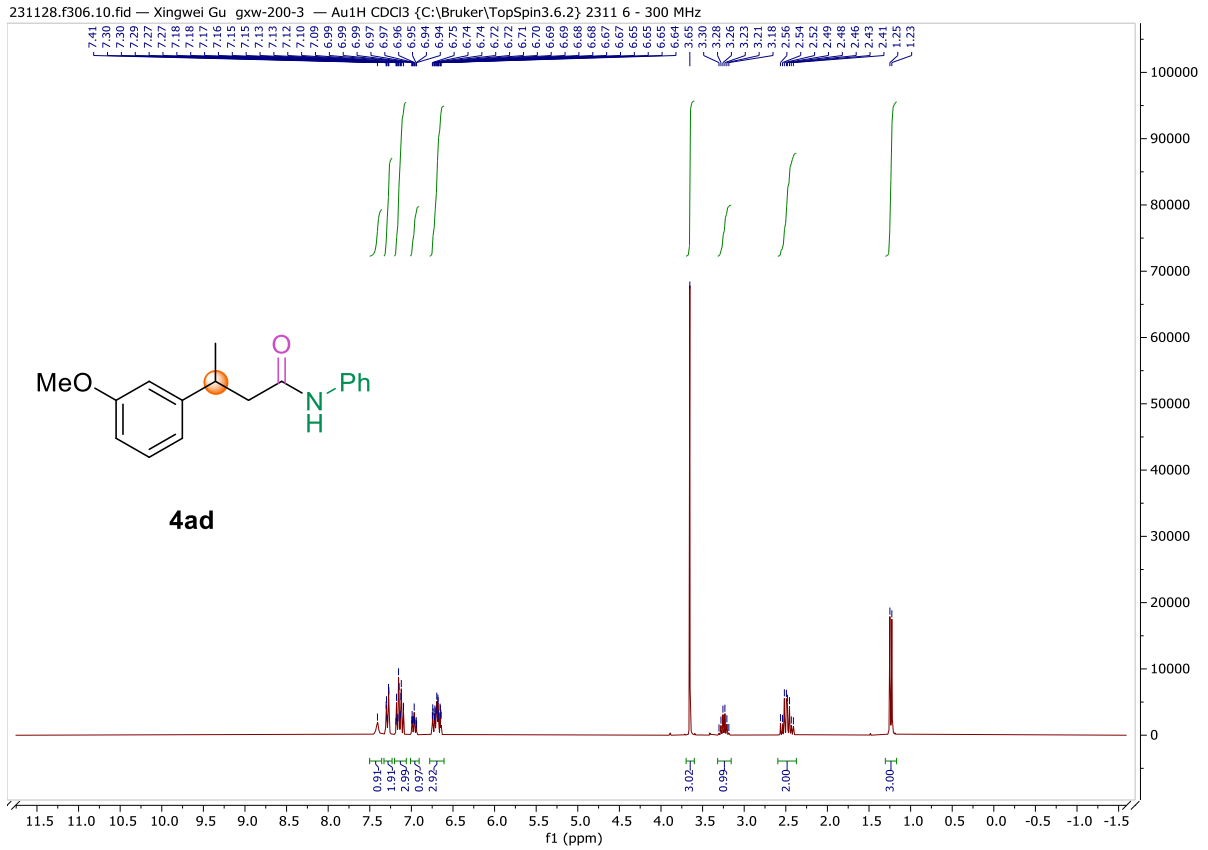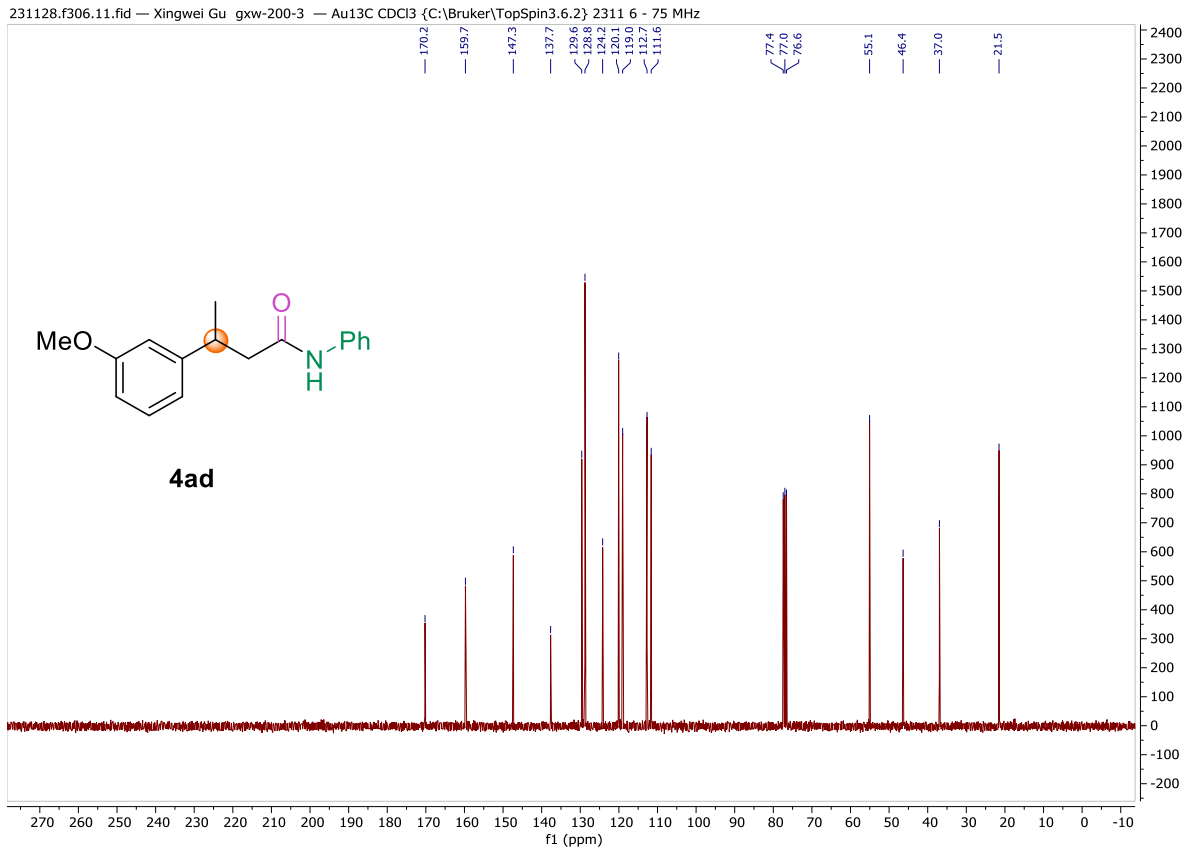

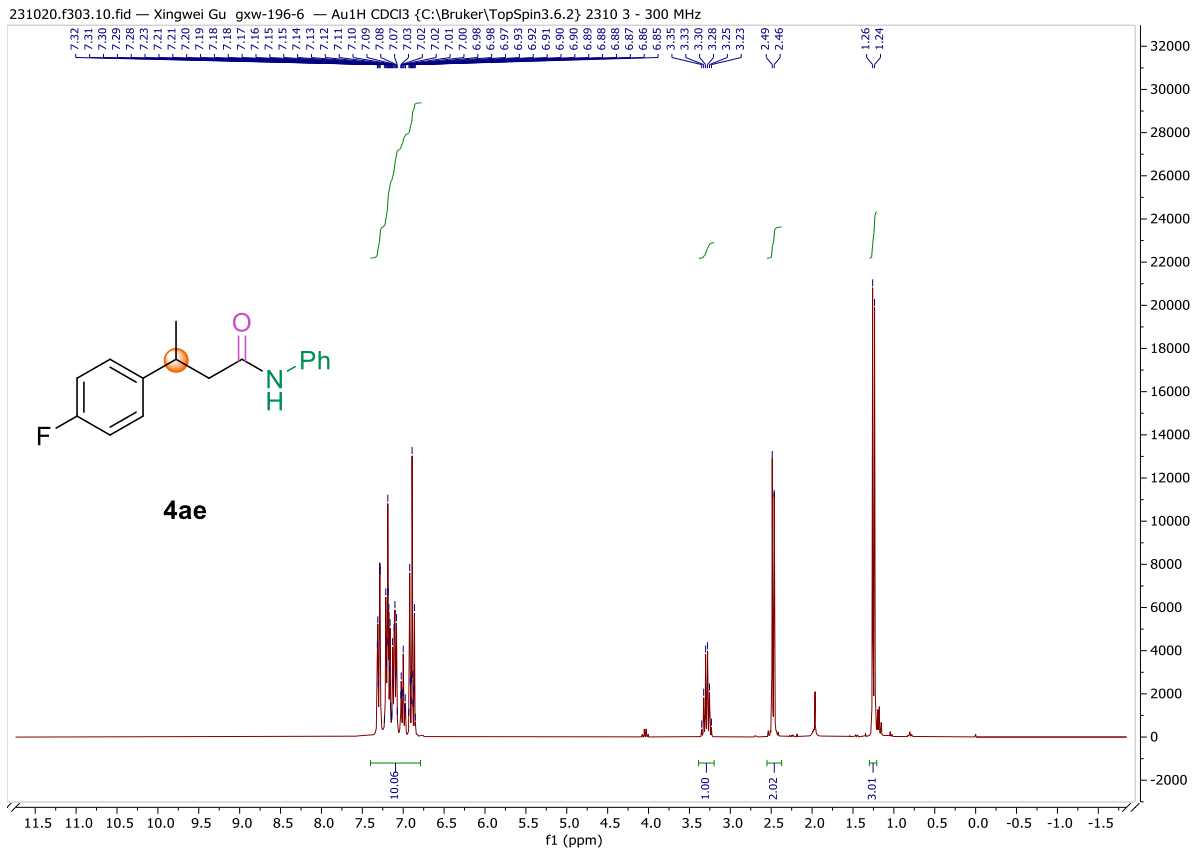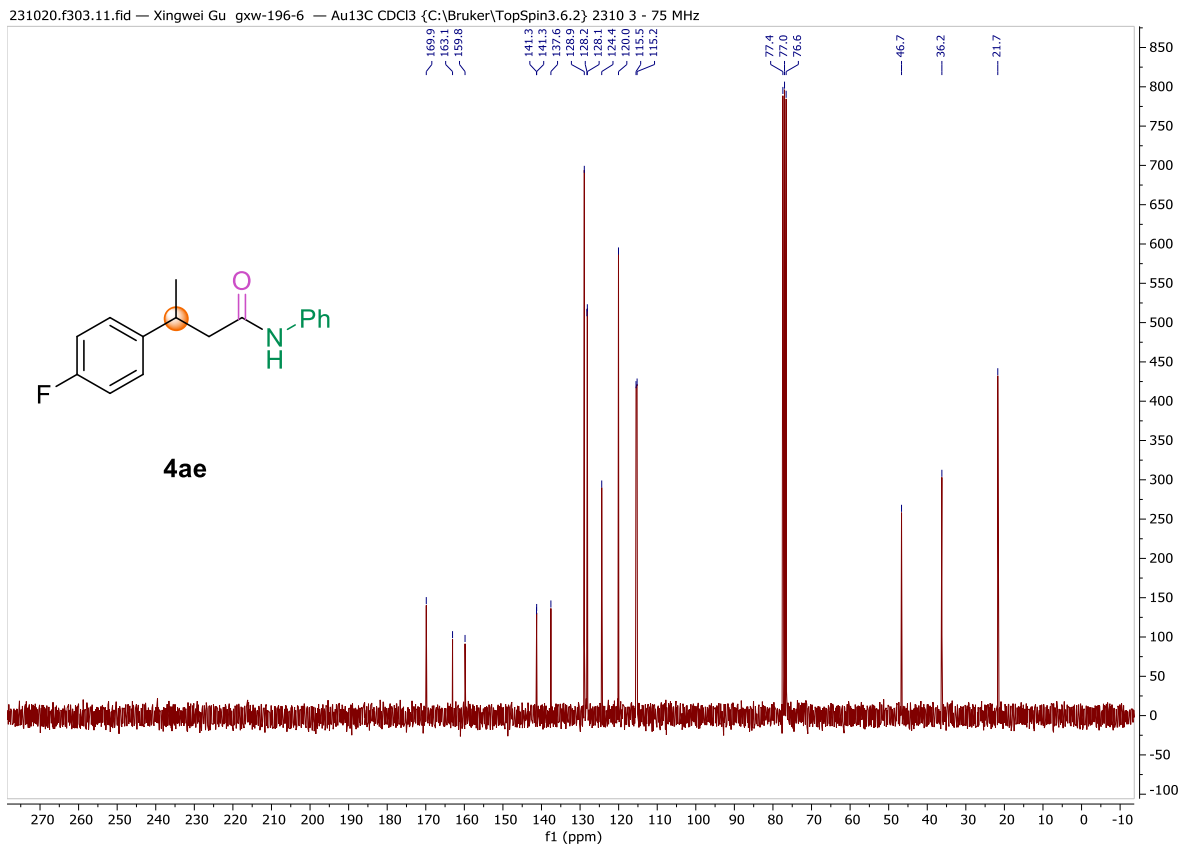

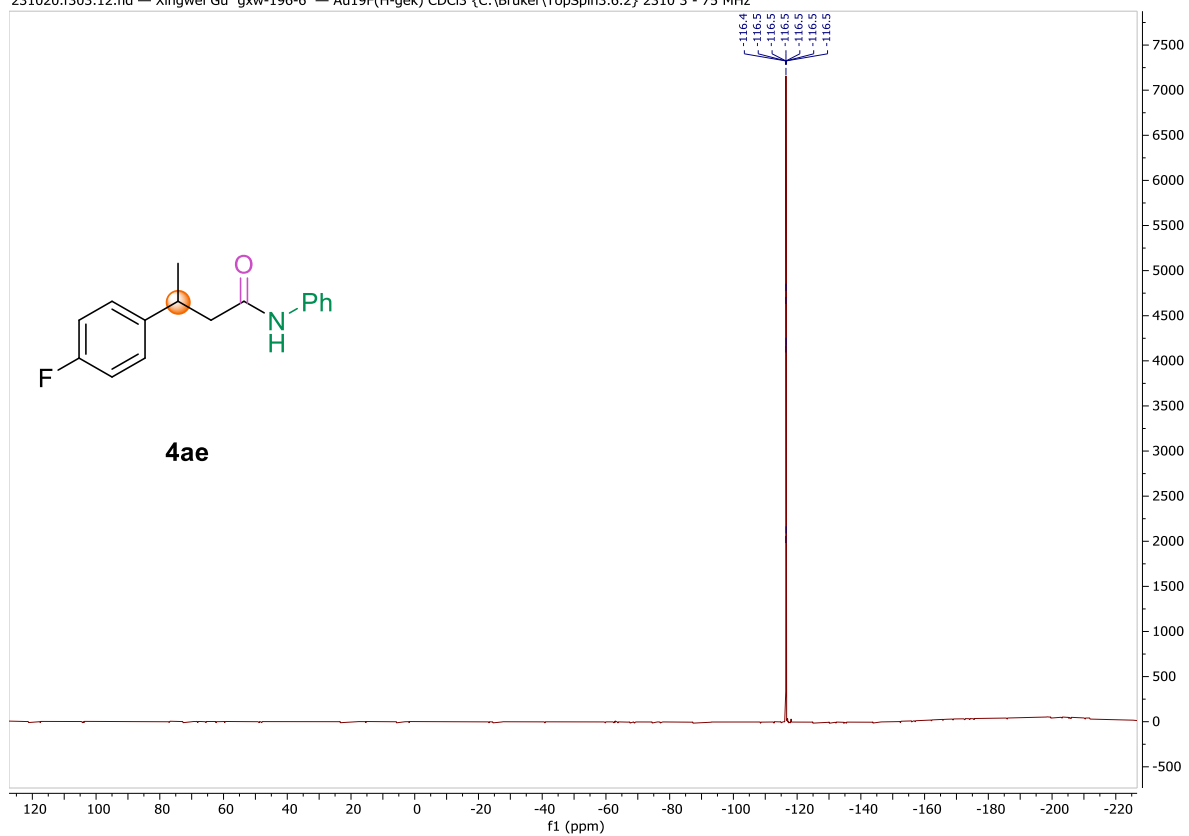

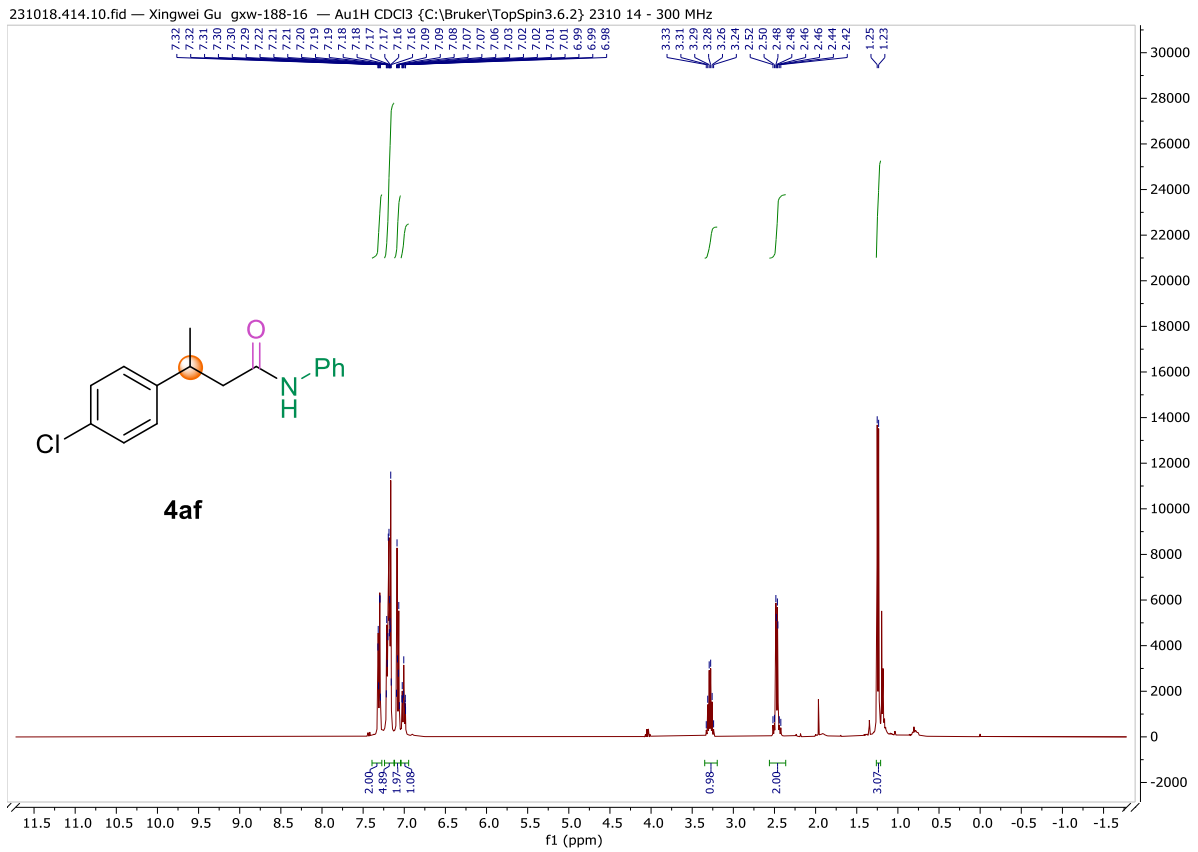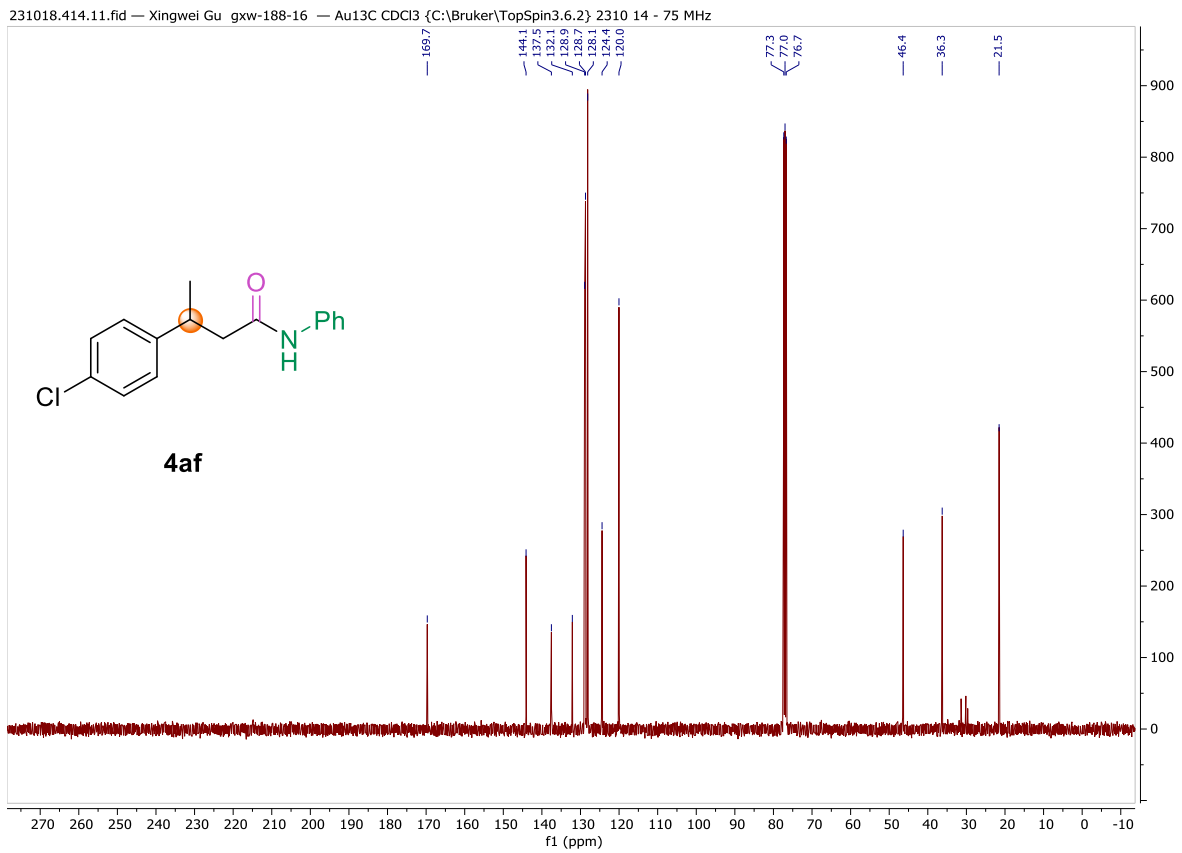

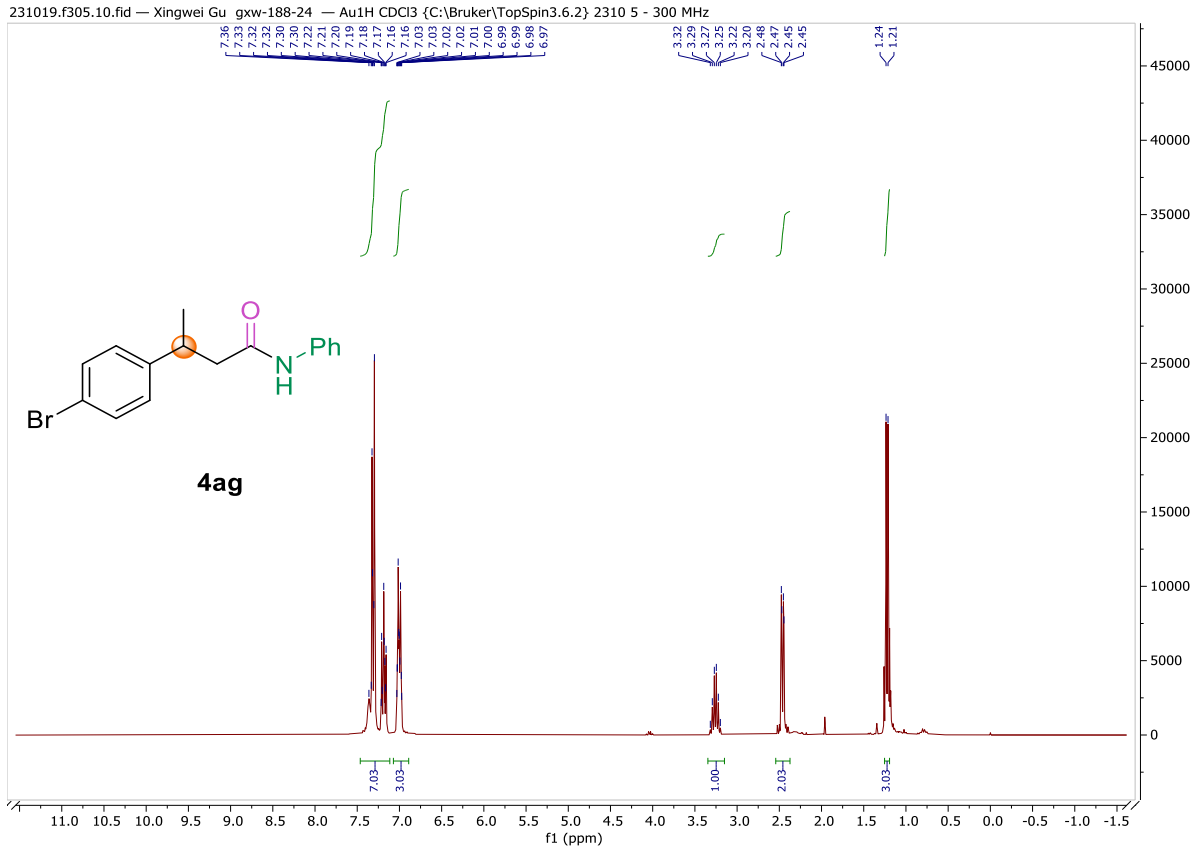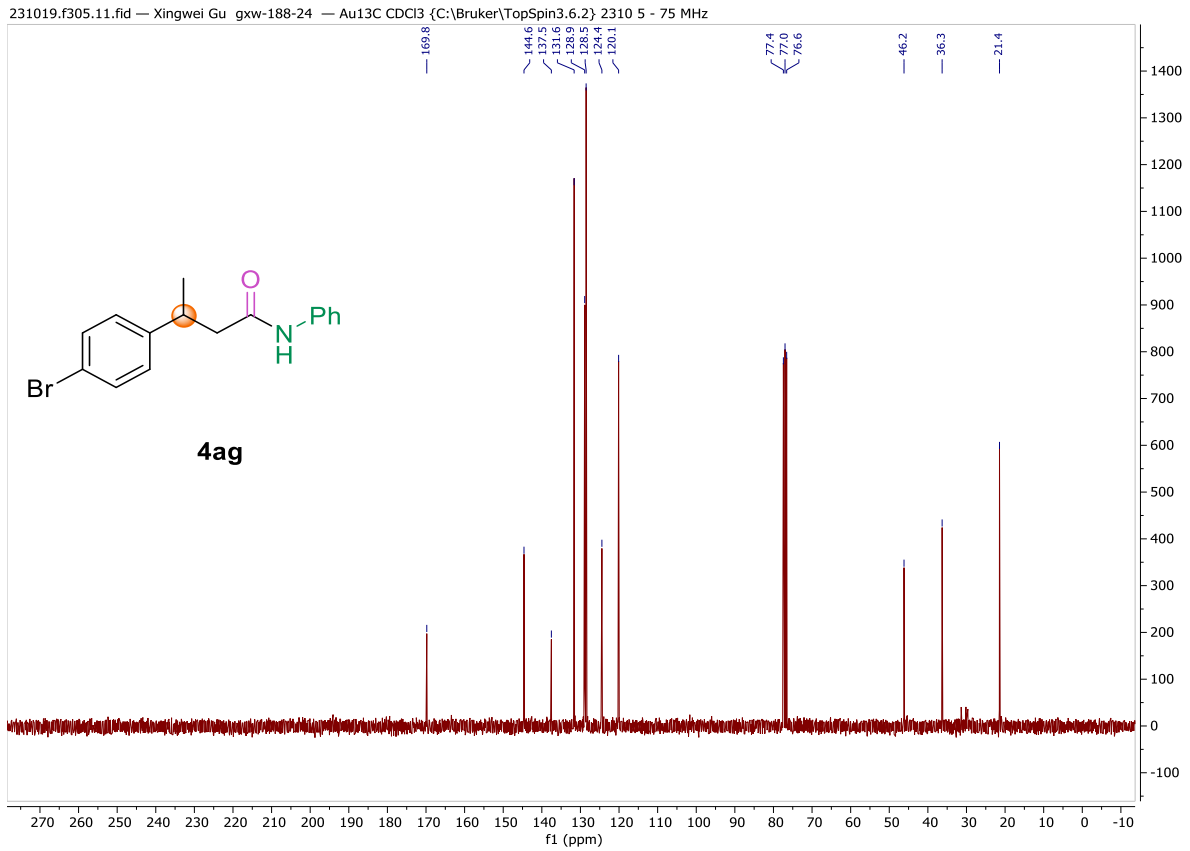

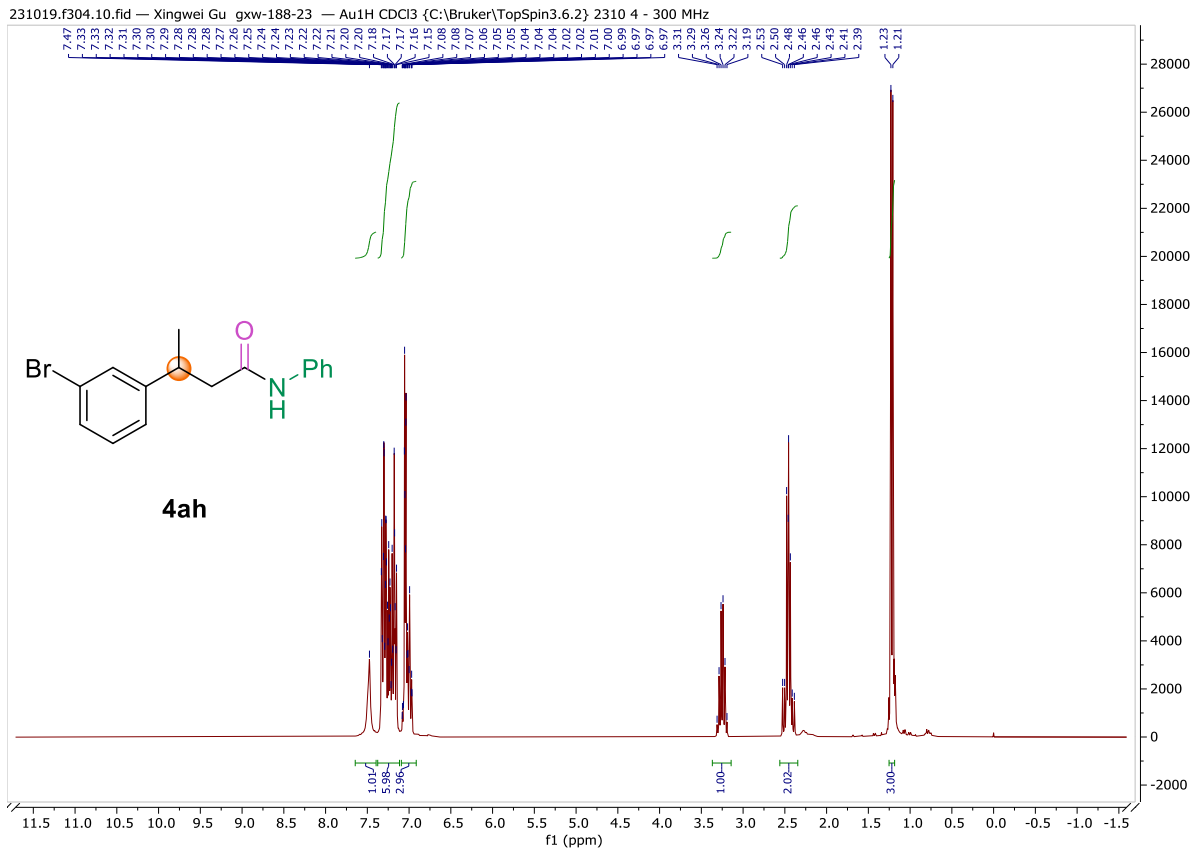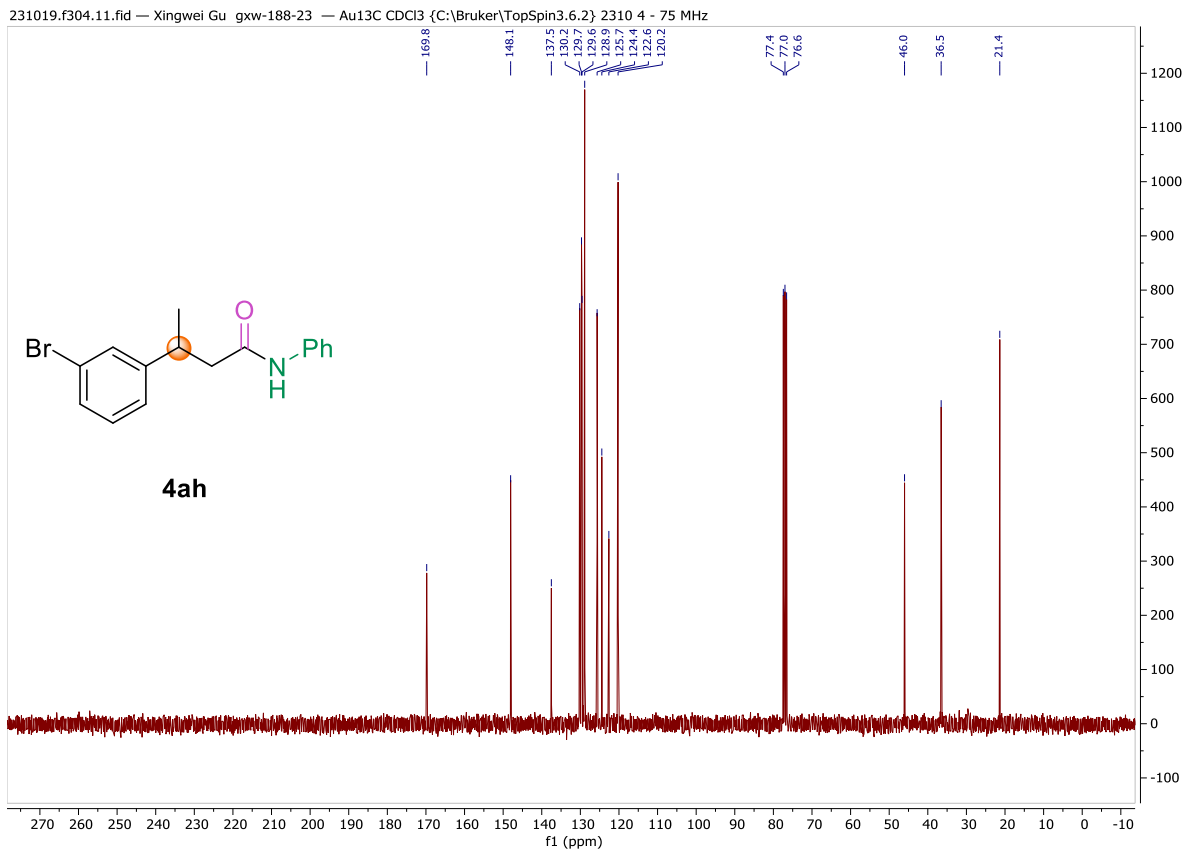



231020.f301.10.fid — Xingwei Gu gxw-196-4 — Au1H CDCl3 {C:\Bruker\TopSpin3.6.2} 2310 1 - 300 MHz

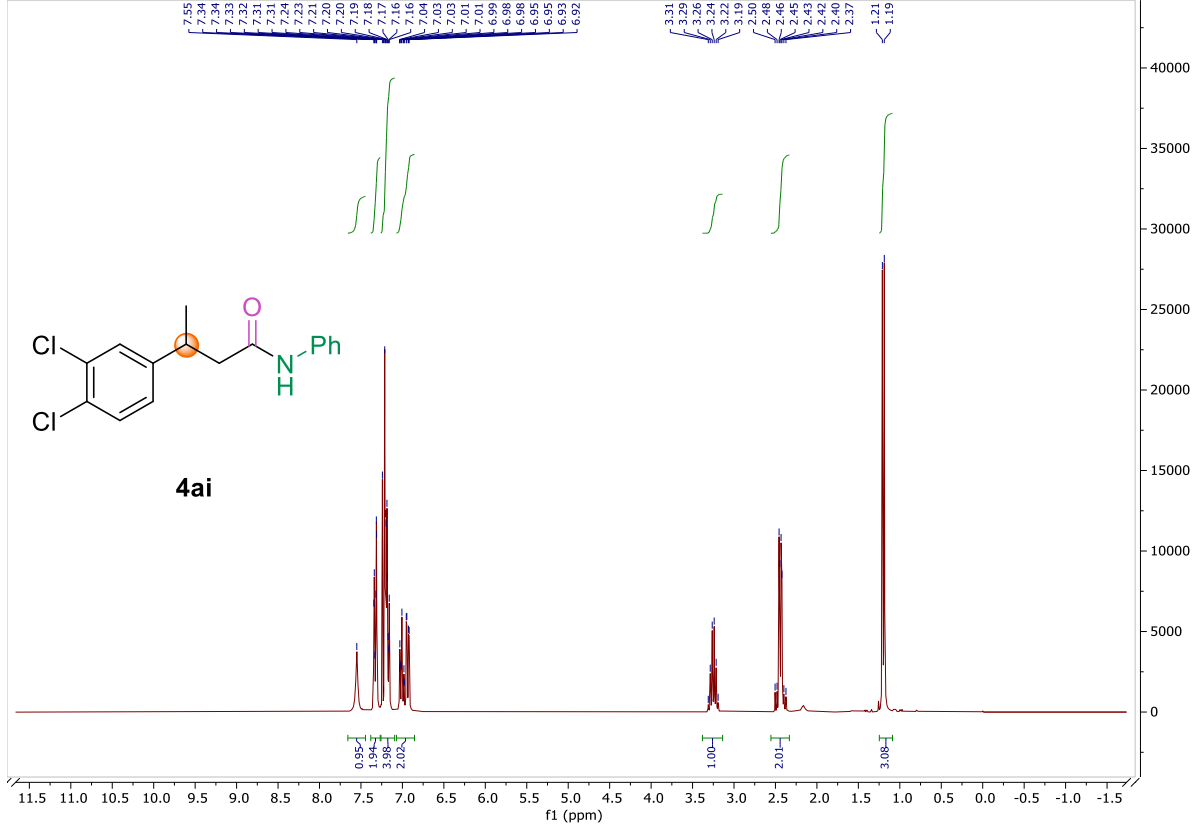

231020.f301.11.fid — Xingwei Gu gxw-196-4 — Au13C CDCl3 {C:\Bruker\TopSpin3.6.2} 2310 1 - 75 MHz

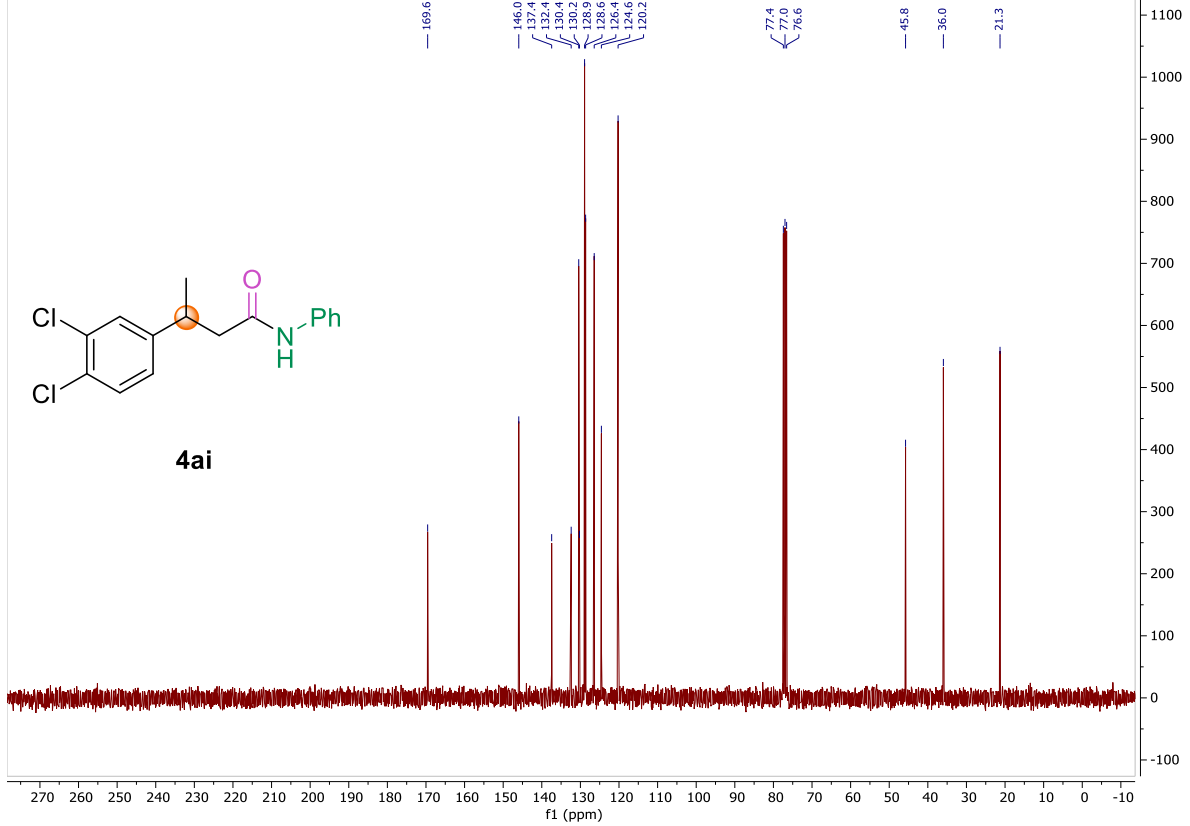

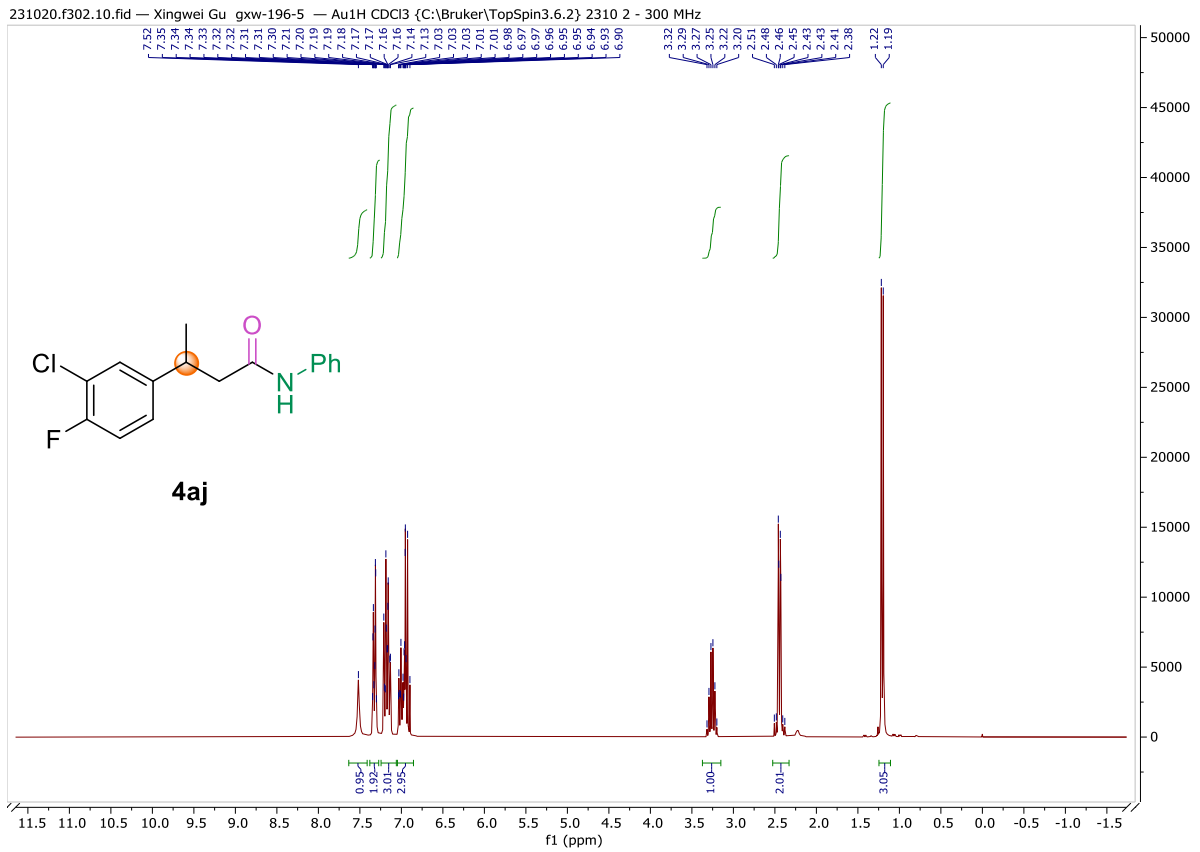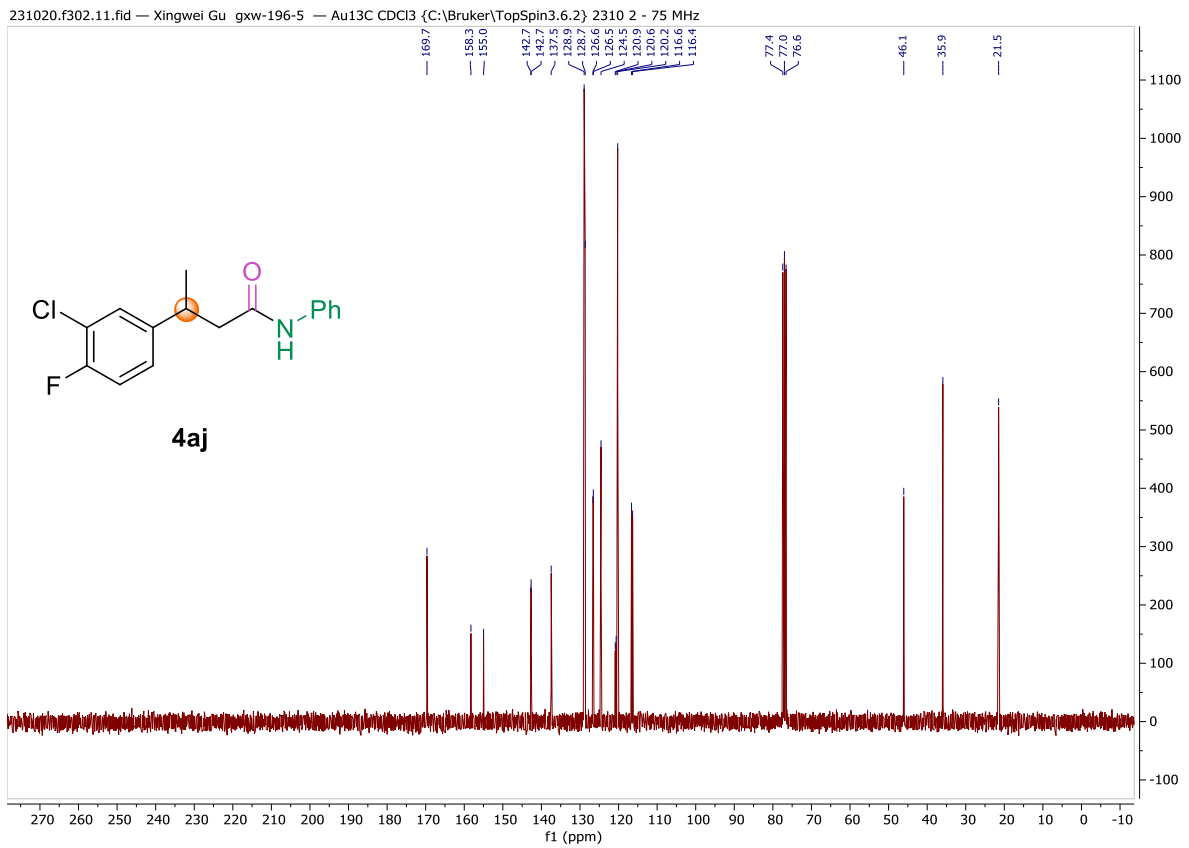

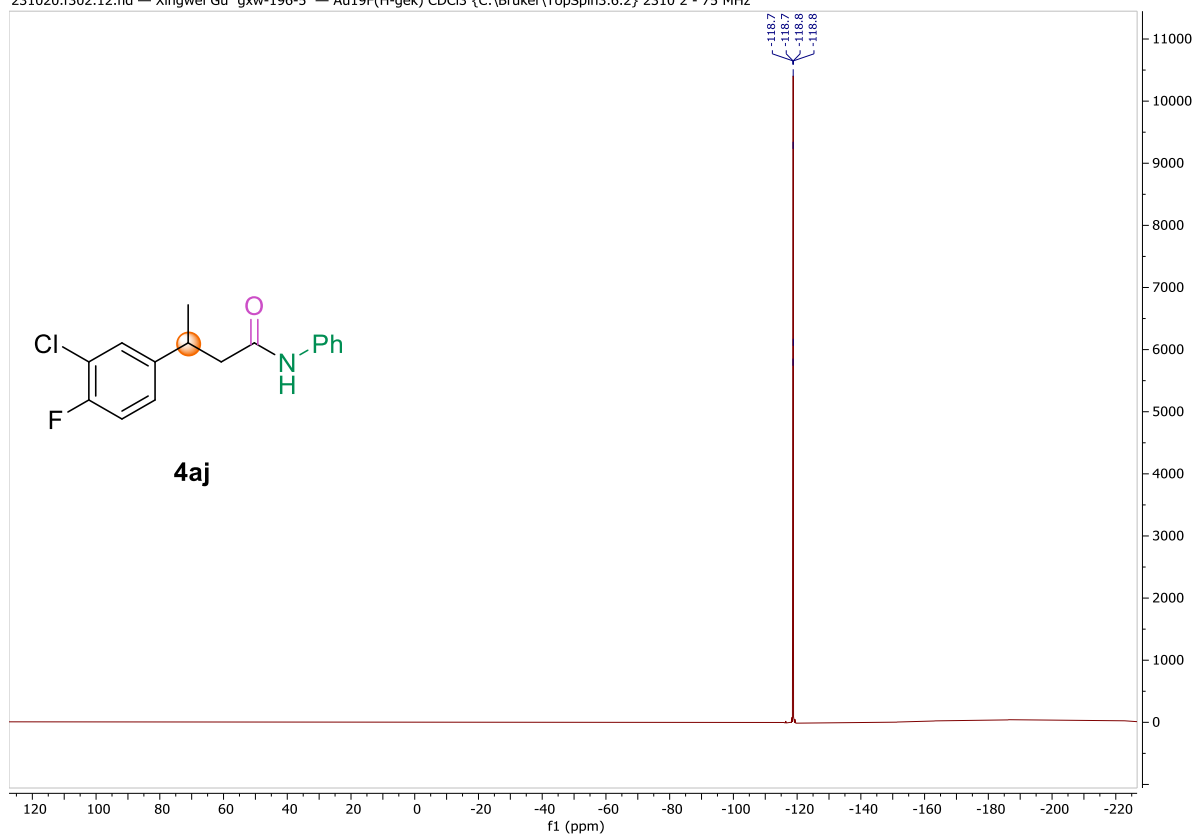

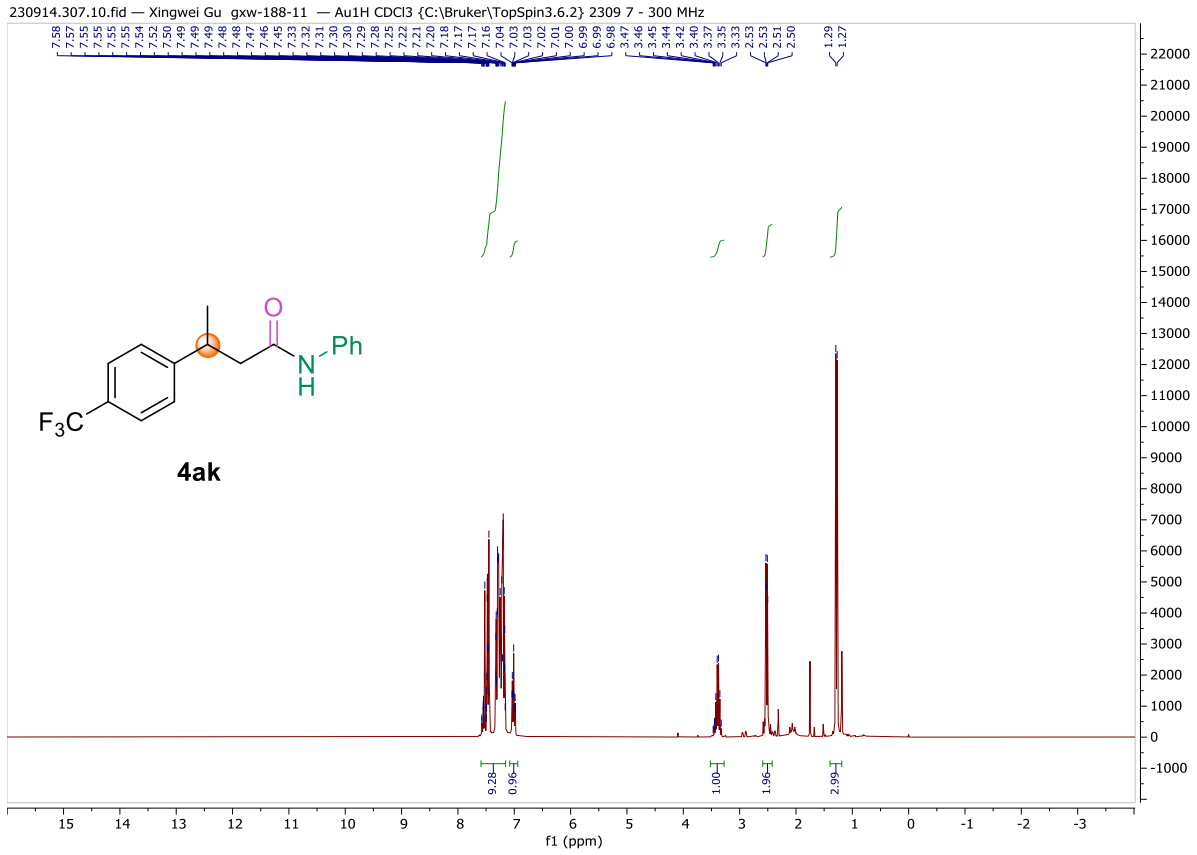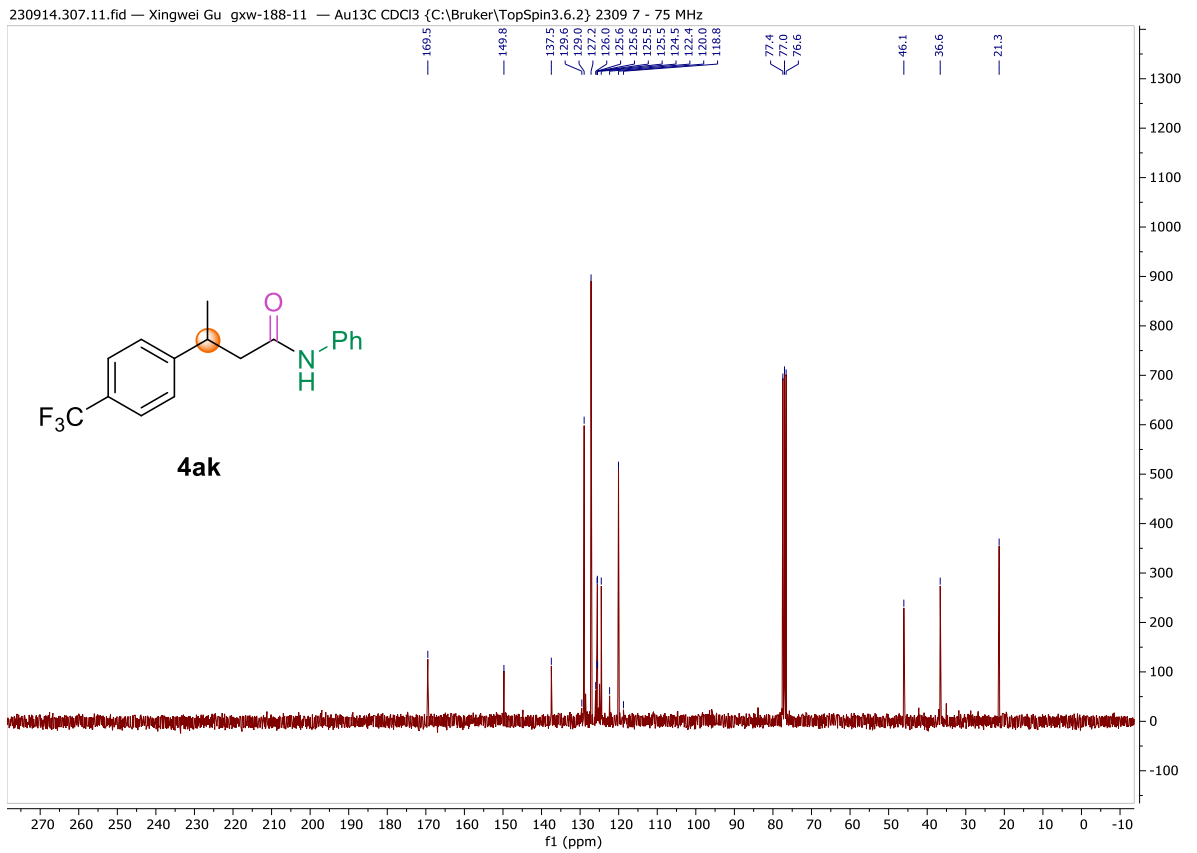

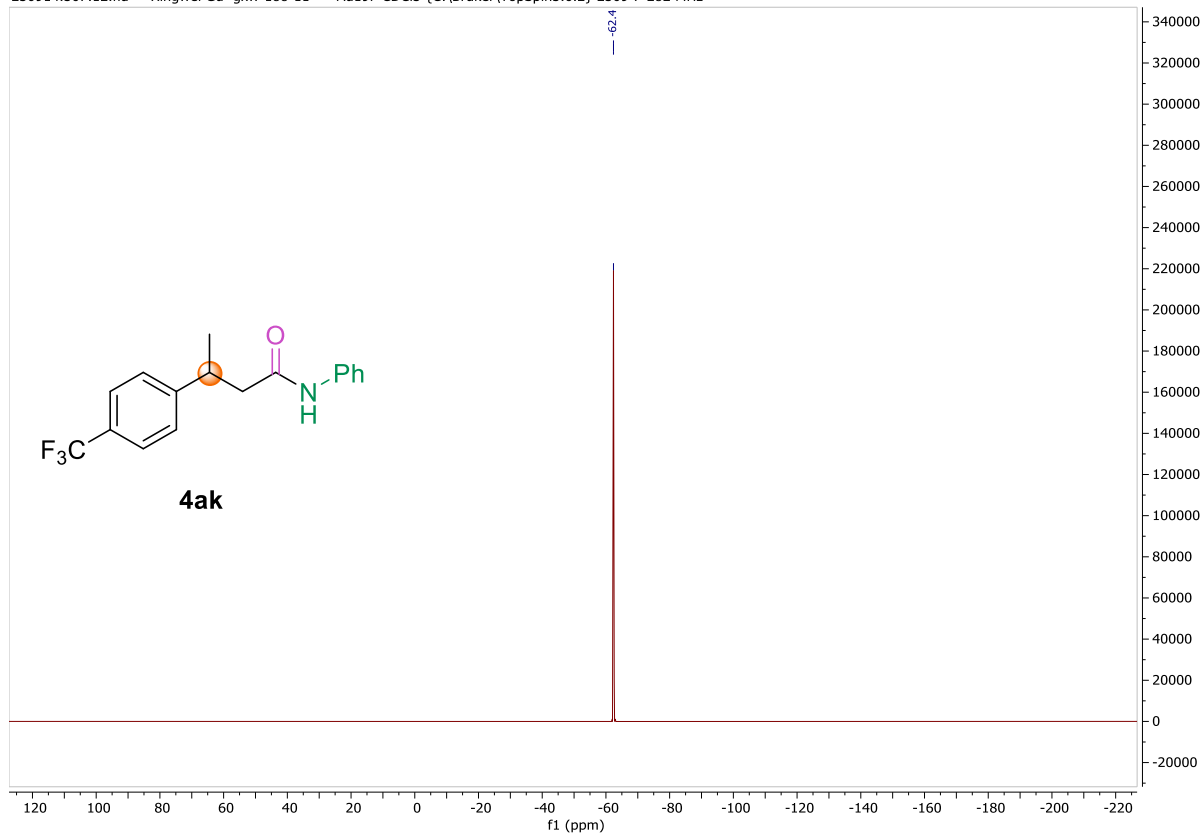

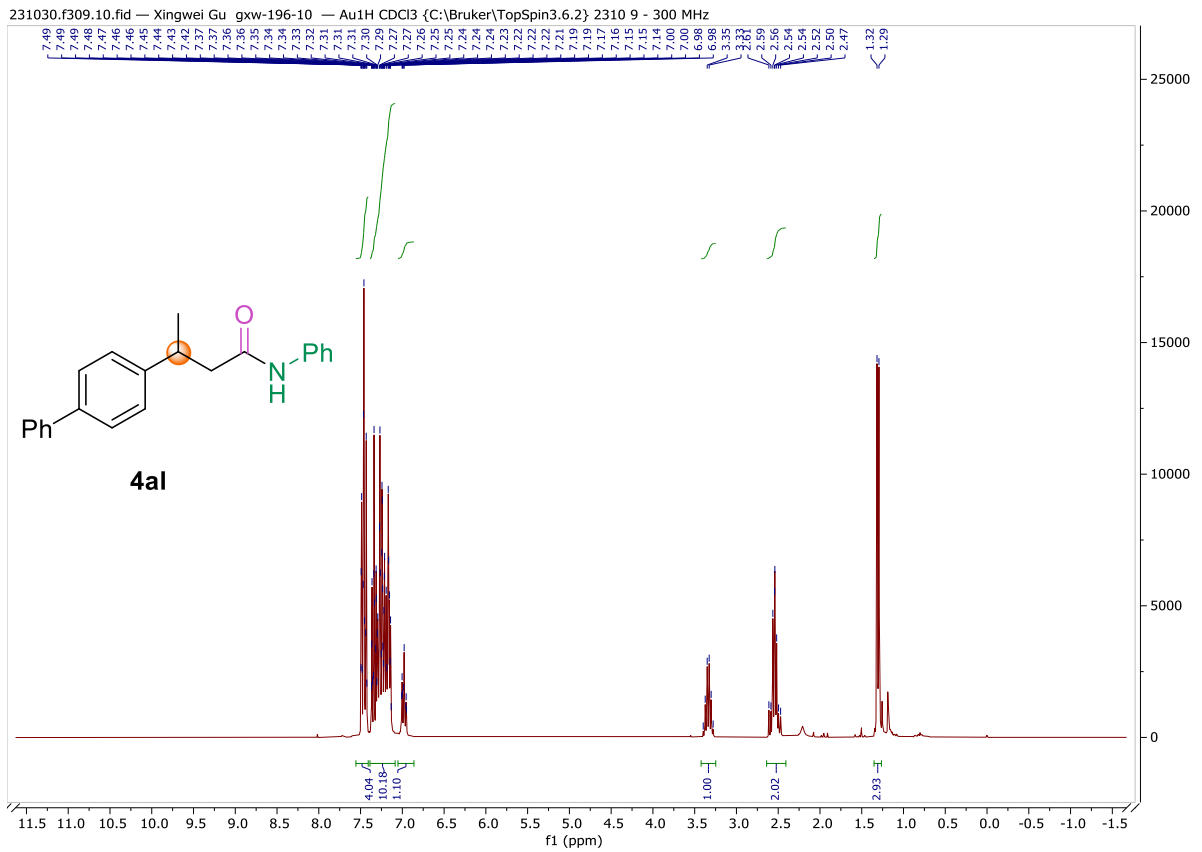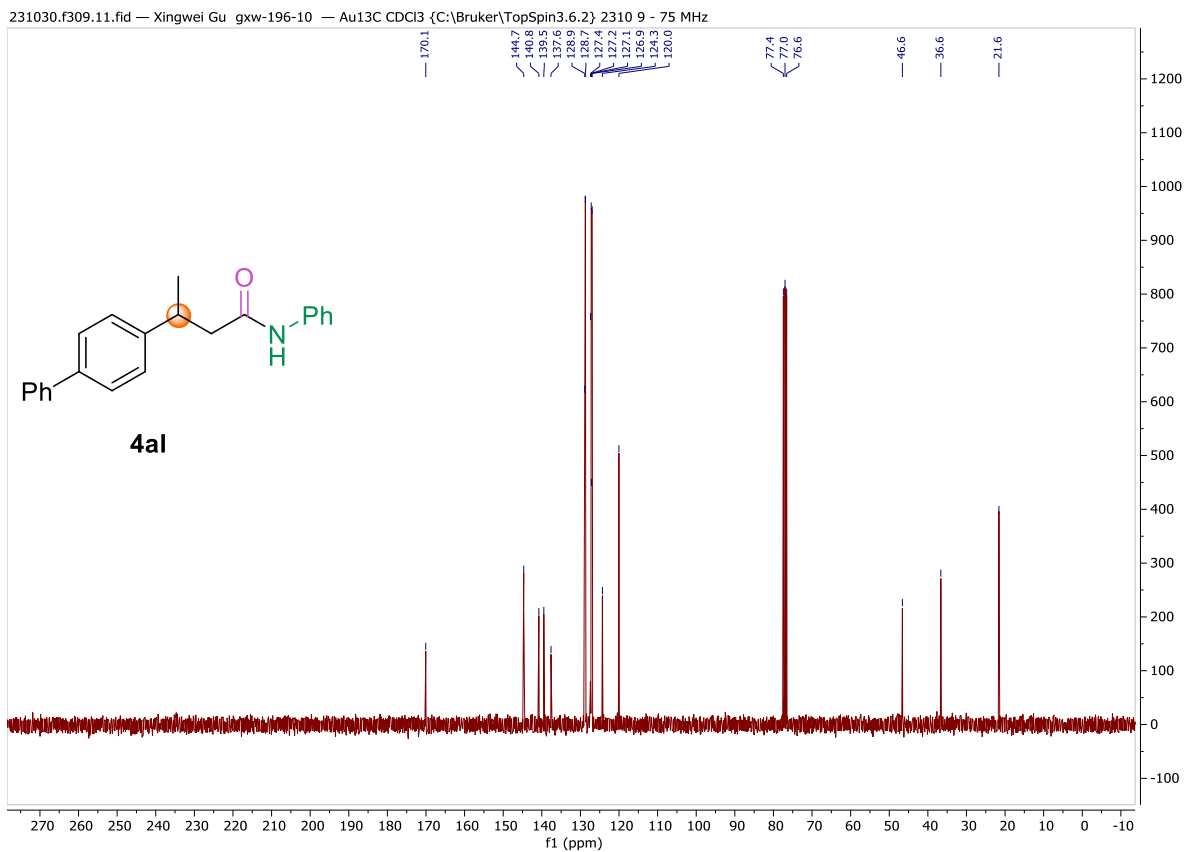



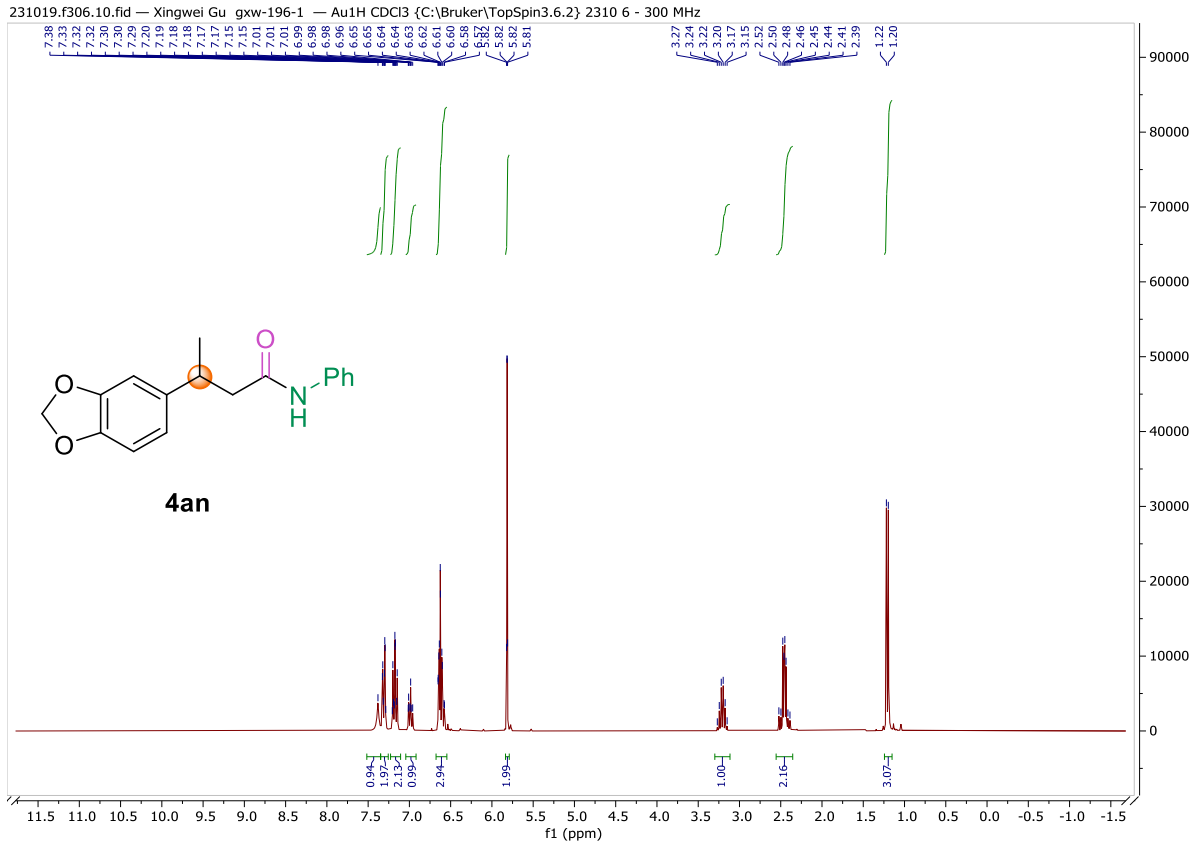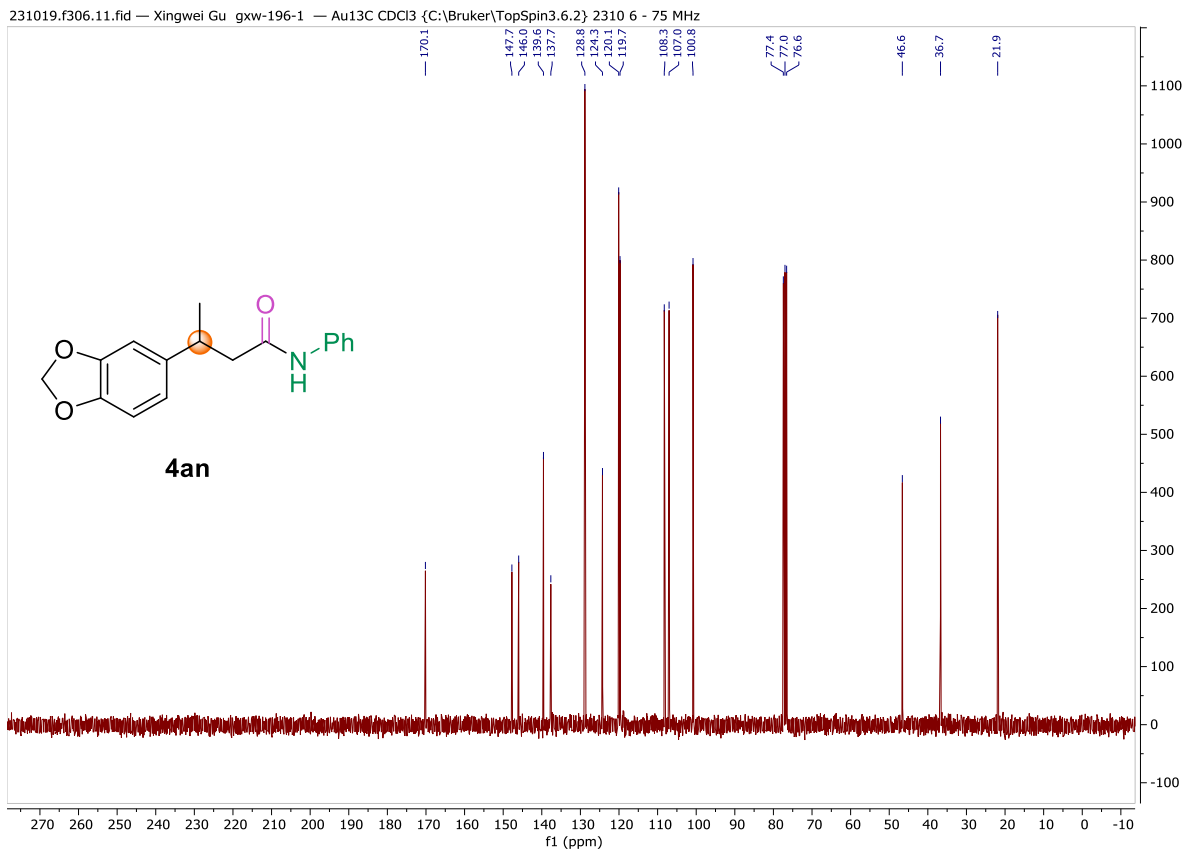



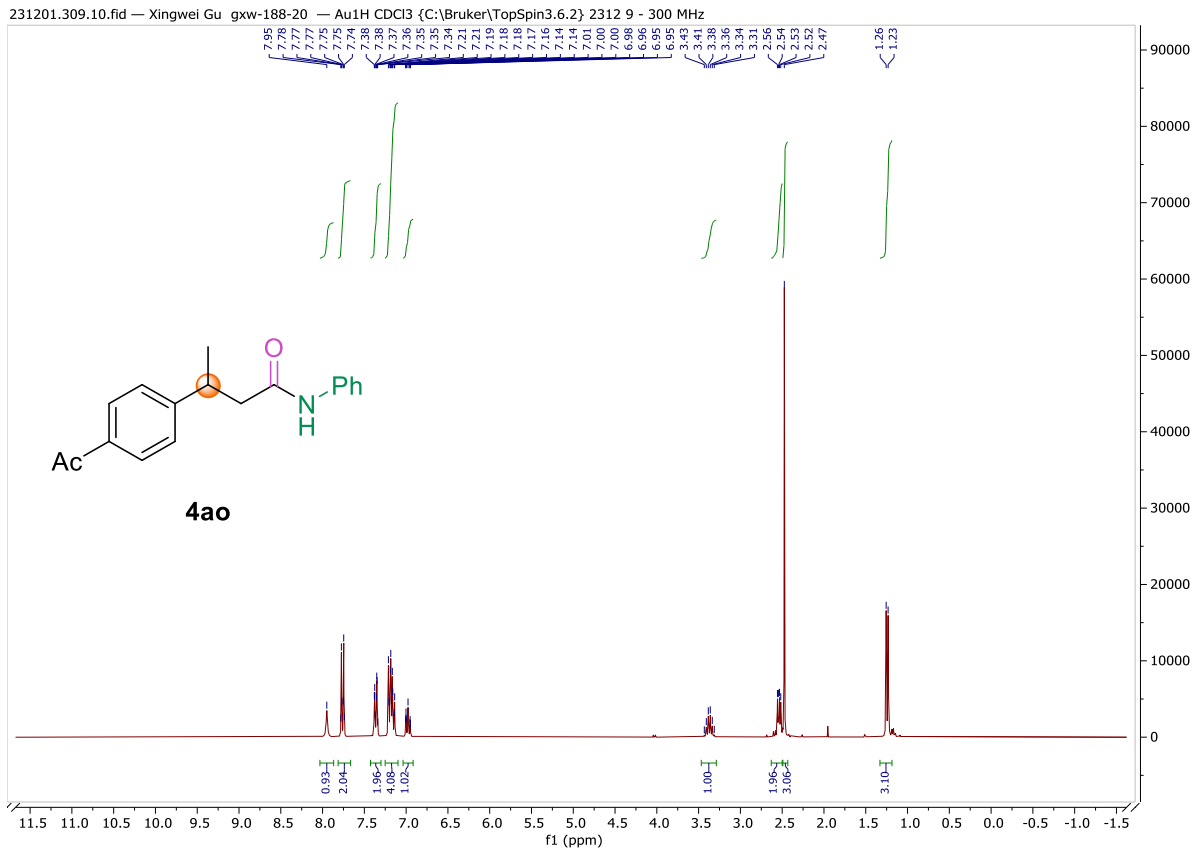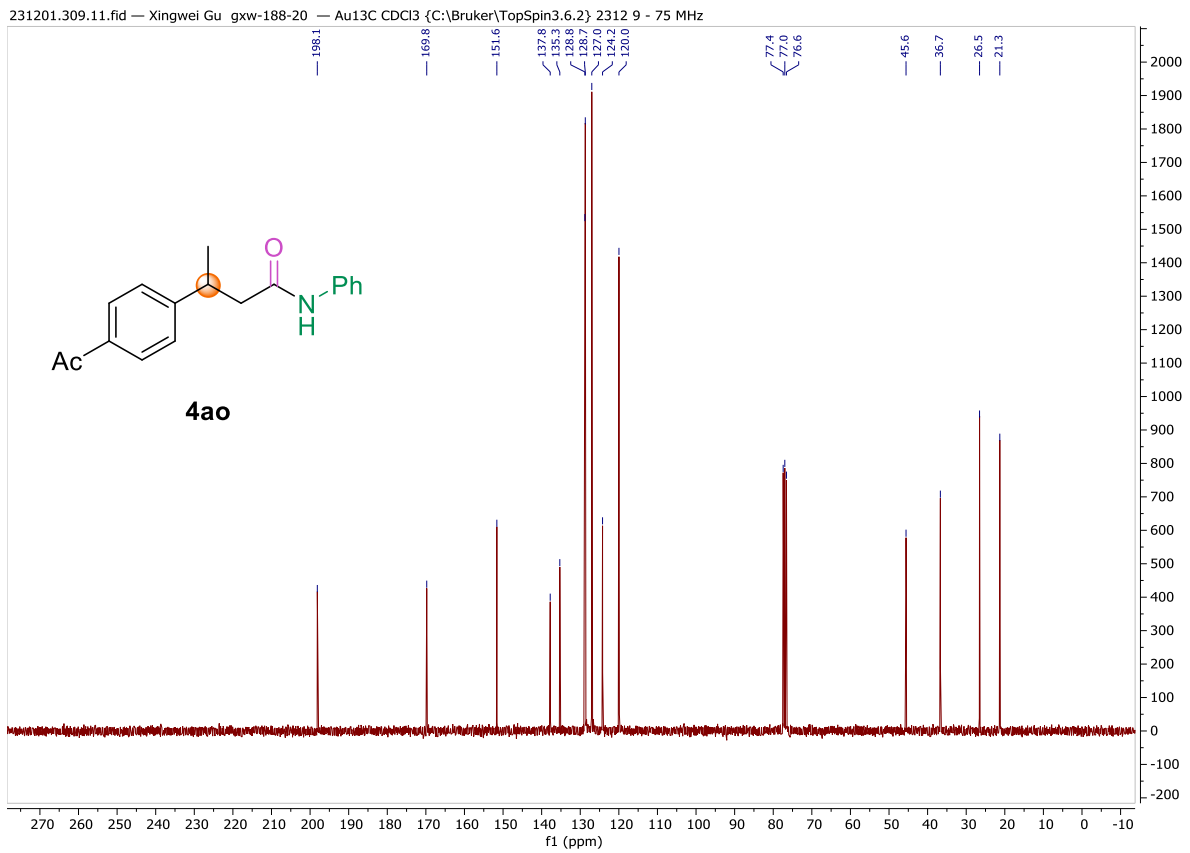

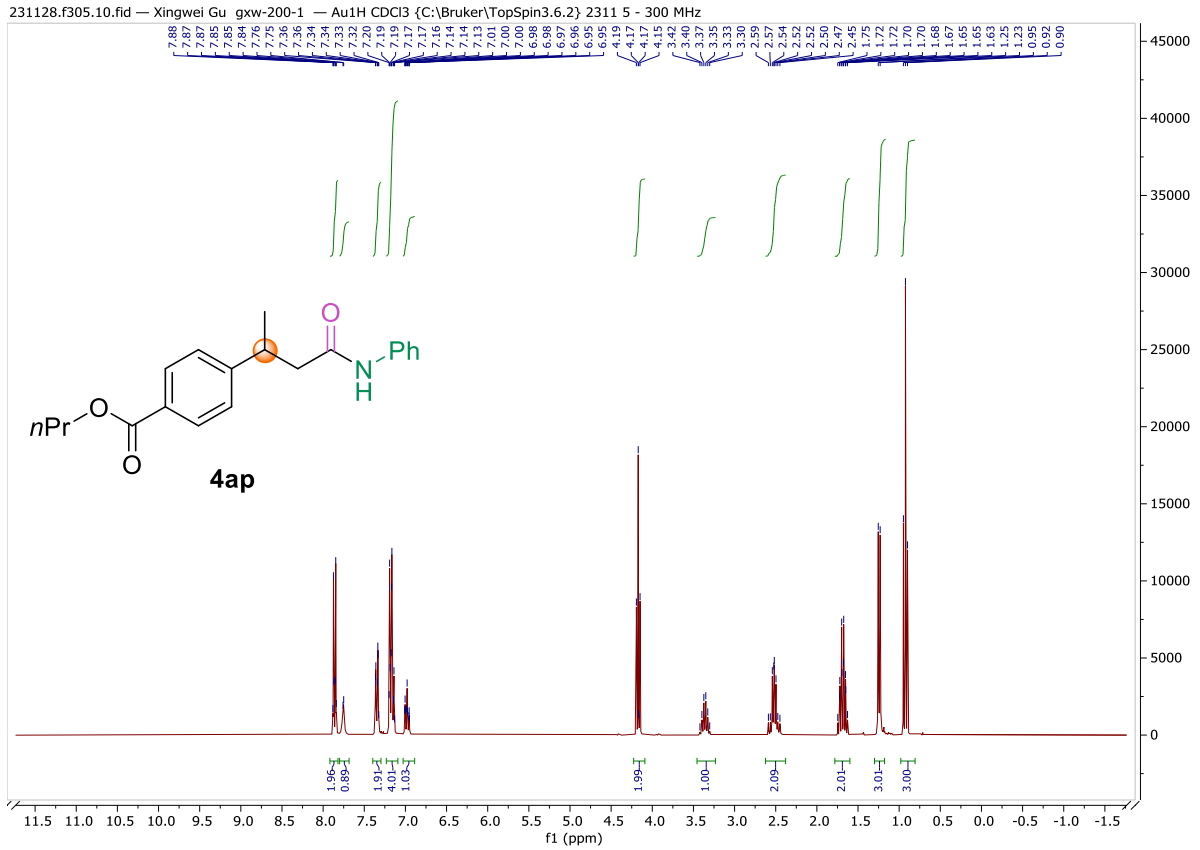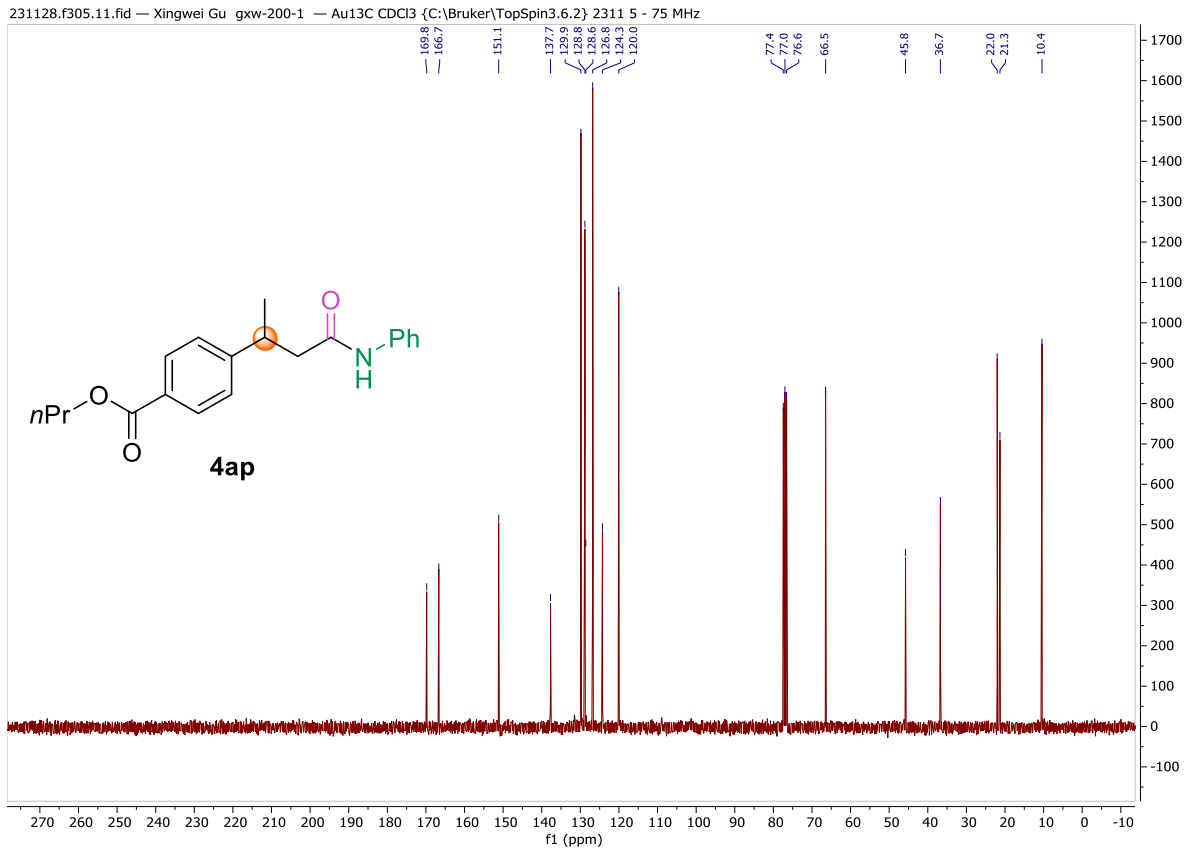

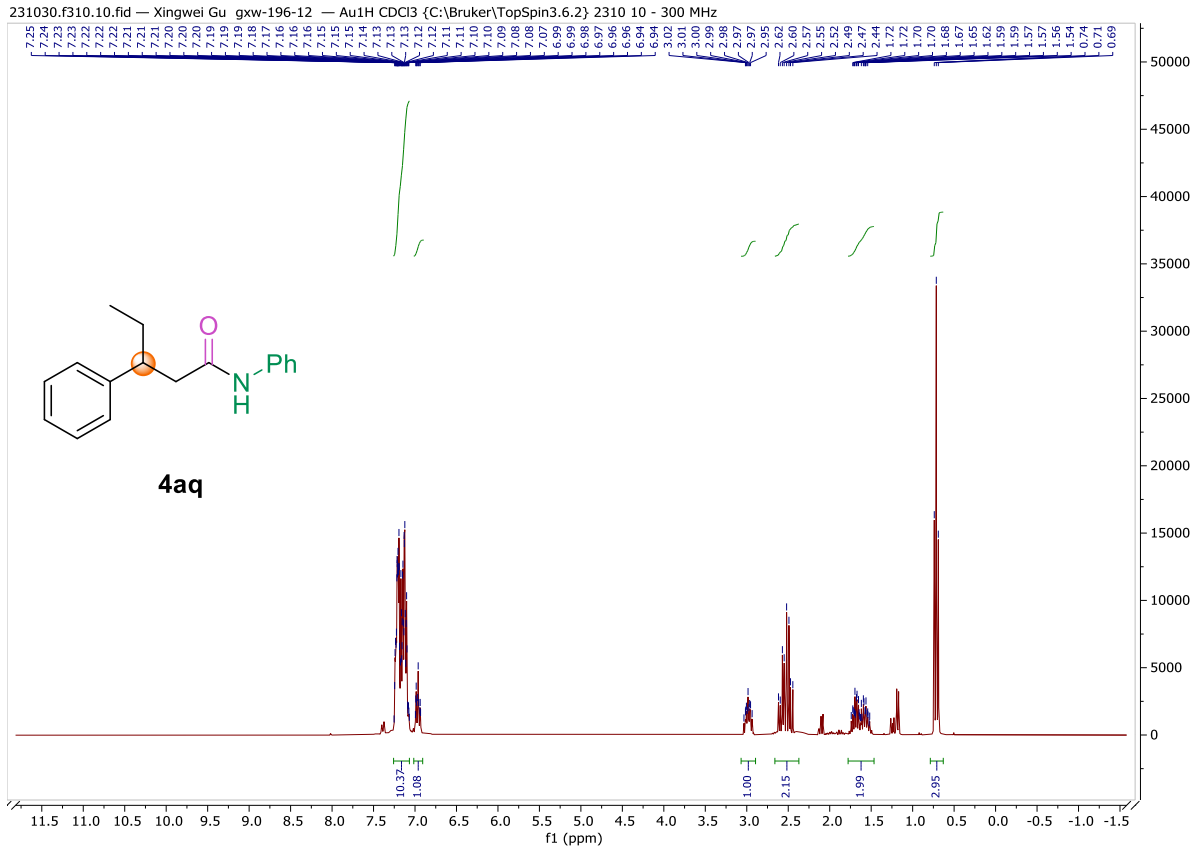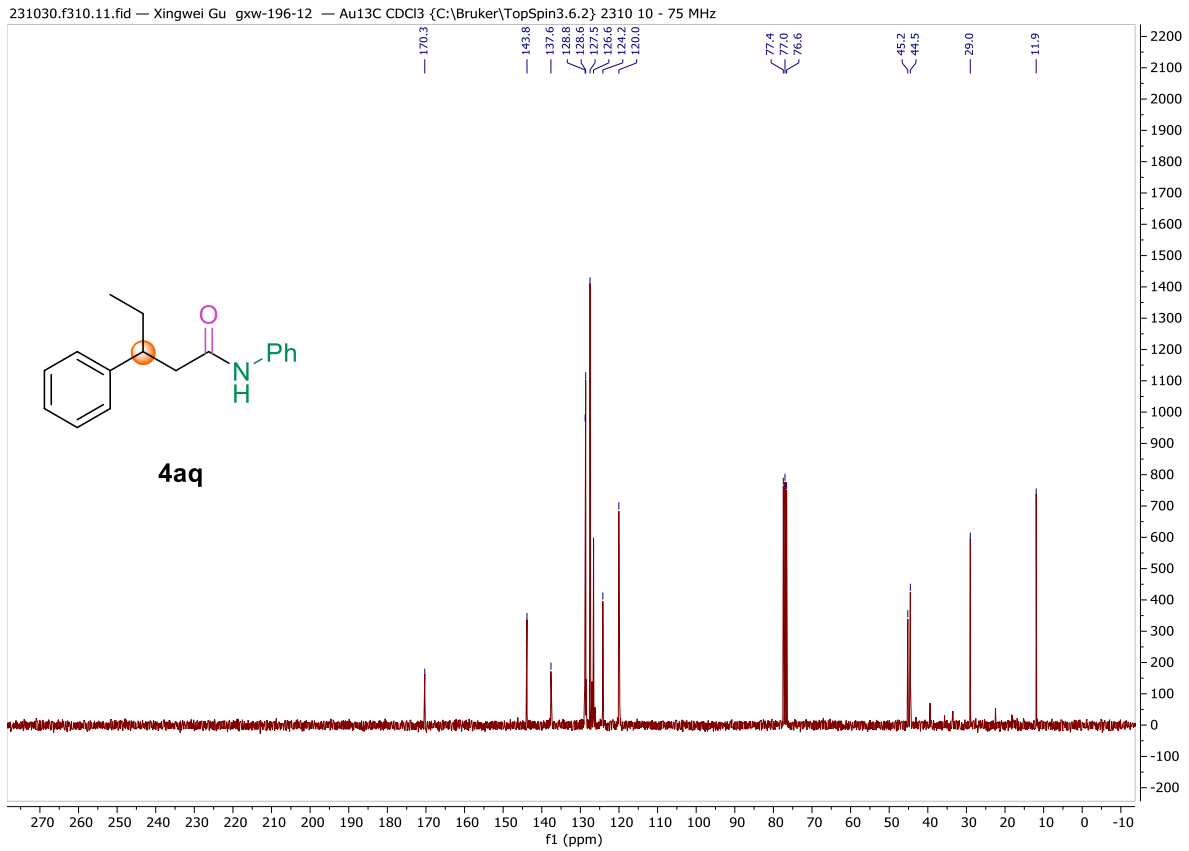

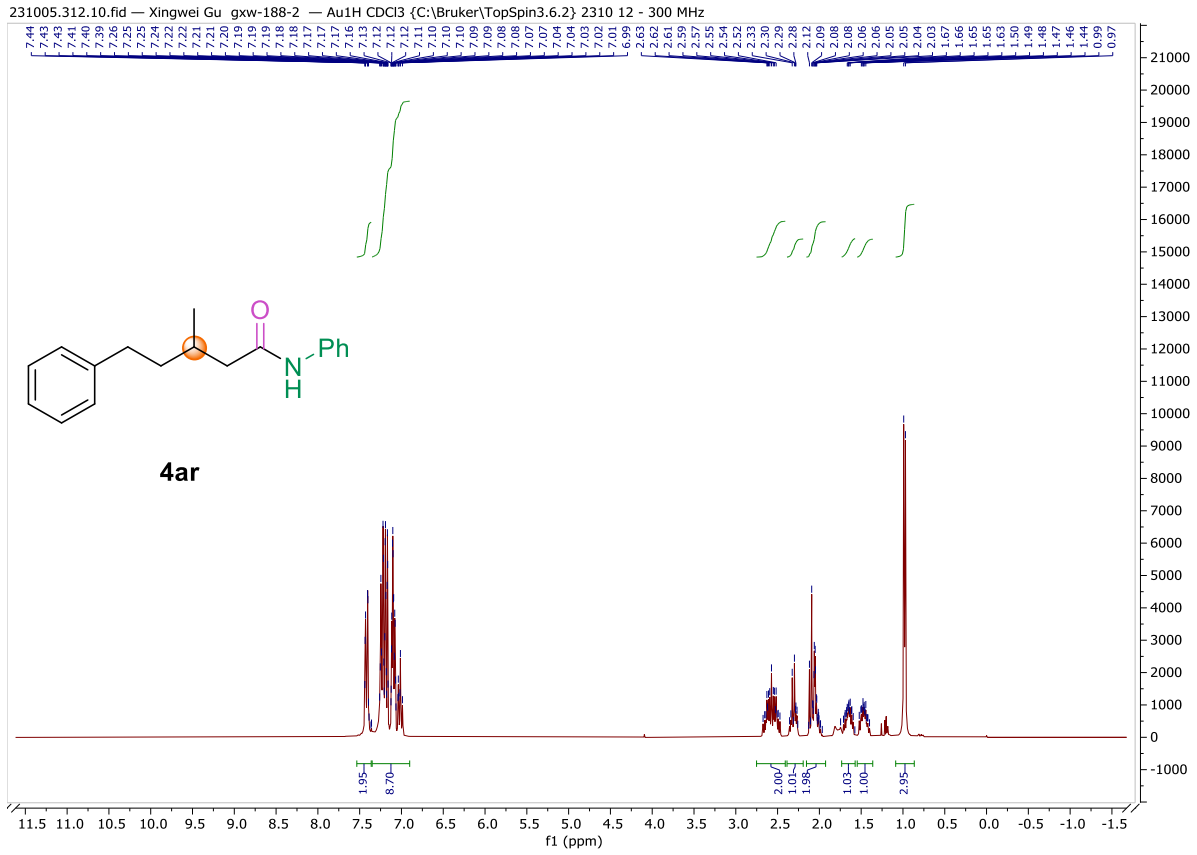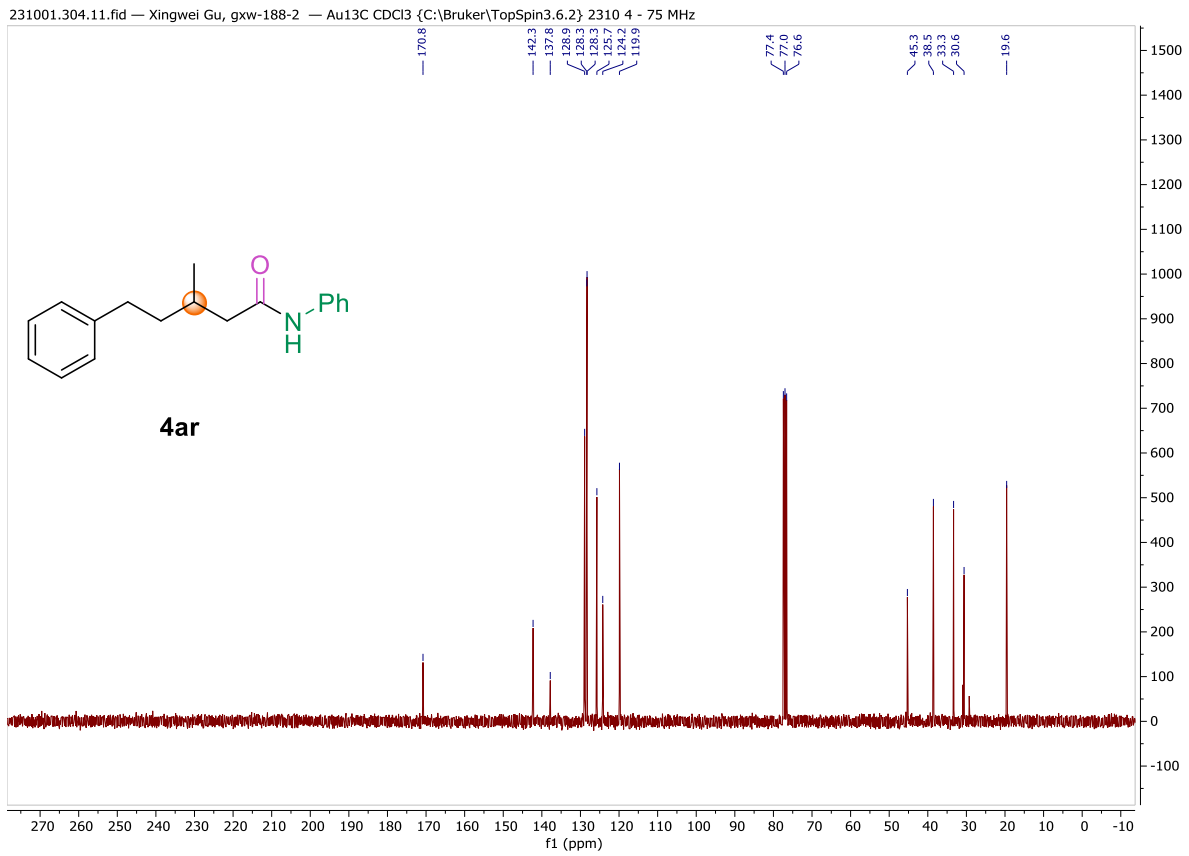

231005.309.10.fid — Xingwei Gu gxw-188-1 — Au1H CDCl3 {C:\Bruker\TopSpin3.6.2} 2310 9 - 300 MHz

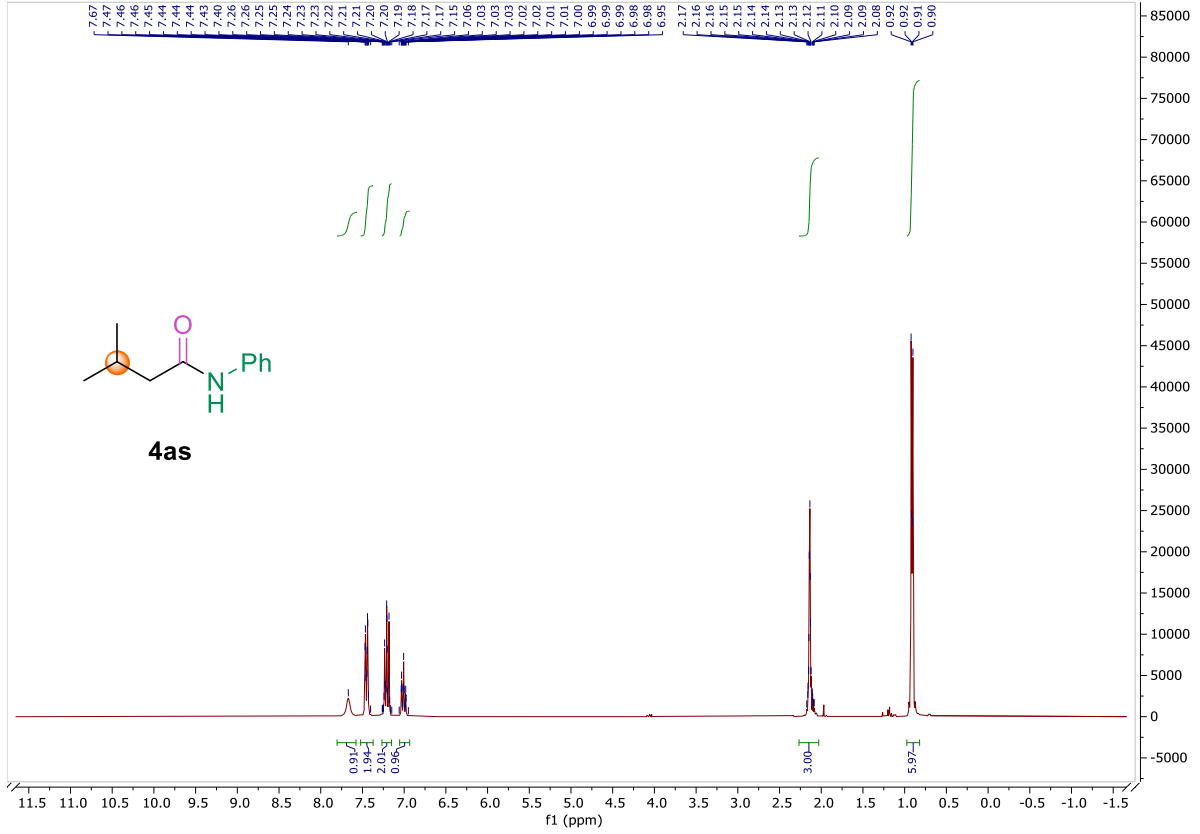

231005.309.11.fid — Xingwei Gu gxw-188-1 — Au13C CDCl3 {C:\Bruker\TopSpin3.6.2} 2310 9 - 75 MHz

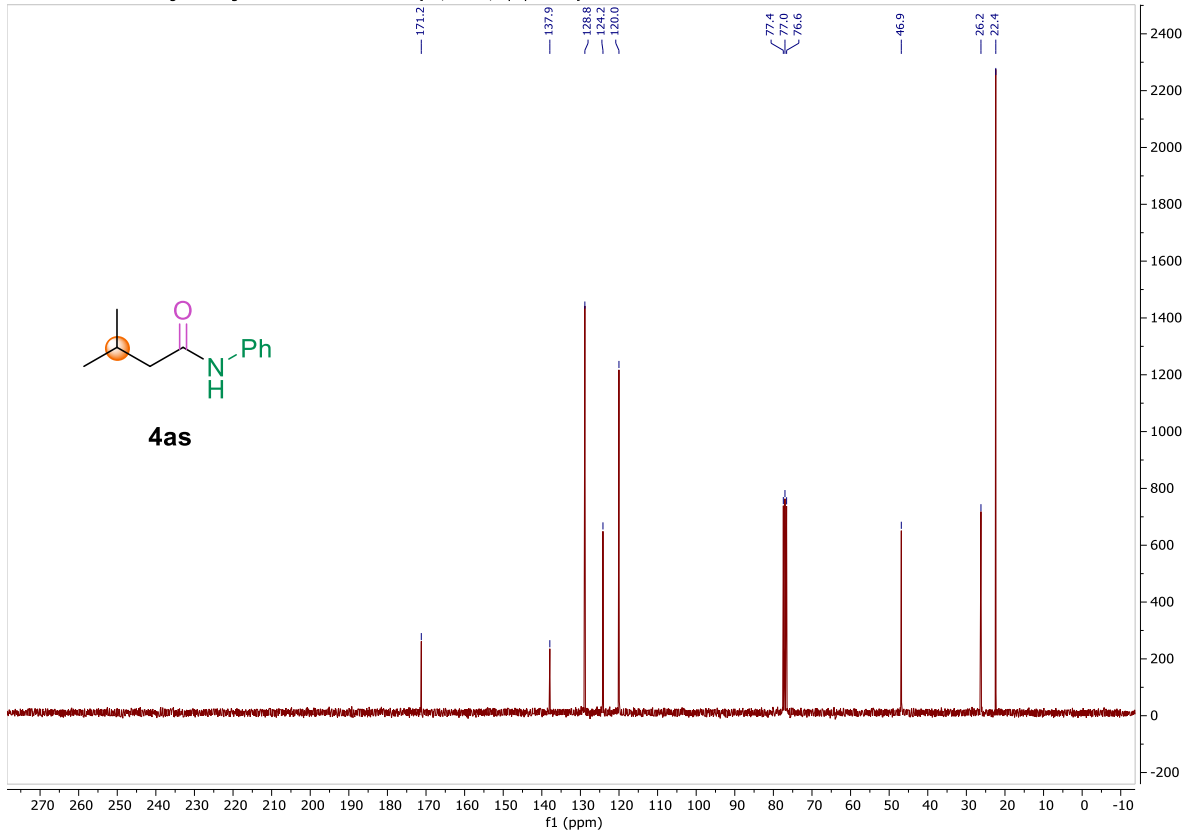

231024.417.10.fid — Xingwei Gu gxw-189-8 — Au1H CDCl3 {C:\Bruker\TopSpin3.6.2} 2310 17 - 300 MHz

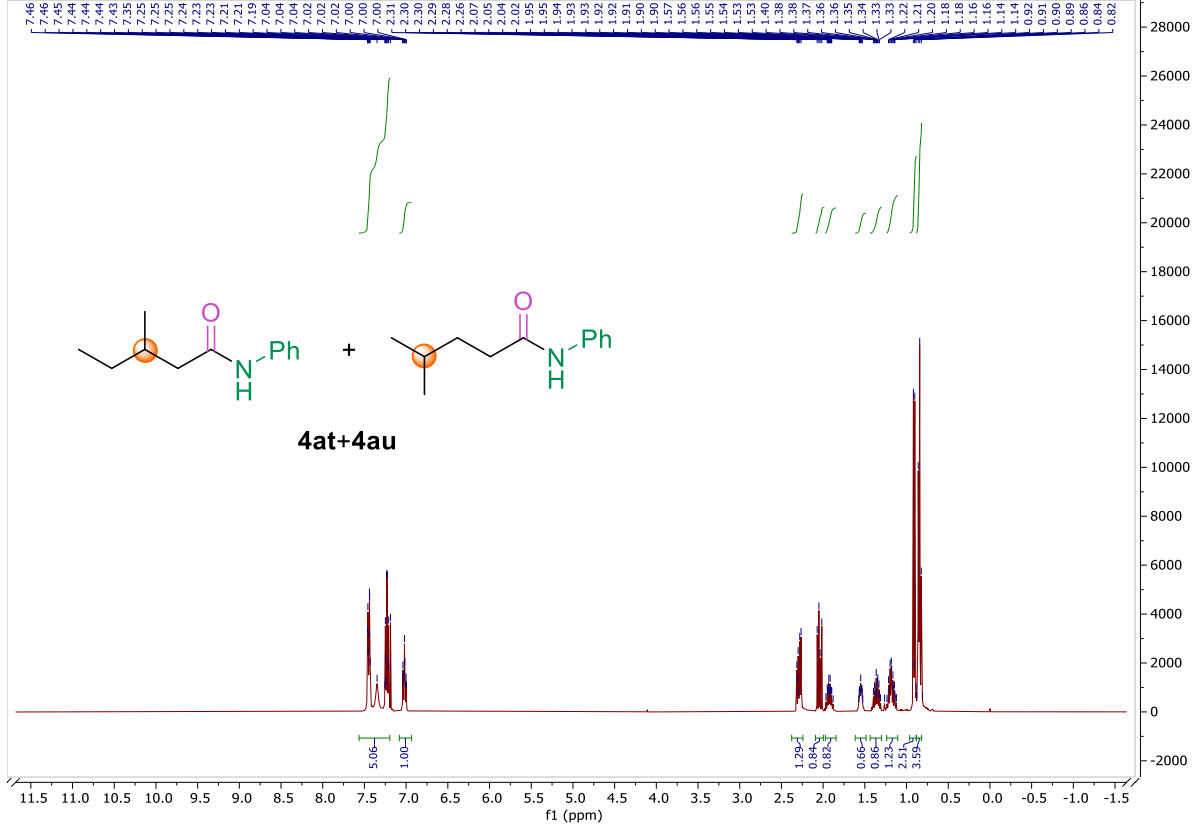



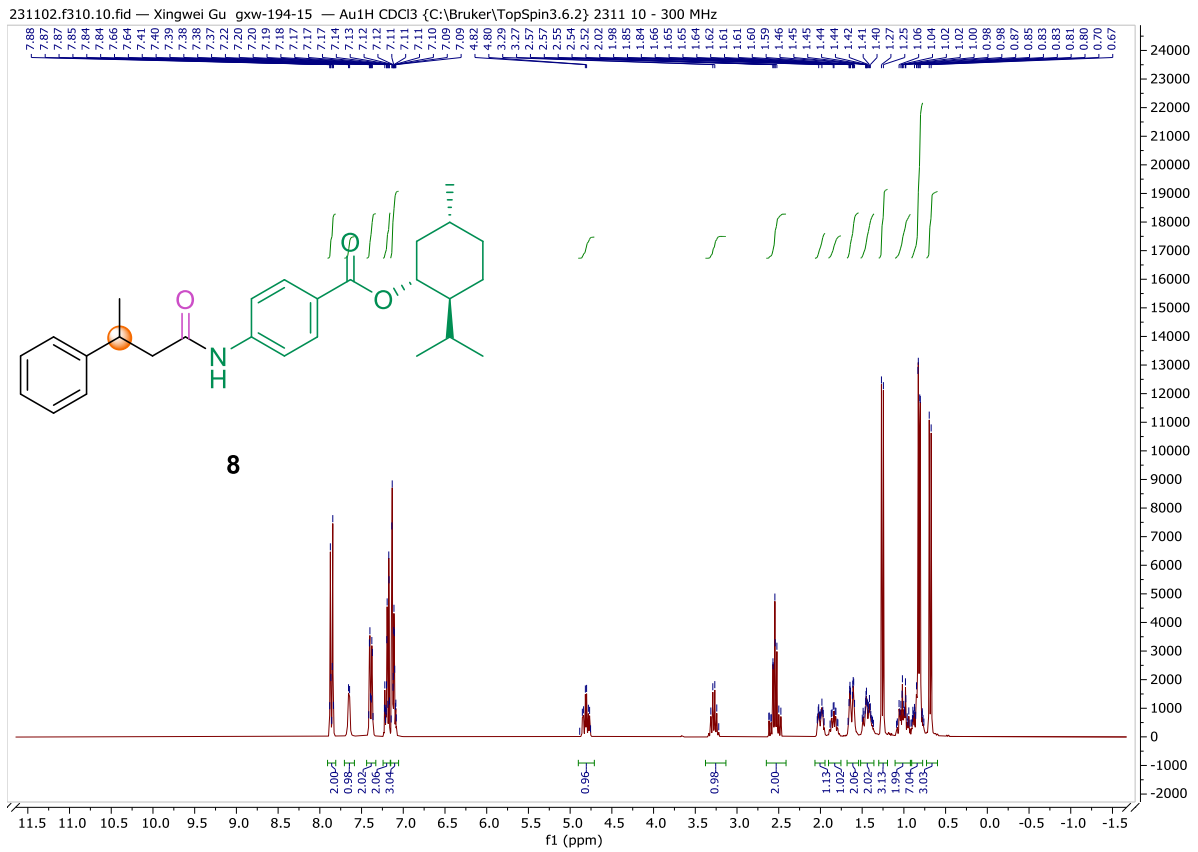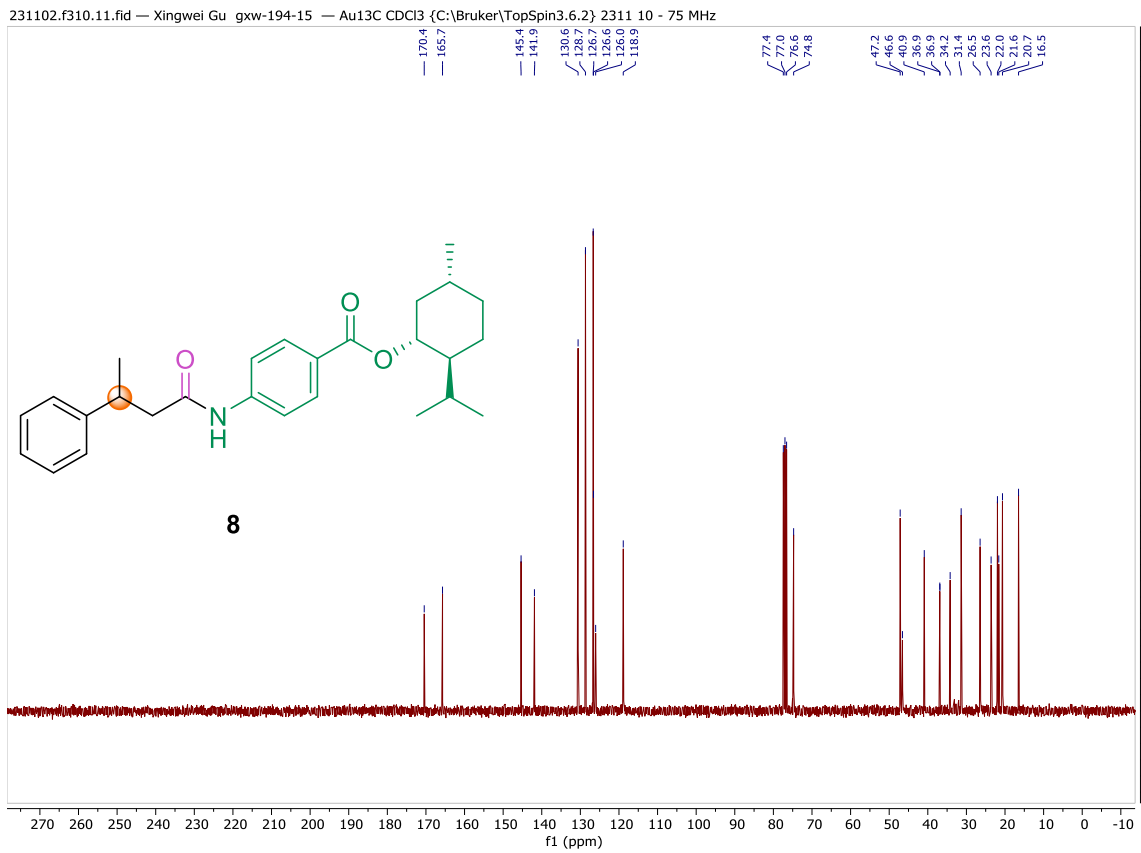



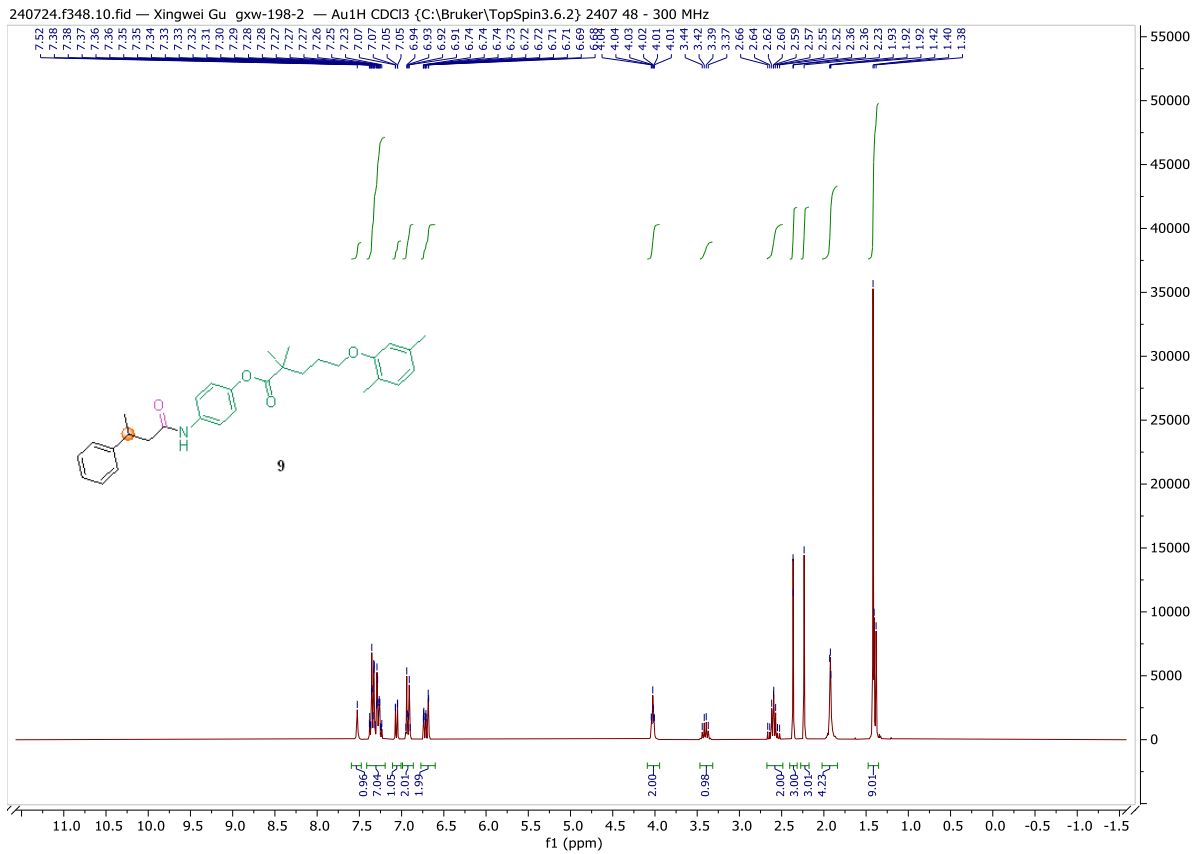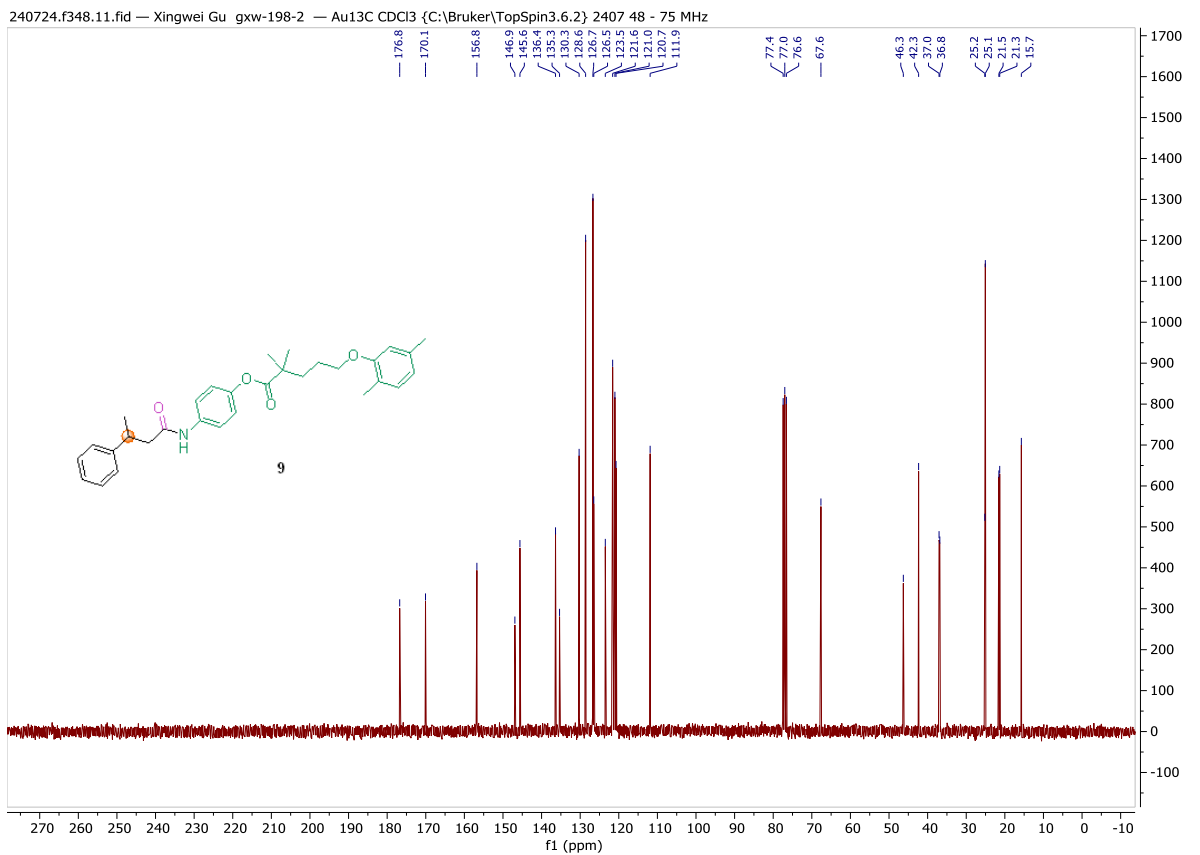

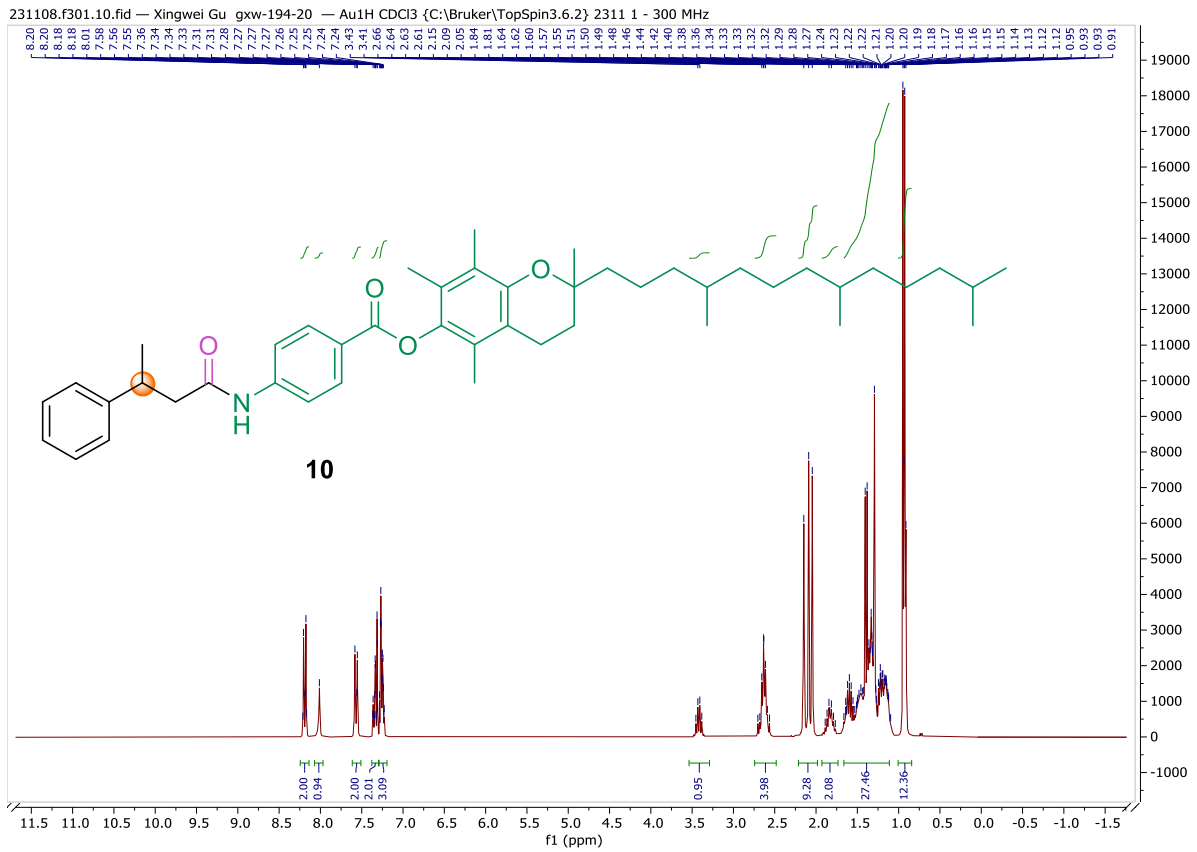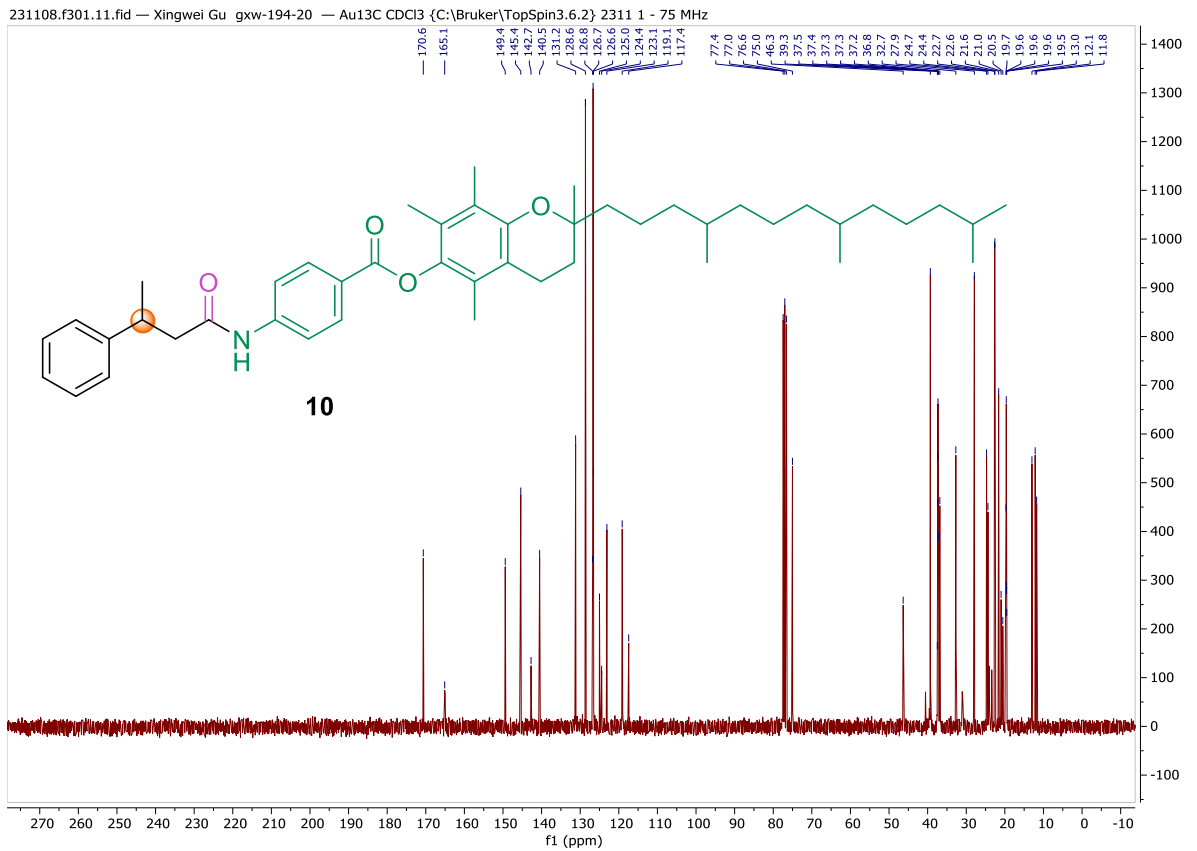

240724.f349.10.fid — Xingwei Gu gxw-198-3 — Au1H CDCl3 {C:\Bruker\TopSpin3.6.2} 2407 49 - 300 MHz

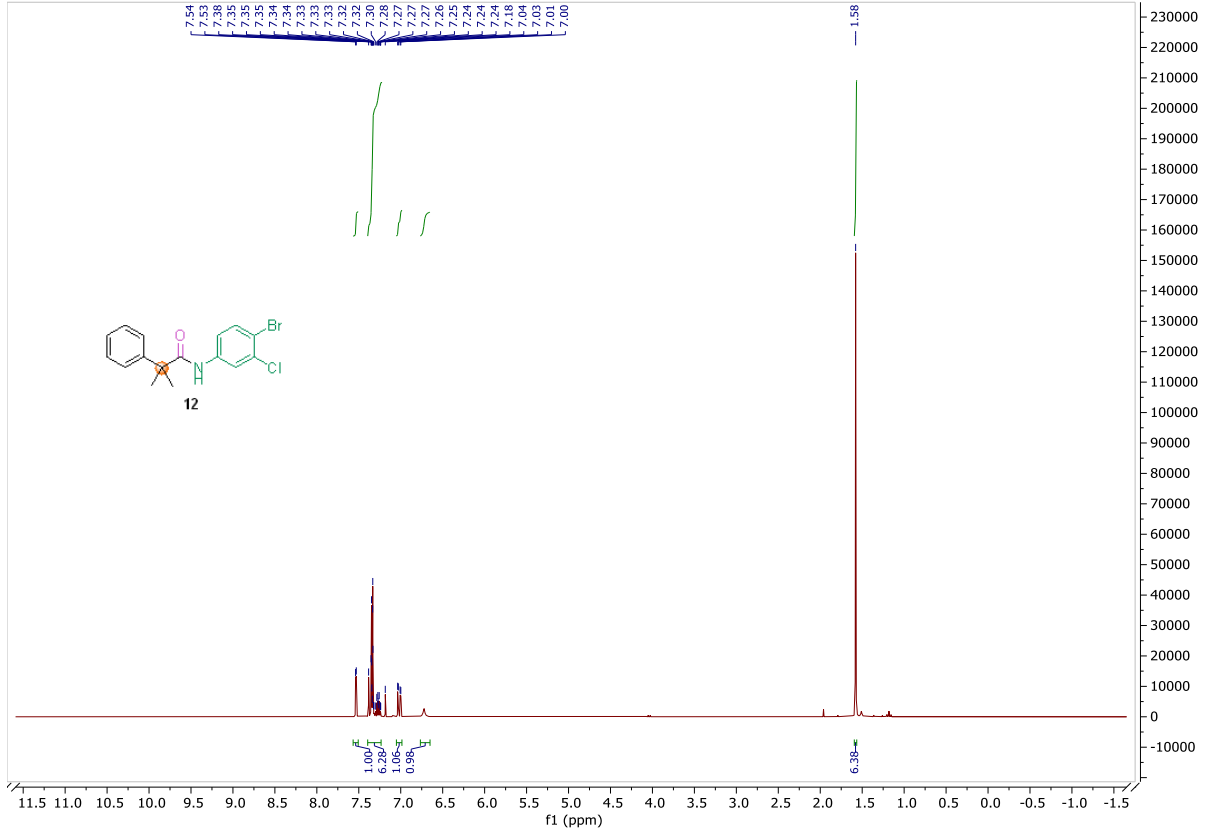

240724.f349.11.fid — Xingwei Gu gxw-198-3 — Au13C CDCl3 {C:\Bruker\TopSpin3.6.2} 2407 49 - 75 MHz

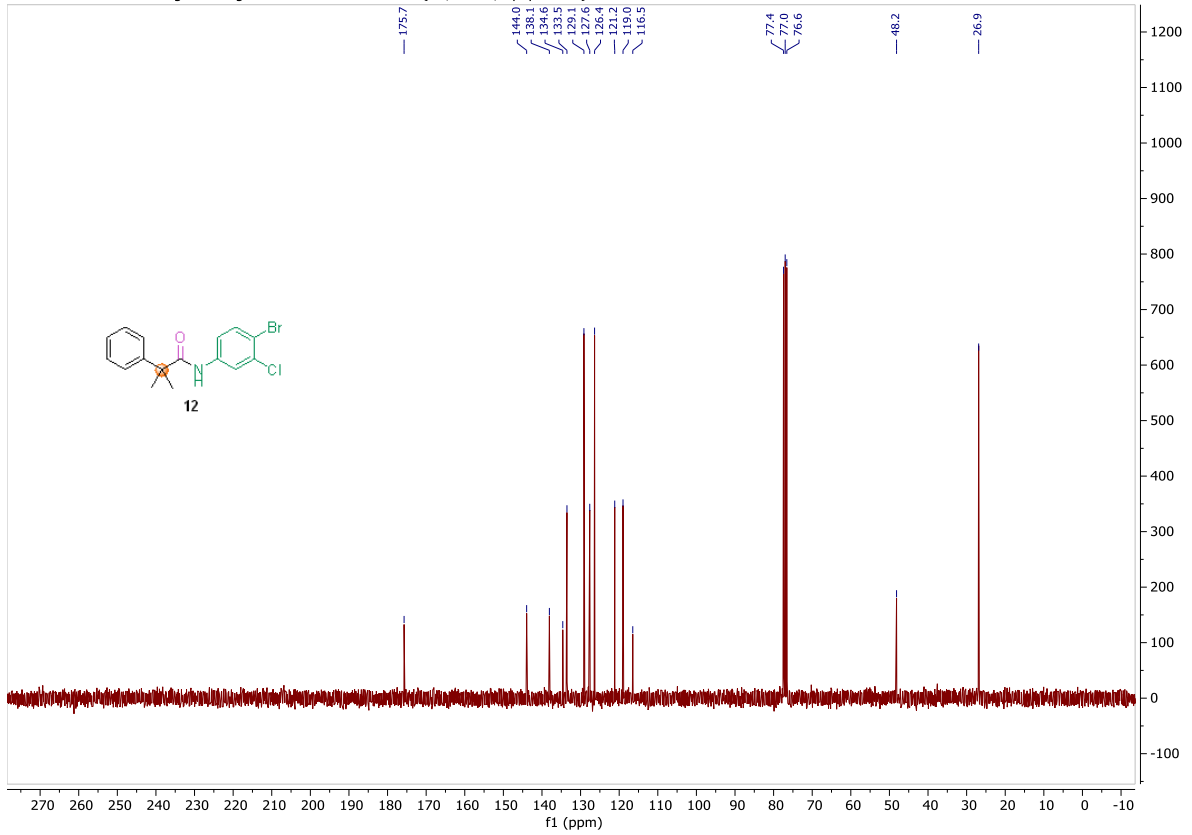

231128.f304.10.fid — Xingwei Gu gxw-199-6 — Au1H CDCl3 {C:\Bruker\TopSpin3.6.2} 2311 4 - 300 MHz

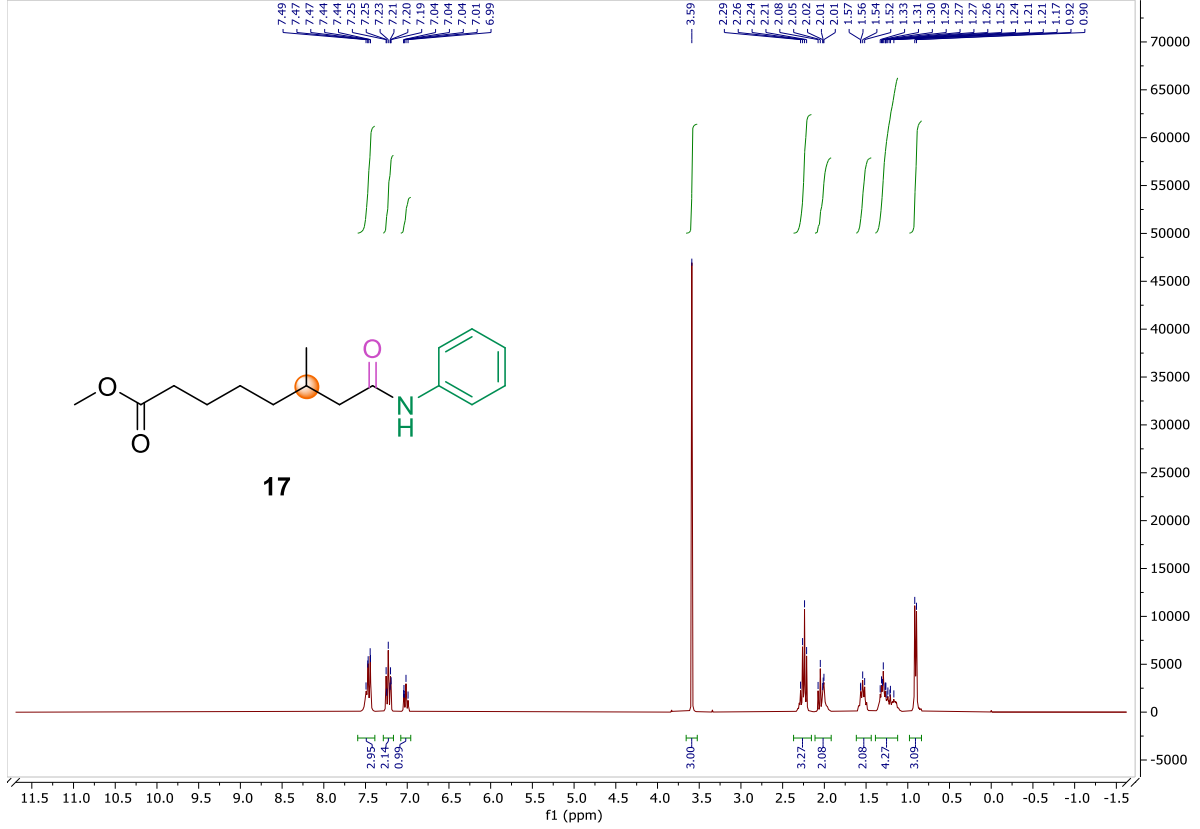

231128.f304.11.fid — Xingwei Gu gxw-199-6 — Au13C CDCl3 {C:\Bruker\TopSpin3.6.2} 2311 4 - 75 MHz

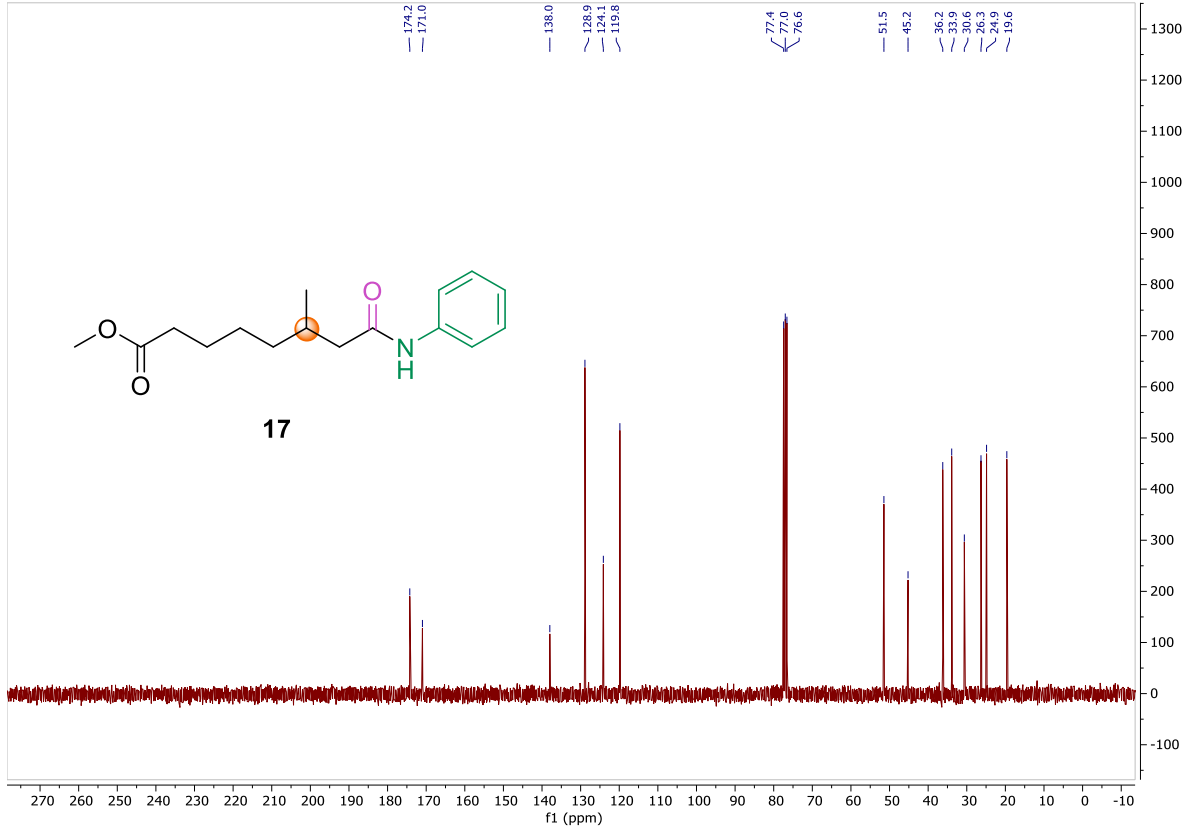

Supplement: SC-OLF-D4SC06011C-s001.pdf [file SC-OLF-D4SC06011C-s001.pdf]
